# Supplementary material for: Evolutionary footprints of a cold relic in a rapidly warming world
Source: eLife. 2021 Dec 21;10:e71572. doi: 10.7554/eLife.71572 (PMC8741218; doi:10.7554/eLife.71572)
Supplement: Supplementary file 1. — List of accepted Cochlearia taxa according to BrassiBase (Kiefer et al., 2014), in alphabetical order together with information on cytotype, ploidy level, ecology and distribution area. [file elife-71572-supp1.xlsx]

## Sheet: Tabelle1
Supplementary File 1: Cochlearia species list. List of accepted Cochlearia taxa according to BrassiBase (Kiefer et al. 2013), in alphabetical order together with information on cytotype, ploidy level, ecology and distribution area.
Taxon name	Cytotype	Ecology	Distribution
Cochlearia aestuaria (Lloyd) Heywood	2n=2x=12	coastal	Northern Spain
Cochlearia anglica L.	2n=8x=48/60	coastal	Coasts of Central Europe (incl. UK)
Cochlearia bavarica Vogt	2n=6x=36	mountainous	Southern Germany
Cochlearia borzaeana (Coman & Nyaudy) Pobed.	2n=8x=48	mountainous	Romania
Cochlearia danica L.	2n=6x=42	coastal	Coasts of Central Europe
Cochlearia excelsa Zahlbr. ex Fritsch	2n=2x=12	high alpine	Eastern Austrian Alps
Cochlearia groenlandica L. (incl. Cochlearia islandica Pobed. with 2n=2x=12)	2n=2x=14	arctic	Circum-arctic regions and
			Iceland
Cochlearia macrorrhiza (Schur) Pobed.	2n=2x=12	lowland	Eastern Austria (extinct in the wild)
Cochlearia micacea E.S. Marshall	2n=4x=26	mountainous	Uplands of northern UK
Cochlearia officinalis L.	2n=4x=24	coastal	Coasts of Central Europe
Cochlearia officinalis subsp. integrifolia (Hartm.) Nordal & Stabbetorp	2n=4x=24	coastal	Northern Scandinavia
Cochlearia officinalis subsp. norvegica Nordal & Stabbetorp	2n=4x=24	coastal	Norway
Cochlearia officinalis subsp. officinalis L.	2n=4x=24	coastal	Central European coasts
Cochlearia polonica A. Fröhl.	2n=6x=36	calcareous springs	Poland
Cochlearia pyrenaica DC. (incl. Cochlearia pyrenaica subsp. alpina (Bab.) Dalby with 2n=4x=12/24)	2n=2x=12	calcareous springs	Central Europe (incl. UK)
Cochlearia pyrenaica subsp. pyrenaica	2n=2x=12	calcareous springs	Central Europe
Cochlearia scotica Druce	2n=4x=24	coastal	Northern UK, Ireland
Cochlearia sessilifolia Rollins	2n=2x=14	arctic	Alaska
Cochlearia tatrae Borbás	2n=6x=42	high alpine	High Tatra Mountains; Czech. Rep., Poland
Cochlearia tridactylites Banks ex DC.	2n=2x=14	arctic	Eastern Canada
