# Supplementary material for: Evolutionary footprints of a cold relic in a rapidly warming world
Source: eLife. 2021 Dec 21;10:e71572. doi: 10.7554/eLife.71572 (PMC8741218; doi:10.7554/eLife.71572)
Supplement: Supplementary file 2. [file elife-71572-supp2.xlsx]

## Sheet: Main
UniqueID	PubTitle	Author	Year	Extracted from citing literature	Nation	Place	PopID	IndNo	SpecAut	Ploidy	ChromNo	MaxChrom	MaxAberr	AberrYN	TwoCVal	North	East	Coordinates extracted	Cultivation?
00005	Cytological studies on Cochlearia polonica. Acta Soc Bot Pol 20(2):635–646	Bajer	1950	Saunte 1955	PL	original wild location: near Olkusz in southern Poland, flooded banks of the upper Biała river (ext. 1994)	NA	NA	C. polonica	6	24	36	12	y		50.2833	19.55	c.e.
00026	Species-crosses in Cochlearia, with a preliminary account of their cytology, JOURNAL OF GENETIC8, VOL. XIII. NO. 2	Crane, M.B. & Gairdner, A.E.	1923	Saunte 1955	UK	Blakeney Point, Norfolk	NA	NA	C. anglica	6	24	37	13	y		52.9766	0.973584	c.e.
00027	Species-crosses in Cochlearia, with a preliminary account of their cytology, JOURNAL OF GENETIC8, VOL. XIII. NO. 2	Crane, M.B. & Gairdner, A.E.	1923	Saunte 1955	UK	Blakeney Point, Norfolk	NA	NA	C. anglica	6	24	44	20	y		52.9766	0.973584	c.e.
00028	Species-crosses in Cochlearia, with a preliminary account of their cytology, JOURNAL OF GENETIC8, VOL. XIII. NO. 2	Crane, M.B. & Gairdner, A.E.	1923	Saunte 1955	UK	Blakeney Point, Norfolk	NA	NA	C. anglica	6	24	37	13	y		52.9766	0.973584	c.e.
00029	Species-crosses in Cochlearia, with a preliminary account of their cytology, JOURNAL OF GENETIC8, VOL. XIII. NO. 2	Crane, M.B. & Gairdner, A.E.	1923	Saunte 1955	UK	Blakeney Point, Norfolk	NA	NA	C. anglica	6	24	42	18	y		52.9766	0.973584	c.e.
00030	Species-crosses in Cochlearia, with a preliminary account of their cytology, JOURNAL OF GENETIC8, VOL. XIII. NO. 2	Crane, M.B. & Gairdner, A.E.	1923	Saunte 1955	UK	Hayling Island, Hants	NA	NA	C. anglica	8	48	50	2	y		50.7949	-0.976262	c.e.
00031	Species-crosses in Cochlearia, with a preliminary account of their cytology, JOURNAL OF GENETIC8, VOL. XIII. NO. 2	Crane, M.B. & Gairdner, A.E.	1923	Saunte 1955	UK	Hayling Island, Hants.	NA	NA	C. anglica	8	24	44	20	y		50.7949	-0.976262	c.e.
00032	Species-crosses in Cochlearia, with a preliminary account of their cytology, JOURNAL OF GENETIC8, VOL. XIII. NO. 2	Crane, M.B. & Gairdner, A.E.	1923	Saunte 1955	NA	St. David's off the southwest coast of Wales (Gill 1978: Pembs.)	NA	NA	C. danica	6	42	42	0	n		51.8853	-5.26967	c.e.
00034	Species-crosses in Cochlearia, with a preliminary account of their cytology, JOURNAL OF GENETIC8, VOL. XIII. NO. 2	Crane, M.B. & Gairdner, A.E.	1923	Saunte 1955	NA	St. David's off the southwest coast of Wales (Gill 1978: Pembs.)	NA	NA	C. officinalis	4	24	24	4	y		51.8853	-5.26967	c.e.
00035	Cochlearia officinalis s.str. und Cochlearia pyrenaica in Hessen. Hessische Floristische Briefe 10:51-53.	Dersch ex Ludwig	1961	Vogt 1985	GER	Deutschland: Hessen; Gersfeld in der Rhön.	NA	NA	C. pyrenaica	2	12	12	0	n		50.4705	9.96325	c.e.
00036	Cochlearia officinalis s.str. und Cochlearia pyrenaica in Hessen. Hessische Floristische Briefe 10:51-53.	Dersch ex Ludwig	1961	Vogt 1985	GER	Deutschland: Nordrhein-Westfalen; Almequelle in Brilon.	NA	NA	C. pyrenaica	2	12	12	0	n		51.4501	8.62192	c.e.
00040	A morphological and cytological investigation of Cochlearia populations on the Gower Peninsula, Glenmorgan. New. Phytol. (1977) 79, 455-458.	Fearn, G.M.	1978		UK	Worms Head, Gower Peninsula, Glenmorgan	NA	NA	C. officinalis	4	24	26	2	y		51.564	-4.3197	c.e.
00041	A morphological and cytological investigation of Cochlearia populations on the Gower Peninsula, Glenmorgan. New. Phytol. (1977) 79, 455-458.	Fearn, G.M.	1979		UK	Worms Head, Gower Peninsula, Glenmorgan	NA	NA	C. officinalis x danica	4	24	34	10	y		51.564	-4.3197	c.e.
00042	A morphological and cytological investigation of Cochlearia populations on the Gower Peninsula, Glenmorgan. New. Phytol. (1977) 79, 455-458.	Fearn, G.M.	1980		UK	Worms Head, Gower Peninsula, Glenmorgan	NA	NA	C. officinalis x danica	4	24	24	0	n		51.564	-4.3197	c.e.
00043	A morphological and cytological investigation of Cochlearia populations on the Gower Peninsula, Glenmorgan. New. Phytol. (1977) 79, 455-458.	Fearn, G.M.	1981		UK	Worms Head, Gower Peninsula, Glenmorgan	NA	NA	C. danica	6	42	42	0	n		51.564	-4.3197	c.e.
00044	A morphological and cytological investigation of Cochlearia populations on the Gower Peninsula, Glenmorgan. New. Phytol. (1977) 79, 455-458.	Fearn, G.M.	1982		UK	Worms Head, Gower Peninsula, Glenmorgan	NA	NA	C. danica	6	42	42	0	n		51.564	-4.3197	c.e.
00047	species of British flowering plants.	Flovik, K.	1940	Saunte 1955	Spitzbergen	NA	NA	NA	C. officinalis var. groenlandica	2	14	14	0	n		78.8054	17.9766	c.e.
00048	Chromosome numbers and polyploidy within the flora of Spitzbergen. Hereditas 26, 430-40.	Flovik, K.	1940	Saunte 1955	Spitzbergen	NA	NA	NA	C. groenlandica	2	14	14	0	n		78.8054	17.9766	c.e.
00049	Bemerkungen zur Karyologie der Cochlearia pyrenaica-Gruppe unter besonderer Berücksichtigung von C. macrorrhiza (Schur) Pobed.	G. R. Heubl	1996		AT	Wiener Becken (Koord. aus Kartenabb. geschätzt)	NA	NA	C. macrorrhiza	2	12	12	0	n		47.9302	16.7008	c.e.
00053	Diploids in the genus Cochlearia. Watsonia 6, 188-189	Gill	1965		UK	Helvellyn, Cumberland, v.c. 70	NA	NA	C. alpina	2	12	13	1	y		54.5274	-3.01878	c.e.
00054	Diploids in the genus Cochlearia. Watsonia 6, 188-189	Gill	1965		UK	Malham, Mid-W. Yorks., v.c. 64	NA	NA	C. alpina	2	12	14	2	y		54.0607	-2.15368	c.e.
00059	The cytology and transmission of accessory chromosomes in Cochlearia pyrenaica DC. (Cruciferae)	Gill 1971a	1971		UK	Malham	NA	NA	C. pyrenaica, C. aestuaria	2	12	16	4	y		54.0607	-2.15368	c.e.
00060	Cytological studies in Cochlearia L. (Cruciferae). The origins of C. officinalis L. and C. micaceae Marshall	Gill, J.J.B.	1973		UK	Scotland, Beinn Heasgarnich	NA	NA	C. micacea	4	26	26	0	n		56.5102	-4.57949	c.e.
00061	Cytological studies in Cochlearia L. (Cruciferae). The origins of C. officinalis L. and C. micaceae Marshall	Gill, J.J.B.	1973		UK	Scotland, Ben Lawers	NA	NA	C. micacea	4	26	26	0	n		56.5449	-4.22087	c.e.
00062	Cytological studies in Cochlearia L. (Cruciferae). The origins of C. officinalis L. and C. micaceae Marshall	Gill, J.J.B.	1973		UK	Scotland, Meall nan Tarmachan	NA	NA	C. micacea	4	26	26	0	n		56.5217	-4.30133	c.e.
00065	Cytological studies in Cochlearia L. (Cruciferae). The origins of C. officinalis L. and C. micaceae Marshall	Gill, J.J.B.	1973		BEL	Liege	NA	NA	C. officinalis	4	24	24	0	n		50.6283	5.57546	c.e.
00066	Cytological studies in Cochlearia L. (Cruciferae). The origins of C. officinalis L. and C. micaceae Marshall	Gill, J.J.B.	1973		DK	Copenhagen	NA	NA	C. officinalis	4	24	24	0	n		55.6752	12.6254	c.e.
00067	Cytological studies in Cochlearia L. (Cruciferae). The origins of C. officinalis L. and C. micaceae Marshall	Gill, J.J.B.	1973		FR	Lyons	NA	NA	C. officinalis	4	24	24	0	n		45.7617	4.8373	c.e.	1
00068	Cytological studies in Cochlearia L. (Cruciferae). The origins of C. officinalis L. and C. micaceae Marshall	Gill, J.J.B.	1973		FR	Rouen	NA	NA	C. officinalis	4	24	24	0	n		49.4357	1.09619	c.e.
00069	Cytological studies in Cochlearia L. (Cruciferae). The origins of C. officinalis L. and C. micaceae Marshall	Gill, J.J.B.	1973		GER	Bremen	NA	NA	C. officinalis	4	24	24	0	n		53.0931	8.76016	c.e.
00070	Cytological studies in Cochlearia L. (Cruciferae). The origins of C. officinalis L. and C. micaceae Marshall	Gill, J.J.B.	1973		NL	Amsterdam	NA	NA	C. officinalis	4	24	24	0	n		52.3685	4.88935	c.e.
00071	Cytological studies in Cochlearia L. (Cruciferae). The origins of C. officinalis L. and C. micaceae Marshall	Gill, J.J.B.	1973		NOR	Oslo	NA	NA	C. officinalis	4	24	24	0	n		59.9133	10.7391	c.e.
00072	Cytological studies in Cochlearia L. (Cruciferae). The origins of C. officinalis L. and C. micaceae Marshall	Gill, J.J.B.	1973		PL	Warsaw	NA	NA	C. officinalis	4	24	24	4	y		52.2373	21.0062	c.e.	1
00073	Cytological studies in Cochlearia L. (Cruciferae). The origins of C. officinalis L. and C. micaceae Marshall	Gill, J.J.B.	1973		PT	Sacavem	NA	NA	C. officinalis	4	24	25	1	y		38.7949	-9.10472	c.e.	1
00074	Cytological studies in Cochlearia L. (Cruciferae). The origins of C. officinalis L. and C. micaceae Marshall	Gill, J.J.B.	1973		SWE	Bohuslan	NA	NA	C. officinalis	4	24	24	0	n		57.9022	11.7429	c.e.
00075	Cytological studies in Cochlearia L. (Cruciferae). The origins of C. officinalis L. and C. micaceae Marshall	Gill, J.J.B.	1973		SWE	Stockholm	NA	NA	C. officinalis	4	24	25	1	y		59.3251	18.0711	c.e.
00076	Cytological studies in Cochlearia L. (Cruciferae). The origins of C. officinalis L. and C. micaceae Marshall	Gill, J.J.B.	1973		SWE	Uppsala	NA	NA	C. officinalis	4	24	26	2	y		59.8594	17.6411	c.e.
00077	Cytological studies in Cochlearia L. (Cruciferae). The origins of C. officinalis L. and C. micaceae Marshall	Gill, J.J.B.	1973		UK	Angus, Scotland; lt. Gill 1978: Carnoustie, Forfar, v.c. 90	NA	NA	C. officinalis	4	24	24	0	n		56.5022	-2.71127	c.e.
00078	Cytological studies in Cochlearia L. (Cruciferae). The origins of C. officinalis L. and C. micaceae Marshall	Gill, J.J.B.	1973		UK	Argyll, Scotland	NA	NA	C. officinalis	4	24	26	2	y		56.2124	-5.52263	c.e.
00079	Cytological studies in Cochlearia L. (Cruciferae). The origins of C. officinalis L. and C. micaceae Marshall	Gill, J.J.B.	1973		UK	Arran, Scotland; lt. Gill 1978: Lamlash, Arran, Clyde Is., v.c. 100	NA	NA	C. officinalis	4	24	25	1	y		55.5351	-5.12742	c.e.
00080	Cytological studies in Cochlearia L. (Cruciferae). The origins of C. officinalis L. and C. micaceae Marshall	Gill, J.J.B.	1973		UK	Banff, Scotland	NA	NA	C. officinalis	4	24	25	1	y		57.6697	-2.52761	c.e.
00081	Cytological studies in Cochlearia L. (Cruciferae). The origins of C. officinalis L. and C. micaceae Marshall	Gill, J.J.B.	1973		UK	Birdsay, Orkney	NA	NA	C. officinalis	4	24	24	0	n		59.1316	-3.31124	c.e.
00082	Cytological studies in Cochlearia L. (Cruciferae). The origins of C. officinalis L. and C. micaceae Marshall	Gill, J.J.B.	1973		UK	Caernavon, Wales; lt. Gill 1978: Caernarvon, Caerns., v.c. 49	NA	NA	C. officinalis	4	24	24	0	n		53.1403	-4.27638	c.e.
00083	Cytological studies in Cochlearia L. (Cruciferae). The origins of C. officinalis L. and C. micaceae Marshall	Gill, J.J.B.	1973		UK	Cheshire, England; lt. Gill 1978: Parkgate, Cheshire, v.c. 58	NA	NA	C. officinalis	4	24	24	0	n		53.2972	-3.08362	c.e.
00084	Cytological studies in Cochlearia L. (Cruciferae). The origins of C. officinalis L. and C. micaceae Marshall	Gill, J.J.B.	1973		UK	Pembrokeshire, Wales; lt. Gill 1978: Hook Farm, Pembs., v.c. 45	NA	NA	C. officinalis	4	24	24	0	n		51.7365	-5.23551	c.e.
00085	Cytological studies in Cochlearia L. (Cruciferae). The origins of C. officinalis L. and C. micaceae Marshall	Gill, J.J.B.	1973		UK	Sky, Scotland; lt. Gill 1978: Coast of Isle of Skye, Mid Ebudes, v.c. 104	NA	NA	C. officinalis	4	24	24	0	n		57.5389	-6.23095	c.e.
00086	Cytological studies in Cochlearia L. (Cruciferae). The origins of C. officinalis L. and C. micaceae Marshall	Gill, J.J.B.	1973		UK	Wick, Scotland; Gill 1978: Wick, Caithness, v.c. 109	NA	NA	C. officinalis	4	24	25	1	y		58.4394	-3.09386	c.e.
00087	Cytological studies in Cochlearia L. (Cruciferae). The origins of C. officinalis L. and C. micaceae Marshall	Gill, J.J.B.	1973		UK	Yecansby, Orkney	NA	NA	C. officinalis	4	24	24	0	n		59.0467	-3.18274	c.e.
00088	Cytological studies in Cochlearia L. (Cruciferae). The origins of C. officinalis L. and C. micaceae Marshall	Gill, J.J.B.	1973		RUS	St. Petersburg	NA	NA	C. officinalis	4	24	24	0	n		59.9391	30.3525	c.e.	1
00089	Cytological studies in Cochlearia L. (Cruciferae). The origins of C. officinalis L. and C. micaceae Marshall	Gill, J.J.B.	1973		RUS	Murmansk	NA	NA	C. officinalis	4	24	25	1	y		68.9575	33.0782	c.e.
00090	Cytological studies in Cochlearia L. (Cruciferae). The origins of C. officinalis L. and C. micaceae Marshall	Gill, J.J.B.	1973		RUS	Vilar	NA	NA	C. officinalis	4	24	28	4	y		55.7056	37.4828	c.e.	1
00091	Cytogenetic studies in Cochlearia L. (Cruciferae). The chromosomal constitution of C. danica L. Genetica 46: 115-127.	Gill, J.J.B.	1976		DK	Copenhagen	NA	NA	C. danica	6	42	42	0	n		55.678	12.6228	c.e.
00092	Cytogenetic studies in Cochlearia L. (Cruciferae). The chromosomal constitution of C. danica L. Genetica 46: 115-127.	Gill, J.J.B.	1976		FIN	Hango	NA	NA	C. danica	6	42	42	0	n		59.8245	22.9308	c.e.
00093	Cytogenetic studies in Cochlearia L. (Cruciferae). The chromosomal constitution of C. danica L. Genetica 46: 115-127.	Gill, J.J.B.	1976		FIN	Langskar	NA	NA	C. danica	6	42	42	0	n		59.8482	22.8546	c.e.
00094	Cytogenetic studies in Cochlearia L. (Cruciferae). The chromosomal constitution of C. danica L. Genetica 46: 115-127.	Gill, J.J.B.	1976		Fr	Dijon	NA	NA	C. danica	6	42	42	0	n		47.3274	5.04028	c.e.
00095	Cytogenetic studies in Cochlearia L. (Cruciferae). The chromosomal constitution of C. danica L. Genetica 46: 115-127.	Gill, J.J.B.	1976		Fr	Grenoble	NA	NA	C. danica	6	42	42	0	n		45.1793	5.70257	c.e.
00096	Cytogenetic studies in Cochlearia L. (Cruciferae). The chromosomal constitution of C. danica L. Genetica 46: 115-127.	Gill, J.J.B.	1976		FR	Nantes	NA	NA	C. danica	6	42	42	0	n		47.2086	-1.54927	c.e.
00097	Cytogenetic studies in Cochlearia L. (Cruciferae). The chromosomal constitution of C. danica L. Genetica 46: 115-127.	Gill, J.J.B.	1976		FR	Rouen	NA	NA	C. danica	6	42	42	0	n		49.4357	1.09619	c.e.
00098	Cytogenetic studies in Cochlearia L. (Cruciferae). The chromosomal constitution of C. danica L. Genetica 46: 115-127.	Gill, J.J.B.	1976		PT	Porto	NA	NA	C. danica	6	42	42	0	n		41.1495	-8.61079	c.e.
00099	Cytogenetic studies in Cochlearia L. (Cruciferae). The chromosomal constitution of C. danica L. Genetica 46: 115-127.	Gill, J.J.B.	1976		SWE	Lund	NA	NA	C. danica	6	42	42	0	n		55.7043	13.1903	c.e.
00100	Cytogenetic studies in Cochlearia L. (Cruciferae). The chromosomal constitution of C. danica L. Genetica 46: 115-127.	Gill, J.J.B.	1976		UK	Alltwen, Wales	NA	NA	C. danica	6	42	42	0	n		51.714	-3.84585	c.e.
00101	Cytogenetic studies in Cochlearia L. (Cruciferae). The chromosomal constitution of C. danica L. Genetica 46: 115-127.	Gill, J.J.B.	1976		UK	Blundellsands, England	NA	NA	C. danica	6	42	42	0	n		53.4899	-3.05056	c.e.
00102	Cytogenetic studies in Cochlearia L. (Cruciferae). The chromosomal constitution of C. danica L. Genetica 46: 115-127.	Gill, J.J.B.	1976		UK	Hoylake, England	NA	NA	C. danica	6	42	42	0	n		53.3899	-3.17881
00103	Cytogenetic studies in Cochlearia L. (Cruciferae). The chromosomal constitution of C. danica L. Genetica 46: 115-127.	Gill, J.J.B.	1976		UK	Lizard, England	NA	NA	C. danica	6	42	42	0	n		49.9688	-5.20392	c.e.
00104	Cytogenetic studies in Cochlearia L. (Cruciferae). The chromosomal constitution of C. danica L. Genetica 46: 115-127.	Gill, J.J.B.	1976		UK	Noss, Shetland	NA	NA	C. danica	6	42	42	0	n		60.1434	-1.01973	c.e.
00105	Cytogenetic studies in Cochlearia L. (Cruciferae). The chromosomal constitution of C. danica L. Genetica 46: 115-127.	Gill, J.J.B.	1976		UK	Port Colman, Wales	NA	NA	C. danica	6	42	42	0	n		52.8752	-4.68413	c.e.
00106	Cytogenetic Studies in Cochlearia L. The chromosomal homogeneity within both the 2n=12 diploids and the 2n=14 diploids and the cytogenetic relationship between the two chromosome levels. Ann Bot. 35, 947-56, 1971.	Gill, J.J.B.	1971		RUS	St. Petersburg	NA	NA	C. arctica	2	14	14	0	n		59.9391	30.3525	c.e.	1
00107	Cytogenetic Studies in Cochlearia L. The chromosomal homogeneity within both the 2n=12 diploids and the 2n=14 diploids and the cytogenetic relationship between the two chromosome levels. Ann Bot. 35, 947-56, 1971.	Gill, J.J.B.	1971		RUS	St. Petersburg No 1161 (1964)	NA	NA	C. arctica	2	14	14	0	n		59.9391	30.3525	c.e.	1
00108	Cytogenetic Studies in Cochlearia L. The chromosomal homogeneity within both the 2n=12 diploids and the 2n=14 diploids and the cytogenetic relationship between the two chromosome levels. Ann Bot. 35, 947-56, 1971.	Gill, J.J.B.	1971		RUS	St. Petersburg No 1162 (1964)	NA	NA	C. arctica	2	14	14	0	n		59.9391	30.3525	c.e.	1
00109	Cytogenetic Studies in Cochlearia L. The chromosomal homogeneity within both the 2n=12 diploids and the 2n=14 diploids and the cytogenetic relationship between the two chromosome levels. Ann Bot. 35, 947-56, 1971.	Gill, J.J.B.	1971		RUS	Moscow, U.S.S.R. 1965	NA	NA	C. arctica	2	14	14	0	n		55.7618	37.6394	c.e.	1
00110	Cytogenetic Studies in Cochlearia L. The chromosomal homogeneity within both the 2n=12 diploids and the 2n=14 diploids and the cytogenetic relationship between the two chromosome levels. Ann Bot. 35, 947-56, 1971.	Gill, J.J.B.	1971		RUS	Peninsula Czukotka, near Lorino, U.S.S.R.	NA	NA	C. arctica	2	14	14	0	n		65.5106	-171.731	c.e.
00111	Cytogenetic Studies in Cochlearia L. The chromosomal homogeneity within both the 2n=12 diploids and the 2n=14 diploids and the cytogenetic relationship between the two chromosome levels. Ann Bot. 35, 947-56, 1971.	Gill, J.J.B.	1971		Bering Sea	St. Lawrence Island, Bering Sea	NA	NA	C. groenlandica	2	14	14	0	n		63.3408	-170.035	c.e.
00112	Cytogenetic Studies in Cochlearia L. The chromosomal homogeneity within both the 2n=12 diploids and the 2n=14 diploids and the cytogenetic relationship between the two chromosome levels. Ann Bot. 35, 947-56, 1971.	Gill, J.J.B.	1971		CAN	Central Axel Hieberg Island, N.W.T. Canada	NA	NA	C. groenlandica	2	14	14	0	n		79.8448	-91.2973	c.e.
00113	Cytogenetic Studies in Cochlearia L. The chromosomal homogeneity within both the 2n=12 diploids and the 2n=14 diploids and the cytogenetic relationship between the two chromosome levels. Ann Bot. 35, 947-56, 1971.	Gill, J.J.B.	1971		CAN	Clinton Point, Mackenzie District, N.W.T. Canada, 69° 35' N, 120° 44' W	NA	NA	C. groenlandica	2	14	14	0	n		69.5833	-120.733
00114	Cytogenetic Studies in Cochlearia L. The chromosomal homogeneity within both the 2n=12 diploids and the 2n=14 diploids and the cytogenetic relationship between the two chromosome levels. Ann Bot. 35, 947-56, 1971.	Gill, J.J.B.	1971		CAN	Cornwallis Island, N.W.T. Canada	NA	NA	C. groenlandica	2	14	14	0	n		75.0963	-95.15	c.e.
00115	Cytogenetic Studies in Cochlearia L. The chromosomal homogeneity within both the 2n=12 diploids and the 2n=14 diploids and the cytogenetic relationship between the two chromosome levels. Ann Bot. 35, 947-56, 1971.	Gill, J.J.B.	1971		CAN	Tuktoyaktuk east of mouth of Mackenzie River, N.W.T. Canada	NA	NA	C. groenlandica	2	14	14	0	n		69.3839	-133.585	c.e.
00116	Cytogenetic Studies in Cochlearia L. The chromosomal homogeneity within both the 2n=12 diploids and the 2n=14 diploids and the cytogenetic relationship between the two chromosome levels. Ann Bot. 35, 947-56, 1971.	Gill, J.J.B.	1971		Greenland	Kronprinsens Ejland, Greenland	NA	NA	C. groenlandica	2	14	14	0	n		68.9917	-53.3454	c.e.
00117	Cytogenetic Studies in Cochlearia L. The chromosomal homogeneity within both the 2n=12 diploids and the 2n=14 diploids and the cytogenetic relationship between the two chromosome levels. Ann Bot. 35, 947-56, 1971.	Gill, J.J.B.	1971		ICE	Stapi, Snafellnes, Iceland C. 25M.A S L	NA	NA	C. groenlandica	2	14	14	0	n		64.7667	-23.6333	c.e.
00118	Cytogenetic Studies in Cochlearia L. The chromosomal homogeneity within both the 2n=12 diploids and the 2n=14 diploids and the cytogenetic relationship between the two chromosome levels. Ann Bot. 35, 947-56, 1971.	Gill, J.J.B.	1971		ICE	Stokkseyri, Arnessysla, Iceland	NA	NA	C. groenlandica	2	14	14	0	n		63.8333	-21.05	c.e.
00119	Cytogenetic Studies in Cochlearia L. The chromosomal homogeneity within both the 2n=12 diploids and the 2n=14 diploids and the cytogenetic relationship between the two chromosome levels. Ann Bot. 35, 947-56, 1971.	Gill, J.J.B.	1971		USA	East of Arctic Research Laboratory, Point Barrow, Alaska, 71° 21' N, 156° 19' W.	NA	NA	C. groenlandica	2	14	14	0	n		71.35	-156.317
00120	Cytogenetic Studies in Cochlearia L. The chromosomal homogeneity within both the 2n=12 diploids and the 2n=14 diploids and the cytogenetic relationship between the two chromosome levels. Ann Bot. 35, 947-56, 1971.	Gill, J.J.B.	1971		USA	Near mouth of Ogotoruk Creek, Cape Thomson, Chukchi Sea, Alaska, 68° 07' N, 165° 55' W.	NA	NA	C. groenlandica	2	14	14	0	n		68.1167	-165.917
00121	Cytogenetic Studies in Cochlearia L. The chromosomal homogeneity within both the 2n=12 diploids and the 2n=14 diploids and the cytogenetic relationship between the two chromosome levels. Ann Bot. 35, 947-56, 1971.	Gill, J.J.B.	1971		USA	Ukinyik Creek, Bering Straits, Alaska	NA	NA	C. groenlandica	2	14	14	0	n		68.7381	-166.097	c.e.
00122	Cytogenetic Studies in Cochlearia L. The chromosomal homogeneity within both the 2n=12 diploids and the 2n=14 diploids and the cytogenetic relationship between the two chromosome levels. Ann Bot. 35, 947-56, 1971.	Gill, J.J.B.	1971		JP	Eastern Hokkaido, Japan	NA	NA	C. oblongifolia	2	14	14	0	n		43.5187	145.055	c.e.
00123	Cytogenetic Studies in Cochlearia L. The chromosomal homogeneity within both the 2n=12 diploids and the 2n=14 diploids and the cytogenetic relationship between the two chromosome levels. Ann Bot. 35, 947-56, 1971.	Gill, J.J.B.	1971		ICE	Ingolfshofli, Austur-Skaftafellssyala, southeast Iceland	NA	NA	C. spec.	2	12	12	0	n		64.0833	-16.122	c.e.
00124	The Cytology and Transmission of Accessory Chromosomes in Cochlearia Pyrenaica DC. (Cruciferae), Caryologia: International Journal of Cytology, Cytosystematics and Cytogenetics, 24:2, 173-181, DOI:10.1080/00087114.1971.10796425	Gill, J.J.B.	1970, 1971		UK	Malham	NA	NA	C. pyrenaica	2	12	12	0	n		54.0607	-2.15368	c.e.
00125	The Cytology and Transmission of Accessory Chromosomes in Cochlearia Pyrenaica DC. (Cruciferae), Caryologia: International Journal of Cytology, Cytosystematics and Cytogenetics, 24:2, 173-181, DOI:10.1080/00087114.1971.10796425	Gill, J.J.B.	1970, 1971		UK	Malham	NA	NA	C. pyrenaica	2	12	13	1	y		54.0607	-2.15368	c.e.
00126	The Cytology and Transmission of Accessory Chromosomes in Cochlearia Pyrenaica DC. (Cruciferae), Caryologia: International Journal of Cytology, Cytosystematics and Cytogenetics, 24:2, 173-181, DOI:10.1080/00087114.1971.10796425	Gill, J.J.B.	1970, 1971		UK	Malham	NA	NA	C. pyrenaica	2	12	14	2	y		54.0607	-2.15368	c.e.
00127	The Cytology and Transmission of Accessory Chromosomes in Cochlearia Pyrenaica DC. (Cruciferae), Caryologia: International Journal of Cytology, Cytosystematics and Cytogenetics, 24:2, 173-181, DOI:10.1080/00087114.1971.10796425	Gill, J.J.B.	1970, 1971		UK	Malham	NA	NA	C. pyrenaica	2	12	15	3	y		54.0607	-2.15368	c.e.
00128	The Cytology and Transmission of Accessory Chromosomes in Cochlearia Pyrenaica DC. (Cruciferae), Caryologia: International Journal of Cytology, Cytosystematics and Cytogenetics, 24:2, 173-181, DOI:10.1080/00087114.1971.10796425	Gill, J.J.B.	1970, 1971		UK	Malham	NA	NA	C. pyrenaica	2	12	16	4	y		54.0607	-2.15368	c.e.
00130	Cytotaxonomic studies on the Cochlearia officinalis L. group from inland stations in Britain. Watsonia,12, 15-21 (1978).	Gill, J.J.B., McAllister, H.A., Fearn, G.M.	1978		UK	Beinn Dearg, W. Ross, v.c. 105	NA	NA	C. micacea	4	26	26	0	n		57.7864	-4.92977	c.e.
00132	Cytotaxonomic studies on the Cochlearia officinalis L. group from inland stations in Britain. Watsonia,12, 15-21 (1978).	Gill, J.J.B., McAllister, H.A., Fearn, G.M.	1978		UK	Black Spout, Lochnagar, S. Aberdeen, v.c. 92	NA	NA	C. officinalis	4	24	24	0	n		56.9568	-3.18925	c.e.
00133	Cytotaxonomic studies on the Cochlearia officinalis L. group from inland stations in Britain. Watsonia,12, 15-21 (1978).	Gill, J.J.B., McAllister, H.A., Fearn, G.M.	1978		UK	Black Spout, Lochnagar, S. Aberdeen, v.c. 92	NA	NA	C. officinalis	4	24	29	0	n		56.9568	-3.18925	c.e.
00134	Cytotaxonomic studies on the Cochlearia officinalis L. group from inland stations in Britain. Watsonia,12, 15-21 (1978).	Gill, J.J.B., McAllister, H.A., Fearn, G.M.	1978		UK	Cheddar Gorge, N. Somerset, v.c. 6	NA	NA	C. officinalis	4	24	24	0	n		51.2864	-2.7603	c.e.
00135	Cytotaxonomic studies on the Cochlearia officinalis L. group from inland stations in Britain. Watsonia,12, 15-21 (1978).	Gill, J.J.B., McAllister, H.A., Fearn, G.M.	1978		UK	Clogwyn y Garnedd, Snowdon, Caerns., v.c. 49	NA	NA	C. officinalis	4	24	24	0	n		53.0695	-4.0766	c.e.
00136	Cytotaxonomic studies on the Cochlearia officinalis L. group from inland stations in Britain. Watsonia,12, 15-21 (1978).	Gill, J.J.B., McAllister, H.A., Fearn, G.M.	1978		UK	Clogwyn y Garnedd, Snowdon, Caerns., v.c. 49	NA	NA	C. officinalis	4	24	25	1	y		53.0695	-4.0766	c.e.
00137	Cytotaxonomic studies on the Cochlearia officinalis L. group from inland stations in Britain. Watsonia,12, 15-21 (1978).	Gill, J.J.B., McAllister, H.A., Fearn, G.M.	1978		UK	Clogwyn y Garnedd, Snowdon, Caerns., v.c. 49	NA	NA	C. officinalis	4	24	26	2	y		53.0695	-4.0766	c.e.
00138	Cytotaxonomic studies on the Cochlearia officinalis L. group from inland stations in Britain. Watsonia,12, 15-21 (1978).	Gill, J.J.B., McAllister, H.A., Fearn, G.M.	1978		UK	Clogwyn y Garnedd, Snowdon, Caerns., v.c. 49	NA	NA	C. officinalis	4	24	27	3	y		53.0695	-4.0766	c.e.
00139	Cytotaxonomic studies on the Cochlearia officinalis L. group from inland stations in Britain. Watsonia,12, 15-21 (1978).	Gill, J.J.B., McAllister, H.A., Fearn, G.M.	1978		UK	Coire an t'Sneachda, Cairngorm, Westerness, v.c. 97	NA	NA	C. officinalis	4	24	25	1	y		57.1132	-3.6642	c.e.
00140	Cytotaxonomic studies on the Cochlearia officinalis L. group from inland stations in Britain. Watsonia,12, 15-21 (1978).	Gill, J.J.B., McAllister, H.A., Fearn, G.M.	1978		UK	Coire an t'Sneachda, Cairngorm, Westerness, v.c. 97	NA	NA	C. officinalis	4	24	26	2	y		57.1132	-3.6642	c.e.
00141	Cytotaxonomic studies on the Cochlearia officinalis L. group from inland stations in Britain. Watsonia,12, 15-21 (1978).	Gill, J.J.B., McAllister, H.A., Fearn, G.M.	1978		UK	Coire Cruitein, Beinn Dorain, Main Argyll, v.c. 98	NA	NA	C. officinalis	4	24	28	4	y		56.5069	-4.71677	c.e.
00142	Cytotaxonomic studies on the Cochlearia officinalis L. group from inland stations in Britain. Watsonia,12, 15-21 (1978).	Gill, J.J.B., McAllister, H.A., Fearn, G.M.	1978		UK	Coire Cruitein, Beinn Dorain, Main Argyll, v.c. 98	NA	NA	C. officinalis	4	24	29	5	y		56.5069	-4.71677	c.e.
00143	Cytotaxonomic studies on the Cochlearia officinalis L. group from inland stations in Britain. Watsonia,12, 15-21 (1978).	Gill, J.J.B., McAllister, H.A., Fearn, G.M.	1978		UK	Tom na Gruagaich, Beinn Alligin, W. Ross., v.c. 105	NA	NA	C. officinalis	4	24	24	0	n		57.5805	-5.58195	c.e.
00144	Cytotaxonomic studies on the Cochlearia officinalis L. group from inland stations in Britain. Watsonia,12, 15-21 (1978).	Gill, J.J.B., McAllister, H.A., Fearn, G.M.	1978		UK	Tom na Gruagaich, Beinn Alligin, W. Ross., v.c. 105	NA	NA	C. officinalis	4	24	25	1	y		57.5805	-5.58195	c.e.
00145	Cytotaxonomic studies on the Cochlearia officinalis L. group from inland stations in Britain. Watsonia,12, 15-21 (1978).	Gill, J.J.B., McAllister, H.A., Fearn, G.M.	1978		UK	Tom na Gruagaich, Beinn Alligin, W. Ross., v.c. 105	NA	NA	C. officinalis	4	24	26	2	y		57.5805	-5.58195	c.e.
00146	Cytotaxonomic studies on the Cochlearia officinalis L. group from inland stations in Britain. Watsonia,12, 15-21 (1978).	Gill, J.J.B., McAllister, H.A., Fearn, G.M.	1978		UK	Dirtlow Rake, Derbys., v.c. 57	NA	NA	C. pyrenaica	2	12	12	0	n		53.3321	-1.77879	c.e.
00147	Cytotaxonomic studies on the Cochlearia officinalis L. group from inland stations in Britain. Watsonia,12, 15-21 (1978).	Gill, J.J.B., McAllister, H.A., Fearn, G.M.	1978		UK	Entwistle, S. Lancs., v.c. 59	NA	NA	C. pyrenaica	2	12	12	0	n		53.6538	-2.41135	c.e.
00148	Cytotaxonomic studies on the Cochlearia officinalis L. group from inland stations in Britain. Watsonia,12, 15-21 (1978).	Gill, J.J.B., McAllister, H.A., Fearn, G.M.	1978		UK	Entwistle, S. Lancs., v.c. 59	NA	NA	C. pyrenaica	2	12	14	2	y		53.6538	-2.41135	c.e.
00149	Cytotaxonomic studies on the Cochlearia officinalis L. group from inland stations in Britain. Watsonia,12, 15-21 (1978).	Gill, J.J.B., McAllister, H.A., Fearn, G.M.	1978		UK	Grassington, Mid-W. Yorks., v.c. 64	NA	NA	C. pyrenaica	2	12	12	0	n		54.073	-1.99783	c.e.
00150	Cytotaxonomic studies on the Cochlearia officinalis L. group from inland stations in Britain. Watsonia,12, 15-21 (1978).	Gill, J.J.B., McAllister, H.A., Fearn, G.M.	1978		UK	Green Castle, Westmorland, v.c. 69	NA	NA	C. pyrenaica	2	12	12	0	n		54.6745	-2.44657	c.e.
00151	Cytotaxonomic studies on the Cochlearia officinalis L. group from inland stations in Britain. Watsonia,12, 15-21 (1978).	Gill, J.J.B., McAllister, H.A., Fearn, G.M.	1978		UK	Teesdale, Durham, v.c. 66	NA	NA	C. pyrenaica	2	12	12	0	n		54.6044	-2.01423	c.e.
00152	Cytotaxonomic studies on the Cochlearia officinalis L. group from inland stations in Britain. Watsonia,12, 15-21 (1978).	Gill, J.J.B., McAllister, H.A., Fearn, G.M.	1978		UK	Tynehead, Durham, v.c. 66	NA	NA	C. pyrenaica	2	12	12	0	n		54.7155	-2.3652	c.e.
00153	Cytotaxonomic studies on the Cochlearia officinalis L. group from inland stations in Britain. Watsonia,12, 15-21 (1978).	Gill, J.J.B., McAllister, H.A., Fearn, G.M.	1978		UK	Woodall, N.W. Yorks., v.c. 65	NA	NA	C. pyrenaica	2	12	12	0	n		54.3608	-2.25199	c.e.
00155	Cytological studies in the flora of Peary Land, North Greenland. - Medd. Gronl, 128, 5: 1-40.	Holmen	1952	Saunte 1955	GRÖ	Pearyland, N. Greenland	NA	NA	C. officinalis var. groenlandica	2	14	15	1	y		82.6986	-34.2945	c.e.
00157	The chromosome number of Cochlearia pyrenaica DC. near Moresnet (Belgium)	Kakes	1973	Vogt 1987	BEL	Belgien: Province de Liége; bei Moresnet	NA	NA	C. pyrenaica	2	12	12	0	n		50.7	6	c.e.
00158	Chloroplast DNA restriction site variation and RAPD-analyses in Cochlearia (Brassicaceae). Biosystematics and speciation processes. Nord J Bot 16(6):585–604	Koch M., Hurka, H., Mummenhoff, K.	1996		PL	original wild location: near Olkusz in southern Poland, flooded banks of the upper Biała river (ext. 1994); then prob. Centuria river 50o2500400N 19o2902900E <=look up in paper	NA	NA	C. polonica	6	24	36	12	y		50.2833	19.55
00159	Chloroplast DNA restriction site variation and RAPD-analyses in Cochlearia (Brassicaceae): Biosystematics and speciation. Nord. J. Bot. 16(6) 1996	Koch, M., Hurka, H., Mummenhoff, K.	1996		ES	Tinamayor near Unquera, Cantabria, Spain	NA	NA	C. aestuaria	2	12	12	0	n		43.45	-4.55
00160	Chloroplast DNA restriction site variation and RAPD-analyses in Cochlearia (Brassicaceae): Biosystematics and speciation. Nord. J. Bot. 16(6) 1996	Koch, M., Hurka, H., Mummenhoff, K.	1996		ES	Villaviciosa, Asturia, Spain	NA	NA	C. aestuaria	2	12	12	0	n		43.5667	-5.45
00161	Chloroplast DNA restriction site variation and RAPD-analyses in Cochlearia (Brassicaceae): Biosystematics and speciation. Nord. J. Bot. 16(6) 1996	Koch, M., Hurka, H., Mummenhoff, K.	1996		DK	Ølsemagle, Revle, Denmark	NA	NA	C. anglica	8	48	48	0	n		55.5	12.25
00162	Chloroplast DNA restriction site variation and RAPD-analyses in Cochlearia (Brassicaceae): Biosystematics and speciation. Nord. J. Bot. 16(6) 1996	Koch, M., Hurka, H., Mummenhoff, K.	1996		DK	Samsø, Denmark	NA	NA	C. anglica	8	48	48	0	n		55.9167	10.5167
00163	Chloroplast DNA restriction site variation and RAPD-analyses in Cochlearia (Brassicaceae): Biosystematics and speciation. Nord. J. Bot. 16(6) 1996	Koch, M., Hurka, H., Mummenhoff, K.	1996		DK	Staunings, Denmark	NA	NA	C. anglica	8	48	48	0	n		55.4833	12.2333
00164	Chloroplast DNA restriction site variation and RAPD-analyses in Cochlearia (Brassicaceae): Biosystematics and speciation. Nord. J. Bot. 16(6) 1996	Koch, M., Hurka, H., Mummenhoff, K.	1996		FR	Salanelles, France	NA	NA	C. anglica	8	48	48	0	n		49.35	-0.216667
00165	Chloroplast DNA restriction site variation and RAPD-analyses in Cochlearia (Brassicaceae): Biosystematics and speciation. Nord. J. Bot. 16(6) 1996	Koch, M., Hurka, H., Mummenhoff, K.	1996		FR	Salanelles, France	NA	NA	C. anglica	8	48	48	0	n		49.2667	-0.216667
00166	Chloroplast DNA restriction site variation and RAPD-analyses in Cochlearia (Brassicaceae): Biosystematics and speciation. Nord. J. Bot. 16(6) 1996	Koch, M., Hurka, H., Mummenhoff, K.	1996		GER	Dornumer Siel, Germany	NA	NA	C. anglica	8	48	48	0	n		53.6833	7.46667
00167	Chloroplast DNA restriction site variation and RAPD-analyses in Cochlearia (Brassicaceae): Biosystematics and speciation. Nord. J. Bot. 16(6) 1996	Koch, M., Hurka, H., Mummenhoff, K.	1996		GER	Elisabethgroden, Germany	NA	NA	C. anglica	8	48	48	0	n		53.7	7.91667
00173	Chloroplast DNA restriction site variation and RAPD-analyses in Cochlearia (Brassicaceae): Biosystematics and speciation. Nord. J. Bot. 16(6) 1996	Koch, M., Hurka, H., Mummenhoff, K.	1996		GER	Eßmühle near Unteregg, Bavaria, Germany	NA	NA	C. bavarica	6	36	36	0	n		47.9667	10.45
00174	Chloroplast DNA restriction site variation and RAPD-analyses in Cochlearia (Brassicaceae): Biosystematics and speciation. Nord. J. Bot. 16(6) 1996	Koch, M., Hurka, H., Mummenhoff, K.	1996		GER	Friesenried near Kaufbeuren, Bavaria, Germany	NA	NA	C. bavarica	6	36	36	0	n		47.8833	10.5333
00175	Chloroplast DNA restriction site variation and RAPD-analyses in Cochlearia (Brassicaceae): Biosystematics and speciation. Nord. J. Bot. 16(6) 1996	Koch, M., Hurka, H., Mummenhoff, K.	1996		GER	Gfäll near Ebersbach, Bavaria, Germany	NA	NA	C. bavarica	6	36	36	0	n		47.8833	10.45
00176	Chloroplast DNA restriction site variation and RAPD-analyses in Cochlearia (Brassicaceae): Biosystematics and speciation. Nord. J. Bot. 16(6) 1996	Koch, M., Hurka, H., Mummenhoff, K.	1996		GER	Glonn, Bavaria, Germany	NA	NA	C. bavarica	6	36	36	0	n		47.9833	11.8667
00177	Chloroplast DNA restriction site variation and RAPD-analyses in Cochlearia (Brassicaceae): Biosystematics and speciation. Nord. J. Bot. 16(6) 1996	Koch, M., Hurka, H., Mummenhoff, K.	1996		GER	Immenthal near Obergünzburg, Bavaria, Germany	NA	NA	C. bavarica	6	36	36	0	n		47.7833	10.3667
00178	Chloroplast DNA restriction site variation and RAPD-analyses in Cochlearia (Brassicaceae): Biosystematics and speciation. Nord. J. Bot. 16(6) 1996	Koch, M., Hurka, H., Mummenhoff, K.	1996		GER	Klessen near Dietratried, Bavaria, Germany	NA	NA	C. bavarica	6	36	36	0	n		47.9167	10.25
00180	Chloroplast DNA restriction site variation and RAPD-analyses in Cochlearia (Brassicaceae): Biosystematics and speciation. Nord. J. Bot. 16(6) 1996	Koch, M., Hurka, H., Mummenhoff, K.	1996		GER	Ollarzried, Bavaria, Germany	NA	NA	C. bavarica	6	36	36	0	n		47.9	10.35
00181	Chloroplast DNA restriction site variation and RAPD-analyses in Cochlearia (Brassicaceae): Biosystematics and speciation. Nord. J. Bot. 16(6) 1996	Koch, M., Hurka, H., Mummenhoff, K.	1996		GER	Stoßberg near Untrasried, Bavaria, Germany	NA	NA	C. bavarica	6	36	36	0	n		47.8167	10.35
00182	Chloroplast DNA restriction site variation and RAPD-analyses in Cochlearia (Brassicaceae): Biosystematics and speciation. Nord. J. Bot. 16(6) 1996	Koch, M., Hurka, H., Mummenhoff, K.	1996		GER	Thalham north Halfing, Bavaria, Germany	NA	NA	C. bavarica	6	36	36	0	n		47.9667	12.3
00183	Chloroplast DNA restriction site variation and RAPD-analyses in Cochlearia (Brassicaceae): Biosystematics and speciation. Nord. J. Bot. 16(6) 1996	Koch, M., Hurka, H., Mummenhoff, K.	1996		GER	Vagen near Bruckmühl, Bavaria, Germany	NA	NA	C. bavarica	6	36	36	0	n		47.8667	11.8833
00184	Chloroplast DNA restriction site variation and RAPD-analyses in Cochlearia (Brassicaceae): Biosystematics and speciation. Nord. J. Bot. 16(6) 1996	Koch, M., Hurka, H., Mummenhoff, K.	1996		GER	Zadels, east of Ollarzried, Bavaria, Germany	NA	NA	C. bavarica	6	36	36	0	n		47.9	10.3833
00185	Chloroplast DNA restriction site variation and RAPD-analyses in Cochlearia (Brassicaceae): Biosystematics and speciation. Nord. J. Bot. 16(6) 1996	Koch, M., Hurka, H., Mummenhoff, K.	1996		DK	Christiansø, Denmark	NA	NA	C. danica	6	42	42	0	n		55.3333	15.1
00186	Chloroplast DNA restriction site variation and RAPD-analyses in Cochlearia (Brassicaceae): Biosystematics and speciation. Nord. J. Bot. 16(6) 1996	Koch, M., Hurka, H., Mummenhoff, K.	1996		DK	Reersø, Denmark	NA	NA	C. danica	6	42	42	0	n		55.5	11.1167
00187	Chloroplast DNA restriction site variation and RAPD-analyses in Cochlearia (Brassicaceae): Biosystematics and speciation. Nord. J. Bot. 16(6) 1996	Koch, M., Hurka, H., Mummenhoff, K.	1996		EST	Vilsandi Island, Saaremaa District, Republic of Estonia	NA	NA	C. danica	6	42	42	0	n		58.1667	21.8
00188	Chloroplast DNA restriction site variation and RAPD-analyses in Cochlearia (Brassicaceae): Biosystematics and speciation. Nord. J. Bot. 16(6) 1996	Koch, M., Hurka, H., Mummenhoff, K.	1996		FR	Boulogne-sur-Mer, France	NA	NA	C. danica	6	42	42	0	n		50.7333	1.5
00189	Chloroplast DNA restriction site variation and RAPD-analyses in Cochlearia (Brassicaceae): Biosystematics and speciation. Nord. J. Bot. 16(6) 1996	Koch, M., Hurka, H., Mummenhoff, K.	1996		FR	Caen, France	NA	NA	C. danica	6	42	42	0	n		49.3333	-0.25
00190	Chloroplast DNA restriction site variation and RAPD-analyses in Cochlearia (Brassicaceae): Biosystematics and speciation. Nord. J. Bot. 16(6) 1996	Koch, M., Hurka, H., Mummenhoff, K.	1996		FR	Flamanville, France	NA	NA	C. danica	6	42	42	0	n		49.5333	-1.88333
00191	Chloroplast DNA restriction site variation and RAPD-analyses in Cochlearia (Brassicaceae): Biosystematics and speciation. Nord. J. Bot. 16(6) 1996	Koch, M., Hurka, H., Mummenhoff, K.	1996		FR	Flamanville, France	NA	NA	C. danica	6	42	42	0	n		49.5333	-1.88333
00192	Chloroplast DNA restriction site variation and RAPD-analyses in Cochlearia (Brassicaceae): Biosystematics and speciation. Nord. J. Bot. 16(6) 1996	Koch, M., Hurka, H., Mummenhoff, K.	1996		FR	Gateville, France	NA	NA	C. danica	6	42	42	0	n		49.6833	-1.26667
00193	Chloroplast DNA restriction site variation and RAPD-analyses in Cochlearia (Brassicaceae): Biosystematics and speciation. Nord. J. Bot. 16(6) 1996	Koch, M., Hurka, H., Mummenhoff, K.	1996		FR	Gatteville, France	NA	NA	C. danica	6	42	42	0	n		49.6833	-1.26667
00194	Chloroplast DNA restriction site variation and RAPD-analyses in Cochlearia (Brassicaceae): Biosystematics and speciation. Nord. J. Bot. 16(6) 1996	Koch, M., Hurka, H., Mummenhoff, K.	1996		FR	Roscoff, France	NA	NA	C. danica	6	42	42	0	n		48.7	-4
00195	Chloroplast DNA restriction site variation and RAPD-analyses in Cochlearia (Brassicaceae): Biosystematics and speciation. Nord. J. Bot. 16(6) 1996	Koch, M., Hurka, H., Mummenhoff, K.	1996		FR	Saint-Gildas de Rhuys, France	NA	NA	C. danica	6	42	42	0	n		47.5	-2.83333
00196	Chloroplast DNA restriction site variation and RAPD-analyses in Cochlearia (Brassicaceae): Biosystematics and speciation. Nord. J. Bot. 16(6) 1996	Koch, M., Hurka, H., Mummenhoff, K.	1996		FR	Tregastel, France	NA	NA	C. danica	6	42	42	0	n		48.8333	-3.6
00197	Chloroplast DNA restriction site variation and RAPD-analyses in Cochlearia (Brassicaceae): Biosystematics and speciation. Nord. J. Bot. 16(6) 1996	Koch, M., Hurka, H., Mummenhoff, K.	1996		FR	Winnereux near Calais, France	NA	NA	C. danica	6	42	42	0	n		50.95	1.83333
00198	Chloroplast DNA restriction site variation and RAPD-analyses in Cochlearia (Brassicaceae): Biosystematics and speciation. Nord. J. Bot. 16(6) 1996	Koch, M., Hurka, H., Mummenhoff, K.	1996		GER	Baltrum, Lower Saxony, Germany	NA	NA	C. danica	6	42	42	0	n		53.7333	7.41667
00199	Chloroplast DNA restriction site variation and RAPD-analyses in Cochlearia (Brassicaceae): Biosystematics and speciation. Nord. J. Bot. 16(6) 1996	Koch, M., Hurka, H., Mummenhoff, K.	1996		GER	Borkum, Eastern Island, Lower Saxony, Germany	NA	NA	C. danica	6	42	42	0	n		53.6	6.83333
00200	Chloroplast DNA restriction site variation and RAPD-analyses in Cochlearia (Brassicaceae): Biosystematics and speciation. Nord. J. Bot. 16(6) 1996	Koch, M., Hurka, H., Mummenhoff, K.	1996		GER	Borkum, Western Island, Lower Saxony, Germany	NA	NA	C. danica	6	42	42	0	n		53.58	6.65
00201	Chloroplast DNA restriction site variation and RAPD-analyses in Cochlearia (Brassicaceae): Biosystematics and speciation. Nord. J. Bot. 16(6) 1996	Koch, M., Hurka, H., Mummenhoff, K.	1996		GER	Motorway 30 Bad Nenndorf, Lower Saxony, Germany	NA	NA	C. danica	6	42	42	0	n		52.35	9.41667
00202	Chloroplast DNA restriction site variation and RAPD-analyses in Cochlearia (Brassicaceae): Biosystematics and speciation. Nord. J. Bot. 16(6) 1996	Koch, M., Hurka, H., Mummenhoff, K.	1996		GER	Motorway 30 Rödinghausen, Lower Saxony, Germany	NA	NA	C. danica	6	42	42	0	n		52.2	8.5
00203	Chloroplast DNA restriction site variation and RAPD-analyses in Cochlearia (Brassicaceae): Biosystematics and speciation. Nord. J. Bot. 16(6) 1996	Koch, M., Hurka, H., Mummenhoff, K.	1996		GER	Norderney, Lower Saxony, Germany	NA	NA	C. danica	6	42	42	0	n		53.7333	7.16667
00204	Chloroplast DNA restriction site variation and RAPD-analyses in Cochlearia (Brassicaceae): Biosystematics and speciation. Nord. J. Bot. 16(6) 1996	Koch, M., Hurka, H., Mummenhoff, K.	1996		GER	Sylt, Lower Saxony, Germany	NA	NA	C. danica	6	42	42	0	n		55	8.26667
00205	Chloroplast DNA restriction site variation and RAPD-analyses in Cochlearia (Brassicaceae): Biosystematics and speciation. Nord. J. Bot. 16(6) 1996	Koch, M., Hurka, H., Mummenhoff, K.	1996		NL	Callantsoog, Western Frisia, Netherlands	NA	NA	C. danica	6	42	42	0	n		52.8333	4.65
00206	Chloroplast DNA restriction site variation and RAPD-analyses in Cochlearia (Brassicaceae): Biosystematics and speciation. Nord. J. Bot. 16(6) 1996	Koch, M., Hurka, H., Mummenhoff, K.	1996		PT	Farilhöes, Arg da Berlenga, Portugal	NA	NA	C. danica	6	42	42	0	n		39.4833	-9.18333
00207	Chloroplast DNA restriction site variation and RAPD-analyses in Cochlearia (Brassicaceae): Biosystematics and speciation. Nord. J. Bot. 16(6) 1996	Koch, M., Hurka, H., Mummenhoff, K.	1996		PT	Ilhen Cerco da Velha, Arg da Berlenga, Portugal	NA	NA	C. danica	6	42	42	0	n		39.4667	-9.13333
00208	Chloroplast DNA restriction site variation and RAPD-analyses in Cochlearia (Brassicaceae): Biosystematics and speciation. Nord. J. Bot. 16(6) 1996	Koch, M., Hurka, H., Mummenhoff, K.	1996		UK	Bornholm, Denmark	NA	NA	C. danica	6	42	42	0	n		55	15
00217	Chloroplast DNA restriction site variation and RAPD-analyses in Cochlearia (Brassicaceae): Biosystematics and speciation. Nord. J. Bot. 16(6) 1996	Koch, M., Hurka, H., Mummenhoff, K.	1996		ICE	Stokkseyri, Iceland	NA	NA	C. groenlandica	2	14	14	0	n		63.8333	-21.05
00219	Chloroplast DNA restriction site variation and RAPD-analyses in Cochlearia (Brassicaceae): Biosystematics and speciation. Nord. J. Bot. 16(6) 1996	Koch, M., Hurka, H., Mummenhoff, K.	1996		AT	Moosbrunn near Wien, Austria	NA	NA	C. macrorrhiza	2	12	12	0	n		48.0333	16.1167
00221	Chloroplast DNA restriction site variation and RAPD-analyses in Cochlearia (Brassicaceae): Biosystematics and speciation. Nord. J. Bot. 16(6) 1996	Koch, M., Hurka, H., Mummenhoff, K.	1996		DK	Allerup, Denmark	NA	NA	C. officinalis	4	24	24	0	n		55.85	12
00222	Chloroplast DNA restriction site variation and RAPD-analyses in Cochlearia (Brassicaceae): Biosystematics and speciation. Nord. J. Bot. 16(6) 1996	Koch, M., Hurka, H., Mummenhoff, K.	1996		DK	Enebærreodde, Denmark	NA	NA	C. officinalis	4	24	24	0	n		55.5167	10.55
00223	Chloroplast DNA restriction site variation and RAPD-analyses in Cochlearia (Brassicaceae): Biosystematics and speciation. Nord. J. Bot. 16(6) 1996	Koch, M., Hurka, H., Mummenhoff, K.	1996		DK	Hirtshals, Denmark	NA	NA	C. officinalis	4	24	24	0	n		57.5833	9.96667
00224	Chloroplast DNA restriction site variation and RAPD-analyses in Cochlearia (Brassicaceae): Biosystematics and speciation. Nord. J. Bot. 16(6) 1996	Koch, M., Hurka, H., Mummenhoff, K.	1996		DK	Ingstrup, N. Jutland, Denmark	NA	NA	C. officinalis	4	24	24	0	n		57.3833	9.66667
00225	Chloroplast DNA restriction site variation and RAPD-analyses in Cochlearia (Brassicaceae): Biosystematics and speciation. Nord. J. Bot. 16(6) 1996	Koch, M., Hurka, H., Mummenhoff, K.	1996		DK	Udby Vig, Denmark	NA	NA	C. officinalis	4	24	24	0	n		55.4	11.1667
00226	Chloroplast DNA restriction site variation and RAPD-analyses in Cochlearia (Brassicaceae): Biosystematics and speciation. Nord. J. Bot. 16(6) 1996	Koch, M., Hurka, H., Mummenhoff, K.	1996		NOR	Feigum, Sognefjord, Norway	NA	NA	C. officinalis	4	24	24	0	n		61.5	7.5
00227	Chloroplast DNA restriction site variation and RAPD-analyses in Cochlearia (Brassicaceae): Biosystematics and speciation. Nord. J. Bot. 16(6) 1996	Koch, M., Hurka, H., Mummenhoff, K.	1996		NOR	Larvik, Oslofjord, Norway	NA	NA	C. officinalis	4	24	24	0	n		59.05	10.0333
00228	Chloroplast DNA restriction site variation and RAPD-analyses in Cochlearia (Brassicaceae): Biosystematics and speciation. Nord. J. Bot. 16(6) 1996	Koch, M., Hurka, H., Mummenhoff, K.	1996		NOR	Røra, Trondheim-fjord, Norway	NA	NA	C. officinalis	4	24	24	0	n		63.8667	11.35
00229	Chloroplast DNA restriction site variation and RAPD-analyses in Cochlearia (Brassicaceae): Biosystematics and speciation. Nord. J. Bot. 16(6) 1996	Koch, M., Hurka, H., Mummenhoff, K.	1996		NOR	Sør-Varanger near Bugøynnes, Norway	NA	NA	C. officinalis	4	24	24	0	n		69.9667	29.5333
00230	Chloroplast DNA restriction site variation and RAPD-analyses in Cochlearia (Brassicaceae): Biosystematics and speciation. Nord. J. Bot. 16(6) 1996	Koch, M., Hurka, H., Mummenhoff, K.	1996		NOR	Stjørdal, Trondheimsfjord, Norway	NA	NA	C. officinalis	4	24	24	0	n		63.4667	10.85
00231	Chloroplast DNA restriction site variation and RAPD-analyses in Cochlearia (Brassicaceae): Biosystematics and speciation. Nord. J. Bot. 16(6) 1996	Koch, M., Hurka, H., Mummenhoff, K.	1996		NOR	Vararger, Hamningberg, Norway	NA	NA	C. officinalis	4	24	24	0	n		70.5333	30.55
00232	Chloroplast DNA restriction site variation and RAPD-analyses in Cochlearia (Brassicaceae): Biosystematics and speciation. Nord. J. Bot. 16(6) 1996	Koch, M., Hurka, H., Mummenhoff, K.	1996		UK	Achmelvich, near Lochinver, Great Britain	NA	NA	C. officinalis	4	24	24	0	n		58.1667	-5.3
00233	Chloroplast DNA restriction site variation and RAPD-analyses in Cochlearia (Brassicaceae): Biosystematics and speciation. Nord. J. Bot. 16(6) 1996	Koch, M., Hurka, H., Mummenhoff, K.	1996		UK	Cromarthy Firth, Ross, Great Britain	NA	NA	C. officinalis	4	24	24	0	n		57.6167	-4.38333
00234	Chloroplast DNA restriction site variation and RAPD-analyses in Cochlearia (Brassicaceae): Biosystematics and speciation. Nord. J. Bot. 16(6) 1996	Koch, M., Hurka, H., Mummenhoff, K.	1996		UK	Doornie, near Loch Alsh, Great Britain	NA	NA	C. officinalis	4	24	24	0	n		57.6	-5.51667
00235	Chloroplast DNA restriction site variation and RAPD-analyses in Cochlearia (Brassicaceae): Biosystematics and speciation. Nord. J. Bot. 16(6) 1996	Koch, M., Hurka, H., Mummenhoff, K.	1996		UK	Dunvegan Castle, Skye, Great Britain	NA	NA	C. officinalis	4	24	24	0	n		57.5667	-6.58333
00236	Chloroplast DNA restriction site variation and RAPD-analyses in Cochlearia (Brassicaceae): Biosystematics and speciation. Nord. J. Bot. 16(6) 1996	Koch, M., Hurka, H., Mummenhoff, K.	1996		UK	Edinbane, Skye, Great Britain	NA	NA	C. officinalis	4	24	24	0	n		57.5	-6.45
00237	Chloroplast DNA restriction site variation and RAPD-analyses in Cochlearia (Brassicaceae): Biosystematics and speciation. Nord. J. Bot. 16(6) 1996	Koch, M., Hurka, H., Mummenhoff, K.	1996		UK	Inverewe Gardens, Loch Ewe, Great Britain	NA	NA	C. officinalis	4	24	24	0	n		57.7833	-5.6
00238	Chloroplast DNA restriction site variation and RAPD-analyses in Cochlearia (Brassicaceae): Biosystematics and speciation. Nord. J. Bot. 16(6) 1996	Koch, M., Hurka, H., Mummenhoff, K.	1996		UK	Inverkeithing, near Edinburgh, Great Britain	NA	NA	C. officinalis	4	24	24	0	n		56.0333	-3.41667
00239	Chloroplast DNA restriction site variation and RAPD-analyses in Cochlearia (Brassicaceae): Biosystematics and speciation. Nord. J. Bot. 16(6) 1996	Koch, M., Hurka, H., Mummenhoff, K.	1996		UK	Littleferry, near Golspie, Great Britain	NA	NA	C. officinalis	4	24	24	0	n		57.95	-4
00240	Chloroplast DNA restriction site variation and RAPD-analyses in Cochlearia (Brassicaceae): Biosystematics and speciation. Nord. J. Bot. 16(6) 1996	Koch, M., Hurka, H., Mummenhoff, K.	1996		UK	Malham, Yorkshire, Great Britain	NA	NA	C. officinalis	4	24	24	0	n		54.0667	-2.15
00241	Chloroplast DNA restriction site variation and RAPD-analyses in Cochlearia (Brassicaceae): Biosystematics and speciation. Nord. J. Bot. 16(6) 1996	Koch, M., Hurka, H., Mummenhoff, K.	1996		UK	Stainforth, Yorkshire, Great Britain	NA	NA	C. officinalis	4	24	24	0	n		54.0833	-2.26667
00242	Chloroplast DNA restriction site variation and RAPD-analyses in Cochlearia (Brassicaceae): Biosystematics and speciation. Nord. J. Bot. 16(6) 1996	Koch, M., Hurka, H., Mummenhoff, K.	1996		UK	Ullapool, Loch Broom, Great Britain	NA	NA	C. officinalis	4	24	24	0	n		57.8958	-5.16142	c.e.
00243	Chloroplast DNA restriction site variation and RAPD-analyses in Cochlearia (Brassicaceae): Biosystematics and speciation. Nord. J. Bot. 16(6) 1996	Koch, M., Hurka, H., Mummenhoff, K.	1996		NOR	Birtavarre, Kåfjord, Norway	NA	NA	C. officinalis ssp. norvegica	4	24	24	0	n		69.5	20.8
00244	Chloroplast DNA restriction site variation and RAPD-analyses in Cochlearia (Brassicaceae): Biosystematics and speciation. Nord. J. Bot. 16(6) 1996	Koch, M., Hurka, H., Mummenhoff, K.	1996		NOR	Isfjorden, Romsdalfjord, Norway	NA	NA	C. officinalis ssp. norvegica	4	24	24	0	n		62.5833	7.76667
00245	Chloroplast DNA restriction site variation and RAPD-analyses in Cochlearia (Brassicaceae): Biosystematics and speciation. Nord. J. Bot. 16(6) 1996	Koch, M., Hurka, H., Mummenhoff, K.	1996		PL	Pustynia Bledowska near Olkusz, Poland	NA	NA	C. polonica	6	36	36	0	n		50.2833	19.55
00246	Chloroplast DNA restriction site variation and RAPD-analyses in Cochlearia (Brassicaceae): Biosystematics and speciation. Nord. J. Bot. 16(6) 1996	Koch, M., Hurka, H., Mummenhoff, K.	1996		BEL	Kelmis, Belgium	NA	NA	C. pyrenaica	2	12	12	0	n		50.7	6
00247	Chloroplast DNA restriction site variation and RAPD-analyses in Cochlearia (Brassicaceae): Biosystematics and speciation. Nord. J. Bot. 16(6) 1996	Koch, M., Hurka, H., Mummenhoff, K.	1996		GER	Einbeck, near Ilmendorf, Bavaria, Germany	NA	NA	C. pyrenaica	2	12	12	0	n		48.75	11.6667
00248	Chloroplast DNA restriction site variation and RAPD-analyses in Cochlearia (Brassicaceae): Biosystematics and speciation. Nord. J. Bot. 16(6) 1996	Koch, M., Hurka, H., Mummenhoff, K.	1996		GER	Horgau, near Hainhofen, Bavaria, Germany	NA	NA	C. pyrenaica	2	12	12	0	n		48.3833	10.7
00249	Chloroplast DNA restriction site variation and RAPD-analyses in Cochlearia (Brassicaceae): Biosystematics and speciation. Nord. J. Bot. 16(6) 1996	Koch, M., Hurka, H., Mummenhoff, K.	1996		GER	Oberalme, North Rhine-Westphalia, Germany	NA	NA	C. pyrenaica	2	12	12	0	n		51.45	8.61667
00250	Chloroplast DNA restriction site variation and RAPD-analyses in Cochlearia (Brassicaceae): Biosystematics and speciation. Nord. J. Bot. 16(6) 1996	Koch, M., Hurka, H., Mummenhoff, K.	1996		GER	Obernhausen, near Gersfeld, Hesse, Germany	NA	NA	C. pyrenaica	2	12	12	0	n		50.4667	9.95
00251	Chloroplast DNA restriction site variation and RAPD-analyses in Cochlearia (Brassicaceae): Biosystematics and speciation. Nord. J. Bot. 16(6) 1996	Koch, M., Hurka, H., Mummenhoff, K.	1996		GER	Taching, Mühltal, Bavaria, Germany	NA	NA	C. pyrenaica	2	12	12	0	n		47.9667	12.7167
00252	Chloroplast DNA restriction site variation and RAPD-analyses in Cochlearia (Brassicaceae): Biosystematics and speciation. Nord. J. Bot. 16(6) 1996	Koch, M., Hurka, H., Mummenhoff, K.	1996		GER	Taching, Waging a. See, Moosmühle, Bavaria, Germany	NA	NA	C. pyrenaica	2	12	12	0	n		47.9667	12.7333
00253	Chloroplast DNA restriction site variation and RAPD-analyses in Cochlearia (Brassicaceae): Biosystematics and speciation. Nord. J. Bot. 16(6) 1996	Koch, M., Hurka, H., Mummenhoff, K.	1996		GER	Zusmarshausen, Bavaria, Germany	NA	NA	C. pyrenaica	2	12	12	0	n		48.4167	9.6
00254	Chloroplast DNA restriction site variation and RAPD-analyses in Cochlearia (Brassicaceae): Biosystematics and speciation. Nord. J. Bot. 16(6) 1996	Koch, M., Hurka, H., Mummenhoff, K.	1996		UK	Brassington, Great Britain	NA	NA	C. pyrenaica	2	12	12	0	n		53.0833	-1.63333
00255	Chloroplast DNA restriction site variation and RAPD-analyses in Cochlearia (Brassicaceae): Biosystematics and speciation. Nord. J. Bot. 16(6) 1996	Koch, M., Hurka, H., Mummenhoff, K.	1996		UK	Burnhope Set, Teesdale, Great Britain	NA	NA	C. pyrenaica	2	12	12	0	n		54.7	-2.33333
00256	Chloroplast DNA restriction site variation and RAPD-analyses in Cochlearia (Brassicaceae): Biosystematics and speciation. Nord. J. Bot. 16(6) 1996	Koch, M., Hurka, H., Mummenhoff, K.	1996		CZ	North Carpathians Vysoké Tatry, Kvetnica, Czechian	NA	NA	C. tatrae	6	42	42	0	n		49	20
00257	Isozymes, Speciation and Evolution in the Polyploid Complex Cochlearia L. (Brassicaceae) Bot. Acta 111 (1998)411-425	Koch, M., Huthmann, M., Hurka, H.	1998		ES	Tinamayor near Unquera, Cantabria, Spain	NA	NA	C. aestuaria	2	12	12	0	n		43.45	-4.55
00258	Isozymes, Speciation and Evolution in the Polyploid Complex Cochlearia L. (Brassicaceae) Bot. Acta 111 (1998)411-425	Koch, M., Huthmann, M., Hurka, H.	1998		ES	Villaviciosa, Asturias, Spain	NA	NA	C. aestuaria	2	12	12	0	n		43.5667	-5.45
00259	Isozymes, Speciation and Evolution in the Polyploid Complex Cochlearia L. (Brassicaceae) Bot. Acta 111 (1998)411-425	Koch, M., Huthmann, M., Hurka, H.	1998		DK	Ølsemagle, Revle, Denmark	NA	NA	C. anglica	8	48	48	0	n		55.5	12.25
00260	Isozymes, Speciation and Evolution in the Polyploid Complex Cochlearia L. (Brassicaceae) Bot. Acta 111 (1998)411-425	Koch, M., Huthmann, M., Hurka, H.	1998		DK	Samsø, Denmark	NA	NA	C. anglica	8	48	48	0	n		55.9167	10.5167
00261	Isozymes, Speciation and Evolution in the Polyploid Complex Cochlearia L. (Brassicaceae) Bot. Acta 111 (1998)411-425	Koch, M., Huthmann, M., Hurka, H.	1998		DK?	Staunings	NA	NA	C. anglica	8	48	48	0	n		55.4833	12.2333
00262	Isozymes, Speciation and Evolution in the Polyploid Complex Cochlearia L. (Brassicaceae) Bot. Acta 111 (1998)411-425	Koch, M., Huthmann, M., Hurka, H.	1998		FR	Salaanelles, France	NA	NA	C. anglica	8	48	48	0	n		49.35	-0.216667
00263	Isozymes, Speciation and Evolution in the Polyploid Complex Cochlearia L. (Brassicaceae) Bot. Acta 111 (1998)411-425	Koch, M., Huthmann, M., Hurka, H.	1998		GER	Harle-Siel/Neuharlinger Siel, Germany	NA	NA	C. anglica	8	48	48	0	n		53.7	7.8
00264	Isozymes, Speciation and Evolution in the Polyploid Complex Cochlearia L. (Brassicaceae) Bot. Acta 111 (1998)411-425	Koch, M., Huthmann, M., Hurka, H.	1998		GER	Lütjenburg near Howacht, Germany	NA	NA	C. anglica	8	48	48	0	n		54.3333	10.6667
00265	Isozymes, Speciation and Evolution in the Polyploid Complex Cochlearia L. (Brassicaceae) Bot. Acta 111 (1998)411-425	Koch, M., Huthmann, M., Hurka, H.	1998		GER	Mariensiel near Wilhelmshaven, Germany	NA	NA	C. anglica	8	48	48	0	n		53.5	8.08333
00266	Isozymes, Speciation and Evolution in the Polyploid Complex Cochlearia L. (Brassicaceae) Bot. Acta 111 (1998)411-425	Koch, M., Huthmann, M., Hurka, H.	1998		GER	Schenstedt, Jadebusen, Germany	NA	NA	C. anglica	8	48	48	0	n		53.45	8.46667
00267	Isozymes, Speciation and Evolution in the Polyploid Complex Cochlearia L. (Brassicaceae) Bot. Acta 111 (1998)411-425	Koch, M., Huthmann, M., Hurka, H.	1998		GER	Eßmühle near Unteregg, Bavaria, Germany	NA	NA	C. bavarica	6	36	36	0	n		47.9667	10.45
00268	Isozymes, Speciation and Evolution in the Polyploid Complex Cochlearia L. (Brassicaceae) Bot. Acta 111 (1998)411-425	Koch, M., Huthmann, M., Hurka, H.	1998		GER	Friesenried near Kaufbeuren, Bavaria, Germany	NA	NA	C. bavarica	6	36	36	0	n		47.8833	10.5333
00269	Isozymes, Speciation and Evolution in the Polyploid Complex Cochlearia L. (Brassicaceae) Bot. Acta 111 (1998)411-425	Koch, M., Huthmann, M., Hurka, H.	1998		GER	Gfäll near Ebersbach, Bavaria, Germany	NA	NA	C. bavarica	6	36	36	0	n		47.8833	10.45
00270	Isozymes, Speciation and Evolution in the Polyploid Complex Cochlearia L. (Brassicaceae) Bot. Acta 111 (1998)411-425	Koch, M., Huthmann, M., Hurka, H.	1998		GER	Glonn, Bavaria, Germany	NA	NA	C. bavarica	6	36	36	0	n		47.9833	11.8667
00271	Isozymes, Speciation and Evolution in the Polyploid Complex Cochlearia L. (Brassicaceae) Bot. Acta 111 (1998)411-425	Koch, M., Huthmann, M., Hurka, H.	1998		GER	Immenthal near Obergünzburg, Bavaria, Germany	NA	NA	C. bavarica	6	36	36	0	n		47.7833	10.3667
00272	Isozymes, Speciation and Evolution in the Polyploid Complex Cochlearia L. (Brassicaceae) Bot. Acta 111 (1998)411-425	Koch, M., Huthmann, M., Hurka, H.	1998		GER	Klessen near Dietratried, Bavaria, Germany	NA	NA	C. bavarica	6	36	36	0	n		47.9167	10.25
00273	Isozymes, Speciation and Evolution in the Polyploid Complex Cochlearia L. (Brassicaceae) Bot. Acta 111 (1998)411-425	Koch, M., Huthmann, M., Hurka, H.	1998		GER	Mindel springs near Baiersried, Bavaria, Germany	NA	NA	C. bavarica	6	36	36	0	n		47.9167	10.45
00274	Isozymes, Speciation and Evolution in the Polyploid Complex Cochlearia L. (Brassicaceae) Bot. Acta 111 (1998)411-425	Koch, M., Huthmann, M., Hurka, H.	1998		GER	Ollarzried, Bavaria, Germany	NA	NA	C. bavarica	6	36	36	0	n		47.9	10.35
00275	Isozymes, Speciation and Evolution in the Polyploid Complex Cochlearia L. (Brassicaceae) Bot. Acta 111 (1998)411-425	Koch, M., Huthmann, M., Hurka, H.	1998		GER	Stoßberg near Untrasried, Bavaria, Germany	NA	NA	C. bavarica	6	36	36	0	n		47.8167	10.35
00276	Isozymes, Speciation and Evolution in the Polyploid Complex Cochlearia L. (Brassicaceae) Bot. Acta 111 (1998)411-425	Koch, M., Huthmann, M., Hurka, H.	1998		GER	Thalham north Halfing, Bavaria, Germany	NA	NA	C. bavarica	6	36	36	0	n		47.9667	12.3
00277	Isozymes, Speciation and Evolution in the Polyploid Complex Cochlearia L. (Brassicaceae) Bot. Acta 111 (1998)411-425	Koch, M., Huthmann, M., Hurka, H.	1998		GER	Vagen near Bruckmühl, Bavaria, Germany	NA	NA	C. bavarica	6	36	36	0	n		47.8667	11.8833
00278	Isozymes, Speciation and Evolution in the Polyploid Complex Cochlearia L. (Brassicaceae) Bot. Acta 111 (1998)411-425	Koch, M., Huthmann, M., Hurka, H.	1998		GER	Zadels, east of Ollarzried, Bavaria, Germany	NA	NA	C. bavarica	6	36	36	0	n		47.9	10.3833
00279	Isozymes, Speciation and Evolution in the Polyploid Complex Cochlearia L. (Brassicaceae) Bot. Acta 111 (1998)411-425	Koch, M., Huthmann, M., Hurka, H.	1998		DK	Bornholm, Denmark	NA	NA	C. danica	6	42	42	0	n		55	15
00280	Isozymes, Speciation and Evolution in the Polyploid Complex Cochlearia L. (Brassicaceae) Bot. Acta 111 (1998)411-425	Koch, M., Huthmann, M., Hurka, H.	1998		DK	Christansø, Denmark	NA	NA	C. danica	6	42	42	0	n		55.3333	15.1
00281	Isozymes, Speciation and Evolution in the Polyploid Complex Cochlearia L. (Brassicaceae) Bot. Acta 111 (1998)411-425	Koch, M., Huthmann, M., Hurka, H.	1998		DK	Reersø, Denmark	NA	NA	C. danica	6	42	42	0	n		55.5	11.1167
00282	Isozymes, Speciation and Evolution in the Polyploid Complex Cochlearia L. (Brassicaceae) Bot. Acta 111 (1998)411-425	Koch, M., Huthmann, M., Hurka, H.	1998		EST	Vilsandi Island, Saaremaa District, Republic of Estonia	NA	NA	C. danica	6	42	42	0	n		58.1667	21.8
00283	Isozymes, Speciation and Evolution in the Polyploid Complex Cochlearia L. (Brassicaceae) Bot. Acta 111 (1998)411-425	Koch, M., Huthmann, M., Hurka, H.	1998		FR	Boulogne-sur-Mer, France	NA	NA	C. danica	6	42	42	0	n		50.7333	1.5
00284	Isozymes, Speciation and Evolution in the Polyploid Complex Cochlearia L. (Brassicaceae) Bot. Acta 111 (1998)411-425	Koch, M., Huthmann, M., Hurka, H.	1998		FR	Caen, France	NA	NA	C. danica	6	42	42	0	n		49.3333	-0.25
00285	Isozymes, Speciation and Evolution in the Polyploid Complex Cochlearia L. (Brassicaceae) Bot. Acta 111 (1998)411-425	Koch, M., Huthmann, M., Hurka, H.	1998		FR	Flamanville, France	NA	NA	C. danica	6	42	42	0	n		49.5333	-1.88333
00286	Isozymes, Speciation and Evolution in the Polyploid Complex Cochlearia L. (Brassicaceae) Bot. Acta 111 (1998)411-425	Koch, M., Huthmann, M., Hurka, H.	1998		FR	Flamanville, France	NA	NA	C. danica	6	42	42	0	n		49.5333	-1.88333
00287	Isozymes, Speciation and Evolution in the Polyploid Complex Cochlearia L. (Brassicaceae) Bot. Acta 111 (1998)411-425	Koch, M., Huthmann, M., Hurka, H.	1998		FR	Gateville, France	NA	NA	C. danica	6	42	42	0	n		49.6833	-1.26667
00288	Isozymes, Speciation and Evolution in the Polyploid Complex Cochlearia L. (Brassicaceae) Bot. Acta 111 (1998)411-425	Koch, M., Huthmann, M., Hurka, H.	1998		FR	Gatteville, France	NA	NA	C. danica	6	42	42	0	n		49.6833	-1.26667
00289	Isozymes, Speciation and Evolution in the Polyploid Complex Cochlearia L. (Brassicaceae) Bot. Acta 111 (1998)411-425	Koch, M., Huthmann, M., Hurka, H.	1998		FR	Roscoff, France	NA	NA	C. danica	6	42	42	0	n		48.7	-4
00290	Isozymes, Speciation and Evolution in the Polyploid Complex Cochlearia L. (Brassicaceae) Bot. Acta 111 (1998)411-425	Koch, M., Huthmann, M., Hurka, H.	1998		FR	Saint-Gildas de Rhuys, France	NA	NA	C. danica	6	42	42	0	n		47.5	-2.83333
00291	Isozymes, Speciation and Evolution in the Polyploid Complex Cochlearia L. (Brassicaceae) Bot. Acta 111 (1998)411-425	Koch, M., Huthmann, M., Hurka, H.	1998		FR	Tregastel, France	NA	NA	C. danica	6	42	42	0	n		48.8333	-3.6
00292	Isozymes, Speciation and Evolution in the Polyploid Complex Cochlearia L. (Brassicaceae) Bot. Acta 111 (1998)411-425	Koch, M., Huthmann, M., Hurka, H.	1998		FR	Winnereux near Calais, France	NA	NA	C. danica	6	42	42	0	n		50.95	1.83333
00293	Isozymes, Speciation and Evolution in the Polyploid Complex Cochlearia L. (Brassicaceae) Bot. Acta 111 (1998)411-425	Koch, M., Huthmann, M., Hurka, H.	1998		GER	Baltrum, Lower Saxony, Germany	NA	NA	C. danica	6	42	42	0	n		53.7333	7.41667
00294	Isozymes, Speciation and Evolution in the Polyploid Complex Cochlearia L. (Brassicaceae) Bot. Acta 111 (1998)411-425	Koch, M., Huthmann, M., Hurka, H.	1998		GER	Borkum, Eastern Island, Lower Saxony, Germany	NA	NA	C. danica	6	42	42	0	n		53.6	6.83333
00295	Isozymes, Speciation and Evolution in the Polyploid Complex Cochlearia L. (Brassicaceae) Bot. Acta 111 (1998)411-425	Koch, M., Huthmann, M., Hurka, H.	1998		GER	Borkum, Western Island, Lower Saxony, Germany	NA	NA	C. danica	6	42	42	0	n		53.9333	6.7
00296	Isozymes, Speciation and Evolution in the Polyploid Complex Cochlearia L. (Brassicaceae) Bot. Acta 111 (1998)411-425	Koch, M., Huthmann, M., Hurka, H.	1998		GER	Motorway 30, Bad Nenndorf, Lower Saxony, Germany	NA	NA	C. danica	6	42	42	0	n		52.35	9.41667
00297	Isozymes, Speciation and Evolution in the Polyploid Complex Cochlearia L. (Brassicaceae) Bot. Acta 111 (1998)411-425	Koch, M., Huthmann, M., Hurka, H.	1998		GER	Motorway 30, Rödinghausen, Lower Saxony, Germany	NA	NA	C. danica	6	42	42	0	n		52.2	8.5
00298	Isozymes, Speciation and Evolution in the Polyploid Complex Cochlearia L. (Brassicaceae) Bot. Acta 111 (1998)411-425	Koch, M., Huthmann, M., Hurka, H.	1998		GER	Norderney, Lower Saxony, Germany	NA	NA	C. danica	6	42	42	0	n		53.7333	7.16667
00299	Isozymes, Speciation and Evolution in the Polyploid Complex Cochlearia L. (Brassicaceae) Bot. Acta 111 (1998)411-425	Koch, M., Huthmann, M., Hurka, H.	1998		GER	Sylt, Lower Saxony, Germany	NA	NA	C. danica	6	42	42	0	n		55	8.26667
00300	Isozymes, Speciation and Evolution in the Polyploid Complex Cochlearia L. (Brassicaceae) Bot. Acta 111 (1998)411-425	Koch, M., Huthmann, M., Hurka, H.	1998		NL	Callantsoog, Western Frisia, Netherlands	NA	NA	C. danica	6	42	42	0	n		52.8333	4.65
00301	Isozymes, Speciation and Evolution in the Polyploid Complex Cochlearia L. (Brassicaceae) Bot. Acta 111 (1998)411-425	Koch, M., Huthmann, M., Hurka, H.	1998		PT	Farilhöes, Arg da Berlenga, Portugal	NA	NA	C. danica	6	42	42	0	n		39.4833	-9.18333
00302	Isozymes, Speciation and Evolution in the Polyploid Complex Cochlearia L. (Brassicaceae) Bot. Acta 111 (1998)411-425	Koch, M., Huthmann, M., Hurka, H.	1998		PT	Ilhen Cerco da Velha, Arg da Berlenga, Portugal	NA	NA	C. danica	6	42	42	0	n		39.4667	-9.13333
00303	Isozymes, Speciation and Evolution in the Polyploid Complex Cochlearia L. (Brassicaceae) Bot. Acta 111 (1998)411-425	Koch, M., Huthmann, M., Hurka, H.	1998		AT	Gurktaler Alps, Eisenhut, Styria, Austria	NA	NA	C. excelsa	2	12	12	0	n		47.0333	13.9333
00307	Isozymes, Speciation and Evolution in the Polyploid Complex Cochlearia L. (Brassicaceae) Bot. Acta 111 (1998)411-425	Koch, M., Huthmann, M., Hurka, H.	1998		ICE	Stokkseyri, Iceland	NA	NA	C. groenlandica	2	14	14	0	n		63.8333	-21.05
00309	Isozymes, Speciation and Evolution in the Polyploid Complex Cochlearia L. (Brassicaceae) Bot. Acta 111 (1998)411-425	Koch, M., Huthmann, M., Hurka, H.	1998		AT	Moosbrunn near Wien, Austria	NA	NA	C. macrorrhiza	2	12	12	0	n		48.0333	16.1167
00310	Isozymes, Speciation and Evolution in the Polyploid Complex Cochlearia L. (Brassicaceae) Bot. Acta 111 (1998)411-425	Koch, M., Huthmann, M., Hurka, H.	1998		DK	Hirtshals, Denmark	NA	NA	C. officinalis	4	24	24	0	n		57.5833	9.96667
00311	Isozymes, Speciation and Evolution in the Polyploid Complex Cochlearia L. (Brassicaceae) Bot. Acta 111 (1998)411-425	Koch, M., Huthmann, M., Hurka, H.	1998		DK	Ingstrup, N. Jutland, Denmark	NA	NA	C. officinalis	4	24	24	0	n		57.3833	9.66667
00312	Isozymes, Speciation and Evolution in the Polyploid Complex Cochlearia L. (Brassicaceae) Bot. Acta 111 (1998)411-425	Koch, M., Huthmann, M., Hurka, H.	1998		DK	Allerup, Denmark	NA	NA	C. officinalis	4	24	24	0	n		55.85	12
00313	Isozymes, Speciation and Evolution in the Polyploid Complex Cochlearia L. (Brassicaceae) Bot. Acta 111 (1998)411-425	Koch, M., Huthmann, M., Hurka, H.	1998		DK	Enebærreodde, Denmark	NA	NA	C. officinalis	4	24	24	0	n		55.5167	10.55
00314	Isozymes, Speciation and Evolution in the Polyploid Complex Cochlearia L. (Brassicaceae) Bot. Acta 111 (1998)411-425	Koch, M., Huthmann, M., Hurka, H.	1998		DK	Udby Vig, Denmark	NA	NA	C. officinalis	4	24	24	0	n		55.3833	11.1667
00315	Isozymes, Speciation and Evolution in the Polyploid Complex Cochlearia L. (Brassicaceae) Bot. Acta 111 (1998)411-425	Koch, M., Huthmann, M., Hurka, H.	1998		NOR	Feigum, Sognefjord, Norway	NA	NA	C. officinalis	4	24	24	0	n		61.5	7.5
00316	Isozymes, Speciation and Evolution in the Polyploid Complex Cochlearia L. (Brassicaceae) Bot. Acta 111 (1998)411-425	Koch, M., Huthmann, M., Hurka, H.	1998		NOR	Larvik, Oslofjord, Norway	NA	NA	C. officinalis	4	24	24	0	n		59.05	10.0333
00317	Isozymes, Speciation and Evolution in the Polyploid Complex Cochlearia L. (Brassicaceae) Bot. Acta 111 (1998)411-425	Koch, M., Huthmann, M., Hurka, H.	1998		NOR	Røra, Trondheim-fjord, Norway	NA	NA	C. officinalis	4	24	24	0	n		63.8667	11.35
00318	Isozymes, Speciation and Evolution in the Polyploid Complex Cochlearia L. (Brassicaceae) Bot. Acta 111 (1998)411-425	Koch, M., Huthmann, M., Hurka, H.	1998		NOR	Sør-Varanger near Bugøynnes, Norway	NA	NA	C. officinalis	4	24	24	0	n		69.9667	29.5333
00319	Isozymes, Speciation and Evolution in the Polyploid Complex Cochlearia L. (Brassicaceae) Bot. Acta 111 (1998)411-425	Koch, M., Huthmann, M., Hurka, H.	1998		NOR	Stjørdal, Trondheimsfjord, Norway	NA	NA	C. officinalis	4	24	24	0	n		63.4667	10.85
00320	Isozymes, Speciation and Evolution in the Polyploid Complex Cochlearia L. (Brassicaceae) Bot. Acta 111 (1998)411-425	Koch, M., Huthmann, M., Hurka, H.	1998		NOR	Vararger, Hamningberg, Norway	NA	NA	C. officinalis	4	24	24	0	n		70.5333	30.55
00321	Isozymes, Speciation and Evolution in the Polyploid Complex Cochlearia L. (Brassicaceae) Bot. Acta 111 (1998)411-425	Koch, M., Huthmann, M., Hurka, H.	1998		UK	Achmelvich, near Lochinver, Great Britain	NA	NA	C. officinalis	4	24	24	0	n		58.1667	-5.3
00322	Isozymes, Speciation and Evolution in the Polyploid Complex Cochlearia L. (Brassicaceae) Bot. Acta 111 (1998)411-425	Koch, M., Huthmann, M., Hurka, H.	1998		UK	Cromarthy Firth, Ross, Great Britain	NA	NA	C. officinalis	4	24	24	0	n		57.6167	-4.38333
00323	Isozymes, Speciation and Evolution in the Polyploid Complex Cochlearia L. (Brassicaceae) Bot. Acta 111 (1998)411-425	Koch, M., Huthmann, M., Hurka, H.	1998		UK	Doornie, near Loch Alsh, Great Britain	NA	NA	C. officinalis	4	24	24	0	n		57.6	-5.51667
00324	Isozymes, Speciation and Evolution in the Polyploid Complex Cochlearia L. (Brassicaceae) Bot. Acta 111 (1998)411-425	Koch, M., Huthmann, M., Hurka, H.	1998		UK	Dunvegan Castle, Skye, Great Britain	NA	NA	C. officinalis	4	24	24	0	n		57.5667	-6.58333
00325	Isozymes, Speciation and Evolution in the Polyploid Complex Cochlearia L. (Brassicaceae) Bot. Acta 111 (1998)411-425	Koch, M., Huthmann, M., Hurka, H.	1998		UK	Edinbane, Skye, Great Britain	NA	NA	C. officinalis	4	24	24	0	n		57.5	-6.45
00326	Isozymes, Speciation and Evolution in the Polyploid Complex Cochlearia L. (Brassicaceae) Bot. Acta 111 (1998)411-425	Koch, M., Huthmann, M., Hurka, H.	1998		UK	Inverewe Gardens, Loch Ewe, Great Britain	NA	NA	C. officinalis	4	24	24	0	n		57.7833	-5.6
00327	Isozymes, Speciation and Evolution in the Polyploid Complex Cochlearia L. (Brassicaceae) Bot. Acta 111 (1998)411-425	Koch, M., Huthmann, M., Hurka, H.	1998		UK	Inverkeithing, near Edinburgh, Great Britain	NA	NA	C. officinalis	4	24	24	0	n		56.0333	-3.41667
00328	Isozymes, Speciation and Evolution in the Polyploid Complex Cochlearia L. (Brassicaceae) Bot. Acta 111 (1998)411-425	Koch, M., Huthmann, M., Hurka, H.	1998		UK	Littleferry, near Golspie, Great Britain	NA	NA	C. officinalis	4	24	24	0	n		57.95	-4
00329	Isozymes, Speciation and Evolution in the Polyploid Complex Cochlearia L. (Brassicaceae) Bot. Acta 111 (1998)411-425	Koch, M., Huthmann, M., Hurka, H.	1998		UK	Stainforth, Yorkshire, Great Britain	NA	NA	C. officinalis	4	24	24	0	n		54.0833	-2.26667
00330	Isozymes, Speciation and Evolution in the Polyploid Complex Cochlearia L. (Brassicaceae) Bot. Acta 111 (1998)411-425	Koch, M., Huthmann, M., Hurka, H.	1998		UK	Malham, Yorkshire, Great Britain	NA	NA	C. officinalis (metallophil)	4	24	24	0	n		54.0667	-2.15
00331	Isozymes, Speciation and Evolution in the Polyploid Complex Cochlearia L. (Brassicaceae) Bot. Acta 111 (1998)411-425	Koch, M., Huthmann, M., Hurka, H.	1998		NOR	Birtavarre, Kåfjord, Norway	NA	NA	C. officinalis ssp. norvegica	4	24	24	0	n		69.5	20.8
00332	Isozymes, Speciation and Evolution in the Polyploid Complex Cochlearia L. (Brassicaceae) Bot. Acta 111 (1998)411-425	Koch, M., Huthmann, M., Hurka, H.	1998		NOR	Isfjorden, Romsdalfjord, Norway	NA	NA	C. officinalis ssp. norvegica	4	24	24	0	n		62.5833	7.76667
00333	Isozymes, Speciation and Evolution in the Polyploid Complex Cochlearia L. (Brassicaceae) Bot. Acta 111 (1998)411-425	Koch, M., Huthmann, M., Hurka, H.	1998		UK	Ullapool, Loch Broom, Great Britain	NA	NA	C. officinalis ssp. norvegica	4	24	24	0	n		57.8958	-5.16142	c.e.
00334	Isozymes, Speciation and Evolution in the Polyploid Complex Cochlearia L. (Brassicaceae) Bot. Acta 111 (1998)411-425	Koch, M., Huthmann, M., Hurka, H.	1998		PL	Pustynia Bledowska near Olkusz, Poland	NA	NA	C. polonica	6	36	36	0	n		50.2833	19.55
00335	Isozymes, Speciation and Evolution in the Polyploid Complex Cochlearia L. (Brassicaceae) Bot. Acta 111 (1998)411-425	Koch, M., Huthmann, M., Hurka, H.	1998		BE	Kelmis, Belgium	NA	NA	C. pyrenaica	2	12	12	0	n		50.7	6
00336	Isozymes, Speciation and Evolution in the Polyploid Complex Cochlearia L. (Brassicaceae) Bot. Acta 111 (1998)411-425	Koch, M., Huthmann, M., Hurka, H.	1998		GER	Einbeck, near Ilmendorf, Bavaria, Germany	NA	NA	C. pyrenaica	2	12	12	0	n		48.75	11.6667
00337	Isozymes, Speciation and Evolution in the Polyploid Complex Cochlearia L. (Brassicaceae) Bot. Acta 111 (1998)411-425	Koch, M., Huthmann, M., Hurka, H.	1998		GER	Horgau, near Hainhofen, Bavaria, Germany	NA	NA	C. pyrenaica	2	12	12	0	n		48.3833	10.7
00338	Isozymes, Speciation and Evolution in the Polyploid Complex Cochlearia L. (Brassicaceae) Bot. Acta 111 (1998)411-425	Koch, M., Huthmann, M., Hurka, H.	1998		GER	Oberalme, North Rhine-Westphalia, Germany	NA	NA	C. pyrenaica	2	12	12	0	n		51.45	8.61667
00339	Isozymes, Speciation and Evolution in the Polyploid Complex Cochlearia L. (Brassicaceae) Bot. Acta 111 (1998)411-425	Koch, M., Huthmann, M., Hurka, H.	1998		GER	Obernhausen, near Gersfeld, Hesse, Germany	NA	NA	C. pyrenaica	2	12	12	0	n		50.4667	9.95
00340	Isozymes, Speciation and Evolution in the Polyploid Complex Cochlearia L. (Brassicaceae) Bot. Acta 111 (1998)411-425	Koch, M., Huthmann, M., Hurka, H.	1998		GER	Taching, Mühltal, Bavaria, Germany	NA	NA	C. pyrenaica	2	12	12	0	n		47.9667	12.7167
00341	Isozymes, Speciation and Evolution in the Polyploid Complex Cochlearia L. (Brassicaceae) Bot. Acta 111 (1998)411-425	Koch, M., Huthmann, M., Hurka, H.	1998		GER	Taching, Waging a. See, Moosmühle, Bavaria, Germany	NA	NA	C. pyrenaica	2	12	12	0	n		47.9667	12.7333
00342	Isozymes, Speciation and Evolution in the Polyploid Complex Cochlearia L. (Brassicaceae) Bot. Acta 111 (1998)411-425	Koch, M., Huthmann, M., Hurka, H.	1998		GER	Zusmarshausen, Bavaria, Germany	NA	NA	C. pyrenaica	2	12	12	0	n		48.4167	9.6
00343	Isozymes, Speciation and Evolution in the Polyploid Complex Cochlearia L. (Brassicaceae) Bot. Acta 111 (1998)411-425	Koch, M., Huthmann, M., Hurka, H.	1998		UK	Brassington, Great Britain	NA	NA	C. pyrenaica	2	12	12	0	n		53.0833	-1.63333
00344	Isozymes, Speciation and Evolution in the Polyploid Complex Cochlearia L. (Brassicaceae) Bot. Acta 111 (1998)411-425	Koch, M., Huthmann, M., Hurka, H.	1998		UK	Burnhope Set, Teesdale, Great Britain	NA	NA	C. pyrenaica	2	12	12	0	n		54.7	-2.33333
00345	Isozymes, Speciation and Evolution in the Polyploid Complex Cochlearia L. (Brassicaceae) Bot. Acta 111 (1998)411-425	Koch, M., Huthmann, M., Hurka, H.	1998		CZ	North Carpathians Vysoké Tatry, Kvetnica, Czechian	NA	NA	C. tatrae	6	42	42	0	n		49	20
00346	The genus Cochlearia L. (Brassicaceae) in the Eastern Carpathians and adjacent area. Botanical Journal of the Linnean Society, 2006, 151, 355–364.	Kochjarova, J., Valachovič, M., Bures, P., Mráz, P.	2006		RO	Romania, Maramures Mountains, Salhoi, N47°39′, E24°59′, 1226 m a.s.l.	NA	NA	C. borzeana	8	48	48	0	n	2.819 ± 0.101	47.65	24.9833
00347	The genus Cochlearia L. (Brassicaceae) in the Eastern Carpathians and adjacent area. Botanical Journal of the Linnean Society, 2006, 151, 355–364.	Kochjarova, J., Valachovič, M., Bures, P., Mráz, P.	2006		RO	Romania, Obcina Mestecbnisului Mountains, Rachitisul Mare hill near the village of Benia, N47°39′, E25°15′, 920 m a.s.l.	NA	NA	C. borzeana	8	48	48	0	n	2.827 ± 0.017	47.65	25.25
00348	The genus Cochlearia L. (Brassicaceae) in the Eastern Carpathians and adjacent area. Botanical Journal of the Linnean Society, 2006, 151, 355–364.	Kochjarova, J., Valachovič, M., Bures, P., Mráz, P.	2006		UKR	Ukraine, the village of Zolochiv east from the town of Lviv, Zakhodni Buh river spring area, N49°50′, E25°06′, 297 m a.s.l.	NA	NA	C. pyrenaica s.l.	2	12	12	0	n	0.910 ± 0.039	49.8333	25.1
00349	The genus Cochlearia L. (Brassicaceae) in the Eastern Carpathians and adjacent area. Botanical Journal of the Linnean Society, 2006, 151, 355–364.	Kochjarova, J., Valachovič, M., Bures, P., Mráz, P.	2006		SK	Slovakia, Jazierce, south of the town of Ru|omberok, hard water spring, N49°01′, E19°16′, 600 m a.s.l.	NA	NA	C. pyrenaica s.s.	2	12	11	0	n	0.734 ± 0.013	49.0167	19.2667
00350	The genus Cochlearia L. (Brassicaceae) in the Eastern Carpathians and adjacent area. Botanical Journal of the Linnean Society, 2006, 151, 355–364.	Kochjarova, J., Valachovič, M., Bures, P., Mráz, P.	2006		SK	Slovakia, Vel’ká Fatra Mountains, Bukovinka travertine hill near the town of Ru|omberok, N49°00′, E19°17′, 650 m a.s.l.	NA	NA	C. pyrenaica s.s.	2	12	12	0	n	0.784 ± 0.008	49	19.2833
00351	The genus Cochlearia L. (Brassicaceae) in the Eastern Carpathians and adjacent area. Botanical Journal of the Linnean Society, 2006, 151, 355–364.	Kochjarova, J., Valachovič, M., Bures, P., Mráz, P.	2006		SK	Slovakia, Vysoké Tatry Mountains, Velická dolina valley, N49°09′, E20°09′, 1850 m a.s.l.	NA	NA	C. tatrae	6	12	12	0	n	2.089 ± 0.087	49.15	20.15
00352	Cochlearia pyrenaica DC., das Löffelkraut, in Oberösterreich (mit Anmerkungen zur Karyologie und zur Genomgröße). Beitr. Naturk. Oberösterreichs 5 151-160.	Krisai & Greilhuber	1997		A	Ober-Österreich: Braunau	NA	NA	C. pyrenaica	2	12	12	0	n	0.752	48.2314	12.997	c.e.
00353	Cochlearia pyrenaica DC., das Löffelkraut, in Oberösterreich (mit Anmerkungen zur Karyologie und zur Genomgröße). Beitr. Naturk. Oberösterreichs 5 151-160.	Krisai, R. & Greilhuber, J.	1997		A	Klostermühle in Blankenbach, Stadt Braunau, Oberösterreich	NA	NA	C. pyrenaica	2	12	12	0	n		48.2314	12.997	c.e.
00362	Contributions to the idiogram study in phanerogamous plants. I.	Matsuura & Suto	1935	Saunte 1955	JP	Akkesi, prov. Kusiro	NA	NA	C. oblongifolia	2	14	14	0	n		43.0542	144.847	c.e.
00363	Contributions to the ldiogram study in phanerogamous plants. 1. J. Fac Set , Hokkaido Umv. 5, 3, 1-75	Matsuura & Suto	1935	Saunte 1955	JP	Northern Japan	NA	NA	C. oblongifolia	2	14	14	0	n		52.74	143.28	c.e.
00366	Cochlearia pyrenaica DC., a species new to Scotland. Watsonia, 17,49-52 (1988)	Nordal, I.	1988		UK	Scotland, v.c. 104, N. Ebudes, Isle of Skye, Beinn Edra, above Loch Corcasgil, 450 m, GR 18/452.634, 30th July 1984.	NA	NA	C. pyrenaica	2	12	14	2	y		57.5942	-6.26553	c.e.
00367	Cochlearia pyrenaica DC., a species new to Scotland. Watsonia, 17,49-52 (1988)	Nordal, I.	1988		UK	Scotland, v.c. 104, N. Ebudes, Isle of Skye, Beinn Edra, above Loch Corcasgil, 450 m, GR 18/452.634, 30th July 1984.	NA	NA	C. pyrenaica	2	12	13	1	y		57.5942	-6.26553	c.e.
00368	Cochlearia pyrenaica DC., a species new to Scotland. Watsonia, 17,49-52 (1988)	Nordal, I.	1988		UK	Scotland, v.c. 104, N. Ebudes, Isle of Skye, Beinn Edra, above Loch Corcasgil, 450 m, GR 18/452.634, 30th July 1984.	NA	NA	C. pyrenaica	2	12	12	0	n		57.5942	-6.26553	c.e.
00369	Effect of ploidy level on fruit morphology, seed germination and juvenile growth in scurvy grass (Cochlearia officinalis L. s.l., Brassicaceae). Plant Species Biology (1999) 14, 201–215	Pegtel, D.M.	1999		BE	Moresnet	NA	NA	C. pyrenaica	2	12	12	0	n		50.7	6	c.e.
00370	Effect of ploidy level on fruit morphology, seed germination and juvenile growth in scurvy grass (Cochlearia officinalis L. s.l., Brassicaceae). Plant Species Biology (1999) 14, 201–216	Pegtel, D.M.	1999		NL	Eenerstukken	NA	NA	C. officinalis	4	24	24	0	n		53.0833	6.4	c.e.
00371	Effect of ploidy level on fruit morphology, seed germination and juvenile growth in scurvy grass (Cochlearia officinalis L. s.l., Brassicaceae). Plant Species Biology (1999) 14, 201–217	Pegtel, D.M.	1999		NL	Kinnum	NA	NA	C. danica x officinalis	na	24	33	9	y		53.3749	5.27478	c.e.
00372	Effect of ploidy level on fruit morphology, seed germination and juvenile growth in scurvy grass (Cochlearia officinalis L. s.l., Brassicaceae). Plant Species Biology (1999) 14, 201–218	Pegtel, D.M.	1999		NL	Waarde	NA	NA	C. x hollandica	6	24	36	12	y		51.4197	4.06899	c.e.
00373	Effect of ploidy level on fruit morphology, seed germination and juvenile growth in scurvy grass (Cochlearia officinalis L. s.l., Brassicaceae). Plant Species Biology (1999) 14, 201–219	Pegtel, D.M.	1999		NL	Nordpolderzijl	NA	NA	C. anglica	8	48	48	0	n		53.432	6.58251	c.e.
00374	Zytologische Untersuchungen an einigen schweizenschen Hemi-Oreophyten Mitt. Naturf. Get. Bern 11, 43-107.	Rohner, P.	1954	Gill 1971a	CH	Schweiz: Kt. Bern; Gantrischseeli, Eriz, an der Hengstsense.	NA	NA	C. pyrenaica	2	12	12	0	n		46.7114	7.44111	c.e.
00379	Cyto-genetical studies in the Cochlearia officinalis complex	Saunte, L.H.	1955		DK	Gylling Næs, Horsens Fjord, Jylland	NA	NA	C. "anglica"	6	24	36	12	y		55.8531	10.1555	c.e.
00380	Cyto-genetical studies in the Cochlearia officinalis complex	Saunte, L.H.	1955		DK	Kongelunden, Amager	NA	NA	C. anglica	8	48	54	6	y		55.5682	12.5592	c.e.
00381	Cyto-genetical studies in the Cochlearia officinalis complex	Saunte, L.H.	1955		DK	Roden, Lolland	NA	NA	C. anglica	8	48	54	6	y		54.6724	11.8381	c.e.
00382	Cyto-genetical studies in the Cochlearia officinalis complex	Saunte, L.H.	1955		DK	Skælskör Nor, Sjaelland	NA	NA	C. anglica	8	48	54	6	y		55.2774	11.2943	c.e.
00383	Cyto-genetical studies in the Cochlearia officinalis complex	Saunte, L.H.	1955		DK	Stignæs, SW. Sjælland	NA	NA	C. anglica	8	48	54	6	y		55.2208	11.2517	c.e.
00385	Cyto-genetical studies in the Cochlearia officinalis complex	Saunte, L.H.	1955		DK	Glænö	NA	NA	C. danica	6	42	42	0	n		55.1891	11.4567	c.e.
00386	Cyto-genetical studies in the Cochlearia officinalis complex	Saunte, L.H.	1955		DK	Hammeren, Bornholm	NA	NA	C. danica	6	42	42	0	n		55.2984	14.7724	c.e.
00387	Cyto-genetical studies in the Cochlearia officinalis complex	Saunte, L.H.	1955		DK	Kongelunden, Amager	NA	NA	C. danica	6	42	42	0	n		55.5685	12.56	c.e.
00388	Cyto-genetical studies in the Cochlearia officinalis complex	Saunte, L.H.	1955		DK	Roden, Lolland	NA	NA	C. danica	6	42	42	0	n		54.6724	11.8381	c.e.
00389	Cyto-genetical studies in the Cochlearia officinalis complex	Saunte, L.H.	1955		DK	Rörvig, Sjaelland	NA	NA	C. danica	6	42	42	0	n		55.9416	11.7555	c.e.
00390	Cyto-genetical studies in the Cochlearia officinalis complex	Saunte, L.H.	1955		Greenland	Brönlund Fjord, N. Greenland 82° 12' N 32° W	NA	NA	C. groenlandica s.l.	2	14	14	0	n		82.2	-32
00391	Cyto-genetical studies in the Cochlearia officinalis complex	Saunte, L.H.	1955		Greenland	Ikorfat, NW. Greenland	NA	NA	C. groenlandica s.l.	2	14	14	0	n		70.7762	-53.0979	c.e.
00392	Cyto-genetical studies in the Cochlearia officinalis complex	Saunte, L.H.	1955		Greenland	Kuk, NW. Greenland	NA	NA	C. groenlandica s.l.	2	14	14	0	n		73.7	56.2167	c.e.
00393	Cyto-genetical studies in the Cochlearia officinalis complex	Saunte, L.H.	1955		Greenland	Lichtenau-vf., S. Greenland	NA	NA	C. groenlandica s.l.	2	14	14	0	n		60.5071	-45.5378	c.e.
00394	Cyto-genetical studies in the Cochlearia officinalis complex	Saunte, L.H.	1955		Greenland	Narssak, Julianehåb, S. Greenland	NA	NA	C. groenlandica s.l.	2	14	14	0	n		60.7185	-46.0279	c.e.
00395	Cyto-genetical studies in the Cochlearia officinalis complex	Saunte, L.H.	1955		Greenland	Pearyland, N. Greenland	NA	NA	C. groenlandica s.l.	2	14	14	0	n		82.6986	-34.2945	c.e.
00396	Cyto-genetical studies in the Cochlearia officinalis complex	Saunte, L.H.	1955		Greenland	Sukkertoppen, SW. Greenland	NA	NA	C. groenlandica s.l.	2	14	14	0	n		65.4175	-52.8968	c.e.
00397	Cyto-genetical studies in the Cochlearia officinalis complex	Saunte, L.H.	1955		Greenland	Tugtugtaq Island, Julianehåb, S. Greenland	NA	NA	C. groenlandica s.l.	2	14	14	0	n		60.7185	-46.0279	c.e.
00398	Cyto-genetical studies in the Cochlearia officinalis complex	Saunte, L.H.	1955		Greenland	Wollaston Forland, NE. Greenland 74° 28' N 20° 35' W	NA	NA	C. groenlandica s.l.	2	14	14	0	n		74.4667	-20.5833
00399	Cyto-genetical studies in the Cochlearia officinalis complex	Saunte, L.H.	1955		ICE	Naustvik, 'Arnestr., NW. Iceland	NA	NA	C. groenlandica s.l.	2	14	14	0	n		65.9759	-21.4947	c.e.
00400	Cyto-genetical studies in the Cochlearia officinalis complex	Saunte, L.H.	1955		ICE	Naustvik, Reykjafjördur, NW. Iceland	NA	NA	C. groenlandica s.l.	2	14	14	0	n		65.9759	-21.4947	c.e.
00401	Cyto-genetical studies in the Cochlearia officinalis complex	Saunte, L.H.	1955		DK	Boserup, Sjælland	NA	NA	C. officinalis	4	24	28	6	y		55.6656	12.0149	c.e.
00402	Cyto-genetical studies in the Cochlearia officinalis complex	Saunte, L.H.	1955		DK	Ejby strand, Hornsherred, Sjælland	NA	NA	C. officinalis	4	24	28	6	y		55.687	11.8384	c.e.
00404	Cyto-genetical studies in the Cochlearia officinalis complex	Saunte, L.H.	1955		DK	Svinklöv kridtklint, Jylland	NA	NA	C. officinalis	4	24	28	6	y		57.154	9.32751	c.e.
00405	Cyto-genetical studies in the Cochlearia officinalis complex	Saunte, L.H.	1955		NOR	Alta, N. Norway	NA	NA	C. officinalis	4	24	28	6	y		69.9681	23.2704	c.e.
00406	Cyto-genetical studies in the Cochlearia officinalis complex	Saunte, L.H.	1955		NOR	Talvik, N. Norway	NA	NA	C. officinalis	4	24	28	6	y		70.0426	22.9517	c.e.
00407	Cyto-genetical studies in the Cochlearia officinalis complex	Saunte, L.H.	1955		UK	Ben Bulben, County Sligo, NW. Ireland	NA	NA	C. officinalis	4	24	28	6	y		54.3649	-8.47418	c.e.
00408	Cyto-genetical studies in the Cochlearia officinalis complex	Saunte, L.H.	1955		UK	Black Head, County Clare, W. Ireland	NA	NA	C. officinalis	4	24	28	6	y		53.1539	-9.26495	c.e.
00409	Cyto-genetical studies in the Cochlearia officinalis complex	Saunte, L.H.	1955		UK	Lauragh, Kenmare, SW. Ireland	NA	NA	C. officinalis	4	24	28	6	y		51.7672	-9.76998	c.e.
00410	Cyto-genetical studies in the Cochlearia officinalis complex	Saunte, L.H.	1955		UK	Teesdale, Durham, N. England	NA	NA	C. officinalis	4	24	28	6	y		54.6044	-2.01423	c.e.
00413	Die Cochlearia pyrenaica-Gruppe in Zentraleuropa. Ber. Bayer. Bot. Ges. 56: 5-52.	Vogt, R.	1985		GER	Oberbayern: Bei Lungham, 1983	NA	NA	C. bavarica	6	36	36	0	n		47.9667	12.2333	c.e.
00414	Die Cochlearia pyrenaica-Gruppe in Zentraleuropa. Ber. Bayer. Bot. Ges. 56: 5-52.	Vogt, R.	1985		GER	Oberbayern: Freimoos bei Thalham, 1983	NA	NA	C. bavarica	6	36	36	0	n		48.0212	12.2266	c.e.
00415	Die Cochlearia pyrenaica-Gruppe in Zentraleuropa. Ber. Bayer. Bot. Ges. 56: 5-52.	Vogt, R.	1985		GER	Oberbayern: Glonn-Ursprung, 1983	NA	NA	C. bavarica	6	36	36	0	n		47.9919	11.8568	c.e.
00416	Die Cochlearia pyrenaica-Gruppe in Zentraleuropa. Ber. Bayer. Bot. Ges. 56: 5-52.	Vogt, R.	1985		GER	Oberbayern: Hackelleite im Kupferbachtal, 1983	NA	NA	C. bavarica	6	36	36	0	n		47.95	11.8483	c.e.
00417	Die Cochlearia pyrenaica-Gruppe in Zentraleuropa. Ber. Bayer. Bot. Ges. 56: 5-52.	Vogt, R.	1985		GER	Oberbayern: Haslach bei Halfing, 1983	NA	NA	C. bavarica	6	36	36	0	n		47.9	10.3833	c.e.
00418	Die Cochlearia pyrenaica-Gruppe in Zentraleuropa. Ber. Bayer. Bot. Ges. 56: 5-52.	Vogt, R.	1985		GER	Oberbayern: Kühlachen im Kupferbachtal, 1983	NA	NA	C. bavarica	6	36	36	0	n		47.9472	11.8476	c.e.
00419	Die Cochlearia pyrenaica-Gruppe in Zentraleuropa. Ber. Bayer. Bot. Ges. 56: 5-52.	Vogt, R.	1985		GER	Oberbayern: Reisenthal im Kupferbachtal, 1983	NA	NA	C. bavarica	6	36	36	0	n		47.9722	11.8566	c.e.
00420	Die Cochlearia pyrenaica-Gruppe in Zentraleuropa. Ber. Bayer. Bot. Ges. 56: 5-52.	Vogt, R.	1985		GER	Oberbayern: Spielberg im Kupferbachtal, 1983	NA	NA	C. bavarica	6	36	36	0	n		47.9476	11.8483	c.e.
00421	Die Cochlearia pyrenaica-Gruppe in Zentraleuropa. Ber. Bayer. Bot. Ges. 56: 5-52.	Vogt, R.	1985		GER	Oberbayern: Vagen bei Bad Aibling, 1983	NA	NA	C. bavarica	6	36	36	0	n		47.8667	11.8833	c.e.
00422	Die Cochlearia pyrenaica-Gruppe in Zentraleuropa. Ber. Bayer. Bot. Ges. 56: 5-52.	Vogt, R.	1985		GER	Schwaben: Bei der Katzbrui-Mühle, 1983	NA	NA	C. bavarica	6	36	36	0	n		47.9713	10.4547	c.e.
00423	Die Cochlearia pyrenaica-Gruppe in Zentraleuropa. Ber. Bayer. Bot. Ges. 56: 5-52.	Vogt, R.	1985		GER	Schwaben: Boschach-Bach bei Ollartsried, 1983	NA	NA	C. bavarica	6	36	36	0	n		47.9	10.35	c.e.
00424	Die Cochlearia pyrenaica-Gruppe in Zentraleuropa. Ber. Bayer. Bot. Ges. 56: 5-52.	Vogt, R.	1985		GER	Schwaben: Gfällmühle, 1983	NA	NA	C. bavarica	6	36	36	0	n		47.8719	10.4705	c.e.
00425	Die Cochlearia pyrenaica-Gruppe in Zentraleuropa. Ber. Bayer. Bot. Ges. 56: 5-52.	Vogt, R.	1985		GER	Schwaben: Hatzleberg, 1983	NA	NA	C. bavarica	6	36	36	0	n		47.9171	10.3903	c.e.
00426	Die Cochlearia pyrenaica-Gruppe in Zentraleuropa. Ber. Bayer. Bot. Ges. 56: 5-52.	Vogt, R.	1985		GER	Schwaben: Krebsbach bei Klessen, 1983	NA	NA	C. bavarica	6	36	36	0	n		47.9167	10.25	c.e.
00427	Die Cochlearia pyrenaica-Gruppe in Zentraleuropa. Ber. Bayer. Bot. Ges. 56: 5-52.	Vogt, R.	1985		GER	Schwaben: Mindeltal bei Reichartsried, 1983	NA	NA	C. bavarica	6	36	36	0	n		47.9196	10.4493	c.e.
00428	Die Cochlearia pyrenaica-Gruppe in Zentraleuropa. Ber. Bayer. Bot. Ges. 56: 5-52.	Vogt, R.	1985		GER	Schwaben: Mindeltal westlich Mayers, 1983	NA	NA	C. bavarica	6	36	36	0	n		47.904	10.446	c.e.
00429	Die Cochlearia pyrenaica-Gruppe in Zentraleuropa. Ber. Bayer. Bot. Ges. 56: 5-52.	Vogt, R.	1985		GER	Schwaben: Mindeltal westlich Völken, 1983	NA	NA	C. bavarica	6	36	36	0	n		47.9008	10.4504	c.e.
00430	Die Cochlearia pyrenaica-Gruppe in Zentraleuropa. Ber. Bayer. Bot. Ges. 56: 5-52.	Vogt, R.	1985		GER	Schwaben: Schwarzer Graben bei Blöcktach, 1983	NA	NA	C. bavarica	6	36	36	0	n		47.8893	10.5323	c.e.
00431	Die Cochlearia pyrenaica-Gruppe in Zentraleuropa. Ber. Bayer. Bot. Ges. 56: 5-52.	Vogt, R.	1985		AT	in Norischen Alpen zwischen Diesling-See und Eisenhut, ca. 2000 m, 1980 von Lippert & Merxmüller gesammelt, im BoGa München kultiviert	NA	NA	C. excelsa	2	12	12	0	n		46.9513	13.9358	c.e.
00432	Die Cochlearia pyrenaica-Gruppe in Zentraleuropa. Ber. Bayer. Bot. Ges. 56: 5-52.	Vogt, R.	1985		AT	Niederösterreich: Zw. Schmelz b. Annaberg und Ulrichsberg, 1983	NA	NA	C. pyrenaica	2	12	12	0	n		47.8508	15.3899	c.e.
00433	Die Cochlearia pyrenaica-Gruppe in Zentraleuropa. Ber. Bayer. Bot. Ges. 56: 5-52.	Vogt, R.	1985		AT	Steiermark: 7 Quellen im Karlgraben, 1983	NA	NA	C. pyrenaica	2	12	12	0	n		47.6813	15.5629	c.e.
00434	Die Cochlearia pyrenaica-Gruppe in Zentraleuropa. Ber. Bayer. Bot. Ges. 56: 5-52.	Vogt, R.	1985		AT	Steiermark: Bei Niederaipl, 1983	NA	NA	C. pyrenaica	2	12	12	0	n		47.6809	15.416	c.e.
00435	Die Cochlearia pyrenaica-Gruppe in Zentraleuropa. Ber. Bayer. Bot. Ges. 56: 5-52.	Vogt, R.	1985		AT	Steiermark: Haringgraben bei Tragöß, 1983	NA	NA	C. pyrenaica	2	12	12	0	n		47.5426	15.092	c.e.
00436	Die Cochlearia pyrenaica-Gruppe in Zentraleuropa. Ber. Bayer. Bot. Ges. 56: 5-52.	Vogt, R.	1985		FR	Hautes Pyrénées: Val de Campbieil bei Gèdre, 1984	NA	NA	C. pyrenaica	2	12	12	0	n		42.7888	0.056488	c.e.
00437	Die Cochlearia pyrenaica-Gruppe in Zentraleuropa. Ber. Bayer. Bot. Ges. 56: 5-52.	Vogt, R.	1985		GER	Baden-Württemberg: Gommersdorf, 1985	NA	NA	C. pyrenaica	2	12	12	0	n		49.3715	9.61989	c.e.
00438	Die Cochlearia pyrenaica-Gruppe in Zentraleuropa. Ber. Bayer. Bot. Ges. 56: 5-52.	Vogt, R.	1985		GER	Baden-Württemberg: St. Wendel zum Stein, 1985	NA	NA	C. pyrenaica	2	12	12	0	n		49.3706	9.71528	c.e.
00439	Die Cochlearia pyrenaica-Gruppe in Zentraleuropa. Ber. Bayer. Bot. Ges. 56: 5-52.	Vogt, R.	1985		GER	Bayern: An der Zusam zw. Zusmarshausen und Wörleschwang, 1983	NA	NA	C. pyrenaica	2	12	12	0	n		48.4207	10.6002	c.e.
00440	Die Cochlearia pyrenaica-Gruppe in Zentraleuropa. Ber. Bayer. Bot. Ges. 56: 5-52.	Vogt, R.	1985		GER	Bayern: Deisenhausen bei Krummbach, 1984	NA	NA	C. pyrenaica	2	12	12	0	n		48.2503	10.3203	c.e.
00442	Die Cochlearia pyrenaica-Gruppe in Zentraleuropa. Ber. Bayer. Bot. Ges. 56: 5-52.	Vogt, R.	1985		GER	Bayern: Griesmühle bei Enzendorf, 1983	NA	NA	C. pyrenaica	2	12	12	0	n		49.5878	11.46	c.e.
00443	Die Cochlearia pyrenaica-Gruppe in Zentraleuropa. Ber. Bayer. Bot. Ges. 56: 5-52.	Vogt, R.	1985		GER	Bayern: Mergertsmühle bei Schrobenhausen, 1983	NA	NA	C. pyrenaica	2	12	12	0	n		48.5867	11.3378	c.e.
00444	Die Cochlearia pyrenaica-Gruppe in Zentraleuropa. Ber. Bayer. Bot. Ges. 56: 5-52.	Vogt, R.	1985		GER	Bayern: Mühltal am Waginger See, 1983	NA	NA	C. pyrenaica	2	12	12	0	n		47.9667	12.7167	c.e.
00445	Die Cochlearia pyrenaica-Gruppe in Zentraleuropa. Ber. Bayer. Bot. Ges. 56: 5-52.	Vogt, R.	1985		GER	Bayern: Neulhof bei Aichach, 1983	NA	NA	C. pyrenaica	2	12	12	0	n		48.4033	11.0678	c.e.
00446	Die Cochlearia pyrenaica-Gruppe in Zentraleuropa. Ber. Bayer. Bot. Ges. 56: 5-52.	Vogt, R.	1985		GER	Bayern: Rothbach bei Horgau, 1983	NA	NA	C. pyrenaica	2	12	12	0	n		48.389	10.7022	c.e.
00447	Die Cochlearia pyrenaica-Gruppe in Zentraleuropa. Ber. Bayer. Bot. Ges. 56: 5-52.	Vogt, R.	1985		GER	Bayern: Steingaden-Litzau, 1983	NA	NA	C. pyrenaica	2	12	12	0	n		47.6967	10.8792	c.e.
00448	Die Cochlearia pyrenaica-Gruppe in Zentraleuropa. Ber. Bayer. Bot. Ges. 56: 5-52.	Vogt, R.	1985		GER	Bayern: Thalheim im Röhrbachtal, 1983	NA	NA	C. pyrenaica	2	12	12	0	n		49.4564	11.557	c.e.
00449	Die Cochlearia pyrenaica-Gruppe in Zentraleuropa. Ber. Bayer. Bot. Ges. 56: 5-52.	Vogt, R.	1985		GER	Hessen: Gersfeld i. d. Rhön, 1983, 1983	NA	NA	C. pyrenaica	2	12	12	0	n		50.4705	9.96325	c.e.
00450	Die Gattung Cochlearia L. (Cruciferae) auf der Iberischen Halbinsel. Mitt. Bot. Staatssamml. München 23: 393-421.	Vogt, R.	1987		ES	Spanien: Prov. Guipázcoa; Stadtteil Loyola in San Sebastian, Ufer des Rio Urmea, 1986, VOGT, CATALAN, BAYON & AIZ-PURU (M; Herb. Vogt)	NA	NA	C. aestuaria	2	12	12	0	n		43.3061	-1.96036	c.e.
00451	Die Gattung Cochlearia L. (Cruciferae) auf der Iberischen Halbinsel. Mitt. Bot. Staatssamml. München 23: 393-421.	Vogt, R.	1987		ES	Spanien: Prov. Pontevedra, Peninsula de Grove, Felsen an der Westküste, Silikat, 3m, 13.8.1985, VOGT 4080 & PREM (M; Herb. Vogt)	NA	NA	C. danica	6	42	42	0	n		42.4652	-8.94102	c.e.
00452	Die Gattung Cochlearia L. (Cruciferae) auf der Iberischen Halbinsel. Mitt. Bot. Staatssamml. München 23: 393-421.	Vogt, R.	1987		ES	Prov. Asturias: Pto. de Somiedo, Quellhang oberhalb der Straße ca. 2 km N der Paßhöhe, 1300 m, 1986, VOGT 4774 & BAYON (M, Herb. Vogt); ebendort, 1972, MARTINEZ (MA) . Prov. Lérida: Val d'Arán, Herb. MARCAIS (P) .	NA	NA	C. pyrenaica	2	12	12	0	n		43.0333	-6.23333	c.e.
00457	Något om de skånska Cochlearia-arterna. / Taxonomic problems in aneuploid complexes	Lövkvist, B.	1963	Nordal & Laane 1996	SWE	Bunkeflo 10.6.58	NA	NA	C. officinalis ssp.anglica	8	48	48	-2	y		55.5544	12.9037	c.e.
00458	Något om de skånska Cochlearia-arterna. / Taxonomic problems in aneuploid complexes	Lövkvist, B.	1963	Nordal & Laane 1996	SWE	Bunkeflo 10.6.58	NA	NA	C. officinalis ssp.anglica	8	48	54	6	y		55.5544	12.9037	c.e.
00459	Något om de skånska Cochlearia-arterna. / Taxonomic problems in aneuploid complexes	Lövkvist, B.	1963	Nordal & Laane 1996	SWE	Bunkeflo 10.6.58	NA	NA	C. officinalis ssp.anglica	10	60	60	0	n		55.5544	12.9037	c.e.
00460	Något om de skånska Cochlearia-arterna. / Taxonomic problems in aneuploid complexes	Lövkvist, B.	1963	Nordal & Laane 1996	SWE	Brunnby, Kullaberg 5.5.61	NA	NA	C. officinalis ssp. officinalis	4	24	24	0	n		56.2603	12.5747	c.e.
00461	Något om de skånska Cochlearia-arterna. / Taxonomic problems in aneuploid complexes	Lövkvist, B.	1963	Nordal & Laane 1996	SWE	V. Karup Påarp 5.5.61	NA	NA	C. officinalis ssp. officinalis	4	24	24	0	n		56.4234	12.7007	c.e.
00462	Något om de skånska Cochlearia-arterna. / Taxonomic problems in aneuploid complexes	Lövkvist, B.	1963	Nordal & Laane 1996	SWE	Brunnby, Kullaberg 15.5.62	NA	NA	C. officinalis ssp. officinalis	4	24	28	0	n		56.2603	12.5747	c.e.
00463	Något om de skånska Cochlearia-arterna. / Taxonomic problems in aneuploid complexes	Lövkvist, B.	1963	Nordal & Laane 1996	SWE	Fjällkinge, Trolle-Ljungby 27.6.63	NA	NA	C. hybrid / introgressed	6	24	36	12	y		56.044	14.2755	c.e.
00464	Något om de skånska Cochlearia-arterna. / Taxonomic problems in aneuploid complexes	Lövkvist, B.	1963	Nordal & Laane 1996	SWE	V. Karaby, Dösjebro 31.5.63	NA	NA	C. hybrid / introgressed	6	42	42	0	n		55.82	13.0305	c.e.
00465	Något om de skånska Cochlearia-arterna. / Taxonomic problems in aneuploid complexes	Lövkvist, B.	1963	Nordal & Laane 1996	SWE	Barsebäck 31.5.63	NA	NA	C. officinalis ssp.anglica	8	48	49	1	y		55.7717	12.9564	c.e.
00466	Något om de skånska Cochlearia-arterna. / Taxonomic problems in aneuploid complexes	Lövkvist, B.	1963	Nordal & Laane 1996	SWE	Barsebäck 31.5.63	NA	NA	C. officinalis ssp.anglica	8	48	52	4	y		55.7717	12.9564	c.e.
00467	Något om de skånska Cochlearia-arterna. / Taxonomic problems in aneuploid complexes	Lövkvist, B.	1963	Nordal & Laane 1996	SWE	Barsebäck 31.5.63	NA	NA	C. officinalis ssp.anglica	10	60	59	-1	y		55.7717	12.9564	c.e.
00468	Något om de skånska Cochlearia-arterna. / Taxonomic problems in aneuploid complexes	Lövkvist, B.	1963	Nordal & Laane 1996	SWE	Brunnby, Lerhamn	NA	NA	C. officinalis ssp. officinalis	4	24	27	3	y		56.2564	12.5233	c.e.
00469	Taxonomic delimitation within Cochlearia officinalis s.lat. with particular discussion on the rank of C. anglica (Brassicaceae)	Nordal, I. & Laane, M.M.	1996		DK	Denmark, Amagar 31.5.92 (Pop. IN 2534)	NA	NA	C. off. ssp. off. x ssp. anglica	4	24	30	6	y		55.6118	12.6036	c.e.
00470	Taxonomic delimitation within Cochlearia officinalis s.lat. with particular discussion on the rank of C. anglica (Brassicaceae)	Nordal, I. & Laane, M.M.	1996		SWE	Sweden, Skåne, Skanör 31.5.92 (Pop 2535)	NA	NA	C. officinalis ssp. anglica	8	48	48	0	n		55.4077	12.845	c.e.
00471	Taxonomic delimitation within Cochlearia officinalis s.lat. with particular discussion on the rank of C. anglica (Brassicaceae)	Nordal, I. & Laane, M.M.	1996		SWE	Sweden, Skåne, Skanör 31.5.92 (Pop 2535)	NA	NA	C. officinalis ssp. anglica	6	24	37	13	y		55.4077	12.845	c.e.
00472	Taxonomic delimitation within Cochlearia officinalis s.lat. with particular discussion on the rank of C. anglica (Brassicaceae)	Nordal, I. & Laane, M.M.	1996		SWE	Sweden, Skåne, Brunnby, Kullen 1.6.92 (Pop. 2536)	NA	NA	C. officinalis ssp. officinalis	4	24	29	5	y		56.2603	12.5747	c.e.
00473	Taxonomic delimitation within Cochlearia officinalis s.lat. with particular discussion on the rank of C. anglica (Brassicaceae)	Nordal, I. & Laane, M.M.	1996		NL	The Netherlands, Eenerstukken, seeds collected by DMP 4.7.89 (Pop. IN 2554)	NA	NA	C. officinalis ssp. officinalis	4	24	24	0	n		53.0833	6.4	c.e.
00474	Taxonomic delimitation within Cochlearia officinalis s.lat. with particular discussion on the rank of C. anglica (Brassicaceae)	Nordal, I. & Laane, M.M.	1996		NL	The Netherlands, West Terschelling, seeds collected by DMP 20.7.89 (Pop. IN 2557)	NA	NA	C. officinalis ssp. anglica	8	48	48	0	n		53.3613	5.21599	c.e.
00476	Diploids in the genus Cochlearia. Watsonia 6(3): 188-198.	Gill, J.J.B.	1965		ES	Galicia, Northern Spain	NA	NA	C. aestuaria	2	12	12	0	n		42.8232	-8.26189	c.e.
00477	Diploids in the genus Cochlearia. Watsonia 6(3): 188-198.	Gill, J.J.B.	1965		UK	England, Malham Tarn Field Centre	NA	NA	C. alpina	2	12	12	0	n		54.1011	-2.16381	c.e.
00478	Diploids in the genus Cochlearia. Watsonia 6(3): 188-198.	Gill, J.J.B.	1965		UK	England, Malham Tarn Field Centre	NA	NA	C. alpina	2	12	13	1	y		54.1011	-2.16381	c.e.
00479	Diploids in the genus Cochlearia. Watsonia 6(3): 188-198.	Gill, J.J.B.	1965		UK	England, Malham Tarn Field Centre	NA	NA	C. alpina	2	12	14	2	y		54.1011	-2.16381	c.e.
00480	Diploids in the genus Cochlearia. Watsonia 6(3): 188-198.	Gill, J.J.B.	1965		UK	England, Malham Tarn Field Centre	NA	NA	C. alpina	2	12	15	3	y		54.1011	-2.16381	c.e.
00481	Diploids in the genus Cochlearia. Watsonia 6(3): 188-198.	Gill, J.J.B.	1965		UK	England, Helvellyn	NA	NA	C. alpina	2	12	12	0	n		54.5274	-3.01878	c.e.
00482	Diploids in the genus Cochlearia. Watsonia 6(3): 188-198.	Gill, J.J.B.	1965		UK	England, Helvellyn	NA	NA	C. alpina	2	12	13	1	y		54.5274	-3.01878	c.e.
00483	Diploids in the genus Cochlearia. Watsonia 6(3): 188-198.	Gill, J.J.B.	1965		GER	South-West Westphalia	NA	NA	C. pyrenaica	2	12	12	0	n		50.7773	6.57347	c.e.
00484	Diploids in the genus Cochlearia. Watsonia 6(3): 188-198.	Gill, J.J.B.	1965		RUS	St. Petersburg	NA	NA	C. arctica	2	12	14	0	n		59.9391	30.3525	c.e.	1
00485	Short Notes. Watsonia 8, 395:402	Gill, J.J.B.	1971		UK	East Voe of Skellister, Nesting, Shetland	NA	NA	C. scotica	4	24	26	2	y		60.2786	-1.15894	c.e.
00486	Short Notes. Watsonia 8, 395:402	Gill, J.J.B.	1971		UK	East Voe of Skellister, Nesting, Shetland	NA	NA	C. scotica	4	24	28	4	y		60.2786	-1.15894	c.e.
00487	Short Notes. Watsonia 8, 395:402	Gill, J.J.B.	1971		UK	Scalloway, Shetland	NA	NA	C. scotica	4	24	26	2	y		60.1371	-1.27527	c.e.
00488	Short Notes. Watsonia 8, 395:402	Gill, J.J.B.	1971		UK	Little Green Holm, Orkney	NA	NA	C. scotica	4	24	27	3	y		59.12	-2.8305	c.e.
00489	Short Notes. Watsonia 8, 395:402	Gill, J.J.B.	1971		UK	Muckle Green Holm, Orkney	NA	NA	C. scotica	4	24	24	0	n		59.1279	-2.82977	c.e.
00490	Short Notes. Watsonia 8, 395:402	Gill, J.J.B.	1971		UK	Brock of Borwick, Orkney [also: Broch of Borwick]	NA	NA	C. scotica	4	24	26	2	y		59.0289	-3.35027	c.e.
00491	Short Notes. Watsonia 8, 395:402	Gill, J.J.B.	1971		UK	Ramnageo, Orkney [also: Ramna Geo]	NA	NA	C. scotica	4	24	25	1	y		59.0369	-3.34867	c.e.
00492	Short Notes. Watsonia 8, 395:402	Gill, J.J.B.	1971		UK	Wifes Geo, Orkney	NA	NA	C. scotica	4	24	24	0	n		58.8479	-2.87012	c.e.
00493	Short Notes. Watsonia 8, 395:402	Gill, J.J.B.	1971		UK	S.E. Swona, Orkney	NA	NA	C. scotica	4	24	26	2	y		58.7386	-3.05766	c.e.
00494	Short Notes. Watsonia 8, 395:402	Gill, J.J.B.	1971		UK	Loch Sligachan, Skye	NA	NA	C. scotica	4	24	24	0	n		57.3056	-6.14514	c.e.
00495	Short Notes. Watsonia 8, 395:402	Gill, J.J.B.	1971		UK	Loch Ainort, Skye	NA	NA	C. scotica	4	24	26	2	y		57.2807	-6.05785	c.e.
00496	Short Notes. Watsonia 8, 395:402	Gill, J.J.B.	1971		UK	Broadford Bay, Skye	NA	NA	C. scotica	4	24	24	0	n		57.2418	-5.90259	c.e.
00497	Short Notes. Watsonia 8, 395:402	Gill, J.J.B.	1971		UK	Loch na Dal, Skye	NA	NA	C. scotica	4	24	26	2	y		57.1755	-5.80411	c.e.
00498	Short Notes. Watsonia 8, 395:402	Gill, J.J.B.	1971		UK	Armadale Bay, Skye	NA	NA	C. scotica	4	24	25	1	y		58.5536	-4.07656	c.e.
00499	Short Notes. Watsonia 8, 395:402	Gill, J.J.B.	1971		UK	Barvas, Lewis	NA	NA	C. scotica	4	24	26	2	y		58.3507	-6.51928	c.e.
00500	Short Notes. Watsonia 8, 395:402	Gill, J.J.B.	1971		UK	Garynahine, Lewis	NA	NA	C. scotica	4	24	24	0	n		58.1863	-6.7	c.e.
00501	Short Notes. Watsonia 8, 395:402	Gill, J.J.B.	1971		UK	Butt of Lewis, Lewis	NA	NA	C. scotica	4	24	24	0	n		58.5156	-6.26092	c.e.
00502	Short Notes. Watsonia 8, 395:402	Gill, J.J.B.	1971		UK	Balallan, Lewis	NA	NA	C. scotica	4	24	27	3	y		58.0929	-6.60313	c.e.
00503	Short Notes. Watsonia 8, 395:402	Gill, J.J.B.	1971		UK	Husinish, Harris	NA	NA	C. scotica	4	24	26	2	y		57.9939	-7.10485	c.e.
00505	Short Notes. Watsonia 8, 395:402	Gill, J.J.B.	1971		UK	Loch Scresort, Rhum	NA	NA	C. scotica	4	24	25	1	y		57.0134	-6.27654	c.e.
00506	Short Notes. Watsonia 8, 395:402	Gill, J.J.B.	1971		UK	Melvich Bay, Sutherland	NA	NA	C. scotica	4	24	25	1	y		58.5618	-3.91594	c.e.
00507	Short Notes. Watsonia 8, 395:402	Gill, J.J.B.	1971		UK	Helmsdale, Sutherland	NA	NA	C. scotica	4	24	24	0	n		58.1168	-3.65171	c.e.
00508	Short Notes. Watsonia 8, 395:402	Gill, J.J.B.	1971		UK	Plockton, Ross & Cromarthy	NA	NA	C. scotica	4	24	27	3	y		58.1168	-3.65171	c.e.
00509	Short Notes. Watsonia 8, 395:402	Gill, J.J.B.	1971		UK	Morar, Inverness	NA	NA	C. scotica	4	24	27	3	y		56.9691	-5.8201	c.e.
00510	Biogeographic and biosystematic studies in the genus Cochlearia in Northern Scandinavia. Symb. Bot. Upsal 27(2):83-^93	Nordal et al.	1987		NOR	Finnmark: Alta, Altaosen	NA	NA	"Officinalis group"	4	24	26	2	y		69.9729	23.4216	c.e.
00511	Biogeographic and biosystematic studies in the genus Cochlearia in Northern Scandinavia. Symb. Bot. Upsal 27(2):83-^93	Nordal et al.	1987		NOR	Troms: Gratangen, Gratangsbotn	NA	NA	"Officinalis group"	4	24	26	2	y		68.6688	17.6682	c.e.
00512	Biogeographic and biosystematic studies in the genus Cochlearia in Northern Scandinavia. Symb. Bot. Upsal 27(2):83-^93	Nordal et al.	1987		NOR	Nordland: Narvik, Skjoma	NA	NA	"Officinalis group"	4	24	24	0	n		68.2232	17.45	c.e.
00513	Biogeographic and biosystematic studies in the genus Cochlearia in Northern Scandinavia. Symb. Bot. Upsal 27(2):83-^93	Nordal et al.	1987		NOR	Nordland: Hadsel, Lonkanfjord	NA	NA	"Officinalis group"	4	24	26	2	y		68.5007	15.3218	c.e.
00514	Biogeographic and biosystematic studies in the genus Cochlearia in Northern Scandinavia. Symb. Bot. Upsal 27(2):83-^93	Nordal et al.	1987		NOR	Troms: Storfjord, Skibotn	NA	NA	"Officinalis group"	4	24	24	0	n		69.3913	20.2679	c.e.
00515	Biogeographic and biosystematic studies in the genus Cochlearia in Northern Scandinavia. Symb. Bot. Upsal 27(2):83-^93	Nordal et al.	1987		NOR	Finnmark: Kvalsund, Repparfjord	NA	NA	"Officinalis group"	4	24	28	4	y		70.5099	24.1286	c.e.
00516	Biogeographic and biosystematic studies in the genus Cochlearia in Northern Scandinavia. Symb. Bot. Upsal 27(2):83-^93	Nordal et al.	1987		NOR	Troms: Nordreisa, Sørkjosen	NA	NA	"Officinalis group"	4	24	28	4	y		69.7904	20.9463	c.e.
00517	Biogeographic and biosystematic studies in the genus Cochlearia in Northern Scandinavia. Symb. Bot. Upsal 27(2):83-^93	Nordal et al.	1987		NOR	Troms: Tromsø, Kvaløysletta	NA	NA	"Officinalis group"	4	24	27	3	y		69.6953	18.8709	c.e.
00518	Biogeographic and biosystematic studies in the genus Cochlearia in Northern Scandinavia. Symb. Bot. Upsal 27(2):83-^93	Nordal et al.	1987		NOR	Finnmark: Gamvik, Mehamn	NA	NA	"Officinalis group"	4	24	26	2	y		71.035	27.8517	c.e.
00519	Biogeographic and biosystematic studies in the genus Cochlearia in Northern Scandinavia. Symb. Bot. Upsal 27(2):83-^93	Nordal et al.	1987		NOR	Finnmark: Båtsfjord, Hamningberg	NA	NA	"Officinalis group"	4	24	24	0	n		70.5405	30.6162	c.e.
00520	Biogeographic and biosystematic studies in the genus Cochlearia in Northern Scandinavia. Symb. Bot. Upsal 27(2):83-^93	Nordal et al.	1987		NOR	Nordland: Lurøy, Bukkøy	NA	NA	"Officinalis group"	4	24	26	2	y		66.4391	13.0173	c.e.
00521	Biogeographic and biosystematic studies in the genus Cochlearia in Northern Scandinavia. Symb. Bot. Upsal 27(2):83-^93	Nordal et al.	1987		NOR	Nordland: Skjerstad, Misværfjord	NA	NA	"Officinalis group"	4	24	26	2	y		67.1393	14.9651	c.e.
00522	Biogeographic and biosystematic studies in the genus Cochlearia in Northern Scandinavia. Symb. Bot. Upsal 27(2):83-^93	Nordal et al.	1987		NOR	Nordland: Hamarøy, Korsnes	NA	NA	"Officinalis group"	4	24	24	0	n		68.252	16.0566	c.e.
00523	Biogeographic and biosystematic studies in the genus Cochlearia in Northern Scandinavia. Symb. Bot. Upsal 27(2):83-^93	Nordal et al.	1987		NOR	Nordland: Vågan, Ørsvåg	NA	NA	"Officinalis group"	4	24	27	3	y		68.2138	14.4139	c.e.
00524	Biogeographic and biosystematic studies in the genus Cochlearia in Northern Scandinavia. Symb. Bot. Upsal 27(2):83-^93	Nordal et al.	1987		NOR	Nordland: Vågan, Ørsnes	NA	NA	"Officinalis group"	4	24	26	2	y		68.1998	14.3895	c.e.
00525	Biogeographic and biosystematic studies in the genus Cochlearia in Northern Scandinavia. Symb. Bot. Upsal 27(2):83-^93	Nordal et al.	1987		NOR	Nordland: Vestvågøy, Himmeltind	NA	NA	"Officinalis group"	4	24	24	0	n		68.2164	13.5694	c.e.
00526	Biogeographic and biosystematic studies in the genus Cochlearia in Northern Scandinavia. Symb. Bot. Upsal 27(2):83-^93	Nordal et al.	1987		NOR	Nordland: Vestvågøy, Utakleiv	NA	NA	"Officinalis group"	4	24	27	3	y		68.2114	13.5189	c.e.
00527	Biogeographic and biosystematic studies in the genus Cochlearia in Northern Scandinavia. Symb. Bot. Upsal 27(2):83-^93	Nordal et al.	1987		NOR	Troms: Kvæfjord, Gullesfjordbotn	NA	NA	"Officinalis group"	4	24	26	2	y		68.5321	15.7382	c.e.
00528	Biogeographic and biosystematic studies in the genus Cochlearia in Northern Scandinavia. Symb. Bot. Upsal 27(2):83-^93	Nordal et al.	1987		NOR	Troms: Tromsø, Tromsdalen	NA	NA	"Officinalis group"	4	24	26	2	y		69.6455	18.9968	c.e.
00530	Biogeographic and biosystematic studies in the genus Cochlearia in Northern Scandinavia. Symb. Bot. Upsal 27(2):83-^93	Nordal et al.	1987		NOR	Finnmark: Måsøy, Storstappen	NA	NA	"Officinalis group"	4	24	28	4	y		71.1423	25.3372	c.e.
00531	Biogeographic and biosystematic studies in the genus Cochlearia in Northern Scandinavia. Symb. Bot. Upsal 27(2):83-^93	Nordal et al.	1987		NOR	Finnmark: Måsøy, Gjesvær	NA	NA	"Officinalis group"	4	24	28	4	y		71.0984	25.3756	c.e.
00532	Biogeographic and biosystematic studies in the genus Cochlearia in Northern Scandinavia. Symb. Bot. Upsal 27(2):83-^93	Nordal et al.	1987		NOR	Finnmark: Sør-Varanger, Bugøynes	NA	NA	"Officinalis group"	4	24	24	0	n		69.9718	29.6379	c.e.
00533	Biogeographic and biosystematic studies in the genus Cochlearia in Northern Scandinavia. Symb. Bot. Upsal 27(2):83-^93	Nordal et al.	1987		NOR	Finnmark: Nesseby, Nesseby	NA	NA	"Officinalis group"	4	24	27	3	y		70.1529	28.8639	c.e.
00534	Biogeographic and biosystematic studies in the genus Cochlearia in Northern Scandinavia. Symb. Bot. Upsal 27(2):83-^93	Nordal et al.	1987		NOR	Finnmark: Nesseby, Mortensnes	NA	NA	"Officinalis group"	4	24	26	2	y		70.1306	29.0091	c.e.
00535	Biogeographic and biosystematic studies in the genus Cochlearia in Northern Scandinavia. Symb. Bot. Upsal 27(2):83-^93	Nordal et al.	1987		NOR	Finnmark: Vardø, Vardøhus, ex Reinøya	NA	NA	"Officinalis group"	4	24	27	3	y		70.3911	31.138	c.e.
00536	Biogeographic and biosystematic studies in the genus Cochlearia in Northern Scandinavia. Symb. Bot. Upsal 27(2):83-^93	Nordal et al.	1987		NOR	Finnmark: Sør-Varanger, Gr. Jakobselv	NA	NA	"Officinalis group"	4	24	25	1	y		69.7911	30.7967	c.e.
00537	Cytology and Reproduction in arctic Cochlearia. Sommerfeltia	Nordal, I, Laane, MM	1990		ICE	Iceland: Skaftafellssysla: Ingolfshöfdi	NA	NA	C. groenlandica	2	12	12	0	n		64.0833	-16.122	c.e.
00538	Cytology and Reproduction in arctic Cochlearia. Sommerfeltia	Nordal, I, Laane, MM	1990		ICE	Iceland: Hnuta, S of Djupivogur	NA	NA	C. groenlandica	2	12	12	0	n		64.4015	-15.149	c.e.
00539	Cytology and Reproduction in arctic Cochlearia. Sommerfeltia	Nordal, I, Laane, MM	1990		ICE	Iceland: Hnefill N of Eiriksstadir [Eiriksstadhir]	NA	NA	C. groenlandica	2	14	15	1	y		65.141	-15.4629	c.e.
00540	Cytology and Reproduction in arctic Cochlearia. Sommerfeltia	Nordal, I, Laane, MM	1990		ICE	Iceland: Blönduos	NA	NA	C. groenlandica	2	14	15	1	y		65.6601	-20.2814	c.e.
00541	Cytology and Reproduction in arctic Cochlearia. Sommerfeltia	Nordal, I, Laane, MM	1990		SVAL	Svalbard: Isfjorden, Grumantbyen	NA	NA	C. groenlandica	2	14	15	1	y		78.176	15.1127	c.e.
00542	Cytology and Reproduction in arctic Cochlearia. Sommerfeltia	Nordal, I, Laane, MM	1990		SVAL	Svalbard: Sassenfjorden, Gipsvika	NA	NA	C. groenlandica	2	14	14	0	n		78.4394	16.5732	c.e.
00543	Cytology and Reproduction in arctic Cochlearia. Sommerfeltia	Nordal, I, Laane, MM	1990		SVAL	Svalbard: Nordenskjöldland, Reindalspasset	NA	NA	C. groenlandica	2	14	14	0	n		78.0554	16.9735	c.e.
00544	Cytology and Reproduction in arctic Cochlearia. Sommerfeltia	Nordal, I, Laane, MM	1990		SVAL	Svalbard: Sassen, Fjordnibba	NA	NA	C. groenlandica	2	14	14	0	n		78.3642	17.0163	c.e.
00545	NA (extracted from shown map for Russia, Alaska, Canada, where not already a coord. present from orig. papers)	Nordal, I, Laane, MM	1990		RUS	Russia	NA	NA	NA	2	14	14	0	n		59.0015	152.662	c.e.
00546	NA (extracted from shown map for Russia, Alaska, Canada, where not already a coord. present from orig. papers)	Nordal, I, Laane, MM	1990		RUS	Russia	NA	NA	NA	2	14	14	0	n		59.8704	151.684	c.e.
00547	NA (extracted from shown map for Russia, Alaska, Canada, where not already a coord. present from orig. papers)	Nordal, I, Laane, MM	1990		RUS	Russia	NA	NA	NA	2	14	14	0	n		64.6258	-173.533	c.e.
00548	NA (extracted from shown map for Russia, Alaska, Canada, where not already a coord. present from orig. papers)	Nordal, I, Laane, MM	1990		RUS	Russia	NA	NA	NA	2	14	14	0	n		66.2806	-170.92	c.e.
00549	NA (extracted from shown map for Russia, Alaska, Canada, where not already a coord. present from orig. papers)	Nordal, I, Laane, MM	1990		RUS	Russia	NA	NA	NA	2	14	14	0	n		68.8719	170.284	c.e.
00550	NA (extracted from shown map for Russia, Alaska, Canada, where not already a coord. present from orig. papers)	Nordal, I, Laane, MM	1990		RUS	Russia	NA	NA	NA	2	14	14	0	n		71.196	-179.48	c.e.
00551	NA (extracted from shown map for Russia, Alaska, Canada, where not already a coord. present from orig. papers)	Nordal, I, Laane, MM	1990		CAN	Canada	NA	NA	NA	2	14	14	0	n		76.4293	-120.75	c.e.
00552	NA (extracted from shown map for Russia, Alaska, Canada, where not already a coord. present from orig. papers)	Nordal, I, Laane, MM	1990		CAN	Canada	NA	NA	NA	2	14	14	0	n		75.4277	-115.191	c.e.
00553	NA (extracted from shown map for Russia, Alaska, Canada, where not already a coord. present from orig. papers)	Nordal, I, Laane, MM	1990		CAN	Canada	NA	NA	NA	2	14	14	0	n		67.6843	-76.2993	c.e.
00554	NA (extracted from shown map for Russia, Alaska, Canada, where not already a coord. present from orig. papers)	Nordal, I, Laane, MM	1990		CAN	Canada	NA	NA	NA	2	14	14	0	n		60.8203	-94.4696	c.e.
00565	Evolutionary insights from cytogenetic analyses: the case of Cochlearia L.	R. G. Schulz	2015		DE	Baden-Württemberg, Mauchenmühle near Mühlhausen / Eberhardzell	E.-Pop. 213	HEID112704	C. pyrenaica	2	12	12	0	n		47.9589	9.82778
00566	Evolutionary insights from cytogenetic analyses: the case of Cochlearia L.	R. G. Schulz	2015		DE	Baden-Württemberg, Ochsenhausen	E.-Pop. 214	HEID112698	C. pyrenaica	2	12	12	0	n		48.0508	9.9235
00567	Evolutionary insights from cytogenetic analyses: the case of Cochlearia L.	R. G. Schulz	2015		DE	Baden-Württemberg, Ochsenhausen	E.-Pop. 214	HEID112694	C. pyrenaica	2	12	12	0	n		48.0508	9.9235
00568	Evolutionary insights from cytogenetic analyses: the case of Cochlearia L.	R. G. Schulz	2015		ES	Asturias, between Villar de Vildas and La Pornacal	E.-Pop. 212	HEID112715	C. pyrenaica	2	12	12	0	n		43.0718	-6.33333
00569	Evolutionary insights from cytogenetic analyses: the case of Cochlearia L.	R. G. Schulz	2015		UK	England, Somerset, Cheddar Gorge near Cheddar	E.-Pop. 10	HEID112986	alpina	4	24	na	na	na	1.74781	51.2833	-2.75
00570	Evolutionary insights from cytogenetic analyses: the case of Cochlearia L.	R. G. Schulz	2015		UK	England, Somerset, Cheddar Gorge near Cheddar	E.-Pop. 10	HEID112864	alpina	4	24	na	na	na	1.71224	51.2833	-2.75
00571	Evolutionary insights from cytogenetic analyses: the case of Cochlearia L.	R. G. Schulz	2015		UK	England, Somerset, Cheddar Gorge near Cheddar	E.-Pop. 10	HEID112859	alpina	4	24	na	na	na	1.72005	51.2833	-2.75
00572	Evolutionary insights from cytogenetic analyses: the case of Cochlearia L.	R. G. Schulz	2015		UK	England, Somerset, Cheddar Gorge near Cheddar	E.-Pop. 10	HEID112863	alpina	4	24	27	3	y	1.59771	51.2833	-2.75
00573	Evolutionary insights from cytogenetic analyses: the case of Cochlearia L.	R. G. Schulz	2015		UK	England, Somerset, Cheddar Gorge near Cheddar	E.-Pop. 10	HEID112859	alpina	4	24	na	na	na	1.65697	51.2833	-2.75
00574	Evolutionary insights from cytogenetic analyses: the case of Cochlearia L.	R. G. Schulz	2015		UK	Scotland, Teesdale	E.-Pop. 148	HEID113039	alpina	2	12	na	na	na	0.832527	54.7372	-2.35128
00575	Evolutionary insights from cytogenetic analyses: the case of Cochlearia L.	R. G. Schulz	2015		UK	Scotland, Teesdale	E.-Pop. 148	HEID113042	alpina	2	12	na	na	na	0.858001	54.7372	-2.35128
00576	Evolutionary insights from cytogenetic analyses: the case of Cochlearia L.	R. G. Schulz	2015		UK	Scotland, Teesdale	E.-Pop. 148	NA	alpina	2	12	12	0	n		54.7372	-2.35128
00577	Evolutionary insights from cytogenetic analyses: the case of Cochlearia L.	R. G. Schulz	2015		UK	Scotland, Cairngorm Mountains; Corrie an't snechda	E.-Pop. 153	NA	alpina	4	24	na	na	na	1.70463	57.1068	-3.65908
00578	Evolutionary insights from cytogenetic analyses: the case of Cochlearia L.	R. G. Schulz	2015		UK	Scotland, Cairngorm Mountains; Corrie an't snechda	E.-Pop. 153	HEID113036	alpina	4	24	29	5	y		57.1068	-3.65908
00579	Evolutionary insights from cytogenetic analyses: the case of Cochlearia L.	R. G. Schulz	2015		UK	Scotland, Cairngorm Mountains; Corrie an't snechda	E.-Pop. 153	HEID112910	alpina	4	24	29	5	y		57.1068	-3.65908
00580	Evolutionary insights from cytogenetic analyses: the case of Cochlearia L.	R. G. Schulz	2015		UK	Scotland, Cairngorm Mountains; Corrie an't snechda	E.-Pop. 153	NA	alpina	4	24	29	5	y		57.1068	-3.65908
00581	Evolutionary insights from cytogenetic analyses: the case of Cochlearia L.	R. G. Schulz	2015		UK	England, Ribblesdale (Ingleborough)	E.-Pop. 200	HEID112876	alpina/pyreanaica	2	12	12	0	n	0.751041	54.17	-2.34
00582	Evolutionary insights from cytogenetic analyses: the case of Cochlearia L.	R. G. Schulz	2015		UK	England, Ribblesdale (Ingleborough)	E.-Pop. 200	HEID112878	alpina/pyreanaica	2	12	na	na	na	0.832627	54.17	-2.34
00583	Evolutionary insights from cytogenetic analyses: the case of Cochlearia L.	R. G. Schulz	2015		UK	England, Ribblesdale (Ingleborough)	E.-Pop. 200	HEID112872	alpina/pyreanaica	2	12	na	na	na	0.818613	54.17	-2.34
00584	Evolutionary insights from cytogenetic analyses: the case of Cochlearia L.	R. G. Schulz	2015		UK	England, Ribblesdale (Ingleborough)	E.-Pop. 200	HEID112874	alpina/pyreanaica	2	12	na	na	na	0.825538	54.17	-2.34
00585	Evolutionary insights from cytogenetic analyses: the case of Cochlearia L.	R. G. Schulz	2015		UK	England, Ribblesdale (Ingleborough)	E.-Pop. 200	HEID112877	alpina/pyreanaica	2	12	na	na	na	0.805766	54.17	-2.34
00586	Evolutionary insights from cytogenetic analyses: the case of Cochlearia L.	R. G. Schulz	2015		UK	England, Ribblesdale (Ingleborough)	E.-Pop. 200	HEID112880	alpina/pyreanaica	2	12	na	na	na	0.802669	54.17	-2.34
00587	Evolutionary insights from cytogenetic analyses: the case of Cochlearia L.	R. G. Schulz	2015		UK	Scotland, Hartfell Rig near Moffat	E.-Pop. 203	HEID112850	alpina/pyreanaica	4	24	na	na	na	1.69395	55.4081	-3.40138
00588	Evolutionary insights from cytogenetic analyses: the case of Cochlearia L.	R. G. Schulz	2015		UK	Scotland, Hartfell Rig near Moffat	E.-Pop. 203	NA	alpina/pyreanaica	4	24	na	na	na	1.5299	55.4081	-3.40138
00589	Evolutionary insights from cytogenetic analyses: the case of Cochlearia L.	R. G. Schulz	2015		UK	Scotland, Hartfell Rig near Moffat	E.-Pop. 203	HEID112849	alpina/pyreanaica	4	24	na	na	na	1.52962	55.4081	-3.40138
00590	Evolutionary insights from cytogenetic analyses: the case of Cochlearia L.	R. G. Schulz	2015		UK	Scotland, Hartfell Rig near Moffat	E.-Pop. 203	HEID112987	alpina/pyreanaica	4	24	24	0	n	1.51564	55.4081	-3.40138
00591	Evolutionary insights from cytogenetic analyses: the case of Cochlearia L.	R. G. Schulz	2015		UK	Scotland, Hartfell Rig near Moffat	E.-Pop. 203	HEID112410	alpina/pyreanaica	4	24	24	0	n		55.4081	-3.40138
00592	Evolutionary insights from cytogenetic analyses: the case of Cochlearia L.	R. G. Schulz	2015		UK	Scotland, north of Creetown	E.-Pop. 206	HEID112727	C. anglica	6	24	na	na	na	2.20472	54.8934	-4.38478
00593	Evolutionary insights from cytogenetic analyses: the case of Cochlearia L.	R. G. Schulz	2015		UK	Scotland, Sandyhills, south of Dumfries	E.-Pop. 207	HEID112826	C. anglica	6	24	39	15	y	2.24263	54.8776	-3.72951
00594	Evolutionary insights from cytogenetic analyses: the case of Cochlearia L.	R. G. Schulz	2015		UK	Scotland, Sandyhills, south of Dumfries	E.-Pop. 207	HEID112828	C. anglica	6	24	39	15	y		54.8776	-3.72951
00595	Evolutionary insights from cytogenetic analyses: the case of Cochlearia L.	R. G. Schulz	2015		UK	Scotland, Sandyhills, south of Dumfries	E.-Pop. 207	HEID112831	C. anglica	6	24	38	14	y		54.8776	-3.72951
00596	Evolutionary insights from cytogenetic analyses: the case of Cochlearia L.	R. G. Schulz	2015		UK	Scotland, Cromarthy Firth, Ross.	E.-Pop. 266	HEID112978	C. anglica	4	na	na	na	na	1.55571	57.6167	-4.38333
00597	Evolutionary insights from cytogenetic analyses: the case of Cochlearia L.	R. G. Schulz	2015		UK	Scotland, Cromarthy Firth, Ross.	E.-Pop. 266	HEID112977	C. anglica	4	24	24	0	n		57.6167	-4.38333
00598	Evolutionary insights from cytogenetic analyses: the case of Cochlearia L.	R. G. Schulz	2015		DE	Bayern, Glonn	E.-Pop. 193	HEID112979	C. bavarica	6	36	39	3	y		47.9919	11.8568
00599	Evolutionary insights from cytogenetic analyses: the case of Cochlearia L.	R. G. Schulz	2015		DE	Mariengrotte near Unteregg ( Katzbrui)	E.-Pop. 267	HEID113056	C. bavarica	6	36	na	na	na	2.28155	47.9713	10.4547
00600	Evolutionary insights from cytogenetic analyses: the case of Cochlearia L.	R. G. Schulz	2015		DE	Mariengrotte near Unteregg ( Katzbrui)	E.-Pop. 267	HEID113058	C. bavarica	6	36	na	na	na	2.25927	47.9713	10.4547
00601	Evolutionary insights from cytogenetic analyses: the case of Cochlearia L.	R. G. Schulz	2015		DE	Mariengrotte near Unteregg ( Katzbrui)	E.-Pop. 267	HEID112734	C. bavarica	6	36	36	0	n		47.9713	10.4547
00602	Evolutionary insights from cytogenetic analyses: the case of Cochlearia L.	R. G. Schulz	2015		RO	Eastern Carpathians, Valea Salhoi (Distr. Maramures)	E.-Pop. 139	HEID112995	C. borzeana	8	48	na	0	n	2.60886	47.65	24.983
00603	Evolutionary insights from cytogenetic analyses: the case of Cochlearia L.	R. G. Schulz	2015		RO	Eastern Carpathians, Valea Salhoi (Distr. Maramures)	E.-Pop. 139	HEID112998	C. borzeana	8	48	50	2	y		47.65	24.983
00604	Evolutionary insights from cytogenetic analyses: the case of Cochlearia L.	R. G. Schulz	2015		RO	Muntii (Distr. Maramures)	E.-Pop. 140	HEID106723-5	C. borzeana	8	48	50	2	y	3.09412	47.9	24.5
00605	Evolutionary insights from cytogenetic analyses: the case of Cochlearia L.	R. G. Schulz	2015		RO	Valea Salhoi, Distr. Maramures	E.-Pop. 270	HEID109736-1	C. borzeana	8	48	na	na	na	2.72312	47.65	24.983
00606	Evolutionary insights from cytogenetic analyses: the case of Cochlearia L.	R. G. Schulz	2015		FR	Barbâtre en Noirmoutier (Dép. Vendée)	E.-Pop. 178	NA	C. danica	6	42	42	0	n	1.60462	46.9108	-2.16376
00607	Evolutionary insights from cytogenetic analyses: the case of Cochlearia L.	R. G. Schulz	2015		FR	Barbâtre en Noirmoutier (Dép. Vendée)	E.-Pop. 178	NA	C. danica	6	42	na	na	na	1.58548	46.9108	-2.16376
00608	Evolutionary insights from cytogenetic analyses: the case of Cochlearia L.	R. G. Schulz	2015		FR	Barbâtre en Noirmoutier (Dép. Vendée)	E.-Pop. 178	NA	C. danica	6	42	42	0	n		46.9108	-2.16376
00609	Evolutionary insights from cytogenetic analyses: the case of Cochlearia L.	R. G. Schulz	2015		IS	Iceland (south coast), Stokkseyri	E.-Pop. 210	HEID125643	C. groenlandica/islandica	2	12	na	na	na	0.691295	63.8167	-21.0333
00610	Evolutionary insights from cytogenetic analyses: the case of Cochlearia L.	R. G. Schulz	2015		IS	Iceland (south coast), Stokkseyri	E.-Pop. 210	HEID115632	C. groenlandica/islandica	2	12	12	0	n		63.8167	-21.0333
00611	Evolutionary insights from cytogenetic analyses: the case of Cochlearia L.	R. G. Schulz	2015		AT	Niederösterreich, Moosbrunn	E.-Pop. 21	HEID109697-2	C. macrorrhiza	2	12	12	0	n		48	16.4333
00612	Evolutionary insights from cytogenetic analyses: the case of Cochlearia L.	R. G. Schulz	2015		UK	Scotland, Beinn an Dothaidh	E.-Pop. 162	HEID112894	C. micacea	4	24	na	na	na	1.54334	56.5331	-4.72422
00613	Evolutionary insights from cytogenetic analyses: the case of Cochlearia L.	R. G. Schulz	2015		UK	Scotland, Beinn an Dothaidh	E.-Pop. 162	HEID112892	C. micacea	4	24	na	na	na	1.54722	56.5331	-4.72422
00614	Evolutionary insights from cytogenetic analyses: the case of Cochlearia L.	R. G. Schulz	2015		UK	Scotland, Beinn an Dothaidh	E.-Pop. 162	HEID112895	C. micacea	4	24	na	-1	y	1.54588	56.5331	-4.72422
00615	Evolutionary insights from cytogenetic analyses: the case of Cochlearia L.	R. G. Schulz	2015		UK	Scotland, Beinn an Dothaidh	E.-Pop. 162	HEID112832	C. micacea	4	24	24	0	n		56.5331	-4.72422
00616	Evolutionary insights from cytogenetic analyses: the case of Cochlearia L.	R. G. Schulz	2015		UK	Scotland, Beinn an Dothaidh	E.-Pop. 162	HEID112649	C. micacea	4	24	24	0	n		56.5331	-4.72422
00617	Evolutionary insights from cytogenetic analyses: the case of Cochlearia L.	R. G. Schulz	2015		UK	Scotland, Meall nan Tarmachan, (Ben Lawers region)	E.-Pop. 163	HEID112725	C. micacea	4	24	na	na	na	1.52015	56.5379	-4.29161
00618	Evolutionary insights from cytogenetic analyses: the case of Cochlearia L.	R. G. Schulz	2015		UK	Scotland, Meall nan Tarmachan, (Ben Lawers region)	E.-Pop. 163	HEID112904	C. micacea	4	24	na	na	na	1.73355	56.5379	-4.29161
00619	Evolutionary insights from cytogenetic analyses: the case of Cochlearia L.	R. G. Schulz	2015		UK	Scotland, Meall nan Tarmachan, (Ben Lawers region)	E.-Pop. 163	HEID112903	C. micacea	4	24	na	na	na	1.69343	56.5379	-4.29161
00620	Evolutionary insights from cytogenetic analyses: the case of Cochlearia L.	R. G. Schulz	2015		UK	Scotland, Meall nan Tarmachan, (Ben Lawers region)	E.-Pop. 163	HEID112901	C. micacea	4	24	27	3	y	1.71702	56.5379	-4.29161
00621	Evolutionary insights from cytogenetic analyses: the case of Cochlearia L.	R. G. Schulz	2015		UK	Scotland, Meall nan Tarmachan, (Ben Lawers region)	E.-Pop. 163	HEID112905	C. micacea	4	24	27	3	y		56.5379	-4.29161
00622	Evolutionary insights from cytogenetic analyses: the case of Cochlearia L.	R. G. Schulz	2015		UK	Scotland, Girvan (coast south of Ayr)	E.-Pop. 205	HEID112788	C. officinalis	6	24	39	3	y	2.29466	55.226	-4.86163
00623	Evolutionary insights from cytogenetic analyses: the case of Cochlearia L.	R. G. Schulz	2015		NO	Storfjord, Skibotn (Trs)	E.-Pop. 169	HEID112965	C. officinalis	4	24	na	na	na	1.54986	69.3667	20.2167
00624	Evolutionary insights from cytogenetic analyses: the case of Cochlearia L.	R. G. Schulz	2015		NO	Storfjord, Skibotn (Trs)	E.-Pop. 169	HEID112964	C. officinalis	4	24	25	1	y		69.3667	20.2167
00625	Evolutionary insights from cytogenetic analyses: the case of Cochlearia L.	R. G. Schulz	2015		UK	England, North Somerset, Isle Brean Down west of Weston-Super-Mare	E.-Pop. 144	HEID112835	C. officinalis	6	24	na	0	n		51.3281	-3.03445
00626	Evolutionary insights from cytogenetic analyses: the case of Cochlearia L.	R. G. Schulz	2015		UK	England, North Somerset, Isle Brean Down west of Weston-Super-Mare	E.-Pop. 144	HEID112833	C. officinalis	6	24	36	12	y		51.3281	-3.03445
00627	Evolutionary insights from cytogenetic analyses: the case of Cochlearia L.	R. G. Schulz	2015		UK	Scotland, northern Littleferry	E.-Pop. 150	HEID112846	C. officinalis	4	24	na	na	na	1.60552	56.187	-2.81214
00628	Evolutionary insights from cytogenetic analyses: the case of Cochlearia L.	R. G. Schulz	2015		UK	Scotland, northern Littleferry	E.-Pop. 150	HEID112847	C. officinalis	4	24	25	1	y		56.187	-2.81214
00629	Evolutionary insights from cytogenetic analyses: the case of Cochlearia L.	R. G. Schulz	2015		UK	Scotland, Anstruther	E.-Pop. 151	HEID112824	C. officinalis	4	24	na	na	na	1.47975	56.2412	-2.65139
00630	Evolutionary insights from cytogenetic analyses: the case of Cochlearia L.	R. G. Schulz	2015		UK	Scotland, Anstruther	E.-Pop. 151	HEID112817	C. officinalis	4	24	na	na	na	1.51072	56.2412	-2.65139
00631	Evolutionary insights from cytogenetic analyses: the case of Cochlearia L.	R. G. Schulz	2015		UK	Scotland, Anstruther	E.-Pop. 151	HEID112820	C. officinalis	4	24	25	1	y		56.2412	-2.65139
00632	Evolutionary insights from cytogenetic analyses: the case of Cochlearia L.	R. G. Schulz	2015		UK	Scotland, Culbin Sands	E.-Pop. 155	HEID112663	C. officinalis/scotica	4	24	25	1	y		57.5962	-3.83835
00633	Evolutionary insights from cytogenetic analyses: the case of Cochlearia L.	R. G. Schulz	2015		UK	Scotland, Dunure (coast south of Ayr)	E.-Pop. 204	HEID112772	C. officinalis	4	24	na	na	na	1.43443	55.4055	-4.76123
00634	Evolutionary insights from cytogenetic analyses: the case of Cochlearia L.	R. G. Schulz	2015		UK	Scotland, Dunure (coast south of Ayr)	E.-Pop. 204	HEID112772	C. officinalis	4	24	24	0	n		55.4055	-4.76123
00635	Evolutionary insights from cytogenetic analyses: the case of Cochlearia L.	R. G. Schulz	2015		AT	Niederösterreich; Retzbach valley near Türnitz (Mostviertel)	E.-Pop. 24	HEID112736	C. pyrenaica	2	12	15	3	y		47.8897	15.4677
00636	Evolutionary insights from cytogenetic analyses: the case of Cochlearia L.	R. G. Schulz	2015		AT	Niederösterreich; Molterboden (Mostviertel) between Annaberg and Ulreichsberg	E.-Pop. 26	HEID113013	C. pyrenaica	2	12	12	0	n		47.855	15.3873
00637	Evolutionary insights from cytogenetic analyses: the case of Cochlearia L.	R. G. Schulz	2015		AT	Steiermark; Dobrein (Bez. Mürzzuschlag)	E.-Pop. 28	HEID113032	C. pyrenaica	2	12	12	0	n		47.672	15.4762
00638	Evolutionary insights from cytogenetic analyses: the case of Cochlearia L.	R. G. Schulz	2015		AT	Steiermark; Siebenquellen (Bez. Mürzzuschlag)	E.-Pop. 29	HEID113024	C. pyrenaica	2	12	12	0	n		47.6833	15.5583
00639	Evolutionary insights from cytogenetic analyses: the case of Cochlearia L.	R. G. Schulz	2015		AT	Niederösterreich; Lehen near Lunz (Bez. Scheibbs);	E.-Pop. 32	HEID112750	C. pyrenaica	2	12	12	0	n		47.8362	15.017
00640	Evolutionary insights from cytogenetic analyses: the case of Cochlearia L.	R. G. Schulz	2015		AT	Niederösterreich, between Annaberg und Ulreichsberg (Mostviertel)	E.-Pop. 268	HEID112740	C. pyrenaica	2	12	12	0	n		47.8505	15.3872
00641	Evolutionary insights from cytogenetic analyses: the case of Cochlearia L.	R. G. Schulz	2015		DE	Baden-Württemberg, near Dörzbach (Hohenlohekreis)	E.-Pop. 40	HEID106720	C. pyrenaica	2	12	12	0	n		49.3706	9.71528
00642	Evolutionary insights from cytogenetic analyses: the case of Cochlearia L.	R. G. Schulz	2015		FR	Auvergne (Dép. Cantal), 10 km east of Salers	E.-Pop. 1	HEID112955	C. pyrenaica	2	12	na	na	na	0.78027	45.1277	26.1153
00643	Evolutionary insights from cytogenetic analyses: the case of Cochlearia L.	R. G. Schulz	2015		FR	Auvergne (Dép. Cantal), 10 km east of Salers	E.-Pop. 1	HEID112956	C. pyrenaica	2	12	na	na	na	0.775374	45.1277	26.1153
00644	Evolutionary insights from cytogenetic analyses: the case of Cochlearia L.	R. G. Schulz	2015		FR	Auvergne (Dép. Cantal), 10 km east of Salers	E.-Pop. 1	HEID112957	C. pyrenaica	2	12	na	na	na	0.802647	45.1277	26.1153
00645	Evolutionary insights from cytogenetic analyses: the case of Cochlearia L.	R. G. Schulz	2015		FR	Auvergne (Dép. Cantal), 10 km east of Salers	E.-Pop. 1	Heid112962	C. pyrenaica	2	12	na	na	na	0.8058	45.1277	26.1153
00646	Evolutionary insights from cytogenetic analyses: the case of Cochlearia L.	R. G. Schulz	2015		FR	Auvergne (Dép. Cantal), 10 km east of Salers	E.-Pop. 1	HEID112959	C. pyrenaica	2	12	na	na	na	0.802714	45.1277	26.1153
00649	Evolutionary insights from cytogenetic analyses: the case of Cochlearia L.	R. G. Schulz	2015		UK	England, Malham	E.-Pop. 199	HEID112868	C. pyrenaica	2	12	13	1	y	0.814958	54.1	-2.175
00650	Evolutionary insights from cytogenetic analyses: the case of Cochlearia L.	R. G. Schulz	2015		UK	England, Malham	E.-Pop. 199	HEID112870	C. pyrenaica	2	12	na	na	na	0.874603	54.1	-2.175
00651	Evolutionary insights from cytogenetic analyses: the case of Cochlearia L.	R. G. Schulz	2015		UK	England, Malham	E.-Pop. 199	HEID112867	C. pyrenaica	2	12	na	na	na		54.1	-2.175
00652	Evolutionary insights from cytogenetic analyses: the case of Cochlearia L.	R. G. Schulz	2015		UK	England, Nenthead near Alston	E.-Pop. 201	HEID112983	C. pyrenaica	2	12	14	2	y		54.7858	-2.34145
00653	Evolutionary insights from cytogenetic analyses: the case of Cochlearia L.	R. G. Schulz	2015		UK	Scotland, Yorkshire Dales, Greenhow, ~ 12km east of Grassington	E.-Pop. 208	HEID112785	C. pyrenaica	2	12	15	3	y		54.0736	-1.81844
00654	Evolutionary insights from cytogenetic analyses: the case of Cochlearia L.	R. G. Schulz	2015		UK	Scotland, Burghead	E.-Pop. 156	HEID112803	C. scotica	4	24	28	4	y		57.7041	-3.49582
00655	Evolutionary insights from cytogenetic analyses: the case of Cochlearia L.	R. G. Schulz	2015		UK	Scotland, eastern Tairn, Portmahomack;	E.-Pop. 157	HEID112951	C. scotica	4	24	na	na	na	1.65883	57.7041	-3.49582
00656	Evolutionary insights from cytogenetic analyses: the case of Cochlearia L.	R. G. Schulz	2015		UK	Scotland, eastern Tairn, Portmahomack;	E.-Pop. 157	HEID112945	C. scotica	4	24	32	8	y	1.81398	57.7041	-3.49582
00657	Evolutionary insights from cytogenetic analyses: the case of Cochlearia L.	R. G. Schulz	2015		UK	Scotland, Brora	E.-Pop. 158	HEID112934	C. scotica	4	24	na	na	na	1.45181	58.0103	-3.84707
00658	Evolutionary insights from cytogenetic analyses: the case of Cochlearia L.	R. G. Schulz	2015		UK	Scotland, Brora	E.-Pop. 158	HEID112932	C. scotica	4	24	24	0	n	1.4554	58.0103	-3.84707
00659	Evolutionary insights from cytogenetic analyses: the case of Cochlearia L.	R. G. Schulz	2015		UK	Scotland, Brora	E.-Pop. 158	HEID112931	C. scotica	4	24	25	1	y		58.0103	-3.84707
00660	Evolutionary insights from cytogenetic analyses: the case of Cochlearia L.	R. G. Schulz	2015		UK	Scotland, Highland, Sutherland: Achmelvich	E.-Pop. 159	HEID112769	C. scotica	4	24	na	na	na	1.44734	58.1675	-5.31034
00661	Evolutionary insights from cytogenetic analyses: the case of Cochlearia L.	R. G. Schulz	2015		UK	Scotland, Ullapool	E.-Pop. 160	HEID112928	C. scotica	4	24	28	4	y	1.56728	57.9013	-5.16867
00662	Evolutionary insights from cytogenetic analyses: the case of Cochlearia L.	R. G. Schulz	2015		UK	Scotland, Ullapool	E.-Pop. 160	NA	C. scotica	4	24	na	na	na	1.44897	57.9013	-5.16867
00663	Evolutionary insights from cytogenetic analyses: the case of Cochlearia L.	R. G. Schulz	2015		UK	Scotland, Ballachulish	E.-Pop. 161	HEID112937	C. scotica	4	24	na	na	na	1.47913	56.6879	-5.18474
00664	Evolutionary insights from cytogenetic analyses: the case of Cochlearia L.	R. G. Schulz	2015		UK	Scotland, Ballachulish	E.-Pop. 161	HEID112940	C. scotica	4	24	24	0	n		56.6879	-5.18474
00665	Evolutionary insights from cytogenetic analyses: the case of Cochlearia L.	R. G. Schulz	2015		UK	Scotland, Ballachulish	E.-Pop. 161	HEID112656	C. scotica	4	24	24	0	n		56.6879	-5.18474
00666	Evolutionary insights from cytogenetic analyses: the case of Cochlearia L.	R. G. Schulz	2015		UK	Scotland, harbour of Anstruther	E.-Pop. 152	HEID112809	C. spec	6	42	na	na	na	1.47618	56.2212	-2.6985
00667	Evolutionary insights from cytogenetic analyses: the case of Cochlearia L.	R. G. Schulz	2015		UK	Scotland, harbour of Anstruther	E.-Pop. 152	HEID112813	C. spec	6	42	42	0	n		56.2212	-2.6985
00668	Evolutionary insights from cytogenetic analyses: the case of Cochlearia L.	R. G. Schulz	2015		PL	Western Carpathians, Tatra Mts., Mieguszowiecka Przelecz pod Chlopkiem	E.-Pop. 240	HEID112722	C. tatrae	6	42	38	2	y		49.1836	20.065
00669	Evolutionary insights from cytogenetic analyses: the case of Cochlearia L.	R. G. Schulz	2015		SL	Western Carpathians, Tatra Mts., Velicka Dolina	E.-Pop. 145	HEID112992	C. tatrae	6	42	41	-1	y	2.09866	49.15	20.15
00670	Evolutionary insights from cytogenetic analyses: the case of Cochlearia L.	R. G. Schulz	2015		SL	Western Carpathians, Tatra Mts., Velicka Dolina	E.-Pop. 167	HEID108776	C. tatrae	6	42	45	3	y	2.4216	49.15	20.15
00671	Evolutionary insights from cytogenetic analyses: the case of Cochlearia L.	R. G. Schulz	2015		ES	Spain, Asturias, Between Villar de Vildas and La Pornacal	E.-Pop. 212	HEID113053	C. pyrenaica	2	na	na	na	na	0.703706	63.8167	-21.0333
00672	Evolutionary insights from cytogenetic analyses: the case of Cochlearia L.	R. G. Schulz	2015		IS	Iceland: Stokkseyri (South Coast)	E.-Pop. 210	HEID125633	C. officinalis	2	na	na	na	na	0.665715	63.8167	-21.0333
00673	Evolutionary insights from cytogenetic analyses: the case of Cochlearia L.	R. G. Schulz	2015		IS	Iceland: Stokkseyri (South Coast)	E.-Pop. 210	HEID125638	C. officinalis	2	na	na	na	na	0.655715	63.8167	-21.0333
00674	Evolutionary insights from cytogenetic analyses: the case of Cochlearia L.	R. G. Schulz	2015		ES	Spain, Asturias, Between Villar de Vildas and La Pornacal	E.-Pop. 212	HEID113047	C. pyrenaica	2	na	na	na	na	0.737058	63.8167	-21.0333
00675	Evolutionary insights from cytogenetic analyses: the case of Cochlearia L.	R. G. Schulz	2015		Ala	Kodiak Quad.: Kodiak Island, Anton Larson Bay	E.-Pop. 221	Cses_1291	C. sessilifolia	2	na	na	na	na	0.760001	57.8457	-152.627
00678	Evolutionary insights from cytogenetic analyses: the case of Cochlearia L.	R. G. Schulz	2015		Ala	Alaska; Kodiak Quad.: Kodiak Island, Buskin River mouth and lagoon	E.-Pop. 223b	Cses_1292	C. sessilifolia	2	na	na	na	na	0.746754	57.7548	-152.483
