# Supplementary material for: Evolutionary footprints of a cold relic in a rapidly warming world
Source: eLife. 2021 Dec 21;10:e71572. doi: 10.7554/eLife.71572 (PMC8741218; doi:10.7554/eLife.71572)
Supplement: Supplementary file 3. — 2C values are given in picograms (pg). Asterisks (*) indicate progeny from open pollination. Chromosome counts marked with ‘FB’ were made on flower buds, generated by Dr. Martin Lysak and Dr. Terezie Mandáková at the Central European Institute of Technology (CEITEC, Brno). [file elife-71572-supp3.xlsx]

## Sheet: Tabelle1
Supplementary File 3: Results of chromosome counting and/or flow cytometry measurements. 2C values are given in picograms (pg). Asterisks (*) indicate progeny from open pollination. Chromosome counts marked with ‘FB’ were made on flower buds, generated by Dr. Martin Lysak and Dr. Terezie Mandáková at the Central European Institute of Technology (CEITEC, Brno).
Species	Location	Acc.-No.	Herbarium no.	2n	2C (pg)
C. alpina	UK, England, Somerset, Cheddar Gorge near Cheddar	10	HEID112859*	-	1.72 (1)
(2n = 4x = 24)	+51.283333, -2.75 (138 m)		HEID112863*	27	1.60 (2)
			HEID112864*	-	1.71 (1)
			HEID112986*	-	1.75 (2)
	UK, Scotland, Cairngorm Mountains; Corrie an't snechda	153	HEID113036	29	-
	+57.106775, -3.659078 (1013-1134 m)		HEID112910	29	-
			Calp_0828	29-30	-
			Calp_1377	-	1.70 (1)
	UK, Scotland, Hartfell Rig near Moffat	203	HEID112850	-	1.69 (1)
	+55.408057, -3.401385 (714 m) [extr.]		HEID112987	24	1.52 (3)
			HEID112849	-	1.53 (1)
			HEID112410	24	-
			Calp_1352	-	1.53 (1)
C. pyrenaica	UK, England, Teesdale	148	HEID113039	-	0.83 (2)
(2n = 2x = 12)	+54.737165, -2.351277 (621 m)		HEID113042	-	0.86 (1)
			Cpyr_1320	12	-
	UK, England, Ribblesdale (Ingleborough)	200	HEID112876	12	0.75 (1)
	+54.17, -2.34 [extr.]		HEID112872	-	0.82 (1)
			HEID112874	-	0.83 (1)
			HEID112877	-	0.81 (2)
			HEID112878	-	0.83 (3)
			HEID112880	-	0.80 (2)
C. anglica	UK, Scotland, north of Creetown	206	HEID112727	-	2.20 (3)
(2n = 6x = 48)	+54.893354, -4.384783		HEID112416	36 (FB)	-
	→ C. x hollandica?
	UK, Scotland, Sandyhills, south of Dumfries	207	HEID112826	39	2.24 (3)
	+54.877616, -3.729505 (6 m)		HEID112828	39	-
	→ C. x hollandica		HEID112831	39 (38)	-
C. bavarica	DE, Bayern, Glonn	193	HEID112979	38	-
(2n = 6x = 36)	+47.991867, 11.85681
	DE, Mariengrotte near Unteregg (Katzbrui)	267	HEID112734	36	-
	+47.971317, +10.454743 (683 m)		HEID113056	-	2.28 (1)
			HEID113058	-	2.26 (1)
C. borzaeana	RO, Eastern Carpathians, Valea Salhoi (Distr. Maramures)	139	HEID112995	-	2.61 (3)
(2n = 8x = 48)	+47.65, +24.983 [extr.]		HEID112998	50	-
	RO, Muntii (Distr. Maramures)	140	HEID106723-5	50	3.09 (3)
	+47.9, +24.5 [extr.]
	RO Valea Salhoi, Distr. Maramures	270	HEID109736-1	-	2.72 (3)
	+47.65, +24.983 [extr.]
C. danica	FR, Barbâtre en Noirmoutier (Dép. Vendée)	178	Cdan_1314	42	1.60 (1)
(2n = 6x = 42)	+46.910833, -2.163756		Cdan_1315	-	1.59 (1)
			Cdan_1427	42	-
	ES, Carnota (Galicia), Stol Sea Farm in Lira	281	HEID113102	41	1.50 (2)
	+42.798818, -9.150195		HEID113107	-	1.48 (2)
			HEID113108	42	1.51 (2)
		296	HEID113110	42	1.50 (2)
			HEID113111	42	1.49 (2)
		297	HEID113112	42	1.50 (3)
			HEID113115	42	1.50 (2)
	UK, Scotland, harbour of Anstruther	152	HEID112809	-	1.48 (2)
	+56.2212, -2.6985 [extr.]		HEID112813	42	-
C. excelsa	AT, Styria, Seckau Tauern, Mt. Seckauer	274	HEID125644	-	0.87 (3)
(2n = 2x = 12)	Zinken		HEID125645	-	0.86 (2)
	+47.34006, +14.73758 (2299 m)
	AT, Styria, Gurktal Alps, Mt. Eisenhut,	273	HEID125646		0.78 (2)
	Dieslingsee		HEID125647		0.77 (2)
	+46.95134, +13.93578 (2019 m)
C. islandica	IS, Stokkseyri (South Coast)	210	HEID125633	-	0.65 (2)
(2n = 2x = 12)	+63.816667, -21.033333 (0 m)		HEID125638	-	0.65 (2)
			HEID125643	12 (FB)	0.69 (1)
			HEID113122	-	0.77 (3)
			HEID113126	-	0.77 (2)
			HEID115632	12	-
C. macrorrhiza	AT, Niederösterreich, Moosbrunn	21	HEID109697-2	12	-
(2n = 2x = 12)	+48.0 -16.43333 (ca. 200 m)		HEID106724-2	-	0.74 (2)
			HEID109699-1	-	0.75 (2)
C. micacea	UK, Scotland, Beinn an Dothaidh	162	HEID112649	24	-
(2n = 4x = 26)	+56.533072, -4.724218 (743 m)		HEID112832	24	-
			HEID112892	-	1.55 (1)
			HEID112894	-	1.54 (1)
			HEID112895	25	1.55 (1)
	UK, Scotland, Meall nan Tarmachan, (Ben Lawers region)	163	HEID112725	-	1.52 (2)
	+56.53788, -4.291608 (590 m)		HEID112901	27	1.72 (2)
			HEID112903	-	1.69 (1)
			HEID112904	-	1.73 (2)
			HEID112905	27	-
C. officinalis	NO, Storfjord, Skibotn (Trs)	169	HEID112964	≥25	-
(2n = 4x = 24)	+69.366667, +20.216667 (0,5 m)		HEID112965	-	1.55 (3)
	UK, England, North Somerset, Isle Brean Down west of Weston-	144	HEID112835	36/37	-
	Super-Mare		HEID112833	36	-
	+51.3281173, -3.0344457 [extr.]
	→ C. x hollandica?
	UK, Scotland, northern Littleferry	150	HEID112846	-	1.61 (3)
	+56.186968, -2.812142 (5 m)		HEID112847	25	-
	UK, Scotland, Anstruther	151	HEID112817	-	1.50 (4)
	+56.24119, -2.651395 (1 m)		HEID112820	25	-
			HEID112824	-	1.48 (3)
	UK, Scotland, Dunure (coast south of Ayr)	204	HEID112413	26 (FB)	-
	+55.40545, -4.761227 (4 m)		HEID112772	-	1.45 (4)
			HEID112773	24	-
	UK, Scotland, Girvan (coast south of Ayr)	205	HEID112788	39	2.29 (1)
	+55.22599, -4.861633
	→ C. x hollandica
	UK, England, Northumberland, Holy Island	292	HEID006209	-	1.61 (2)
	+55.67876, -1.87443 (1.5 m)
	UK, Scotland, east coast, E Lothian, Dunbar	293	HEID006210	-	1.60 (2)
	+56.00443, -2.51911 (2 m)
	UK, Scotland, Cromarthy Firth, Ross.	266	HEID112977	24	-
	+57.616667, -4.383333		HEID112978	-	1.56 (1)
C. pyrenaica	AT, Niederösterreich; Retzbach valley near Türnitz (Mostviertel)	24	HEID112736	15	-
(2n = 2x = 12)	+47.889667, +15.467667 (525 m)
	AT, Niederösterreich; Molterboden (Mostviertel) between Annaberg and Ulreichsberg	26	HEID113013	12	-
	+47.855, +15.387333 (894 m)
	AT, Steiermark; Dobrein (Bez. Mürzzuschlag)	28	HEID113032	12	-
	+47.671983, +15.4762 (819 m)
	AT, Steiermark; Siebenquellen (Bez. Mürzzuschlag)	29	HEID113024	12	-
	+47.683333, +15.558333 (775 m)
	AT, Niederösterreich; Lehen near Lunz (Bez. Scheibbs);	32	HEID112750	12	-
	+47.836167, +15.017 (581 m)
	AT, Niederösterreich, between Annaberg und Ulreichsberg (Mostviertel)	268	HEID112740	12	-
	+47.8505, +15.387167 (923 m)
	DE, Baden-Württemberg, near Dörzbach (Hohenlohekreis)	40	HEID106720	12	-
	+49.370556, +9.715278 (250 m)
	DE, Baden-Württemberg, Mauchenmühle near Mühlhausen / Eberhardzell	213	HEID112704	12	-
	+47.958889, +9.827778 (583 m)
	DE, Baden-Württemberg, Ochsenhausen	214	HEID112694	12	-
	+48,05083, +9,9235 (610 m)		HEID112698	12	-
	ES, Asturias, between Villar de Vildas and La Pornacal	212	HEID112715	12	-
	+43.071833, -6.333333 (1000 m)		HEID113047	-	0.74 (1)
			HEID113053	-	0.70 (1)
	FR, Auvergne (Dép. Cantal), 10 km east of Salers	1	HEID112955	-	0.78 (1)
	+45.127717, +26.11533 (1526 m)		HEID112956	-	0.78 (1)
			HEID112957	-	0.80 (1)
			HEID112958	12	-
			HEID112959	-	0.80 (2)
			HEID112962	-	0.81 (2)
	SK, Velka Fatra, 1,5km southwest of Rosenberg/Jazierce	33	HEID113006	12	-
	+49.017167, +19.275 (589 m)
	UK, England, Malham	199	HEID112868	13	0.81 (1)
	+54.1, -2.175 [extr.]		HEID112870	-	0.87 (1)
	UK, England, Nenthead near Alston	201	HEID112983	14	-
	+54.785846, -2.341452 (439-465 m)
	UK, Scotland, Yorkshire Dales, Greenhow, ~ 12km east of Grassington	208	HEID112785	15	-
	+54.073593, -1.818443 (348-380 m)
C. scotica	UK, Scotland, Culbin Sands	155	HEID112663	25	-
(2n = 4x = 24)	+57.59621, -3.83835 (1 m)
	UK, Scotland, Burghead	156	HEID112803	28	-
	+57.704068, -3.495818 (5 m)
	UK, Scotland, eastern Tairn, Portmahomack;	157	HEID112945	32	1.81 (1)
	+57.704068, -3.495818 (1 m)		HEID112951	-	1.66 (2)
	UK, Scotland, Brora	158	HEID112931	25	-
	+58.010304, -3.847068 (2 m)		HEID112932	24	1.46 (1)
			HEID112934	-	1.45 (3)
	UK, Scotland, Highland, Sutherland: Achmelvich	159	HEID112769	-	1.45 (1)
	+58.167536, -5.310338		HEID112654	28 (FB)	-
	UK, Scotland, Ullapool	160	HEID112928	28	1.57 (3)
	+57.901323, -5.168667 (1 m)		Cscot_1332	-	1.45 (1)
	UK, Scotland, Ballachulish	161	HEID112937	-	1.48 (3)
	+56.687867, -5.184737 (2 m)		HEID112940	24	-
			HEID112656	24	-
C. sessilifolia	ALA, Kodiak Quad.: Kodiak Island, Anton Larson Bay	221	Cses_1291	-	0.76 (3)
(2n = 2x = 14)	+57.845740, -152.627175 [extr.]
	ALA, Kodiak Quad.: Kodiak Island, Buskin River	223b	Cses_1292	-	0.75 (3)
	mouth and lagoon		Cses_b	14 (FB)	-
	+57.754783, -152.482748 [extr.]
	ALA, Kodiak Island, Buskin River mouth and lagoon	222c	Cses_1807		0.72 (1)
	+57.75529, -152.48523		Cses_1808		0.72 (1)
C. tatrae	PL, Western Carpathians, Tatra Mts., Mieguszowiecka Przelecz pod Chlopkiem	240	HEID112722	38	-
(2n = 6x = 42)	+49.18361, +20.065 [extr.]
	SL, Western Carpathians, Tatra Mts., Velicka Dolina	145	HEID112992	41	2.10 (3)
	+49.15, 20.15 [extr.]
	SL, Western Carpathians, Tatra Mts., Velicka Dolina	167	HEID108776	45	2.42 (3)
	+49.15, 20.15
