# Supplementary material for: Evolutionary footprints of a cold relic in a rapidly warming world
Source: eLife. 2021 Dec 21;10:e71572. doi: 10.7554/eLife.71572 (PMC8741218; doi:10.7554/eLife.71572)
Supplement: Supplementary file 4. — List of publications (and literature cited therein) screened for Cochlearia chromosome counts and/or genome size measurements. [file elife-71572-supp4.xlsx]

## Sheet: Tabelle1
Supplementary File 4: Publications considered for literature review. List of publications (and literature cited therein) screened for Cochlearia chromosome counts and/or genome size measurements.
Author(s)	Year	Included therein
Saunte	1955	Crane and Gairdner(1923), Matsuura and Sutô (1935), Böcher (1938), Maude (1939), Flovik (1940), Löve and Löve (1948), Bajer (1950), Böcher and Larsen (1950), Holmen (1952)
Gill	1965
Gill	1971a	Zhukova (1965), Hedberg (1966), Zhukova (1967)
	1971b
Gill	1973
Gill	1976
Gill et al.	1978
Fearn	1977
Fernández Casas	1975
Elkington	1984
Vogt	1985
Nordal et al.	1986
Vogt	1987	Ludwig (1960), Kakes (1973)
Nodal and Laane	1990
Heubl	1996
Koch et al.	1996
Nordal and Laane	1996	Lövkvist (1963a), Lövkvist (1963b)
Krisai and Greilhuber	1997
Koch et al.	1998
Pegtel	1999
Peer et al.	2003
Kochjarová et al.	2006
Lysák et al.	2009
BrassiBase	2014
