# Supplementary material for: Evolutionary footprints of a cold relic in a rapidly warming world
Source: eLife. 2021 Dec 21;10:e71572. doi: 10.7554/eLife.71572 (PMC8741218; doi:10.7554/eLife.71572)
Supplement: Supplementary file 5. — (1) Correlation between 2C value and chromosome number (full data set, 78 accessions analyzed in total, including putative outliers), (2) Correlation between 2C value and chromosome number excluding Arctic diploids and C. danica as putative outliers (59 individuals, 29 accessions, 11 taxa analyzed in total), (3) Correlation between DNA content per chromosome and total chromosome number (full data set, 78 accessions analyzed in total, including putative outliers), (4) Correlation between DNA content per chromosome and total chromosome number excluding Arctic diploids and C. danica as putative outliers (59 individuals, 29 accessions, 11 taxa analyzed in total). [file elife-71572-supp5.xlsx]

## Sheet: Tabelle1
Supplementary File 5. Rank Correlation Analyses. 1) Correlation between 2C value and chromosome number (full dataset, 78 accessions analyzed in total, including putative outliers), 2) Correlation between 2C value and chromosome number excluding arctic diploids and C. danica as putative outliers (59 individuals, 29 accessions, 11 taxa analyzed in total), 3) Correlation between DNA content per chro…
	Kendall's rank correlation tau	Spearman's rank correlation rho
1) 2C-value / chromosome number	0.603** (P = 2.2e-13)	0.782** (P = 2.7e-17)
2) 2C-value / chromosome number (excluding C. danica and arctic diploids)	0.787** (P = 0)	0.918** (P = 1.4e-24)
3) DNA content per chromosome / chromosome number	-0.542** (P = 5.1e-11)	-0.681** (P = 3.5e-12)
4) DNA content per chromosome / chromosome number (excluding C. danica and arctic diploids)	-0.602** (P = 9.6e-10)	-0.744** (P = 1.4e-11)
