# Supplementary material for: Evolutionary footprints of a cold relic in a rapidly warming world
Source: eLife. 2021 Dec 21;10:e71572. doi: 10.7554/eLife.71572 (PMC8741218; doi:10.7554/eLife.71572)
Supplement: Supplementary file 6. [file elife-71572-supp6.xlsx]

## Sheet: Tabelle1
Lane No.	No.	Species	Lab-ID	Sequencing read data ENA accession numbers	Chloroplast genome Genbank accession number	specimen voucher	Accession-No.	Ploidy	Locality		DNA extracted from	age of plant material	Latitude	Longitude	Altitude	total number of raw reads	sample included in cp genome data analysis (xxx = yes)	sample included in mt data analysis (xxx = yes)	sample included in nc data analysis (xxx = yes)
1	1	C. pyrenaica	Cpyr_0506	ERS1803485	LT629910	HEID BNr.501563, 501564	40	2x	DE	BW: Hohenlohekreis, Dörzbach, Kapelle St. Wendel	living plant	2012-05-01	49.3706	9.71528	250 m	31678292	###	###	###
1	2	C. tatrae	Ctat_1017	ERS1803486	LT629923	HEID BNr.504582	167	6x	SK	West Carpathians, Tatra Mts., Velicka Dolina	living plant	2012-05-01	49.15	20.15	1765 m	31831080	###
1	3	C. macrorrhiza	Cmac_1022	ERS1803487	LT629895	HEID BNr.500824	21	2x	AT	Niederösterreich, Moosbrunn	living plant	2012-05-01	48	16.4333	185 m	37590478	###		###
1	4	C. excelsa	Cexc_0297	ERS1803488	LT629883	HEID BNr.505496	22	2x	AT	Steiermark, Gurktaler Alpen, Eisenhut, Dieslingsee	living plant	2012-05-01	46.9512	13.936	2012 m	43199612	###		###
1	5	C. borzaeana	Cbor_1015	ERS1803489	LT629877	HEID BNr.918229	140	8x	RO	Muntii, Distr. Maramures	living plant	2012-05-01				45488042	###		###
2	2	C. pyrenaica	Cpyr_0699	ERS1803490	LT629912	RBGE Gill Stelle GS8	106	2x	UK	England, Mid-West Yorkshire, Gordale Scar	silica-dried material	not documented (probably 2004/2005)	54.071	-2.13291	300 m	21864610	###	###	###
2	3	C. pyrenaica	Cpyr_0021	ERS1803491	LT629903	HEID BNr.408895-408897	1	2x	FR	Auvergne : Cantal : Mauriac : zw. Roc d Ombres/Puy Violent	silica-dried material	2011-07-06	45.1277	2.61153	1527 m	35425768	###	###	###
2	4	C. groenlandica	Cgro_0474	ERS1803492	LT629885	LG09-S-24: Herb no: O 894768	36	2x	ZN	Svalbard, Bjørndalen	silica-dried material	2009-06-30	78.2237	15.3286	31 m	45988644	###		###
2	5	C. danica	Cdan_0654	ERS1803493	LT629878	EG.MO/LM1-10 (LOM)	85	6x	UK	Scotland, Moray, Lossiemouth	silica-dried material	not documented (probably 2004/2005)	57.723	-3.29463	7 m	48423308	###	###	###
2	6	C. aestuaria	Caes_0741	ERS1803494	LT629869	RBGE Gill Estelle s.n.	138	2x	ES	Asturias, Pesués	silica-dried material	2004-06-07	43.3786	-4.47878	0 m	45317446	###	###	###
2	7	C. anglica	Cang_1023	ERS1803495	LT629874	HEID BNr.915515	168	8x	FR	La Trinité-sur-Mer, "Le Men Du" (56), Dep.: Morbihan	living plant	2012-07-01				47159220	###	###	###
2	8	C. officinalis	Coff_1024	ERS1803496	LT629899	HEID BNr.112610, BNr.112709	169	4x	NO	Trs, Storfjord, Skibotn	living plant	2012-07-01	69.3667	20.2167	289 m	54399518	###	###	###
2	9	C. polonica	Cpol_1016	ERS1803497	LT629902	HEID BNr.500847	166	6x	PL	Pustynia Bledowska near Olkusz	living plant	2012-07-01	50.2833	19.55	332 m	42082700	###	###	###
MiSeq	2x1	I. abulense	Iabu_1074	ERS1803498	LT629929	HEID BNr.500073	195	2n=42	ES	Avila. Herkunft: Gomez Campo Collection Madrid	herbarium voucher	2008-02-01				47835848	###
3	1	C. pyrenaica	Cpyr_1053	ERS1803499	LT629913	M. Ronikier: Sample PYR2-2	173	2x	FR	Pyrenees, Centrale electrique, Chiroulet	silica-dried material	not documented	42.96	0.09	1110 m	34800748	###	###	###
3	2	C. pyrenaica	Cpyr_1058	ERS1803500	LT629914	HEID BNr.914050	170	2x	UA	Verchobuzh	silica-dried material	not documented	49.85	25.1	298 m	39180336	###	###	###
3	3	C. pyrenaica	Cpyr_0106	ERS1803501	LT629904	HEID BNr.501558, BNr.501559	7	2x	CH	Kanton Bern, Kandersteig, NSG Filfalle	silica-dried material	2011-05-10	46.4827	7.67092	1198 m	40297000	###	###	###
3	4	C. pyrenaica	Cpyr_0260	ERS1803502	LN866846	HEID BNr.501471-501473	19	2x	BE	Wallonien, Provinz Lüttich, La Calamine (Kelmis)	silica-dried material	2011-04-19	50.6956	5.99428	207 m	39746612	###	###	###
3	5	C. pyrenaica	Cpyr_0252a	ERS1803503	LT629906	HEID BNr.500855	18	2x	DE	NRW, Almequellen bei Alme nördl. Brilon	silica-dried material	2010-08-22	51.4501	8.62192	345 m	38378518	###	###	###
3	6	C. pyrenaica	Cpyr_0456	ERS1803504	LT629909	HEID BNr. 503877, 503878	34	2x	SK	Velka Fatra, Rosenberg/Jazierce	silica-dried material	2011-06-17	49.002	19.2867	555 m	42588838	###	###	###
3	7	C. groenlandica	Cgro_1038	ERS1803505	LT629886	LG09-S-51: Herb no: O 990848	39	2x	Alas.	Wooly Lagoon	silica-dried material	2009-07-12	64.8552	-166.402	42 m	46035300	###	###	###
3	8	C. pyr. ssp. alpina	Calp_0828	ERS1803506	LT629872	HEID BNr.504205-504207	153	4x	UK	Scotland: Cairngorm Mountains	living plant	2013-07-01	57.1068	-3.65908	1134 m	35113444	###	###	###
3	9	C. borzaeana	Cbor_1063	ERS1803507	LN866844	HEID BNr.501232	270	8x	RO	Valea Salhoi, Distr. Maramures.	living plant	2013-07-01				38195618	###	###	###
3	10	C. pyrenaica	Cpyr_0310	ERS1803508	LT629907	HEID BNr.480392, 480393	24	2x	AT	Niederösterreich; Mostviertel, Traisental, Türnitz	silica-dried material	2011-05-29	47.8941	15.4686	525 m	42047876	###	###	###
4	1	C. danica	Cdan_1067	ERS1803509	LT629879	HEID BNr.503279	194(=178)	6x	FR	Barbâtre en Noirmoutier, "La Fosse" (85) Dep.: Vendée. Corine: 87.2.	living plant	2013-07-01	46.9108	-2.16376		28790506	###	###	###
4	2	C. scotica	Cscot_0963	ERS1803510	LT629919	HEID BNr. 504231	161	4x	UK	Scotland: Ballachulish	living plant	2013-07-01	56.6879	-5.18474	2 m	43354128	###	###	###
4	3	C. officinalis	Coff_1012	ERS1803511	LT629898	HEID BNr.504204	150	4x	UK	Scotland: N-Littleferry,	living plant	2013-07-01	56.187	-2.81214	5 m	44832244	###	###	###
4	4	C. officinalis	Coff_1073	ERS1803512	LT629900	HEID BNr. 500830		4x	DK	Dänemark, Hirtshals	herbarium voucher	1992-08-01	57.5833	9.96667		62985048	###	###	###
4	5	C. micacea	Cmica_0979	ERS1803513	LT629896	HEID BNr.504232-504234	162	4x	UK	Scotland: Beinn an Dothaidh	living plant	2013-07-01	56.5331	-4.72422	743 m	36256744	###	###	###
4	6	I. acaule	Iacau_1072	ERS1803514	LN866848	HEID BNr.504193	196	4x	ES	Gomez Campo Collection Madrid	living plant	2013-07-01				34813968	###
5	1	C. pyrenaica	Calp_1127	ERS1803515	LT629873	HEID BNr. 504851, 504852, 504853	203	4x	UK	Scotland, Moffat, Hartfell Rig	silica-dried material	2013-08-08	55.4108	-3.38809	714 m	43170414	###	###	###
5	2	C. pyrenaica	Cpyr_1211	ERS1803516	LT629915	HEID BNr.503293	212	2x	ES	Asturias, between Villar de Vildas and La Pornacal	silica-dried material	2013-08-02	43.0754	-6.33347	1000 m	59682060	###	###	###
6	1	C. bavarica	Cbav_1207	ERS1803517	LT629875	HEID BNr.912410	193	6x	DE	Bayern, Glonn, Bachlauf, Sägemühle	silica-dried material	2013	47.9919	11.8568	556 m	32714600	###	###	###
6	2	C. bavarica	Cbav_1208	ERS1803518	LT629876	HEID BNr. 500794, 500795	184	6x	DE	Bayern, Immenthal b. Obergünzburg	silica-dried material	2013	47.8262	10.4013	811 m	33941304	###	###	###
6	3	C. pyrenaica	Cpyr_0759	ERS1803519	LT629871	HEID BNr. 504202	148	2x	UK	Scotland, Teesdale, Burnhope Seat	silica-dried material	16.08.2012	54.7372	-2.35128	621 m	39980962	###	###	###
6	4	C. micacea	Cmica_0983	ERS1803520	LT629897	HEID BNr.504235, BNr.504236	163	4x	UK	Ben Lawers	silica-dried material	26.08.2012	56.5379	-4.29161	590 m	37514874	###	###	###
6	5	C. anglica (hollandica)	Cang_1157	ERS1803521	LT629893	HEID BNr. 504856	206	8x	UK	Scotland, nördl. Creetown	silica-dried material	12.08.2013	54.8934	-4.38478	11 m	32979830	###	###	###
6	6	C. islandica	Cisla_1233	ERS1803522	LN866845	HEID BNr.503296-503303	210	2x	IS	Stokkseyri (South Coast)	silica-dried material	August 2013	63.8167	-21.0333		42675556	###	###	###
6	7	C. excelsa	Cexc_1253	ERS1803523	LT629884	HEID BNr.404206	23	2x	AT	Steiermark; Seckauer Tauern, Seckauer Zinken	herbarium voucher	2007	47.34	14.7374	2295 m	38624650	###	###	###
6	8	C. aestuaria	Caes_0160	ERS1803524	LT629868	-	9	2x	ES	Asturias : Ría del Nalón	silica-dried material	not documented	43.5333	-6.06667		33674624	###
6	9	C. scotica	Cscot_1009	ERS1803525	LT629920	HEID BNr.504227, BNr.504228	159	4x	UK	Scotland: Achmelvich	silica-dried material	August 2012	58.1675	-5.31034	8 m	36564630	###	###	###
6	10	C. danica	Cdan_1261	ERS1803526	LT629880	HEID BNr. 500805		6x	DE	Borkum, Westinsel	herbarium voucher	1993	53.9333	6.4		40224188	###	###	###
7	2	C. tatrae	Ctat_1290	ERS1803527	LT629924	HEID BNr.404315	226	6x	SK	Karpaten, Hohe Tatra, Hlinska Dolina	herbarium voucher	2007	49.1778	20.0361	1802 m	58084262	###	###	###
7	3	C. sessilifolia	Cses_1285	ERS1803528	LT629921	ALA accn V170200	223b	2x	Alas.	Kodiak Island, Olds River, head of Kalsin Bay	herbarium voucher	14.09.2010	57.4842	-152.401	202 m	46097314	###	###	###
7	4	C. sessilifolia	Cses_1286	ERS1803529	LT629922	ALA accn V170203	222b	2x	Alas.	Kodiak Island, Buskin River mouth and lagoon	herbarium voucher	13.08.2010	57.7553	-152.485	4 m	73738692	###	###	###
7	5	C. triactylites	Ctri_1287	ERS1803530	LT629926	MT MT00128629	218	2x	CA	Labrador Straits, L'Anse Amour	herbarium voucher	13.10.2004	51.4775	-56,876111	< 15 m	62058762	###	###	###
7	6	C. triactylites	Ctri_1288	ERS1803531	LN866847	MT MT00128446	219	2x	CA	Labrador Straits, Belle Isle, Wreck Cove	herbarium voucher	17.08.2004	51.965	-55,365556	6 m	56594740	###	###	###
7	7	C. officinalis	Coff_1289	ERS1803532	LT629901	HEID BNr.500838	169	4x	NO	Stordal - Trondheimsfjord (Salzwiese)	herbarium voucher	September 1992	63.4667	10,85	0 m	46764176	###
7	8	C. pyrenaica	Cpyr_0560	ERS1803533	LT629911	HEID BNr.921491	43	2x	DE	BW, Allgäu, östlich Isny, NSG Sägeweiher	silica-dried material	11.06.2011	47.6956	10,049722	701 m	56420810	###	###	###
8	1	C. officinalis	Coff_1357	ERS1803534	LT629887	WTU No. 346221	228	2x	RU	Kuril Archipelago: Ushishir Group, Yankicha Island.	herbarium voucher	01.08.1997	47.5071	152.821	32 m	24801808	###	###	###
8	2	C. pyrenaica	Cpyr_0198	ERS1803535	LT629905	HEID BNr.501481, HEID BNr.501482	13	2x	DE	BY : Taching am See, Kalkflachmoor	silica-dried material	03.05.2011	47.9644	12.72	480 m	68389830	###	###	###
8	3	C. groenlandica	Cgro_1366	ERS1803536	LT629890	WTU No. 391011	237	2x	RU	Sakhalin Region: Northeast part of island. East of Piltun Village.	herbarium voucher	18.08.2001	52.6513	143.311	3 m	38059812	###	###	###
8	4	C. groenlandica	Cgro_1367	ERS1803537	LT629891	WTU No. 357862	238	2x	RU	Sakhalin Region: Sakhalin Island; ca. 90 km south of Okha	herbarium voucher	07.08.2003	52.74	143.28	1 m	58824740	###	###	###
8	5	C. triactylites	Ctri_1370	ERS1803538	LT629927	MT00036407	216	2x	CA	Newfoundland; Notre Dame Bay	herbarium voucher	07.08.2001	49.5202	-55.8921	0 m	43598360	###	###	###
8	6	C. groenlandica	Cgro_1364	ERS1803539	LT629888	WTU No. 241894	235	2x	CA	British Columbia: Along Sangan, Graham Island	herbarium voucher	03.06.1957	54.0056	-131.996	32 m	55320316	###	###	###
8	7	C. groenlandica	Cgro_1365	ERS1803540	LT629889	WTU No. 215694	236	2x	CA	British Columbia: Galloway Rapids	herbarium voucher	18.06.1954	54.2545	-130.343	98 m	44069214	###	###	###
8	8	C. tatrae	Ctat_1306	ERS1803541	LT629925	HEID BNr.914047	240	6x	PL	W Carpathians, Tatra Mts	silica-dried material	2015	49.1838	20.0652		56345794	###	###	###
8	9	C. triactylites	Ctri_1371	ERS1803542	LT629928	MT00031432	215	2x	CA	Newfoundland, Bonavista South Dist.; Overs Islands	herbarium voucher	26.08.1997	48.5275	-53.7564	0 m	30355604	###	###	###
9	1	C. islandica	Cisla_1765 (LO.14-4C)	ERS1803543	LT629894	L.N. Olsen LO.14-4; Herb, O	278	2x	IS	Ingòlfshöfði, Austre-Skaftafellssýsla	silica-dried material	13.08.2014	63.804	-16.6378		38251260	###	###	###
9	2	C. alpina	Calp_0165	ERS1803544	LT629870	HEID BNr.503280	10	4x	UK	Somerset, Mendip Hills, Cheddar Gorge	silica-dried material	31.05.2010	51.2844	-2.76111	138 m	64725326	###	###	###
9	3	C. groenlandica	Cgro_1764 (LO.14-9D)	ERS1803545	LT629892	L.N. Olsen LO.14-9; Herb, O	272	2x	IS	Gilsbakkifjall, Skagafjardarssýsla	silica-dried material	15.08.2014	65.3703	-18.9662		33618360	###	###	###
9	4	C. pyrenaica	Cpyr_1442	ERS1803546	LT629916	HEID BNr.504843 - 504846	199	2x	UK	England: Malham, Tarn fen	silica-dried material	06.08.2013	54.1002	-2.17388		55055684	###	###	###
9	5	C. pyrenaica	Cpyr_0396	ERS1803547	LT629908	HEID BNr.480386, 480387	31	2x	AT	Steiermark; Leoben; Hieflau	silica-dried material	30.05.2011	47.6714	14.7663	550 m	68639106	###	###	###
9	6	C. danica	Cdan_1766	ERS1803548	LT629881	-	269	6x	DE	Rheinstetten, B36, Seitenstreifen am Fußgängerübergang	silica-dried material	15.03.2015	48.9625	8.30304	118 m	47433340	###	###	###
9	7	C. pyrenaica	Cpyr_1552	ERS1803549	LT629918	HEID BNr.504847, BNr.504848	201	2x	UK	England: Nenthead bei Alston	silica-dried material	06.08.2013	54.7858	-2.34145		35800552	###	###	###
9	8	I. megalospermum	Imega_1776	ERS1803550	LT629930	HEID BNr.504160	279		ES	Gartenherkunft BG Marburg. ursprünglich Spanien: Prov. Granada, Sierra Nevada, Tal des Rio Laroles	herbarium voucher	June 2012	37.0231	-3.02321		38755672	###	###	###
9	9	C. pyrenaica	Cpyr_1537	ERS1803551	LT629917	HEID BNr.408830	32	2x	AT	Niederösterreich; Scheibbs; Lehen bei Lunz	silica-dried material	30.05.2011	47.8381	15.0173	581 m	41279940	###	###	###
9	10	C. danica	Cdan_1778	ERS1803552	LT629882	HEID BNr.919245	281	6x	ES	Carnota (Galicia), Stol Sea Farm in Lira, boulders behind the fish farm	silica-dried material	13.08.2015	42.7988	-9.1502		65921642	###	###	###
