# Supplementary material for: Evolutionary footprints of a cold relic in a rapidly warming world
Source: eLife. 2021 Dec 21;10:e71572. doi: 10.7554/eLife.71572 (PMC8741218; doi:10.7554/eLife.71572)
Supplement: Supplementary file 7. — For detailed information on selected accessions see Supplementary file 6. [file elife-71572-supp7.xlsx]

## Sheet: Tabelle1
Supplementary File 7. Information on accessions selected for Approximate Bayesian Computation (ABC). For detailed information on selected accessions see Supplementary Data Set 2.
Lab-ID	Accession-No.	distribution range
Cgro_0474	36	ARC
Cgro_1038	39	ARC
Cgro_1764	272	ARC
Cisla_1233	210	ARC
Cisla_1765	278	ARC
Cgro_1357	228	ARC
Cgro_1364	235	ARC
Cgro_1365	236	ARC
Cgro_1366	237	ARC
Cgro_1367	238	ARC
Cses_1285	223b	ARC
Cses_1286	222b	ARC
Caes_0741	138	EUR
Calp_0759	148	EUR
Cexc_0297	22	EUR
Cexc_1253	23	EUR
Cmac_1022	21	EUR
Cpyr_0021	1	EUR
Cpyr_0106	7	EUR
Cpyr_0198	13	EUR
Cpyr_0252a	18	EUR
Cpyr_0260	19	EUR
Cpyr_0310	24	EUR
Cpyr_0396	31	EUR
Cpyr_0456	34	EUR
Cpyr_0506	40	EUR
Cpyr_0560	43	EUR
Cpyr_0699	106	EUR
Cpyr_1053	173	EUR
Cpyr_1058	170	EUR
Cpyr_1211	212	EUR
Cpyr_1442	199	EUR
Cpyr_1537	32	EUR
Cpyr_1552	201	EUR
