# Supplementary material for: Evolutionary footprints of a cold relic in a rapidly warming world
Source: eLife. 2021 Dec 21;10:e71572. doi: 10.7554/eLife.71572 (PMC8741218; doi:10.7554/eLife.71572)
Supplement: Supplementary file 8. — Each statistic is an average over 5601 independent contigs. These statistics together with 103 additional summary statistics formed the basis of the coalescent modeling analyses. [file elife-71572-supp8.xlsx]

## Sheet: Tabelle1
Supplementary File 8. Selected population genetic statistics observed for EUR and ARC populations of diploid Cochlearia. Each statistic is an average over 5,601 independent contigs. These statistics together with 103 additional summary statistics formed the basis of the coalescent modelling analyses.
	EUR	ARC
nucleotide diversity per site	0.00363	0.00154
segregating sites per contig	0.34405	0.10641
Watterson's theta	0.07909	0.0285
Tajima's D	-0.43269	-0.36148
Fst	0.0976
dxy per site	0.00363
net divergence per site	0.00105
