# Supplementary material for: Evolutionary footprints of a cold relic in a rapidly warming world
Source: eLife. 2021 Dec 21;10:e71572. doi: 10.7554/eLife.71572 (PMC8741218; doi:10.7554/eLife.71572)
Supplement: Supplementary file 9. — Models explored for the coalescent modeling framework: SI = strict isolation, CM = continuous migration from the population split to the present, OSC = ongoing secondary contact with gene flow starting after population split and continuing up to the present, PSC = past secondary contact with gene flow starting after population split and stopping before the present. The effect of the choice of prior is shown by two different upper bounds of the effective population sizes. [file elife-71572-supp9.xlsx]

## Sheet: Tabelle1
Supplementary File 9. Results of model choice via ABC-RF for four models differing in the history of gene flow. Models explored for the coalescent modelling framework: SI = strict isolation, CM = continuous migration from the population split to the present, OSC = ongoing secondary contact with gene flow starting after population split and continuing up to the present, PSC = past secondary contac…
upper bound of Ne priors	models competed	RF majority vote	ABC-RF posterior probability
400	SI, CM, OSC, PSC	OSC	0.491
	OSC, CM	OSC	0.501
	OSC, PSC	OSC	0.64
	OSC, SI	OSC	0.832
3,000,000	SI, CM, OSC, PSC	PSC	0.576
	PSC, CM	PSC	0.566
	PSC, OSC	PSC	0.484
	PSC, SI	PSC	0.576
