# Supplementary material for: Evolutionary footprints of a cold relic in a rapidly warming world
Source: eLife. 2021 Dec 21;10:e71572. doi: 10.7554/eLife.71572 (PMC8741218; doi:10.7554/eLife.71572)
Supplement: Supplementary file 10. — The upper part shows medians with 5th and 95th percentiles of the approximated posterior distributions. Population sizes (N) in thousands, time (t) in thousands of generations, and migration rates in log10 of the proportion of immigrants per generation. The lower part shows goodness of fit of these parameter estimates from posterior predictive checks (PPCs), as the standardized euclidean distances between observed summary statistics and predicted values. [file elife-71572-supp10.xlsx]

## Sheet: Tabelle1
Supplementary File 10. Parameter estimates for the SI and OSC models with two choices of priors for the effective population sizes (upper bound of N, Nmax). The upper part shows medians with 5th and 95th percentiles of the approximated posterior distributions. Population sizes (N) in thousands, time (t) in thousands of generations, and migration rates in log10 of the proportion of immigrants per …
Parameter	SI; Nmax 400	OSC; Nmax 400	SI; Nmax 3000	OSC; Nmax 3000
N_EUR_recent	276 (53 - 376)	278 (118 - 387)	424 (58 - 2550)	407 (61 - 2594)
N_ARC_recent	233 (62 - 386)	111 (21 - 312)	1420 (137 - 2840)	1616 (96 - 2942)
N_EUR_ancient	337 (217 - 393)	260 (77 - 385)	1057 (175 - 2793)	918 (81 - 2810)
N_ARC_ancient	23 (4 - 164)	12 (3 - 53)	45 (11 - 2057)	31 (9 - 1675)
N_ancestor	66 (28 - 113)	59 (8 - 180)	87 (15 - 231)	87 (14 - 625)
t_EUR_ancient	37 (3 - 101)	104 (12 - 280)	38 (4 - 187)	63 (7 - 286)
t_ARC_ancient	39 (4 - 105)	46 (5 - 251)	42 (4 - 180)	44 (5 - 201)
t_pop_split	65 (19 - 118)	227 (94 - 380)	73 (29 - 209)	119 (39 - 371)
t_mig_stop	NA	101 (10 - 277)	NA	73 (6 - 273)
m_into_EUR_from_ARC	NA	-5.43 (-6.68 to -4.55)	NA	-5.92 (-6.9 to -4.52)
m_into_ARC_from_EUR	NA	-5.58 (-6.76 to -4.28)	NA	-6.17 (-6.9 to -4.64)
PPC euclidean distances to observed data
Mean	22.2	32	38.8	45.1
Median	15.1	16.9	17.9	19.9
standard deviation	26.8	36.3	42.8	47.1
