# Supplementary material for: Evolutionary footprints of a cold relic in a rapidly warming world
Source: eLife. 2021 Dec 21;10:e71572. doi: 10.7554/eLife.71572 (PMC8741218; doi:10.7554/eLife.71572)
Supplement: Supplementary file 11. — Where possible, missing coordinates were extracted (c.e.) based on information of the respective locality, otherwise coordinates are marked as n/a. [file elife-71572-supp11.xlsx]

## Sheet: Tabelle1
Supplementary File 11. Accessions included in the metabolomic analyses with information on their origin and the analyzed sample number (No. Ind.). Where possible, missing coordinates were extracted (c.e.) based on information of the respective locality, otherwise coordinates are marked as n/a.
Species	Run no.	Pop. no.	Locality		Lat	Lon	alt	No. ind.
C. sessilifolia	1	221	US-AK	Kodiak Island, Anton Larson Bay	57.9	-152.6	1 m	2
C. islandica	1	210	IS	Stokkseyri (South Coast)	63.8	-21	0 m	4
C. tatrae	1	145	SK	W Carpathians, Tatra Mts., Velicka Dolina	49.2	20.2	1765 m	6
C. alpina	1	148	UK	Scotland: Teesdale	54.7	-2.4	621 m	3
C. alpina	1	153	UK	Scotland: Cairngorm Mountains; Corrie an't snechda	57.1	-3.7	1134 m	4
C. alpina	1	203	UK	Scotland, Moffat, Hartfell Rig	55.4	-3.4	714 m	4
C. micacea	1	162	UK	Scotland: Beinn an Dothaidh	56.5	-4.7	743 m	4
C. micacea	1	163	UK	Scotland: Meall nan Tarmachan	56.5	-4.3	590 m	4
C. officinalis	1	204	UK	Scotland: Coast south of Ayr; Dunure	55.4	-4.8	4 m	4
C. officinalis	1	169	NO	Trs, Storfjord, Skibotn	69.4	20.3	289 m	4
C. scotica	1	156	UK	Scotland: Burghead, coast	57.7	-3.5	5 m	4
C. x hollandica	1	207	UK	Scotland: Sandyhills, south of Dumfries	54.9	-3.7	6 m	4
C. x hollandica	1	206	UK	Scotland: north of Creetown	54.9	-4.4	11 m	4
C. danica	1	152	UK	Scotland: Anstruther harbor	56.2	-2.7	1 m	4
C. danica	1	269	DE	BW, Rheinstetten, along highway B36	49	8.3	118 m	4
C. scotica	1	159	UK	Scotland: Achmelvich, salt marsh	58.2	-5.3	8 m	4
C. scotica	1	161	UK	Scotland: Ballachulish, salt marsh	56.7	-5.2	2 m	4
C. pyrenaica	1	199	UK	England: Malham Tarn Fen	54.1	-2.2	380 m	4
C. pyrenaica	1	200	UK	England: Ribblesdale, Ingleborough, Rakespring	54.2	-2.4	676 m	3
C. pyrenaica	1	201	UK	England, Alston, Nenthead	54.8	-2.3	449 m	4
C. pyrenaica	1	33	SK	Carpathians, Veľká Fatra National Park, Jazierce	49	19.3	555 m	3
C. pyrenaica	1	212	ES	Asturias, between Villar de Vildas and La Pornacal	43.1	-6.3	1000 m	4
C. pyrenaica	1	32	AT	Lower Austria, Scheibbs, Lunz, Lehen	47.8	15	576 m	4
C. macrorrhiza	1	21	AT	Lower Austria, Moosbrunn	48	16.4	185 m	4
C. bavarica	1	193	DE	Bavaria, Glonn, river Glonn	48	11.9	556 m	3
C. bavarica	1	267	DE	Bavaria, Katzbrui near Unteregg	48	10.5	683 m	4
C. borzaeana	1	140	RO	Carpathians, Distr. Maramures, Muntii	47.7	25	1226 m	4
C. excelsa	2	273	AT	E-Austria, Styria, Gurktal Alps, Eisenhut-Winterthaler Nock	47	13.9	2029 m	3
I. acaule	2	Iacau	n/a	n/a (Gomez Campo Collection Madrid)	n/a	n/a	n/a	5
I. abulense	2	Iabu	ES	Province of Avila	n/a	n/a	n/a	8
I. glastifolium	2	Igla	n/a	n/a (Botanical garden Nantes Mairie)	n/a	n/a	n/a	4
I. glastifolium	2	Igla	n/a	n/a (Botanical garden Copenhagen)	n/a	n/a	n/a	4
I. prolongoi	2	Ipro	n/a	n/a (Gomez Campo Collection Madrid)	n/a	n/a	n/a	8
I. megalospermum	2	Imega	ES	Province of Granada, Sierra Nevada, Rio Laroles valley	37.0 (c.e.)	-3.0 (c.e.)	1155 m (c.e.)	2
