# Supplementary material for: Evolutionary footprints of a cold relic in a rapidly warming world
Source: eLife. 2021 Dec 21;10:e71572. doi: 10.7554/eLife.71572 (PMC8741218; doi:10.7554/eLife.71572)
Supplement: Supplementary file 12. [file elife-71572-supp12.xlsx]

## Sheet: Tabelle1
Supplementary File 12. SPSS output for KMO and Bartlett’s Test.
KMO and Bartlett’s test
Kaiser-Meyer-Olkin Measure of Sampling Adequacy		0.529
Bartlett’s Test of Sphericity	Approx. Chi-Square	1531.82
	df.	171
	Sig.	< .001
