# Supplementary material for: Evolutionary footprints of a cold relic in a rapidly warming world
Source: eLife. 2021 Dec 21;10:e71572. doi: 10.7554/eLife.71572 (PMC8741218; doi:10.7554/eLife.71572)
Supplement: Supplementary file 13. — Compounds were selected for integration based on annotatability (via the reference collection of the Golm Metabolome Database [GMD, http://gmd.mpimp-golm.mpg.de/] using the AMDIS program [Automated Mass Spectral Deconvolution and Identification System; https://www.amdis.net/]) and reproducibility of peak detection throughout the data set. Metabolites are sorted by general compound classes. [file elife-71572-supp13.xlsx]

## Sheet: Tabelle1
Supplementary File 13. List of 40 selected metabolic compounds. Compounds were selected for integration based on annotatability (via the reference collection of the Golm Metabolome Database [GMD, http://gmd.mpimp-golm.mpg.de/] using the AMDIS program [Automated Mass Spectral Deconvolution and Identification System; www.amdis.net/]) and reproducibility of peak detection throughout the dataset. Met…
Compound class	Selected target compounds
Alkaloids	Pseudo-tropine/Tropine #1, Pseudo-tropine/Tropine #2
Amino acids	Alanine, Asparagine, Aspartic acid, Glutamic acid, Glycine, Isoleucine, Proline, Serine, Threonine, Valine
Carbohydrates	Fructose, Unidentified hexose peak 1, Glucose, Glucose,1,6-anhydro-beta, Mannose, myo-Inositol, Disaccharide, Unidentified hexose peak 2, Sucrose
Fatty acids	Hexanoic acid, Octadecanoic acid
Organic acids	2-Ketoglutaric acid, Ascorbic acid, 4-amino butyrate, Caffeic acid, Citric acid, Dehydroascorbic acid, Ferulic acid, Fumaric acid, Glyceric acid, Malic acid, Oxalic acid, Phosphoric acid, Threonic acid
Miscellaneous	1-pyrroline-3-hydroxy-5-carboxylic acid, Ethanolamine
Unknown	RT:19.905 unknown, RT:20.075 unknown
