# Supplementary material for: Evolutionary footprints of a cold relic in a rapidly warming world
Source: eLife. 2021 Dec 21;10:e71572. doi: 10.7554/eLife.71572 (PMC8741218; doi:10.7554/eLife.71572)
Supplement: Supplementary file 14. [file elife-71572-supp14.xlsx]

## Sheet: raw
x	x	x	x	x	x	x	x	Alkaloid	Alkaloid	Amino acid	Amino acid	Amino acid	Amino acid	Amino acid	Amino acid	Amino acid	Amino acid	Amino acid	Amino acid	Carbohydrate	Carbohydrate	Carbohydrate	Carbohydrate	Carbohydrate	Carbohydrate	Carbohydrate	Carbohydrate	Carbohydrate	Fatty acid	Fatty acid	Organic acid	Organic acid	Organic acid	Organic acid	Organic acid	Organic acid	Organic acid	Organic acid	Organic acid	Organic acid	Organic acid	Organic acid	Organic acid	Unk	Unk	Misc.	Misc.
pop	species	run	BNr	treatment	bioclim_cluster	mg extracted	Ribitol (internal standard)	Pseudo-tropine/Tropine #1	Pseudo-tropine/Tropine #2	Alanine	Asparagine	Aspartic acid	Glutamic acid	Glycine	Isoleucine	Proline	Serine	Threonine	Valine	Fructose	Glucopyranose?	Glucose	Glucose, 1,6-anhydro-beta	Mannose	Myo-inositol	Saccharic acid	Sorbose	Sucrose	Hexanoic acid	Octadecanoic acid	2-Ketoglutaric acid	Ascorbic acid	Butanoic acid, 4-amino	Caffeic acid	Citric acid	Dehydroascorbic acid	Ferulic acid	Fumaric acid	Glyceric acid	Malic acid	Oxalic acid	Phosphoric acid	Threonic/Erythronic acid	RT:19.905 unknown	RT:20.075 unknown	1-pyrrline-3-hydroxy-5-carboxylic?	Ethanolamine
21	Cochlearia macrorrhiza	1	BNr 109697-1	control_cold	2	21	3448708	501530	18765	42508	357091	66227	171816	4337	4296	2217285	44940	19601	82693	2731493	568422	14095476	12725	1931121	963532	223812	2409588	139513967	4539	3618	24258	90635	10245	34463	185635	67026	21481	2713	10865	1998938	2923	126245	133064	5179	1029	221334	90599
21	Cochlearia macrorrhiza	1	BNr 109697-1	control_warm	2	21	1212857	18675	14637	25274	67478	3119	54654	1403	285	305534	13405	1907	38557	7267	80575	4112820	182	1634070	189864	70806	3491332	31776645	2128	2345	2125	18204	639	2211	6471	60330	2189	622	10957	131706	5911	139398	159825	883	1079	80115	15440
21	Cochlearia macrorrhiza	1	BNr 109697-1	treatment_cold	2	18	3.65609e+06	741375	133028	64012	176788	666537	1586541	54405	14960	5458324	741876	47936	87124	35930301	5383401	47371788	338192	20248723	20141510	4470449	55159564	286757378	15320	24047	169531	67991	14937	106361	5996462	590609	69992	4951	256272	25260955	117668	3171380	333446	16343	7073	2793711	40815
21	Cochlearia macrorrhiza	1	BNr 109697-1	treatment_warm	2	19	2.33591e+06	288820	54526	32214	112341	19383	60937	2955	1396	1513339	26388	36565	72439	4296812	300932	5553185	16564	2414891	988727	110819	4863429	1.15746e+08	2803	5738	21234	36864	6939	23747	235015	145203	10980	626	9393	1292174	7084	1319818	236714	2910	1552	180259	40977
21	Cochlearia macrorrhiza	1	BNr 109697-2	control_cold	2	43	2516220	171267	20323	100496	14453	52238	1174086	127309	13794	1813020	280401	17014	53924	21801487	4640424	17215806	74163	2980079	3828863	788137	9822841	11176373	9643	6938	436435	232007	17991	63377	4726268	1668000	33203	2921	88834	18984609	166416	1410747	738536	18849	9520	1515641	69194
21	Cochlearia macrorrhiza	1	BNr 109697-2	treatment_cold	2	34	1.88483e+06	539248	84854	61016	383659	722539	2190555	4433	2801	4552863	109673	62830	95242	23969119	2253523	80886136	161985	21367815	8012868	990746	24500129	359178580	5546	9955	30433	43720	14355	53012	329104	359102	17472	2017	39038	7231414	11307	3.02445e+06	308065	6659	2469	350669	114515
21	Cochlearia macrorrhiza	1	BNr 109697-3	control_warm	2	42	1688084	499395	63478	43069	339179	60330	183614	6452	3731	2130071	44832	57309	129784	8900963	515738	17871731	44039	3552170	902365	211510	7964243	242635469	7772	9333	36877	76921	14886	43740	494526	174480	19794	2257	13881	2329388	5230	107871	152489	7242	2830	356439	105049
21	Cochlearia macrorrhiza	1	BNr 109697-3	treatment_warm	2	32	1.63118e+06	281300	48098	25617	306972	44719	95908	4386	1855	1376455	30724	30931	82505	5140025	421876	11376963	37245	1927672	628880	114075	5094690	144848041	4374	6080	20914	49507	12738	31906	328273	146435	14477	1141	9877	1997951	3865	85735	143534	3787	1818	202336	70150
32	Cochlearia pyrenaica	1	BNr 112747	control_cold	2	26	14749731	99710	93794	43095	20427	513996	267208	64733	69895	1020411	144564	160770	238387	5066287	1090827	10733953	123467	142927	1236251	269956	15304670	12445853	18161	45609	131315	96677	16648	57091	10416655	442863	53611	5040	502612	10324684	139327	5248670	310161	11749	7960	2450048	20176
32	Cochlearia pyrenaica	1	BNr 112747	treatment_cold	2	25	1.32876e+07	1262027	417462	146906	544431	4383137	12727732	93265	31181	27364497	2249621	52258	127915	193648338	22985546	604156767	2627718	413266879	93840663	27483315	146535659	4059852844	34340	60902	374323	161678	58301	217303	15533718	1623396	93957	14034	589122	108006369	236448	4480162	652566	26855	20569	4467656	185203
32	Cochlearia pyrenaica	1	BNr 112749	control_warm	2	28	1521040	106268	12120	35919	12264	51084	437841	102288	4965	778392	218913	15301	30013	10373169	2492910	13028323	47138	2825426	1782234	920296	8323820	11606938	6041	6104	277564	187742	9299	38469	2609961	857348	19073	2305	57769	6251664	62081	710858	509915	14350	8177	990841	38532
32	Cochlearia pyrenaica	1	BNr 112749	treatment_warm	2	21	1.54249e+06	101270	10851	37510	12180	68196	390602	66633	6928	541334	146465	18243	32050	7532288	1678695	10817188	76955	2236989	1322686	627299	9717154	7876378	5785	7369	191032	118773	12430	39175	3824644	608350	15705	1572	74508	4350064	43251	874950	387257	10118	8428	663825	24619
32	Cochlearia pyrenaica	1	BNr 112751	control_warm	2	27	1341166	93741	62979	44750	17112	286757	156070	50229	43479	630655	88050	95107	194180	4268302	1108905	6859956	89626	164073	1333943	241385	11909587	13298467	18964	25098	149382	60993	13761	52626	7889998	315391	43346	3737	269278	5561077	118566	3181850	193136	6675	7428	1319519	16575
32	Cochlearia pyrenaica	1	BNr 112751	treatment_warm	2	16	2.73972e+06	61169	62095	26890	12737	184583	128318	52796	23342	421438	86311	62629	167844	3830607	601560	4110578	50223	147778	1144218	274156	7956894	10275516	11254	19706	126836	49627	7602	35993	4962184	232211	42867	2535	145500	5151557	70452	2115866	147064	5364	5558	735049	8976
32	Cochlearia pyrenaica	1	BNr 112753	control_cold	2	46	26255469	105150	114167	37750	12495	330426	168677	92633	34241	780096	139948	92439	182370	5944646	544520	3964284	89507	146080	1476802	367074	7621933	12009407	11579	33669	168205	49385	13755	64392	7712178	427996	67334	3061	234849	6132460	105174	2637924	260727	9883	9378	878841	13599
32	Cochlearia pyrenaica	1	BNr 112753	treatment_cold	2	36	2.21326e+07	2106480	340747	125339	615148	151408	510493	139066	28437	15066813	1155390	36230	119973	48013949	7254341	168881136	447993	77259820	24866020	7674153	101836981	857321345	38633	74994	359298	203478	55623	145995	15502945	1267558	107027	8933	336336	33190641	198330	7306496	951405	21039	12917	5412940	112230
33	Cochlearia pyrenaica	1	BNr 113003	control_cold	2	19	2584032	196929	44137	26319	3272	149415	37957	41598	9267	485138	29161	38571	90495	1224658	941268	2210475	33318	631986	578797	390238	2509481	4170062	2827	6463	54042	24040	8147	11479	5735394	154541	11084	1582	41182	1936268	84541	1012884	46961	3260	1994	1027910	10108
33	Cochlearia pyrenaica	1	BNr 113003	treatment_cold	2	24	1.63307e+06	1826637	254777	118894	26798	834729	1208397	209071	40128	5314806	859383	65521	96695	32475923	5917725	63382766	506143	17922383	24696785	9613661	29148157	498556187	32758	50812	375603	135117	49876	232620	27841105	1004758	109926	13131	797796	40596429	234207	12592064	491162	20015	18468	4912468	47588
33	Cochlearia pyrenaica	1	BNr 113007	control_cold	2	23	1754413	425420	63901	32624	5895	115852	160260	17865	12935	155215	69708	31821	45910	461541	355334	1866831	10257	621222	700479	211584	1659182	10575365	3244	4574	11045	8917	6519	37218	2897469	206359	10429	505	130421	2573767	104926	1153563	44262	6825	5501	552039	10229
33	Cochlearia pyrenaica	1	BNr 113007	treatment_cold	2	23	2.41071e+06	844200	126301	62668	13300	1342588	2506566	72922	28284	1937803	476890	68973	152028	10282187	2776494	19939083	305946	7427942	10585907	4618567	17090190	152204137	15017	34762	137441	70320	15334	54745	8554480	682143	38560	5054	310522	23477752	175230	4416332	293371	12739	8080	2120599	17636
33	Cochlearia pyrenaica	1	BNr 113009	control_warm	2	16	1004333	275565	49353	39810	6377	136690	191781	30100	11314	517678	67287	51272	119943	1864993	897987	3265030	22107	623348	556934	508980	4133797	5997114	4314	15609	22860	35968	9774	46279	7198675	161272	42169	1741	129740	2871347	126947	1540784	165857	3431	7308	954967	5622
33	Cochlearia pyrenaica	1	BNr 113009	treatment_warm	2	23	2.14317e+06	470550	70765	35832	10967	143099	156999	49281	13819	586506	77298	55984	119240	1885213	772725	2972253	33493	550726	970945	382943	3649716	9384821	7861	15773	65549	30570	10867	40732	5932167	213924	36249	1371	118234	3808708	95857	2048245	157689	6929	5568	1132938	12341
140	Cochlearia bavarica	1	BNr 106723-1	control_warm	3	21	1179491	405110	124726	41443	365685	120629	489332	160806	15595	887753	187717	89689	114114	1271868	2597301	799068	149853	585087	1502342	1944259	5557847	6859387	8421	10845	129154	149275	11646	56838	2705603	560859	14104	1649	8339	7076045	43206	1081871	773931	5868	5049	2717900	82464
140	Cochlearia borzaeana	1	BNr 106723-1	treatment_warm	3	31	2.21947e+06	356663	110993	69610	881609	280075	600295	140069	18214	2405824	160490	85667	89229	1756396	3163350	2509313	157195	816028	1622867	1601935	4564741	8514125	7442	15648	171841	118586	9805	59376	3239979	662232	29192	2866	9193	6326961	54894	1204881	607774	5826	9940	2366849	83887
140	Cochlearia borzaeana	1	BNr 106723-2	control_cold	3	39	1665647	185325	33533	16952	506091	129641	54536	37076	239	1046153	11009	15065	35634	301939	2255637	1552646	30669	177733	409583	714693	628791	125337	7653	6830	106050	57729	686	18611	401186	77472	16778	1534	354	3837431	4049	452761	106102	473	861	1095560	56559
140	Cochlearia borzaeana	1	BNr 106723-2	treatment_cold	3	28	1.56501e+06	665770	374226	108560	1643202	500729	2372998	236280	33657	12390311	1063376	50314	86392	19775260	17290159	30744546	1756028	12809583	9680481	10874392	25898918	128493657	14861	46852	345440	326001	29351	117116	5488284	1556281	45902	6528	30530	35651125	92215	1727264	712650	13792	21645	3614108	220741
140	Cochlearia borzaeana	1	BNr 106723-3	control_warm	3	16	1442148	233962	105423	51772	465931	138533	353148	33729	7664	1055878	72741	22654	55940	2308577	785142	1947296	99578	139146	528385	567704	2676515	3702635	4925	10091	83127	53098	4626	23708	1056563	274873	6222	2798	3988	3859527	57877	898323	251083	7554	5431	1598424	66740
140	Cochlearia borzaeana	1	BNr 106723-3	treatment_warm	3	25	1.79722e+06	219089	81752	52883	574518	153659	495926	72185	11030	1633042	84408	48035	84764	1851121	2397990	1962427	150879	399677	993863	842740	2416142	4274834	7817	14994	115455	138030	3477	40416	1934784	308458	16921	2854	4591	5060534	44499	926909	291394	5753	4708	2317610	76564
140	Cochlearia borzaeana	1	BNr 106723-5	control_cold	3	32	1465224	170896	157909	32377	394962	101942	229123	53719	6056	721370	81759	39166	147093	689245	2189621	883584	121007	450916	890976	1842987	6061989	7827262	3640	9382	131137	139188	14954	43854	2608643	406347	7113	1731	2521	2801260	20271	752776	254128	2963	2484	2444722	35111
140	Cochlearia borzaeana	1	BNr 106723-5	treatment_cold	3	29	1.91691e+06	628746	155688	93496	671682	131717	472515	9199	3622	5573850	132683	39356	98518	23383605	1724293	59620203	173422	12748397	3511517	1548505	26856170	19067120	10977	10871	66192	106138	27910	59688	748334	544028	23773	2055	31636	5019047	12553	171743	638647	11495	5368	475874	170454
145	Cochlearia tatrae	1	BNr 108776	control_cold	3	32	1455159	919832	488287	13644	193301	101564	90869	14832	7926	17923	4244	5627	35252	21308019	3032229	34415150	85077	8378205	4924842	1072938	23247136	7085541	12380	11834	6953	152566	24104	40016	1765079	914838	31738	1750	23495	3932213	35540	2056661	442432	12247	4910	370665	47042
145	Cochlearia tatrae	1	BNr 108776	treatment_cold	3	38	1.50642e+06	628477	710922	50401	357691	2633366	6604116	58857	37031	2225673	520209	108894	152456	48801528	18857822	99707746	1279029	25440869	6220961	6391676	58709834	110096382	24720	69035	35654	268257	24966	138696	7867644	790709	38223	8169	266378	25744400	108338	3737065	575380	24107	16627	1228820	183707
145	Cochlearia tatrae	1	BNr 108776-7	control_cold	3	28	1653188	731075	961243	5677	243732	71976	159982	5084	4390	25177	2874	12452	36346	22077122	5305686	26551278	261327	9828720	5224903	690039	23055969	8849243	22402	10530	10058	123226	22663	37479	4063687	850816	17868	2320	26495	4381291	20654	2034847	328551	14096	8923	787676	70604
145	Cochlearia tatrae	1	BNr 112722	treatment_cold	3	35	2.12077e+06	1564659	1986030	60275	458179	323644	966620	45735	21049	487798	195475	14209	46461	139516923	24801196	512594673	1871917	219094811	79185190	15963888	216891602	166189492	34960	88655	505929	415650	55776	186856	14225195	1483172	100288	7161	310670	31683622	190352	7150101	1828643	43674	34141	1964705	262042
145	Cochlearia tatrae	1	BNr 112988	control_warm	3	24	240481	11183	17026	23341	76264	65820	123828	38319	7096	782583	245723	40153	28400	2363261	1166981	3962640	82073	636306	649449	362264	2097763	151195488	1003	10361	239925	64019	7146	33410	2666914	398194	32795	788	85373	3136222	100662	745778	121505	7451	2834	547236	18576
145	Cochlearia tatrae	1	BNr 112988	treatment_warm	3	39	497416	9227	11422	19858	84417	39718	83027	38892	5055	873743	146683	23581	30733	1699160	721409	2665697	70063	567320	813652	305836	1679937	1.72209e+08	593	7109	162208	41412	6299	20546	2111296	410094	21595	544	54868	2129512	59088	539969	93173	5988	1711	457232	22176
145	Cochlearia tatrae	1	BNr 112989	control_warm	3	37	292073	8634	12439	19489	169288	139668	177345	37939	7459	1442840	137468	32818	74352	2135563	1091548	1935698	85291	926273	1389420	257074	1941016	7167551	597	10016	167673	47942	8776	24461	3823124	403059	22001	791	97994	3064598	86079	982084	182510	10644	3212	371828	16834
145	Cochlearia tatrae	1	BNr 112989	treatment_warm	3	38	363775	9437	10361	17399	146924	80641	138977	28057	4959	1470471	98303	25491	42743	1649155	974699	2556169	68912	556415	942945	329438	1786460	6018324	392	6100	220171	30924	5694	28916	2299256	386659	16298	439	70728	2620946	49186	796237	107748	8875	2396	491432	17381
145	Cochlearia tatrae	1	BNr 112990	control_cold	3	40	750995	5785	11838	27261	126974	113652	118778	35157	3675	1295821	143079	17140	55921	2479167	750145	3565786	58117	442408	733482	512715	1187249	3721122	581	5818	212947	36997	8500	25686	2050246	232411	17287	502	56727	2444991	71920	784164	115655	13202	2579	308051	23417
145	Cochlearia tatrae	1	BNr 112990	treatment_cold	3	48	720991	15533	21575	33948	227836	482544	1837633	59917	5598	6050935	742649	25590	55101	11248715	5031834	15870476	331881	4068899	5549375	2016109	11033907	125229625	733	8004	242886	45142	16489	50484	3671393	545568	37930	1641	249844	11417647	82270	1062191	141017	10471	3860	786377	40059
145	Cochlearia tatrae	1	BNr 112991	control_cold	3	35	938664	16183	11222	23520	71199	50078	143631	68173	6248	938936	117181	26121	51527	1959673	1140654	2678251	119126	546127	1392703	403085	1792629	260431089	786	9744	145673	34608	7141	15615	3623529	695126	16850	994	80738	3594578	71147	639039	107658	7425	1726	782192	21028
145	Cochlearia tatrae	1	BNr 112991	treatment_cold	3	32	891804	84855	38982	21791	227374	302906	539270	72033	10026	5962631	673708	27160	51147	20082627	7546844	37909638	475334	10988721	13590188	5336140	17964741	416940542	5300	24752	346701	79806	9255	93130	4830501	1047390	36242	3838	393216	22569460	148004	1866308	324091	17412	11599	871610	55670
148	Cochlearia pyrenaica/ alpina	1	BNr 113037	control_cold	4	28	534262	827325	230320	201654	160317	70689	63748	254305	6589	1975209	141579	4410	11051	19578665	8786177	32056518	708335	11110141	17523620	3346274	23347539	175605936	9475	35042	110695	115974	2228	128308	6034643	1165377	26306	7826	248859	10876081	122633	1607861	428188	10254	13293	833069	50409
148	Cochlearia pyrenaica/ alpina	1	BNr 113037	treatment_cold	4	29	761534	79031	20174	22581	85040	1082399	2480242	37644	7782	3206240	353737	19929	52540	8530523	6521739	15349264	366348	7600070	10807859	1847319	14298599	120373995	6013	11866	162892	76965	9080	96686	3229483	1299903	30830	1836	275216	10499460	113663	1069196	274378	10016	18296	679603	50264
148	Cochlearia pyrenaica/ alpina	1	BNr 113038	control_warm	4	44	396911	136016	25503	3538	182917	529013	222250	9341	2957	622092	117135	2659	7916	2693304	781598	4203435	56671	957551	3553961	278718	8413425	6022463	5562	16724	64328	63942	1980	103983	2158060	1672672	32417	930	102329	612507	116162	1606117	194919	5757	8357	326853	19572
148	Cochlearia pyrenaica/ alpina	1	BNr 113038	treatment_warm	4	41	667665	102661	20868	4488	112437	448129	171005	11268	3320	432718	143791	1811	9641	2498074	700458	2992741	57312	570792	3527372	295088	5774950	7219599	4263	14989	66278.8	40863	2180	90643	2539764	1184951	29236	1110	96556	776626	74356	1080748	168311	6254	10757	197379	25970
148	Cochlearia pyrenaica/ alpina	1	BNr 113041	control_cold	4	31	770481	966631	410922	156683	86561	87741	78272	264129	6078	2510757	206239	5196	13569	11366789	6205065	26795638	562700	8549299	31558357	2388037	18495038	145708690	9261	35200	93332	68582	1799	84947	10240648	927839	19106	7244	155420	15575622	116294	1236722	697673	6803	13375	670921	53579
148	Cochlearia pyrenaica/ alpina	1	BNr 113041	treatment_cold	4	32	718265	734426	242387	193021	110073	61953	52014	169850	3868	1538869	153523	2998	8083	16000679	5526373	23113433	512990	8984975	23287339	3086744	18017025	108534689	8775	22565	67744.2	70174	1972	85768	6341639	1051656	24774	6636	208098	12609607	118636	1756343	507328	8741	10973	525458	69486
152	Cochlearia danica	1	BNr 112806	control_cold	1	31	1086204	70902	11862	35950	67148	69075	8346	50143	12838	1374563	99648	32998	156992	16929061	554910	9426503	35291	3462983	3233239	36722	13363452	3181191	3843	12447	251067	41812	3152	25321	2069820	511359	22946	1845	109370	2930783	93425	1069077	225690	4315	4416	757365	92858
152	Cochlearia danica	1	BNr 112806	treatment_cold	1	34	992842	65264	80258	49825	135588	485290	115574	61320	23083	5433364	236800	25649	62847	56378851	4060954	99095556	267504	49336028	17567865	622856	102721530	64052534	11598	25219	178830	35428	8779	65626	4410639	840680	25666	2762	205393	17730233	67833	2324182	432627	10166	5652	549727	106591
152	Cochlearia danica	1	BNr 112807	control_warm	1	30	416557	29579	59636	55389	59011	92116	30934	26627	21826	1983247	84026	14184	143904	10372503	1275866	24189766	46629	4537742	1843619	159075	14114133	2692197	5534	30818	248034	52606	7593	84816	2033419	539352	35200	2470	129569	3611945	62079	2324810	162639	4065	8443	540597	133103
152	Cochlearia danica	1	BNr 112807	treatment_warm	1	33	566194	34006	86889	42394	59995	72203	24490	31367	14742	1239177	66981	20283	92608	9497406	803688	16298301	44478	3402759	2010025	100104	13032126	3310448	5519	14847	145866	26209	4488	61778	2027468	501980	25502	1570	84396	4273664	38650	1509550	176278	7231	5193	287805	81964
152	Cochlearia danica	1	BNr 112808	control_warm	1	26	316583	33530	49153	63062	110763	98487	33608	24100	13781	1102778	50247	19026	116904	14488515	820365	11604036	34774	3248595	3502557	116303	15270583	3531052	4708	13631	290707	42640	6308	46562	2376041	288307	25091	2410	142550	2184931	69325	1029198	216466	2551	7539	525185	18500
152	Cochlearia danica	1	BNr 112808	treatment_warm	1	32	537483	38624	39607	33356	66830	56543	19848	33005	7498	902546	53611	21180	77037	9968973	528852	10239965	27089	3317501	1767583	77556	16041303	4027908	3667	9385	136640	21537	3223	54819	1719365	339671	19990	1170	67296	2403093	43849	942046	189350	3924	4926	368400	55626
152	Cochlearia danica	1	BNr 112811	control_cold	1	36	813321	42703	100286	57759	82477	135732	24732	37934	12801	2270973	32063	12565	151105	5734812	1036140	26134419	50103	3714672	1661933	148172	10499030	6233752	6518	21934	146308	7450	3922	105377	886334	801774	42492	1692	93370	4603709	48352	1557489	227496	8969	10186	218900	112406
152	Cochlearia danica	1	BNr 112811	treatment_cold	1	38	947369	105018	190036	64681	109168	289987	136740	93111	31306	4932232	124678	17322	55348	65092211	2914678	123390691	145009	39285598	13221331	391213	81217418	26285165	12397	21621	253683	43979	7183	119417	8439650	1452613	58729	2259	257760	9386236	123465	3652919	391148	9332	14279	1055405	176276
153	Cochlearia alpina	1	BNr 112726	control_cold	4	33	690136	265046	310214	20289	112078	109063	76433	14625	746	194839	65828	26508	20041	7409748	421477	11598632	22135	1896000	587797	309416	6116869	1922433	1875	25704	779489	6285	3077	24025	2772568	69216	11625	874	57814	1440978	81808	344658	467827	5475	2255	105958	10250
153	Cochlearia alpina	1	BNr 112726	treatment_cold	4	32	1.91297e+06	2342208	1936212	34383	169252	1833798	5272230	15866	7775	133803	15748	12408	47664	114828326	19405811	216453417	1505233	68732650	40098196	7663325	105462799	66942674	12608	18371	20127	138256	20130	95332	5861427	943641	36681	6241	154708	16074853	71880	3591610	471502	22972	13487	840584	126382
153	Cochlearia alpina	1	BNr 113034	control_warm	4	39	1521539	231094	134560	22299	143944	55167	73288	11054	629	73368	62934	8042	20153	3705226	358674	9543045	16740	1527106	486834	295453	5350742	832668	1801	34157	647114	4846	1479	35127	910919	69402	16611	691	40202	1259161	88270	130533	279592	5304	1543	37525	4060
153	Cochlearia alpina	1	BNr 113034	treatment_warm	4	39	518253	959925	742719	9749	198399	96983	140216	10262	6605	27564	4003	9595	44265	17743845	4051770	28687789	178482	7896656	4917538	1091214	24313482	6696215	15484	15496	7928	121208	17520	53155	3451858	672127	27538	2032	49079	3175824	38643	2175235	480719	12112	7556	569456	98958
153	Cochlearia alpina	1	BNr 113035	control_cold	4	34	633640	229434	278681	27285	104679	64119	106474	10364	438	53955	47172	6155	19277	4147108	357546	7466735	7477	720978	375536	110001	6112055	2403291	1367	17059	556690	4130	1142	13113	1569745	64782	8058	1459	18439	1136090	45608	158475	122014	2934	1173	63439	8759
153	Cochlearia alpina	1	BNr 113035	treatment_cold	4	39	2.01927e+06	579263	795902	17022	119727	1673777	3472751	13162	5251	155177	110315	13082	22769	50958288	11368577	157906330	853452	73178313	23541754	4276175	105916501	57714754	8786	44778	266191	97372	14717	69174	2708583	399834	35628	4610	103973	8846544	68632	1551914	568167	10138	11768	507113	80317
153	Cochlearia alpina	1	BNr 113036	control_warm	4	26	702873	292602	148154	20806	140018	98444	115035	12686	1126	121671	31165	19898	29569	5123832	237671	11788298	8652	1060082	246788	434147	6622744	1948699	1719	22195	644180	4984	2855	26678	2320296	86899	17867	1418	27415	663042	101884	210993	175774	4270	2285	103951	10794
153	Cochlearia alpina	1	BNr 113036	treatment_warm	4	34	467655	504912	464140	10312	85942	66393	97781	4667	5669	22345	2579	8103	17563	14476959	1723351	18601089	88829	4483389	2569884	681135	17217998	2836835	7531	9728	8258	70499	15643	53913	2248405	322032	19433	2001	37826	3202405	31200	2117720	241780	9253	6137	374716	90074
156	Cochlearia scotica	1	BNr 112800	control_warm	1	36	362629	480549	294131	37839	276664	218735	405263	20667	13645	1351075	66477	47487	99585	862351	2849468	730208	285734	199901	461777	276621	2796052	715795	13054	23508	22633	82011	3779	30892	7361765	206162	663	10497	30758	9999592	42271	2675904	758009	3174	3910	645876	29018
156	Cochlearia scotica	1	BNr 112800	treatment_warm	1	36	631409	609662	250100	95321	515146	251981	641522	55982	11434	1638715	182903	37329	96998	1071096	3780717	1988996	217682	447351	446733	513595	2192188	738892	17055	42032	48133	67468	3176	70916	7501884	445962	581	9095	51976	8624092	68150	3285474	732076	3646	10019	665254	46540
156	Cochlearia officinalis	1	BNr 112801	control_warm	1	33	602715	454706	43559	76424	7405	83258	426940	75295	1699	1590561	232196	38272	180950	1943962	3146573	1035561	67306	264394	215896	267335	1068458	674590	8180	10194	141643	59741	5558	54182	3988562	47045	12763	1425	34412	1621273	22373	739390	90406	5913	5390	1274596	121360
156	Cochlearia scotica	1	BNr 112801	treatment_warm	1	35	483116	489693	51769	65704	11702	232940	390639	81865	1703	2896085	304380	43627	153826	1504660	2401736	1383434	118368	211800	378352	385436	2227473	1126132	7604	19730	156186	77973	6618	50614	3156417	140059	20802	3662	73271	1895329	41227	1371108	134485	16151	4441	2284856	216789
156	Cochlearia scotica	1	BNr 112802	control_cold	1	41	2279394	493711	49167	42718	5964	90136	525369	30780	1199	1102314	204625	18714	88782	2195303	3729835	456016	39411	196727	166923	150877	951826	814650	5211	8349	72473	61282	2457	54710	4010485	36963	14763	1252	25889	1549069	21090	848000	42090	2595	4408	1586922	141007
156	Cochlearia scotica	1	BNr 112802	treatment_cold	1	32	2.37057e+06	1576252	643357	216130	923142	1040292	5722447	287275	46583	21497873	1397137	48426	128392	118721935	22541368	221109121	2123759	131359358	47194394	3516045	163254043	440248255	66749	89016	787354	265048	16991	305524	26714389	3031651	75356	20773	668269	66981645	201306	9470410	1681740	34819	42769	2093188	282928
156	Cochlearia scotica	1	BNr 112804	control_cold	1	28	1501673	532422	33514	46753	9825	32384	545769	37423	1695	1538651	171745	18857	158781	2035658	1299928	1364116	59509	147646	221397	232747	1157190	385162	8594	8530	153877	52655	4930	63646	4714922	32154	15032	1638	26884	1162126	13202	722080	45559	6530	3867	987388	150557
156	Cochlearia scotica	1	BNr 112804	treatment_cold	1	30	2.20094e+06	52925	116750	88198	224661	250291	2.38918e+06	51714	25398	3949955	150574	21330	51721	36081304	1091945	102267934	181485	37836585	12559628	546727	50963485	40294365	9429	25942	221078	32516	11113	78479	4521324	654038	42018	3319	199487	14547487	58037	1940963	437422	11829	12617	522671	111555
159	Cochlearia scotica	1	BNr 112731	control_warm	1	24	487549	13151	49311	59844	44529	125338	35710	21859	34075	2141403	109761	5402	73488	9598414	1894587	30828577	54680	6381143	2541351	56256	18265822	2757422	3656	54132	292908	82826	5028	89581	3089466	194731	48415	2481	127795	3679712	23123	1143402	137666	1028	7734	483922	145266
159	Cochlearia scotica	1	BNr 112731	treatment_warm	1	37	385930	27706	52352	21498	40460	57998	11226	20721	12039	835993	23534	18126	40381	7371666	454520	13728795	22303	2469878	1854300	47191	9857714	2463529	4667	6868	75448	13649	3715	23235	1461958	318337	15486	1065	45464	1768621	30425	787761	104674	4586	2508	186864	40886
159	Cochlearia scotica	1	BNr 112763	control_cold	1	29	541586	14899	40647	68135	83555	134008	38798	19787	21489	1190715	65621	7220	59711	13407248	1218173	14788713	40773	4568282	4828170	41151	19762446	3616601	3116	23891	343305	67121	4184	49175	3610038	104129	34497	2420	140598	2225923	25813	506221	183222	680	6907	470126	20181
159	Cochlearia scotica	1	BNr 112764	control_warm	1	29	1989415	7220	28441	27757	26734	81382	16124	10095	11171	802793	37153	3976	15571	4222823	348225	10569229	25175	3677232	1491600	18890	12932688	2504791	2761	13207	79257	16358	1792	22811	2267712	113116	14502	664	34402	1729140	9807	314202	98279	610	2585	141399	36533
159	Cochlearia scotica	1	BNr 112764	treatment_warm	1	41	588608	20968	35629	17223	43493	66614	10819	18317	6426	951067	35947	17225	35752	5598072	502826	7698836	18345	2586333	2016280	59078	7174304	2223154	4849	7321	59815	14896	3122	26013	2285172	374719	10992	1055	53000	1601035	29483	923876	146400	3225	3629	294531	46206
159	Cochlearia scotica	1	BNr 112768	control_cold	1	26	12898556	7099	16537	23728	29825	43262	24154	8298	5287	1070939	21118	3230	9969	2233587	291285	12184549	15636	2002716	595897	24461	2150219	2733218	4541	11719	36316	15983	2744	24588	1804670	121765	4508	466	43238	2150826	16079	237146	14625	274	2441	81131	45861
159	Cochlearia scotica	1	BNr 112768	treatment_cold	1	40	2.12346e+06	49122	187407	119657	1280000	245243	133544	114595	12797	9569599	1650250	17700	42333	72983682	13137876	169015735	740465	62693256	17499182	4466475	98243858	236632409	4229	28481	106977	212619	25644	139600	8301782	319913	58842	6084	246972	41273552	191909	2498255	703787	20784	50858	1363475	68286
159	Cochlearia scotica	1	BNr 112769	treatment_cold	1	39	2.00537e+06	34420	91906	48563	62371	510078	203261	44733	11972	3676903	119252	19560	48552	42401046	2441785	60181042	120666	37105612	15191530	480067	71518595	33135297	5794	10933	144466	21560	4957	62242	2609774	420206	27481	2648	158359	13920332	35280	1181293	176594	5565	4315	543507	89028
161	Cochlearia scotica	1	BNr 112656	control_warm	1	27	413634	44290	35615	27252	24538	140347	32802	20117	6931	754036	36462	2950	31078	9787015	428780	16147436	26168	5585471	1997982	2841089	4189269	4606420	460	14823	82434	14781	1388	57787	2774934	82070	20003	2064	74126	3545318	30281	1256395	165694	2911	2700	66339	35288
161	Cochlearia scotica	1	BNr 112656	treatment_warm	1	43	517417	36336	29791	17769	35448	74140	19752	21441	9844	565374	36457	16458	31835	6139483	506185	15685436	20567	3408249	2239131	1848784	11117040	9.75607e+07	3137	8778	103047	12666	3266	41346	1690264	251773	16536	1128	66128	2531858	36539	1109409	113032	3695	2016	160016	34853
161	Cochlearia scotica	1	BNr 112935	control_warm	1	22	606503	529	13166	23243	12068	23365	484	2903	3943	567817	20667	794	5158	378877	55789	7219119	10930	1051424	517285	15805	8214	640158	1953	5939	6395	8706	564	17302	367813	103104	3580	138	34276	960729	10641	56775	6733	195	793	8391	16083
161	Cochlearia scotica	1	BNr 112935	treatment_warm	1	44	531251	19898	24372	25152	45137	62146	17924	20915	10526	815873	33298	14120	37642	7496962	300945	13655692	25231	2396369	1558992	774994	10925990	2203381	2965	7303	86290	11686	2484	23902	1824610	291510	14365	1050	52949	1779041	27104	721517	84868	3522	2455	152247	36164
161	Cochlearia scotica	1	BNr 112937	control_cold	1	25	987609	27313	3951	24575	40193	82042	25874	34351	2668	540441	47109	19780	31640	3675145	908153	10881590	7373	3616347	1429411	1675330	13747291	181411828	4008	11403	137119	19094	4692	44204	3185979	238619	25492	1254	73466	4079704	48322	1335726	126584	3442	3124	298591	39323
161	Cochlearia scotica	1	BNr 112937	treatment_cold	1	42	1.69341e+06	18547	164434	158179	905211	707827	2663362	98064	14670	10881691	627284	52593	47382	60516807	13007390	86673415	740398	51937124	9208781	4048116	61266419	83607820	1112	33204	27550	155211	35849	98633	4134798	52636	86628	4534	86573	22217858	168581	3309211	724046	20759	38525	2361472	382524
161	Cochlearia scotica	1	BNr 112943	control_cold	1	34	24773468	109077	57113	22749	26234	299691	73235	37506	10510	2011469	21513	7776	48562	7443188	340312	42177682	10115	8870302	3332618	3200848	1571605	47485660	584	18973	19254	36872	1530	41398	3782756	15011	20604	1059	49949	2807324	16636	1302740	257921	4857	5325	203977	46814
161	Cochlearia scotica	1	BNr 112943	treatment_cold	1	46	1.71395e+07	876512	604992	630186	1038935	691784	3544332	758241	76869	82717971	3667779	38156	47368	320430071	141626500	516027849	14909177	214310360	210267597	104803871	537902213	10736721733	53687	145620	807262	746031	118283	631289	37306664	2401250	363120	77087	1734932	196469363	1076004	24765845	2366293	86522	102794	10455751	782217
162	Cochlearia micacea	1	BNr 112724	control_cold	4	21	5251155	45490	936791	53461	112484	176815	178232	51252	33026	432410	131004	37001	157540	12491132	2309193	7629990	259042	1965034	781549	665026	9063668	362373685	15708	34316	40775	119412	7323	79683	3594284	215147	23582	2580	86523	5749267	97002	803267	379758	9567	8547	810302	170118
162	Cochlearia micacea	1	BNr 112724	treatment_cold	4	33	4.50145e+06	1774168	1947326	203079	849585	521339	1600753	58410	25332	15673999	2575092	85312	92706	70407086	36734096	151764803	5637473	75640292	21458807	10305294	155947633	1076556186	31512	76856	91098	326819	91705	122352	16616543	1240041	60675	18881	209216	43759595	185278	2592980	1033909	27406	44596	802167	460690
162	Cochlearia micacea	1	BNr 112892	control_warm	4	26	716124	46802	875243	38678	231193	165899	434063	59490	41028	425991	205088	83954	69766	8437515	1759949	9686614	188345	1323388	876652	791439	11903075	501261980	21712	51619	56478	147175	6035	89835	4269839	190841	18436	1478	76807	2898878	94256	1212220	348306	10102	8630	411597	179161
162	Cochlearia micacea	1	BNr 112892	treatment_warm	4	41	380361	58527	787622	53033	218107	169584	334455	40681	28125	315970	197984	68765	122342	9373478	2696293	7511655	195022	2005538	697176	573054	11734708	4.3781e+08	14690	37358	37507	97758	4779	59321	3113201	174215	19412	2609	121399	4183176	71420	1531327	363415	10838	8423	698447	179533
162	Cochlearia micacea	1	BNr 112893	control_warm	4	37	870037	754816	781649	85069	335770	96088	233325	32413	2591	4070050	174243	121732	65922	2359543	5751069	7954713	269379	701569	1581405	600889	3321066	13574396	5345	6643	17382	131487	41598	30604	6976097	864101	31977	3088	26706	5431355	76353	123689	210947	8331	31848	215735	175954
162	Cochlearia micacea	1	BNr 112893	treatment_warm	4	45	569417	980599	573558	102154	260072	105176	266036	24480	2365	2817030	116231	89818	116327	4190994	5849564	8939878	398762	1268474	1404067	423503	5643421	10798293	6091	9254	25125	132155	32672	53127	5052010	699155	24843	2212	35082	4090541	71765	145952	296344	10862	26127	280062	117707
162	Cochlearia micacea	1	BNr 112897	control_cold	4	22	656466	1435678	539620	60087	239784	114357	257313	33164	1379	1947961	122851	46308	100119	5814828	6937185	5932678	245869	1474539	907140	481077	5533358	13349595	5662	9205	21421	85148	35797	56130	4951254	1036945	23362	1892	51494	3746495	65034	208521	375982	9393	26231	162881	121329
162	Cochlearia micacea	1	BNr 112897	treatment_cold	4	29	417584	841622	682450	43437	304629	255880	1101870	13513	1791	4290408	287410	52162	49025	8965976	14394586	21309572	826462	9285161	4110331	1386522	20429675	59577887	128	8124	26862	126104	29768	38769	5854924	454552	20994	2499	37567	7242697	50959	104951	193177	7511	19864	112707	90206
163	Cochlearia micacea	1	BNr 112725	control_cold	4	25	1617992	452671	615841	36421	197542	65594	134195	14403	2519	1754352	71352	24957	78666	2330825	3452430	3204608	210016	20272659	547577	326843	2832487	113322010	14288	5093	17937	68600	12465	13327	4817668	295721	15316	2156	12010	1321775	55879	82548	95718	3929	15678	810232	58961
163	Cochlearia micacea	1	BNr 112725	treatment_cold	4	35	1.50129e+06	1982992	1285326	144512	638255	770111	2333786	59562	22911	16209796	1545331	64668	142017	73389535	42113887	84967730	2166554	55021839	13286234	7507468	82381292	318080143	34869	78822	49806	412359	65971	114713	10781002	1189459	72906	14279	282160	37729950	193996	3702152	737759	34208	40500	1037780	434623
163	Cochlearia micacea	1	BNr 112900	control_cold	4	21	725245	528351	340389	64346	270969	70585	129323	7130	2123	2245608	52261	41990	55878	2282423	4338062	3370985	129500	12833546	940163	467876	5112550	106644874	14995	8796	19073	55767	22715	22295	5320801	268108	16532	1058	14230	1495695	28643	76132	159238	8378	16636	595653	114089
163	Cochlearia micacea	1	BNr 112900	treatment_cold	4	29	872046	751113	1024123	86638	341177	240915	883321	52620	34491	4634372	1459709	31159	48644	41901081	20465320	113113714	1979793	39545098	13881659	6000667	65208815	228510306	25185	44793	32910	304111	35756	150862	5620070	895913	59380	7203	312053	22682084	87552	3496534	475401	18832	30340	1637391	242226
163	Cochlearia micacea	1	BNr 112901	control_warm	4	26	635385	478902	447509	43567	213451	30956	141697	6923	1530	970122	57498	24689	57054	3135332	2118424	4075309	142360	882961	717117	176803	4365062	3588652	6524	5931	7156	80817	27222	22693	3309004	303612	11808	1143	8885	1792467	69079	47983	143427	7697	7191	243972	56226
163	Cochlearia micacea	1	BNr 112901	treatment_warm	4	24	470086	563777	378219	43314	174781	43278	139277	8860	1402	1640658	52615	24779	52118	1651191	3012505	3960792	139636	1.6456e+07	632525	276874	3164077	9.44878e+07	10184	6869	14686	62163	16715	16499	3846991	329357	13139	1226	9107	1733673	33984	72685	127974	4876	10555	655278	70819
163	Cochlearia micacea	1	BNr 112902	control_warm	4	34	620154	585004	206414	45615	233573	47227	144654	7950	1342	1171963	51280	37624	40640	2636587	1421508	4441383	92688	1205461	699396	228986	4154814	2954260	6928	3579	7983	96121	30516	20871	4390865	166664	15731	1914	11270	1438193	62753	73143	78913	4509	12780	270560	66419
163	Cochlearia micacea	1	BNr 112902	treatment_warm	4	31	520609	343300	283689	29955	160663	39109	163279	7206	1230	1050536	55783	31763	35222	2383632	1675316	3967052	102988	763773	433921	139828	2815618	2616691	4163.6	4240	9629	56352	18348	14738	3260859	228158	11500	1172	10961	1285576	42078	47119	88466	5121	7544	262445	62512
169	Cochlearia scotica	1	BNr 112729	control_cold	3	33	14603823	424480	144137	59989	130361	43027	374686	34798	3383	2018660	9885445	31324	21879	15686485	1901227	38480493	48912	5659381	1661069	68518	39181545	5685110	5247	22408	2433	118081	4832	41394	299805	203627	14388	4204	76122	10330904	33604	899041	431807	14731	11008	387962	110380
169	Cochlearia officinalis	1	BNr 112729	treatment_cold	3	47	1.58989e+07	359949	76927	71291	905954	1011868	6432002	36076	11499	12915115	1.52413e+07	46016	65648	44383229	8580530	91598910	622493	46880640	6785804	2629009	78735176	4299521605	22101.8	17421	16452	154182	17960	71402	3108093	981709	47750	3804	107067	16667581	110732	1583504	283042	13976	26144	968801	202106
169	Cochlearia officinalis	1	BNr 112968	control_warm	3	34	1738865	275759	87874	47936	164434	86733	319243	30935	6855	1819467	3841757	36274	28310	10709826	1862407	18590070	67451	4329730	1056584	145228	24369514	3786303	9330	20583	3846	122889	5513	53590	714126	294740	21917	3100	60910	7517167	34305	803562	266064	13806	14021	711479	135845
169	Cochlearia officinalis	1	BNr 112968	treatment_warm	3	32	2.46401e+06	149759	49064	38683	334589	98243	338354	21340	4867	2203407	6.19324e+06	26359	30552	7124631	1771417	12201063	109789	2680659	924391	268910	11504949	1720258747	9058.72	9367	7256	85210	6210	26370	1133989	402892	23787	1663	33664	4271662	49289	770062	215919	7987	10423	618588	125318
169	Cochlearia officinalis	1	BNr 112969	control_cold	3	23	7605458	190734	74001	33922	308674	148927	360540	31384	7338	1962033	4474432	34353	21906	10893390	1941918	13020610	107323	3769059	802177	169536	16704133	63811555	12081	15068	7050	104861	6157	36900	1248307	539322	25082	2282	51403	5622809	50919	568202	209633	10548	16086	792698	139318
169	Cochlearia officinalis	1	BNr 112969	treatment_cold	3	31	1.60227e+07	430310	182479	251323	285821	414385	2207716	672128	55759	44334000	13294898	41499	63196	215437523	71289523	456591444	6705612	116966928	112535557	59828272	359071347	4328773757	32093	101782	437499	431135	88561	501152	22973261	806855	194693	28195	1599341	94994499	689199	14098336	1460881	46898	67326	8437232	471179
169	Cochlearia officinalis	1	BNr 112971	control_warm	3	41	17818908	398710	104353	67761	87623	50534	282678	30493	6405	1687260	7626930	38303	36597	10529355	1786152	26541845	42409	4973807	1391688	124407	35552496	88398652	7211	28134	2124	144021	4938	77854	408557	161101	19153	4228	72179	10049761	23124	1136434	337693	18084	12223	638584	132459
169	Cochlearia officinalis	1	BNr 112971	treatment_warm	3	38	1.2818e+07	177579	57586	29524	520040	109148	529413	27925	4470	2864524	5.48092e+06	29978	51761	10242314	1567132	14171818	2.75008e+06	3917186	4.6436e+07	2.42759e+07	12882977	1731872480	13090.2	12051	183019	65095	11757	39538	1661902	332158	21483	1583	46411	6042599	49127	879273	214444	7352	13643	813797	226756
193	Cochlearia pyrenaica/ alpina	1	BNr 112733	control_warm	2	23	3520729	372279	34374	31190	89615	5497	46025	5465	1692	720568	12166	8838	56388	4393640	479974	5424247	24998	2548295	731950	65944	3478092	299100	1073	2771	10830	20077	6393	16390	161011	69665	4901	1315	11799	735374	1731	41285	147091	188	1383	148560	7414
193	Cochlearia bavarica	1	BNr 112733	treatment_warm	2	32	2.56854e+06	478456	63993	32195	260264	32544	155277	5713	2148	1121344	39711	48336	80780	5577185	661634	12306676	26516	3167889	1109456	201516	5208151	772947	4534	6727	24443	46675	16635	29775	239206	158016	11752	1220	15963	2613154	5967	62464	294981	3558	2128	191136	53677
193	Cochlearia bavarica	1	BNr 112979	control_cold	2	26	14631059	492655	28975	34424	86561	3163	39767	2635	1090	282007	14438	4214	65218	2330821	362303	3275703	30942	3439703	703777	77966	4233889	323087	1351	3095	9812	7244	6250	11371	71914	33193	5301	1321	9582	428342	1562	14564	152115	193	1465	111934	8532
193	Cochlearia bavarica	1	BNr 112979	treatment_cold	2	24	1.18924e+07	2086732	773002	301046	2915884	1529426	10874257	241814	56045	75174453	3941014	53757	137917	149287167	57841223	380131891	6766676	224803827	174392670	101150752	184561515	5674560947	44466	53759	512364	731848	45930	305110	8924334	2793381	144587	21087	94976	115008601	123100	2857615	2457950	30588	31613	6988033	352145
193	Cochlearia bavarica	1	BNr 112980	control_cold	2	16	15381308	177180	57112	6096	238393	20000	62870	866	486	412334	29433	4685	41718	2130049	77960	1764423	17456	1659872	88340	192914	3111811	153142	2744	6793	1029	4004	3997	13214	124569	94566	2406	536	2899	2453497	1655	17669	147658	808	1955	131833	38272
193	Cochlearia bavarica	1	BNr 112980	treatment_cold	2	21	1.74269e+07	1644454	407918	414635	3185814	187469	627751	263041	41363	25082927	3274159	44035	98348	53615086	24277836	189647360	2441244	69003663	20923548	15791641	102236156	1561883373	29938	51623	324223	692997	66157	260708	7119240	2351967	87165	10259	115633	68113576	162500	1962387	2258698	30784	29016	9024841	548539
199	Cochlearia donica	1	BNr 112868	control_cold	4	33	3606990	37684	18057	130330	6048	230001	527793	106112	1478	3201008	225019	69536	56799	862072	2743319	1899160	196885	177645	459670	551858	1430701	14561241	4109	26591	127235	88376	7997	54231	3503316	95463	30832	3784	88635	3512503	31709	871283	73540	11472	2704	2257524	144622
199	Cochlearia pyrenaica	1	BNr 112868	treatment_cold	4	35	3.84942e+06	209541	177202	179596	32065	1371593	4995142	235695	40750	12285166	1499218	112330	202913	30623950	11111696	49992280	1821857	7138544	14643621	8888776	51717241	39897285	24946	74413	414530	223926	30178	179716	15372794	529826	132319	19634	588041	28353404	303410	5636291	559398	37387	19623	4242918	272989
199	Cochlearia pyrenaica	1	BNr 112869	control_warm	4	32	2574646	97202	39667	93427	15045	373830	542990	117574	2051	2477715	277640	126989	82664	1667214	4266835	1138238	215982	328551	569292	522427	1029302	22843401	15818	42653	182021	84206	7686	61249	2533032	244623	17947	4308	125272	2561070	37730	1481010	76543	7601	5135	1653309	330810
199	Cochlearia pyrenaica	1	BNr 112869	treatment_warm	4	33	1.8959e+06	75268	51269	139467	12414	304422	425322	131980	2542	4154017	309947	88177	142799	1244857	2995731	2067883	163265	226435	449043	436783	1457873	16086093	12563	29101	177591	88811	8198	65187	3847197	168529	31382	4639	110477	2812035	59066	1269360	148490	12149	5636	1820326	223555
199	Cochlearia pyrenaica	1	BNr 112870	control_warm	4	33	1567415	95503	44707	161993	16358	140687	400535	92198	2484	3339675	213216	67359	105321	628548	3366493	2061452	84603	287211	457650	488990	1462474	21823931	9030	28493	234686	63461	3622	84941	5327370	70153	33099	2317	153636	1395849	71079	1033293	199882	12913	3449	2353889	200966
199	Cochlearia pyrenaica	1	BNr 112870	treatment_warm	4	32	2.03216e+06	47900	2223	49509	5328	130371	1131099	86137	898	559841	422398	50217	41708	15248078	855883	12872301	59018	4090544	728136	121282	14916178	6.63912e+07	10858	24227	46138	23020	13667	57454	2076273	103628	17382	3765	85555	3324785	80690	510268	218316	3126	668	833165	77159
199	Cochlearia pyrenaica	1	BNr 112871	control_cold	4	34	2665067	43617	39774	178800	10430	196620	540672	77518	2111	4016802	123635	69887	71209	1062817	2762419	939850	106348	165391	316952	532409	523545	7939184	12879	25739	100941	56539	5435	57770	2987100	198456	28108	1963	128363	2779768	33564	982754	130298	8681	2750	1277233	76751
199	Cochlearia pyrenaica	1	BNr 112871	treatment_cold	4	46	2.72194e+06	196802	81578	49874	18074	681841	739746	153526	32668	1458300	193007	52692	199092	33953569	3290180	36144306	200035	5119798	14804182	4138382	70666304	172729134	17524	55999	283617	118187	14267	243452	13601672	805640	95998	7410	516991	25636839	280510	8400921	680510	22024	34518	2143130	33333
200	Cochlearia pyrenaica	1	BNr 112876	control_cold	4	27	2596151	123907	3950	10837	819	11607	50027	44118	9387	162176	204328	9204	41026	5676683	346404	10091026	33721	2185614	1896174	675096	14259838	9067486	5042	17284	27946	32090	2104	61432	1964548	111482	21548	3236	120724	3880695	82961	1451149	442736	3308	17481	677678	12224
200	Cochlearia pyrenaica	1	BNr 112876	treatment_cold	4	38	2.16121e+06	337668	123678	103517	55657	476408	3481503	219654	29004	2252081	541814	33426	37761	43557642	7131146	88393722	412257	31996347	12580410	5364617	75366115	90117595	17627	48181	530914	221887	34662	171489	15124229	1286729	74623	6729	345925	18125545	212862	7171876	520509	25803	15936	2462316	53961
200	Cochlearia pyrenaica	1	BNr 112877	control_cold	4	27	1041349	214890	4722	12506	1813	15997	58038	47751	9495	298775	263987	10898	31764	3477906	902407	15588837	39960	3278456	1447906	793526	25871451	9883524	10547	62576	44424	42541	3596	166092	1685789	91718	23417	2459	100504	5574298	74607	2260304	370368	5887	31982	746797	10908
200	Cochlearia pyrenaica	1	BNr 112877	treatment_cold	4	33	1.54872e+06	159159	10278	40293	18873	239763	210071	109397	8419	440742	283338	8134	37832	35077738	1763913	47314415	213045	14326862	20197001	5284954	33402122	53493253	9169	26839	278226	117606	10365	85901	4686914	543412	41993	9671	346988	13642425	151377	2432070	580305	9702	14325	1301085	31159
200	Cochlearia pyrenaica	1	BNr 112879	control_warm	4	37	1001166	160737	5591	13968	1301	13429	70466	54198	15890	310853	320241	20344	37034	4855645	588273	5651367	31037	4475818	2240318	1156458	29005257	11485954	14935	40211	45271	41197	4174	145367	2676026	96594	31856	2314	111425	3029889	115937	2170351	390079	2573	14401	730761	17636
200	Cochlearia pyrenaica	1	BNr 112879	treatment_warm	4	37	1.389e+06	104242	2706	12754	864	9189	31529	35136	5342	177895	117136	7164	23174	3918916	374871	6520761	23165	1683989	2011982	726001	10120427	6218284	5445	20739	21876	22234	1456	72577	1481573	63962	26504	2373	90441	2608945	52863	1253792	264812	2470	13166	634950	11715
201	Cochlearia pyrenaica	1	BNr 112757	control_warm	4	42	466542	170861	16220	5119	140312	21363	39183	2343	1283	506262	15887	15058	95088	1830136	145154	5828678	10527	1158291	75808	65983	2193034	1309262	881	1665	7052	20297	8159	12080	179946	32616	9627	349	5770	245644	983	11441	165723	2154	1528	113784	28590
201	Cochlearia pyrenaica	1	BNr 112757	treatment_warm	4	36	425176	156851	66453	26730	179086	24565	68624	2038	1114	895621	26664	44881	97717	3852856	332845	6519943	14365	1467269	349016	165357	5309580	1258212	2857	3981	16598	26068	8740	18422	188040	136138	9519	406	6073	1394396	2882	55351	221941	2706	1662	172453	31032
201	Cochlearia pyrenaica	1	BNr 112760	control_warm	4	36	207854	119009	102346	26442	62117	23248	22511	1767	1223	928514	43362	23136	64770	3414188	509769	5770375	12184	1717261	154225	109260	3487409	561099	2580	1911	8558	50734	2453	16856	69769	80371	7392	787	3039	404454	1739	44108	87063	2041	355	239838	37838
201	Cochlearia pyrenaica	1	BNr 112760	treatment_warm	4	27	242961	243643	90518	32763	255277	38253	71042	2561	1201	1086378	40594	53681	111680	3281301	510823	5533556	24014	1507497	422310	144996	5614690	900725	2230	4141	21819	44072	8244	29911	164880	110185	13139	950	8124	1839588	3593	44323	171124	2266	1063	234248	66112
201	Cochlearia pyrenaica	1	BNr 112761	control_cold	4	28	263913	272415	62402	10651	311255	48309	61406	1436	1207	383335	25415	22318	109067	3136657	365913	4155982	8960	1406288	217438	116491	2282393	919736	1566	4423	15960	28944	6275	22678	178968	77526	13334	878	5094	1929926	2415	49129	215338	3026	909	283420	26659
201	Cochlearia pyrenaica	1	BNr 112761	treatment_cold	4	28	403832	231393	68685	29433	294241	127557	504667	2957	1141	2848354	63243	63862	98648	17624915	1664884	39133167	156273	14668170	6427079	1196159	22858914	9144510	2626	5498	31484	45790	7056	25519	153702	147471	11980	1205	23715	4200978	5406	63391	211581	2553	1425	161232	36972
201	Cochlearia pyrenaica	1	BNr 112762	control_cold	4	37	2567350	305400	91177	34594	429638	41506	90101	2967	1418	1361011	38306	46008	145833	2959792	459480	6953545	22594	2417957	318742	120808	8602477	1517448	2663	4506	23585	65668	7449	22306	237452	102873	21112	1311	12088	2982885	3561	57950	199394	2986	1900	354861	48818
201	Cochlearia pyrenaica	1	BNr 112762	treatment_cold	4	34	2.2055e+06	773345	312404	127341	978287	982058	4692626	124034	20799	7740839	296530	59067	121000	13743226	8006865	31319845	742840	9158995	8360076	8086268	27570105	60274235	13946	24722	211763	285201	26001	108068	5092386	933097	63253	4481	30363	25095469	90861	1493443	559418	9659	12238	3715278	197855
203	Cochlearia alpina	1	BNr 112735	control_cold	4	20	1649169	51004	9936	11659	5222	87661	190959	9681	839	1515575	37564	47268	113057	371380	148456	1427647	5861	1258590	283391	120579	10965724	1090904	5857	18745	12355	2288	11703	10917	560811	357441	9213	448	18043	509441	31234	845151	82810	5699	449	2168913	12516
203	Cochlearia alpina	1	BNr 112735	treatment_cold	4	34	1.88581e+06	1199623	239320	150419	455178	313341	1115182	84443	7694	10255109	401779	83457	177061	28713169	2454592	114610490	238756	28411234	13388867	2037918	73247118	26960606	19650	43530	102050	79988	43671	117204	5540902	878537	89226	3423	80823	14770437	60174	5417842	719649	22714	7315	6687068	131982
203	Cochlearia alpina	1	BNr 112853	control_cold	4	44	2572362	222985	55289	42907	3160	101338	154026	23788	1069	1166722	180948	33223	153330	2132135	251621	6301963	18102	4635384	953729	209179	7734795	1498579	11573	20838	7791	6726	7599	16173	566855	193224	18779	455	24948	748439	40352	3184848	65169	3975	750	1954891	13223
203	Cochlearia alpina	1	BNr 112853	treatment_cold	4	33	2.46469e+06	723390	212013	134049	295515	1492631	2002892	35637	3766	9031181	480382	157209	124845	32913681	3401416	89023574	191787	31874388	14064514	5015769	59179147	27366764	12811	30223	36606	35385	38384	66654	3760390	459915	44555	3555	109513	18170506	52511	2862002	357013	8784	4886	5499553	100918
203	Cochlearia alpina	1	BNr 112854	control_warm	4	25	3069337	196330	55228	75654	4237	125122	258669	17653	504	2525546	135081	96888	60590	2336754	275547	4010415	17578	1473909	942413	217392	10716666	1640347	7411	16756	17702	4763	14285	22934	2214872	378030	25756	536	21699	927363	52875	3716898	60319	6198	595	3571203	39273
203	Cochlearia alpina	1	BNr 112854	treatment_warm	4	33	2.37886e+06	673060	128521	111448	14316	266832	452062	46418	1603	2305336	140032	121742	179451	8822357	635015	12635477	18612	1700718	2036180	1047355	10321142	3444556	12612	25014	14522	7618	17212	73130	3455658	573233	23232	821	38575	3657562	44007	2860581	176975	10386	3252	7161310	24878
203	Cochlearia alpina	1	BNr 112987	control_warm	4	39	2682773	154937	62384	34924	5018	75115	248862	22827	928	1198905	139867	57928	106064	2329327	221038	4928482	15467	3355221	894263	394949	15928610	1113139	9058	16726	8716	5153	7389	12209	810109	185347	13558	735	25080	908565	32118	4380771	59744	4566	650	3099079	19343
203	Cochlearia alpina	1	BNr 112987	treatment_warm	4	37	1.88799e+06	494441	90255	80289	9629	329448	270035	32729	2564	2445742	147726	126218	122453	5121552	510358	11505750	28888	2513454	1375537	604246	10652212	2838513	16761	21590	18437	7832	21416	44851	2538325	455336	31894	904	36925	5131693	59600	4204884	143874	6614	1867	4327645	46210
204	Cochlearia officinalis	1	BNr 112771	control_warm	1	32	838297	309528	228955	33821	143481	111851	80544	12064	1334	133848	55655	29182	36172	9222528	208100	7251996	13887	734582	308079	462391	7218321	1718363	1403	46208	919636	4431	1615	13933	2060219	104789	11908	1060	34930	913016	50477	126454	178369	5131	3000	97023	9866
204	Cochlearia officinalis	1	BNr 112771	treatment_warm	1	38	492957	219204	234691	23986	113941	77923	88268	9136	656	124819	49275	15977	18460	4550995	325455	8031212	13149	1144450	378088	276196	6580432	1823167	1323	24378	510026	4270	1770	25879	1657839	79734	11851	1026	34495	912186	76194	292262	289993	5069	1686	70758	6742
204	Cochlearia officinalis	1	BNr 112772	control_cold	1	38	273285	219327	234814	24109	114064	78046	88391	9259	779	124942	49398	16100	18583	4551118	325578	8031335	13272	1144573	378211	276319	6580555	1823290	1446	24501	510149	4393	1893	26002	1657962	79857	11974	1149	34618	912309	76317	292385	290116	5192	1809	70881	6865
204	Cochlearia officinalis	1	BNr 112772	treatment_cold	1	35	1.39282e+06	522915	282407	99405	90456	1162378	3218799	76418	1993	3829032	652529	16596	34052	33829363	4622864	37156259	309688	16878249	2598872	2330214	27151638	18633865	8872	44109	561031	71484	11335	72623	4112287	169009	41656	4210	143447	4630393	76361	1071002	445232	22959	4785	2068397	157485
204	Cochlearia officinalis	1	BNr 112775	control_cold	1	34	589749	663759	42986	72663	12988	236092	689913	108775	1817	3022637	474840	42649	107912	1607002	2962335	1050372	216731	251836	738651	642051	2105164	2037626	12888	18438	157284	86779	18166	84134	5405691	222965	30896	4552	111663	2126120	32523	2567280	309423	16182	5477	4235521	159929
204	Cochlearia officinalis	1	BNr 112775	treatment_cold	1	38	1.4864e+06	959505	421244	149429	483915	1014451	3037353	164278	15341	10797045	1001034	105301	158547	9340686	11299717	11172909	1151581	3982556	4233221	3254461	12538560	15495562	16660	41107	211612	122768	13126	117736	9748528	627862	35461	18826	345843	17253206	95447	2558267	793094	22294	16721	2588376	155835
204	Cochlearia officinalis	1	BNr 112777	control_warm	1	33	548723	268529	349494	19752	173980	82369	64895	8696	753	135209	69018	20389	18264	6875125	421154	10208316	10231	1149925	385764	357080	5186232	1302961	2072	31921	705001	6790	2136	25009	1081787	125164	14296	1504	21945	1304550	111302	201789	237312	4397	1453	59447	5571
204	Cochlearia officinalis	1	BNr 112777	treatment_warm	1	35	440575	514862	43676	103183	9983	294214	580005	115837	2630	4280758	327509	55305	120739	1881184	3810245	1569600	161193	305050	534281	645873	2191258	1633148	12245	15919	195665	86152	15559	71838	3471024	185091	34710	3410	76590	2045318	37755	1688261	212191	15942	3903	3047111	190334
206	Cochlearia officinalis	1	BNr 112727	control_warm	1	44	1288846	9867	46410	76716	631108	229260	461881	50464	11504	2655042	120338	56820	65917	8703382	3180631	19729891	154097	4319463	1979687	10387933	15394844	573029083	490	18054	8848	110489	16224	40028	2891483	19540	27532	1860	74748	9127211	41125	949147	284271	10182	15834	1288409	283844
206	Cochlearia anglica	1	BNr 112727	treatment_warm	1	37	2.0094e+06	6733	53223	44061	457864	131223	379829	36560	7383	2678771	124672	41351	42632	8985344	2072125	15587018	93566	3030380	1157866	1.01452e+07	12639774	693470950	414	13340	7399	96817	12166	42051	1738323	11401	30711	1545	50016	5793796	51033	918814	285366	6585	12322	847307	191371
206	Cochlearia anglica	1	BNr 112882	control_cold	1	46	18273100	48299	8097	116665	4632	177695	152183	208207	39448	1425020	3429993	32740	78081	4919173	2494292	14371636	180202	4326670	500826	1725042	14410614	84907308	2198	16999	245219	22774	20836	42286	1811158	227282	21968	10446	208854	6437427	108834	1558992	123166	9195	4575	899903	49336
206	Cochlearia anglica	1	BNr 112882	treatment_cold	1	41	1.48174e+07	442770	262250	297386	50330	921943	1379180	710210	57803	58450338	6138883	28121	59983	108876711	62251387	284594222	5350449	91376321	120622930	44074706	274338048	1382632878	43916	100126	564032	247460	67090	325232	19708341	1365361	262556	36698	1677037	92307811	487841	15415936	1165981	46688	53858	4573758	410163
206	Cochlearia anglica	1	BNr 112884	control_warm	1	32	1929427	52101	8473	75678	5651	179769	125446	163974	24244	1189068	2505554	18763	44801	2918753	2548861	11692454	216351	3762098	487996	1778557	11382589	55375954	1460	13779	235964	21267	24700	29488	1086446	211492	21980	6883	153666	7590783	109010	1943491	84237	10756	2783	717399	33644
206	Cochlearia anglica	1	BNr 112884	treatment_warm	1	23	2.09037e+06	51978	8350	75555	5528	179646	125323	163851	24121.2	1188945	2.50543e+06	18640	44678	2918630	2548738	11692331	216228	3761975	487873	1778434	11382466	55375831	1337	13656	235841	21144	24577	29365	1086323	211369	21857	6760	153543	7590660	108887	1943368	84114	10633	2660	717276	33521
206	Cochlearia anglica	1	BNr 112889	control_cold	1	52	1542054	8870	46141	76216	572604	126039	462074	60385	11196	3493485	208450	55014	70687	11454146	2666662	23410390	83002	4118114	1824627	14288828	22467113	924472749	786	21960	8483	165819	10585	41168	2544745	17073	30089	1676	86006	6393345	57516	1420198	263646	6599	13299	1231019	318457
206	Cochlearia anglica	1	BNr 112889	treatment_cold	1	46	1.71443e+06	76295	11561	135773	9698	321122	586112	191048	1289	2283750	83308	8954	20029	8433844	984247	15722164	92633	5512329	1889550	628749	11276735	227710964	1406	20387	10838	31770	29601	44854	942949	372903	35191	7628	143312	20453876	158483	2494695	110124	10132	3278	1191402	43480
207	Cochlearia scotica	1	BNr 112825	control_cold	1	32	1063406	15506	28262	15401	65810	79479	22553	11454	8524	991878	52383	5357	33329	5897386	303577	2875467	24006	2116176	976461	24054	7775274	2869718	2466	5762	53663	14021	2745	25165	930861	434310	4551	168	49171	1749942	41993	470541	120437	1906	2279	189095	10923
207	Cochlearia anglica	1	BNr 112825	treatment_cold	1	25	1.75295e+06	120387	175872	58914	160551	459792	242518	102876	27218	4303511	240699	22685	81478	77893566	2862533	118501697	252450	56488913	27963097	601784	74054302	53030931	10139	22524	256570	42203	7693	127724	6771771	876121	43838	4190	261518	19400069	74977	3194097	567501	9745	13312	1020408	116053
207	Cochlearia anglica	1	BNr 112826	control_cold	1	22	1949605	15895	19982	21967	39511	31817	20929	10091	3424	991848	16190	8398	19419	2413713	196193	9560671	13347	1424191	432318	69041	1661515	2668565	6889	6714	30769	10188	4114	23285	1187812	337175	3308	464	43837	2111217	43103	482074	17258	782	2657	90621	42028
207	Cochlearia anglica	1	BNr 112826	treatment_cold	1	26	1.95527e+06	75327	127633	90442	177380	188408	127695	92866	45575	6113608	399181	13349	52129	86711853	2919149	188284622	326910	53880335	22904060	795486	87054032	156124511	18981	41148	385709	65454	11464	96612	8590783	1446728	60353	3346	323685	23441066	126139	4104886	582190	10027	14277	899758	197146
207	Cochlearia anglica	1	BNr 112828	control_warm	1	32	651999	15986	42618	11812	52573	60228	29898	22420	2220	232444	43651	6533	108346	7029939	63720	4198770	16441	6681793	3201024	73459	6825627	43062100	6378	7963	67930	16461	3361	21784	499777	231841	23018	1908	67350	3055494	6429	1184749	288637	2445	930	87682	6451
207	Cochlearia anglica	1	BNr 112828	treatment_warm	1	28	599266	24962	44027	20151	70325	50804	16750	19442	10587	612510	30754	13851	52853	9190802	242413	12007156	17409	3018714	1722542	68128	8100259	6.49772e+07	3023	7754	61697	12801	2295	28261	1521018	145260	14505	739	57583	2629731	21834	782713	94450	3818	2593	175676	33233
207	Cochlearia anglica	1	BNr 112829	control_warm	1	18	758709	16170	34385	25696	35412	59823	13977	12282	7185	743507	28461	10384	30398	4563378	234537	8293205	21478	2614959	1082093	53267	9993190	2445542	4164	7559	67128	10426	2664	21602	1492570	313208	10567	662	34878	1697297	26208	638755	116101	2246	2814	157949	33482
207	Cochlearia anglica	1	BNr 112829	treatment_warm	1	27	556809	16047	34262	25573	35289	59700	13854	12159	7062	743384	28338	10261	30275	4563255	234414	8293082	21355	2614836	1081970	53144	9993067	2445419	4041	7436	67005	10303	2541	21479	1492447	313085	10444	539	34755	1697174	26085	638632	115978	2123	2691	157826	33359
210	Cochlearia islandica	1	BNr 125632	control_cold	4	40	1725412	520798	395026	301655	63126	193987	151120	30221	1572	2525838	81326	64507	60479	2981690	3511802	2761676	281362	21629592	2114458	433992	4151630	326446329	7669	19449	5431	48638	911	31903	13928657	694579	23389	3594	52896	9808862	65222	1291993	355189	2871	1501	539870	56579
210	Cochlearia islandica	1	BNr 125632	treatment_cold	4	35	1.72304e+06	1384204	519995	178292	474853	872284	1414914	27113	25721	6493054	1570025	49780	79392	57564547	35224630	67970899	3876240	39495505	18305688	7752534	90924398	822587382	30290	44455	41040	224630	20098	77892	13511879	1081717	43333	20194	342745	41662288	103530	1782092	765363	15668	17554	1628362	270303
210	Cochlearia islandica	1	BNr 125635	control_warm	4	25	581535	359170	308223	150058	34176	309030	238308	37497	801	4074304	57741	64386	55777	1915582	5958690	2927878	165502	15204138	1971937	305541	3305910	375619350	9527	15697	4549	34264	1651	33344	14648500	586020	20054	7450	80401	13653559	41451	919818	361310	3693	1734	636633	29033
210	Cochlearia islandica	1	BNr 125635	treatment_warm	4	36	537463	405099	290203	211359	41257	234584	191976	35330	920	2.71985e+06	65469	48196	74431	2591202	3617397	2032230	230599	16176862	1255351	328601	2905248	3.38866e+08	9733	11938	3151	48758	1006	31196	9481955	482022	17849	4852	55067	8791362	47697	1008486	431283	2183	1314	388062	40834
210	Cochlearia islandica	1	BNr 125641	control_warm	4	41	447165	616888	101828	236149	100844	136114	155240	23813	1047	103945	104302	31700	36673	1981047	2413976	1981469	127334	432854	736755	453586	2552413	12077847	4489	9313	2719	50314	1266	22725	7269250	589217	13768	7087	60928	5758301	35921	1277253	420286	2016	1379	677383	27709
210	Cochlearia islandica	1	BNr 125641	treatment_warm	4	41	403567	657764	154968	195610	99643	159101	128122	15255	988	124259	71816	24850	59181	2216514	2467632	1996791	205585	364135	1179236	506354	2079857	9180325	5536	8632	2017	32814	767	22912	8052408	444229	17255	5281	43753	5627635	49690	1265115	372113	1825	867	567943	31848
210	Cochlearia islandica	1	BNr 125643	control_cold	4	28	1125203	711954	147699	235254	117604	210644	106610	14497	933	112239	101690	38894	83197	1725989	2142624	1896769	235233	591627	1961340	421302	2156941	13944610	4237	11659	2778	46489	765	38674	6971093	681299	23556	4978	64046	5773528	45077	1270104	263715	1765	1257	542205	26665
210	Cochlearia islandica	1	BNr 125643	treatment_cold	4	32	1.75308e+06	736300	679439	117390	456649	672751	1446783	72071	30198	7475739	807173	116082	190462	42774811	18648770	87265607	2354775	27296754	8948132	4571129	47427151	214581670	13158	61393	53849	253136	21658	91069	9330757	658623	28313	5713	181227	23051561	105950	1153188	443237	13097	14938	689427	199359
212	Cochlearia pyrenaica	1	BNr 112710	control_warm	1	34	1884728	333514	107038	25531	14190	135305	206251	42615	7713	209055	83362	76224	146403	1352100	1937608	40936265	21369	19750278	1375728	601521	2526374	14164405	10738	17739	126456	56864	3276	93281	6244598	393238	49122	1535	155837	4109135	165341	4480658	193662	12207	4717	837254	6485
212	Cochlearia pyrenaica	1	BNr 112710	treatment_warm	1	27	1.5802e+06	436352	67978	25026	8369	192936	158901	53673	15640	402166	58217	38913	89595	1659159	477212	2576056	23191	741312	1269953	531673	2208504	12125245	7089	14113	106005	30138	6621	32303	4966518	196305	19536	1615	80103	4654813	50796	1951619	153552	7422	4556	1914467	16693
212	Cochlearia pyrenaica	1	BNr 112714	control_cold	1	14	2723454	616326	98234	18325	9619	209310	115787	67189	23983	463630	34749	51516	57355	1022907	402739	3551739	29685	1132989	1195184	743338	2110899	14622972	7581	12272	140801	41492	9869	48213	5958260	164873	11907	2169	118908	5049041	71859	2434312	209672	8163	5355	1317197	18774
212	Cochlearia pyrenaica	1	BNr 112714	treatment_cold	1	29	2.29576e+06	813948	268875	149219	239736	790554	1679163	63470	22564	10165790	1406423	62545	122444	28378243	5868869	86714559	285215	34383743	22615808	5779539	63517207	216149913	15753	49236	170136	69416	35050	100630	10541935	751331	79552	7008	378339	38466411	138646	6431961	426331	17224	8613	6195055	107281
212	Cochlearia pyrenaica	1	BNr 112715	control_cold	1	20	1931083	208332	49212	18152	8408	73996	237889	34182	13947	188818	128924	88365	124563	2065646	1167476	47459725	24977	24442049	841251	742531	2710950	8095143	14878	10390	95476	45288	2990	62663	6562283	585063	21926	914	118067	3404289	144443	2494545	99580	7163	5497	789313	12053
212	Cochlearia pyrenaica	1	BNr 112715	treatment_cold	1	22	1.95046e+06	696701	88109	54046	12576	887253	2713134	57085	21659	3026750	305934	69479	117281	7733391	2838246	21625535	236034	5067085	13809592	4217289	20880992	129376457	12627	27959	135816	67596	16603	89537	11800140	343933	60024	4893	223995	21046081	124816	3907116	216875	12271	7293	2285216	23194
212	Cochlearia pyrenaica	1	BNr 113047	control_warm	1	32	2983711	218564	70190	22344	9268	86558	156851	35593	9710	169390	117031	56626	124478	1789189	1325445	30705934	30430	19949477	1042125	563418	1820763	9015821	10718	12907	100254	35946	3761	68479	5889927	362135	32430	1188	109062	2602217	120177	3598558	120822	7515	5638	707156	7601
212	Cochlearia pyrenaica	1	BNr 113047	treatment_warm	1	26	2.17023e+06	318170	62327	16549	6485	105843	113555	42030	10777	207480	76189	50215	109484	1284912	895441	3.57668e+07	32354	1.40528e+07	1176796	459932	1623960	12209916	8882	11348	99699	30949	5831	51921	7335756	315163	31607	1884	134642	2617353	110420	2950381	120720	8266	5490	810018	10810
221	Cochlearia sessilifolia	1	BNr 113055	control_cold	4	37	478298	265767	24742	178931	319861	399268	303003	57991	16672	2044782	102831	75181	64288	1373395	2622670	1881740	149828	721989	789262	404766	2388874	129733536	12428	36180	183562	131648	11187	17029	2241390	217394	47746	11118	105450	11220724	40797	283791	311559	13643	13016	2564537	36858
221	Cochlearia sessilifolia	1	BNr 113055	treatment_cold	4	49	409818	362929	33943	173344	580170	1669495	2040088	93605	18257	11306574	2082518	56883	104672	13160757	12391306	36346917	1352888	12278140	11231200	6325650	35114481	396281833	9782	35753	376960	94953	20656	60245	6346109	845746	50046	24192	417358	48772507	99229	1276401	236917	21850	19428	1864066	57532
221	Cochlearia sessilifolia	1	BNr 113071	control_warm	4	44	478499	176030	11255	350701	362703	308304	153873	58624	8544	1427915	115537	36994	62955	1182080	2997846	2445070	172498	265838	325015	671598	4141996	79339403	18997	36173	132088	106983	3989	39522	3107380	240943	25618	6870	60559	11939252	136900	694427	127642	26726	26364	5197811	48209
221	Cochlearia sessilifolia	1	BNr 113071	treatment_warm	4	32	742449	281784	15205	122239	347111	358340	237974	46109	11564	1217377	115787	46037	60111	1533795	2557258	1926924	122248	449140	518445	340665	2784210	1.61112e+08	12058	23516	158858	92729	7352	18483	2962960	281883	35737	7844	88683	7454656	50499	272594	204945	10727	9151	2013006	40240
267	Cochlearia bavarica	1	BNr 112734	control_cold	2	24	1346215	296760	12489	629	69122	3879	59320	7980	465	242094	6987	7292	20021	2614370	275475	258099	27256	1892143	292765	70567	768886	266343	855	372	1329	6777	4899	9949	2588	37583	811	1028	10596	1017725	1228	10978	34075	160	761	47189	6572
267	Cochlearia bavarica	1	BNr 112734	treatment_cold	2	24	1.88068e+06	556773	131898	64920	569998	311559	1408544	109798	2531	5367532	100806	57154	85482	30598224	2381507	75800573	162280	32850869	5685211	742326	43454753	6.39245e+08	5240	11313	36532	74263	17019	50969	297466	313296	13793	2602	41478	11594684	8357	116435	385043	5296	2533	423738	79102
267	Cochlearia bavarica	1	BNr 113056	control_warm	2	19	1200404	363649	88599	55959	559101	25513	112537	3659	1427	1000198	31782	59895	108028	3349095	763584	7416073	33242	2547987	808854	251599	6643885	234584135	7027	11950	48717	69443	6625	30891	147679	246991	8629	806	10756	2607662	4954	106549	199907	4513	2199	182110	81416
267	Cochlearia bavarica	1	BNr 113056	treatment_warm	2	26	370894	280532	66909	41204	376527	41163	117201	3679	1463	1189443	28163	51146	121660	4154759	597000	7940040	23701	1760837	1075273	161048	7604865	2.56694e+08	5488	7877	33323	63270	9900	25802	238588	173555	10180	798	13512	2072523	5528	66558	178958	4348	1674	270628	61203
267	Cochlearia bavarica	1	BNr 113057	control_cold	2	29	1471078	215233	55431	23948	463276	16412	61588	78349	1709	1213755	577250	28891	187708	3169988	10114790	11457615	1557002	942879	1341711	1978332	5277507	516332517	3216	5220	27078	44744	4795	24987	438348	112171	7741	1445	7855	1614158	4531	52450	196391	897	1839	104448	40677
267	Cochlearia bavarica	1	BNr 113058	control_warm	2	33	1558153	246790	40498	36438	318422	16970	43001	60044	1427	1060061	557882	25578	126474	2174448	8015548	11744741	989224	912788	836515	2871203	4361834	340165827	4466	6220	23221	57326	7529	26353	370061	76756	11503	1029	7079	1087145	3186	33073	143831	1256	1819	162919	53391
267	Cochlearia bavarica	1	BNr 113058	treatment_warm	2	29	2.28316e+06	232204	39635	33423	203541	20781	54989	80869.8	1120	820170	717833	25967	80398	3029831	7.87874e+06	7638198	755620	1044240	653034	3.78801e+06	3100012	2.5065e+08	3296	6093	14606	45494	7419	17211	238507	110797	10978	592	6392	1372560	4855	43794	176986	1609	1363	115663	41195
267	Cochlearia bavarica	1	BNr 113059	treatment_cold	2	27	2.45051e+06	974486	234300	228275	1272887	382249	872120	195612	34600	15355509	1744225	45744	95857	38954432	19076421	51432059	1830408	28624714	20577459	9149034	45301568	624276437	14370	41176	279486	214102	18799	123061	4097881	1495401	77123	10196	35142	42961655	117478	1870175	1256515	11816	11095	4476074	171455
269	Cochlearia anglica	1	BNr 113060	control_cold	2	29	6713764	22409	3884	32616	3862	74966	3125228	50774	9213	610787	671108	6590	11855	885144	2080571	29769402	451456	308758	9101791	1020795	992986	23953384	13200	9159	61817	12203	6946	17390	182810	109967	8182	2319	47542	4778946	56564	679578	12081	6468	1164	312079	12208
269	Cochlearia donica	1	BNr 113060	treatment_cold	2	35	1.39088e+07	348303	194473	265242	42639	6042091	32265992	479023	75197	51547257	4164929	102357	300440	109140642	88221459	302761284	9846309	116450963	98042320	44358308	213617752	562903700	56223	109195	699772	246337	41581	487995	24389794	796124	252386	39609	1372672	83695016	438553	12225503	1505176	67512	59660	6214957	406816
269	Cochlearia donica	1	BNr 113063	control_warm	2	30	1632103	6353	5177	16861	5320	70127	2619178	18338	8843	312913	1415852	4603	20231	900613	2252606	12122427	327271	61606	3244526	1330898	1492916	28925225	6444	4531	17037	4048	2617	3440	86706	128885	10026	1000	65119	5613294	61601	1005513	4221	7608	306	184979	4389
269	Cochlearia donica	1	BNr 113063	treatment_warm	2	34	2.53343e+06	17856	4315	20906	1862	73915	2.21267e+06	65937	468	475494	454928	4724	21076	933685	153593	1925281	8771	235202	219537	108675	1759288	17822209	324	5272	2266	10475	5907	17155	241630	105231	7034	2492	41342	5079314	26438	968064	26865	5106	747	252803	10595
269	Cochlearia donica	1	BNr 113065	control_warm	2	29	1261198	11559	4457	32962	4290	65093	2313804	22682	10746	299676	1341880	6391	18600	759159	2444945	33663487	301807	111269	8483364	2556063	1847279	23600546	13712	4196	30258	7329	7222	11227	156061	147579	9531	1005	64323	7898712	58909	1037273	15871	6398	452	339839	7997
269	Cochlearia donica	1	BNr 113065	treatment_warm	2	39	1.70207e+06	18143	4746	41000	3805	111768	5.39909e+06	75287	16019.4	564120	1.09752e+06	5550	16111	964406	6.32756e+06	2.79311e+07	402929	299779	7.83312e+06	3.23742e+06	1848042	43464189	12812	7495	103066	16295	9502	17197	399811	126278	7580	1764	77930	7037999	49024	943817	45058	5770	909	349358	13298
269	Cochlearia donica	1	BNr 113067	control_cold	2	44	2628805	10984	2404	21380	3162	17760	1160201	27849	5282	313841	1617680	7300	5089	225176	1522537	17701679	207831	38875	6768489	1060494	2248039	27011360	9445	5104	23136	6311	8508	13047	140660	155314	3302	389	42958	3459154	42591	902618	7362	2558	525	221843	8522
269	Cochlearia donica	1	BNr 113067	treatment_cold	2	36	2.82689e+06	203677	102703	197380	26793	492014	1.33227e+07	186522	38981	17255897	2690604	11203	27779	24584205	15420356	66618836	975174	14183250	18971708	7853058	42862215	107115248	30705	66981	249897	134486	39054	174257	15195112	595921	140009	17799	615761	47710781	246013	7976694	667238	22899	29355	4497472	155081
273	Cochlearia excelsa	2	BNr 113275	control_cold	3	23	2201760	171924	20031	42358	15750	129728	533360	78828	8485	841224	198147	19850	50050	13097531	1866989	15711329	92228	2364403	1860133	680595	12666218	9235787	11108	9215	258640	237369	19066	42425	7087315	779989	30962	2699	77595	5643253	56306	1815443	629720	12172	15331	1290194	29410
273	Cochlearia excelsa	2	BNr 113275	treatment_cold	3	19	16044551	2158801	816817	244868	731781	6929881	16715135	126206	65384	39534603	3590598	88306	179385	299080764	25903840	612859157	2737975	728258841	141409046	41509633	183080337	5951338376	35517	84318	540343	315308	99506	339387	25750312	3269689	179782	15318	729551	183087210	367308	6903472	1184136	29881	30608	6823997	223009
273	Cochlearia excelsa	2	BNr 113276	control_warm	3	24	2117147	178574	3618	24230	1356	12051	54515	37615	8110	266795	119286	8918	36989	5157146	427609	12778168	34398	2828312	3103972	1278886	13762089	11081590	11214	35848	29113	35225	1684	140739	2438180	113393	30158	3177	125827	2681591	55340	2325797	322559	2777	22696	919858	19994
273	Cochlearia excelsa	2	BNr 113276	treatment_warm	3	28	3581530	366444	55733	53348	220060	35715	74770	128047	1709	1314396	1165924	49480	101762	3841836	12675235	7663581	1162930	1840820	1323129	5427582	3752730	424420458	5853	6327	25224	53363	12059	30209	400513	206716	11357	769	10012	1429460	6503	73494	293557	3018	1594	177302	45365
273	Cochlearia excelsa	2	BNr 113278	control_cold	3	22	492973	14412	12551	32156	219349	142026	184105	32106	6918	2024439	178094	27119	57732	2405688	1743438	5346214	99166	1053317	1751662	475811	3005403	10721580	441	6968	300387	39067	6429	41168	3851066	786838	22297	511	71339	5142979	81292	1311782	126711	15918	3686	543908	31911
273	Cochlearia excelsa	2	BNr 113278	treatment_cold	3	24	1018001	1153317	386076	301247	145767	69605	82679	188594	4368	1641209	195161	4916	12964	16670915	7711137	32797246	761715	13571679	24478890	4136955	25322297	173703641	16121	30399	91282	92276	2701	119365	11636367	1108082	40941	8594	354785	14856065	160787	1997220	552955	12210	13166	615244	88518
Iabu	Ionopsidium abulense	2	BNr 113235	control_warm	5	24	1313887	347695	320691	51183	334710	68911	258357	9197	1625	1451670	82037	33704	35732	3572745	1841097	6587565	152500	862214	706378	257369	3801435	3782088	6230	5335	13277	83436	24350	15621	4541519	380478	19905	1299	12939	2135869	53987	65571	145204	8153	9060	362808	86152
Iabu	Ionopsidium abulense	2	BNr 113235	treatment_warm	5	23	1128205	928196	747142	75920	269895	86769	226652	12786	2196	1831029	65769	38531	86584	2259258	3275581	5838137	173043	20271575	818342	455300	3384655	63366370	18416	8814	18685	113702	18179	24733	6192050	504363	18548	2203	13873	3401905	59996	126838	174695	6701	18697	1052538	123954
Iabu	Ionopsidium abulense	2	BNr 113237	control_cold	5	27	8120584	211477	89689	34352	620046	181214	979941	33100	5510	3886029	7730331	61084	72677	10786975	2649010	14827296	3284365	4886150	54102991	28122435	21543276	60486525	17275	20724	278645	101961	13734	50513	2610405	379574	32959	2071	70452	9823511	50593	1265616	259890	12602	15855	1057955	392631
Iabu	Ionopsidium abulense	2	BNr 113237	treatment_cold	5	26	6119993	559282	268637	326374	379806	858155	2773414	903287	63943	52742547	20044110	57573	63830	374416538	120361541	910908621	8135706	205522605	155368509	89523048	602960746	521166990	50992	162856	671893	791510	146773	699068	33507668	1389193	198253	38618	2256641	153772716	926814	25084408	2403947	66829	113917	15584059	579840
Iabu	Ionopsidium abulense	2	BNr 113238	control_cold	5	23	514474	10727	14774	25685	241178	89553	211655	33931	6216	2238896	137055	52235	51520	2490796	1322429	3512540	101309	898584	1882261	366670	3141246	7110112	626	8105	226435	49853	8358	31448	2353920	721653	28402	706	145449	4478982	61140	907444	139685	10460	3928	686111	20612
Iabu	Ionopsidium abulense	2	BNr 113238	treatment_cold	5	30	1287049	26121	28789	34548	369869	529127	2078150	64332	9178	6492191	1238290	37814	102969	21908620	6988307	27545038	406320	4707998	7735061	2047893	13428063	236416930	792	8769	440089	91786	24266	99065	4745406	756081	49541	2266	312431	22230130	109244	1984628	150384	14112	5742	1477403	77215
Iabu	Ionopsidium abulense	2	BNr 113240	control_warm	5	26	1140035	468831	412575	35241	199347	47954	164448	8330	2563	1228030	99668	55735	51702	2984187	2348198	6344322	117598	905440	618179	231769	4034748	3565281	4545	7412	17573	92686	21211	24084	4399942	462596	16281	1578	20002	2403374	75568	86365	141280	7331	9389	536779	89953
Iabu	Ionopsidium abulense	2	BNr 113240	treatment_warm	5	25	868705	516754	632751	73430	198081	91103	170670	10269	1482	2319852	96509	45984	86334	2980302	4597033	5660346	154888	23440881	1291227	353933	4857929	177986972	19246	10127	20249	100737	26483	17916	5696814	460208	16801	1714	16577	2669816	59269	99434	227823	9045	13822	1297098	90022
Iabu	Ionopsidium abulense	2	BNr 113241	control_cold	5	29	771600	907291	275462	237148	160601	208456	174152	24894	1699	140425	89277	25282	70763	3481209	4077698	2123509	298851	691920	2108671	531302	4158965	12425055	8374	11902	2325	65486	894	23778	10112708	564013	24563	9506	81147	9473801	90165	1878717	393176	3017	1365	904900	34965
Iabu	Ionopsidium abulense	2	BNr 113241	treatment_cold	5	24	2409320	980843	775008	198592	807193	1068714	2389586	77950	36877	10365016	1137404	171937	237532	62840686	28974973	141333974	2983684	48368601	16906516	7740376	65555645	321819178	25595	91502	59584	501104	32468	127314	16626164	904376	39455	10410	310516	25625424	169695	1320724	803917	22628	21887	912280	213316
Iabu	Ionopsidium abulense	2	BNr 113242	control_warm	5	25	932179	1139186	1056778	12492	320204	130091	241848	12841	7681	43838	5905	19597	76770	24801253	5628703	34089440	182882	11675058	7464740	1962770	40002600	9433992	24494	19609	12682	146371	28017	88755	6305766	1178541	49130	2053	84317	3360551	43764	4144648	774470	19095	10133	924332	113875
Iabu	Ionopsidium abulense	2	BNr 113242	treatment_warm	5	25	1168938	504912	464140	10312	85942	66393	97781	4667	5669	22345	2579	8103	17563	14476959	1723351	18601089	88829	4483389	2569884	681135	17217998	2836835	7531	9728	8258	70499	15643	53913	2248405	322032	19433	2001	37826	3202405	31200	2117720	241780	9253	6137	374716	90074
Iabu	Ionopsidium abulense	2	BNr 113243	control_warm	5	24	1475286	36477	30109	49722	443642	1021297	2986873	92266	14649	9037866	2276165	47746	103808	22424553	10960576	32861857	649283	7286436	14058977	2610256	26127536	351140190	1281	16057	694023	184983	30654	121933	5500489	1474515	70467	2319	348478	28101885	173047	4061344	190761	19374	5859	2147222	139377
Iabu	Ionopsidium abulense	2	BNr 113243	treatment_warm	5	24	4210496	247107	293289	100955	3105072	690138	2016313	75000	22641	4734569	255999	86976	104254	18341774	7577116	49723426	188823	9205482	4171430	18145285	36219483	2734069244	889	68163	12293	363955	45263	254660	3450864	39607	105286	6760	199927	25632197	121031	3208553	1552739	28379	54736	3766511	1365130
Iabu	Ionopsidium abulense	2	BNr 113244	control_cold	5	24	972892	378217	322413	30669	153954	152424	151209	10444	1248	134036	64850	32642	22195	8253594	454062	14749285	14078	1650117	534043	459444	8856979	1842091	1535	34892	722186	5791	2799	50023	2386292	141830	14811	1494	36971	1027682	128656	433563	363688	8773	2395	116372	7520
Iabu	Ionopsidium abulense	2	BNr 113244	treatment_cold	5	25	2985016	569785	543557	152351	124507	2103661	4474097	97326	2243	6077912	1028065	21901	62595	63621890	7095727	71327003	484978	21547455	3976531	3410646	28121738	24497848	15491	76679	837396	106458	15538	120843	6548756	263391	45851	5265	293929	7885291	84505	1659737	795164	33314	5010	2080408	293774
Iaca	Ionopsidium acaule	2	BNr 113222	control_cold	5	23	755300	1269191	988358	117083	447343	116149	325251	26587	4119	4047480	149973	178898	215709	4655553	8771517	17024806	493285	2312982	2264798	736524	8988415	11273674	6549	12752	38457	207400	34306	106734	5593899	724616	40879	2462	71334	6233462	76363	265893	466459	16714	30192	576743	192867
Iaca	Ionopsidium acaule	2	BNr 113222	treatment_cold	5	26	701014	1095792	607381	47781	271120	227733	1240162	19650	1576	7013967	340538	45381	53928	8786656	16578994	19391711	1292798	10213677	3945918	1636096	18795301	66131455	116	9749	32234	118538	35722	36443	6440416	413642	19734	2999	34186	6590854	58603	95505	214426	8262	23217	105944	82990
Iaca	Ionopsidium acaule	2	BNr 113223	control_warm	5	27	936433	72208	828011	71666	242447	340731	344079	67336	35106	428113	316568	83282	201277	4011690	4311865	12000198	262244	3097878	1030731	719803	12521695	38766550	27170	48104	60942	165681	7279	115737	4420443	353040	38082	2685	162464	6382134	99519	2796403	596873	19632	10931	1246481	294196
Iaca	Ionopsidium acaule	2	BNr 113223	treatment_warm	5	22	768433	91467	972716	81365	292810	247284	477028	49729	50421	418603	342357	128662	156950	4318095	4638682	10724783	221469	3285354	706162	672080	21823399	31609747	16005	51448	44005	165180	4882	86503	5124173	349515	31967	3928	144349	6162303	94372	2980223	482102	17286	8773	1028512	300216
Iaca	Ionopsidium acaule	2	BNr 113226	control_cold	5	26	850682	10027	28086	36283	158202	109255	142468	45791	9811	1698475	279802	80610	61001	4856049	1164016	10373417	103271	1116329	2592625	730158	3713347	352356937	1166	7445	447877	88451	17138	62640	5076927	976101	30072	696	97048	4787432	179297	734313	180351	19682	4160	1102061	53647
Iaca	Ionopsidium acaule	2	BNr 113226	treatment_cold	5	28	10719892	3333606	1607612	387111	1206766	11990809	29149170	182164	72971	61088759	5612170	97562	220533	537798528	41015975	1094650283	3288019	1034245284	219222936	47154531	271780692	5972859017	62258	105756	873502	408169	107281	419705	48594622	4593706	290491	21986	1335776	329457732	592988	8400889	2128100	30863	35038	10089854	279171
Iaca	Ionopsidium acaule	2	BNr 113227	control_warm	5	25	2774146	291574	6387	40441	2767	22044	79465	58138	16750	328561	174145	14618	42909	7180073	624760	15210647	53671	4351539	4410688	2263738	27552715	14550440	23060	45801	40037	62377	1983	172183	2493660	206917	49879	4017	220050	5241421	61971	3088405	545757	3339	35343	1547432	41295
Iaca	Ionopsidium acaule	2	BNr 113227	treatment_warm	5	25	4192592	605497	66412	68042	445217	38008	101325	209975	2150	1444792	1955542	80932	164097	5491045	19620819	14149444	1263699	2006267	2580861	8046635	6308754	689844506	9704	10601	41909	55692	13795	59091	744284	313605	13641	1044	16165	2013890	9528	130830	384550	5537	2174	183996	92186
Iaca	Ionopsidium acaule	2	BNr 113228	control_cold	5	28	2058563	951791	443298	152312	113027	233484	5082484	154483	2479	8685732	1088640	20211	52152	49461778	12664667	81406657	788349	25731200	3480814	3847838	35418398	28916191	11273	73562	972672	173034	18903	95446	6447402	213862	56810	7011	184087	5839444	125186	1355346	690198	36200	7867	2765791	22072
Iaca	Ionopsidium acaule	2	BNr 113228	treatment_cold	5	27	2325044	949413	1484190	24090	125011	2664781	4074805	21799	6620	243127	159429	22516	24889	99004407	17741298	320373397	1306753	103932569	38015388	7002078	146828795	71534631	11034	59442	295836	169202	15823	113811	2851833	619621	48708	8203	109957	17115698	88989	2086212	830852	12283	18035	912845	114727
Igla1	Ionopsidium glastifolium	2	BNr 113252	control_cold	5	21	949086	1052846	328281	169739	515229	414572	1080181	66086	21037	2256459	255634	60378	165963	1451043	5953630	2362235	302053	838432	462052	656807	2841679	1214738	26704	59443	80784	121978	3479	110189	11210562	861592	909	13773	70349	16884329	118408	3675696	917000	5117	16877	1109410	71115
Igla1	Ionopsidium glastifolium	2	BNr 113252	treatment_cold	5	28	4942542	2722083	844471	384864	923291	1711541	9635335	339124	85706	29601900	1952709	78327	219679	160835799	35496697	262600733	2946900	246195829	48812740	4496466	211622142	723767803	104512	125889	1321459	479192	18611	474720	39921080	5857104	117860	31458	904499	131137300	349762	10595228	2106551	48864	72045	3490703	432327
Igla1	Ionopsidium glastifolium	2	BNr 113253	control_cold	5	25	680977	773590	84332	93483	21283	407059	480181	95115	1891	4540808	456881	93381	216786	2680626	4192951	1489182	144207	287735	689029	415632	3367879	2050341	10870	30383	229949	157619	9657	61391	4288177	236382	30899	3918	91769	2075878	63205	2404738	157970	28034	6145	4387386	222490
Igla1	Ionopsidium glastifolium	2	BNr 113253	treatment_warm	5	31	1055539	821776	367822	122507	1061324	322040	1067800	60499	21863	2072435	314247	47672	180906	1383620	6504450	2618400	292420	643842	791569	715555	2766063	1239220	28184	46268	78236	90557	3696	145775	7521818	611304	809	11429	90422	9437912	94518	6652205	746772	3723	14107	840864	67233
Igla1	Ionopsidium glastifolium	2	BNr 113254	control_cold	5	26	815441	53986	161665	55031	126046	117018	26604	41997	19603	1553374	101134	40809	110284	15974631	1196303	33845083	50872	6004738	4027308	141785	24597514	4419682	7574	23961	204986	38944	7976	95057	2029049	981690	38007	2776	113290	4575054	43576	2405719	200423	7393	7271	512722	100143
Igla1	Ionopsidium glastifolium	2	BNr 113254	treatment_cold	5	31	1265826	85485	158014	60255	196745	486857	116338	80830	40468	6315049	356931	33445	82374	101708258	5876229	109588089	407722	87487588	31760489	790039	156434477	74883691	16257	29420	269326	35863	15326	101379	8309311	1274005	29884	4759	251093	20160592	118524	2768788	661920	13372	10374	712212	162665
Igla1	Ionopsidium glastifolium	2	BNr 113256	control_warm	5	22	2381088	70290	143882	60534	112181	104146	29943	61069	17250	2539458	119828	35504	121313	15655139	1377844	30799026	79576	6605211	3866216	167306	22629713	4905847	6892	28754	245983	36607	9571	89354	2231954	893338	35727	3332	103094	4163299	50112	2189204	222470	8132	8499	481958	92132
Igla1	Ionopsidium glastifolium	2	BNr 113256	treatment_warm	5	28	20327548	434839	115033	64546	1859897	185177	1051537	39266	9227	5886828	12731329	54160	157015	15183730	2435440	37725114	5186162	5253955	88386582	30663491	28465628	2358012503	30173	22925	290054	244147	28229	85622	3630135	695389	47026	2733	101291	17605358	84982	1758508	488276	12895	20860	1875033	522600
Igla2	Ionopsidium glastifolium	2	BNr 113270	control_cold	5	23	637464	9856	17112	31832	155909	76972	87818	44072	5618	1301965	164377	44571	37778	2408945	1100501	5402631	100197	774234	1393665	410904	2888254	233899506	621	7320	286896	48311	9593	34673	3515337	481791	26051	673	59423	2564179	101663	639950	117759	10908	2361	623434	39935
Igla2	Ionopsidium glastifolium	2	BNr 113270	treatment_cold	5	25	2313546	1947748	839060	190925	756020	919435	2644833	33920	51031	7521571	2293455	105637	93346	88986839	44022343	88169086	5034750	58736615	30924817	9621611	173424620	1146075723	50619	48684	53471	279900	29951	117344	13977200	1280834	81620	26974	467846	56229759	115580	3628857	962952	16248	27162	2442335	300376
Igla2	Ionopsidium glastifolium	2	BNr 113271	treatment_cold	5	23	2932385	51094	204588	122787	2457327	260347	251743	141052	20085	13075039	2048220	21735	57380	128348219	16201381	233742485	908721	98776354	21108668	5475560	117168054	390188880	7758	35953	143719	322854	37211	276357	14840727	667937	121043	9402	250589	80829566	243511	4779393	802064	31339	55245	2752575	125844
Igla2	Ionopsidium glastifolium	2	BNr 113271	treatment_warm	5	24	594029	826241	587004	69912	218778	45373	243221	10206	2953	2045230	70186	36105	73721	2316506	4299978	4234215	203809	26130189	689309	414739	3460811	149504862	18490	10549	17008	79937	20696	31142	5112580	336701	16293	2125	18297	2526728	41415	102624	162132	7138	15237	748926	138204
Igla2	Ionopsidium glastifolium	2	BNr 113272	control_cold	5	28	801995	48965	132584	70058	85673	115157	31135	46780	24291	1286280	94947	41602	167096	10878864	1210714	21366063	63332	4484524	2303358	169898	25917795	5141037	8459	25562	238488	47078	5960	115039	3355439	943932	49862	1731	166823	4839347	52209	2844402	334828	7623	9605	379842	160749
Igla2	Ionopsidium glastifolium	2	BNr 113272	treatment_warm	5	29	728096	16771	53725	27388	40815	117284	22964	16644	13199	971474	30391	11545	56414	5553997	275655	8619223	28163	4091333	1955175	78926	16093335	3775850	6162	13145	122210	10354	4263	40205	2674120	460396	14152	926	52858	2444682	42261	959795	208212	3875	2805	255689	41613
Igla2	Ionopsidium glastifolium	2	BNr 113274	treatment_cold	5	33	23252321	648840	339396	287870	73229	972205	1350481	1136007	49849	110055353	6619033	38270	73191	64707037	18316593	79770743	1028268	59634049	6902706	3133563	164765405	4619749974	31565	29228	15802	176961	19220	92764	3733441	1313590	59248	4119	126465	12698230	132868	1573560	343081	16788	33033	994455	194007
Imeg	Ionopsidium megalosperma	2	BNr 113279	control_cold	5	28	695617	13156	17653	36970	100689	57882	105681	62406	9810	1040771	174963	45947	48836	2312097	932090	4691273	82143	904305	1172631	535144	3227567	182960043	1152	8499	196729	80879	11347	41282	2498199	702368	40781	920	76842	2226668	63527	705845	143882	6124	2894	743180	30142
Imeg	Ionopsidium megalosperma	2	BNr 113279	treatment_cold	5	23	1345870	122138	73799	34896	462966	310286	573619	91113	21092	8188254	1136582	48253	77375	27707677	8963251	77710918	565188	11587883	23670487	7974270	31905046	426143985	10239	44972	394757	124223	13811	106278	5133404	1850352	48991	6816	569577	34230750	189616	2465694	491097	21260	12243	1129414	100279
Imeg	Ionopsidium megalosperma	2	BNr 113284	control_cold	5	29	923023	294085	14418	219371	510699	386887	231112	75599	8792	1129447	134695	52781	91366	3537001	1806443	1959328	242259	577243	903176	615221	6099489	98656011	19367	40139	203122	215588	5205	28788	4220116	574173	34295	8941	124166	7876210	81542	606509	185074	12138	25861	3320824	65809
Imeg	Ionopsidium megalosperma	2	BNr 113284	treatment_cold	5	28	868138	17433	40135	51777	416564	881490	2003147	97736	8160	8464007	1215853	40978	98346	22690761	5137301	27259125	532652	6840192	9314714	2378486	11520163	171195938	966	12260	417368	50288	16508	80428	6273024	852446	58138	2781	286866	18114886	84751	2068590	208752	14064	4328	1489626	41051
Ipro	Ionopsidium prolongoi	2	BNr 113257	control_cold	5	24	861094	44834	66869	57747	76006	106595	28581	53027	15586	1416822	82669	22022	132276	13872989	577167	10493720	42145	4200181	3007966	84729	33367551	6660761	3909	12148	136883	42031	5803	55753	2301763	560581	28867	1810	118731	3756011	68388	1421251	270476	6860	8604	649788	56052
Ipro	Ionopsidium prolongoi	2	BNr 113257	treatment_cold	5	29	1517767	121904	320841	111977	124157	546686	196908	149595	65074	7742647	192254	18011	95035	90583406	3180959	126448412	225603	49738229	22499262	427395	168940535	43466531	13216	27987	254134	85828	12933	121451	11298399	2397341	84808	3495	454768	14670594	192559	5511104	558733	16315	24941	1861535	177627
Ipro	Ionopsidium prolongoi	2	BNr 113260	control_cold	5	27	649468	47788	40941	24052	36550	156246	22495	22205	20725	897330	39231	28251	49104	8892507	896468	25960015	31972	5044632	3045654	3405055	20675876	171198064	5834	12492	113853	19634	5925	75572	2654413	395932	19697	1750	126771	3406041	63291	2153203	113459	4000	3445	171838	40788
Ipro	Ionopsidium prolongoi	2	BNr 113260	treatment_cold	5	25	2125586	24392	225978	214111	933364	1491702	3033215	101560	30885	17270809	675020	90280	73084	87653327	23036451	143447919	1150987	76873400	12525736	7455742	113945515	146713826	2068	47254	30439	240601	65035	180282	6493341	82774	103189	7034	165965	29889095	292005	6422703	726778	22473	65835	2535943	447658
Ipro	Ionopsidium prolongoi	2	BNr 113261	control_cold	5	24	3059858	151312	102838	39054	386610	198747	577670	30730	7947	2361193	11014365	42750	56641	11654214	2415261	19209991	121199	4959592	1749919	428521	11934757	2856063080	10059	11237	12507	156622	9123	49648	2100692	452372	36827	1924	47601	8373564	73520	1598769	370887	13219	15102	819028	161449
Ipro	Ionopsidium prolongoi	2	BNr 113261	treatment_cold	5	25	19897349	434775	382477	253732	330259	838307	3769221	967878	91046	47508768	23644293	67304	117161	352404906	97200598	718881414	7402507	216405064	213035546	95339305	372485721	7186855425	35638	122100	754119	792454	130109	943541	42557507	905946	301426	32615	2261458	186213823	1028021	29270350	2509376	77622	97547	11171132	607028
Ipro	Ionopsidium prolongoi	2	BNr 113262	control_warm	5	20	3226914	151821	113659	43211	452446	302605	1010998	39207	16794	3604099	12769789	69220	91261	16838001	2552984	31029763	167796	5699379	2346274	531753	16268954	5144539275	11057	17857	17519	279739	12745	83023	2825309	658571	41805	2405	55501	13835735	95803	2979154	669960	18283	25598	1101235	320705
Ipro	Ionopsidium prolongoi	2	BNr 113262	treatment_warm	5	27	15545098	291538	97729	34688	1025836	131889	793248	36235	5735	3882014	7815684	38120	82817	13420427	2236510	26200734	4220057	4136497	67750387	24706045	18747565	2015303714	19797	18646	226278	121025	19545	73375	2853738	392518	24151	1598	54463	11259114	59909	1460070	287279	8906	18708	1516394	286604
Ipro	Ionopsidium prolongoi	2	BNr 113264	control_cold	5	25	3121135	9058	99437	59923	515489	233244	687803	38546	15146	2725933	224453	42828	48919	13162859	3645359	23877188	133334	3270959	1528141	11179716	18842097	1044439351	595	20955	12591	140609	14060	54842	2792154	22251	41347	2084	96830	8830667	83942	1152492	319352	8661	18144	1054944	321455
Ipro	Ionopsidium prolongoi	2	BNr 113264	treatment_cold	5	24	23015404	595672	489965	404444	56664	1638721	2497449	748781	118582	59479409	11052130	29125	68829	159496263	109514941	435959567	7624537	98630592	159197058	48569222	408955420	2082388867	63113	157279	959797	359391	77535	424161	31656213	2664684	353482	49489	3246706	140691794	802431	19336604	1304844	61406	79306	5694582	688971
Ipro	Ionopsidium prolongoi	2	BNr 113266	control_warm	5	18	3166309	10638	109530	45167	880357	223843	714423	38169	13285	3096515	136994	48458	51916	9416611	3117499	27367224	98150	5659325	2266241	11838992	23925708	1170901272	521	23816	8779	152211	16062	75310	1909033	23867	41688	2754	97353	11452717	62047	1230587	526561	10820	20384	1321435	370680
Ipro	Ionopsidium prolongoi	2	BNr 113266	treatment_warm	5	26	3587844	225432	181739	85114	1530659	329244	1312123	64060	14107	3763198	185417	78836	96190	9558396	4203148	32331204	151318	7687515	3382474	11848285	34829999	2136460469	612	42022	10098	274322	28562	143144	3196064	31004	79101	3726	168902	19469463	80844	2175235	905364	19133	30737	2274760	672104
Ipro	Ionopsidium prolongoi	2	BNr 113267	control_cold	5	28	2643493	10930	54397	60307	751887	184629	476601	48313	11159	2827424	201525	59880	62465	16684943	2661275	27312774	130267	5499365	2130047	10165565	13941713	820505429	660	13342	9931	190368	17004	50079	2902111	13828	47524	1834	62047	5997878	54191	1219421	444321	10415	15389	1263735	299113
Ipro	Ionopsidium prolongoi	2	BNr 113267	treatment_cold	5	20	19583912	476281	429069	540364	68126	984633	2450911	1153299	90757	68960690	11241350	56295	66608	124789847	67145642	413230826	5589836	97900836	140913911	81313950	333880564	1409652171	77601	114537	593389	313139	113561	630382	21916318	2374464	423283	58532	2523475	176710630	570102	27548765	2040739	76562	84973	9169389	557139
Ipro	Ionopsidium prolongoi	2	BNr 113268	control_cold	5	24	1069249	296169	18793	126394	540871	513759	403330	72017	22184	1945095	179649	80994	91999	2110812	3735326	2959783	146178	742530	874397	599526	5311148	177600164	17612	25860	218467	178491	9351	34966	3894903	396792	38420	8190	158381	12323422	58745	465171	268446	12897	13823	3493553	60009
Ipro	Ionopsidium prolongoi	2	BNr 113268	treatment_cold	5	25	597235	490268	34672	280084	782813	3544623	2819096	124295	21097	12335778	3017956	97831	159619	17278694	12526867	58722658	1753056	22543222	13198270	10581959	47914453	459266948	16478	35780	536027	159863	29228	74949	11355447	1012841	73845	30868	803520	79633531	176491	1311533	350429	30358	35631	2575861	62288

## Sheet: normalized
x	x	x	x	x	x	x	Alkaloid	Alkaloid	Amino acid	Amino acid	Amino acid	Amino acid	Amino acid	Amino acid	Amino acid	Amino acid	Amino acid	Amino acid	Carbohydrate	Carbohydrate	Carbohydrate	Carbohydrate	Carbohydrate	Carbohydrate	Carbohydrate	Carbohydrate	Carbohydrate	Fatty acid	Fatty acid	Organic acid	Organic acid	Organic acid	Organic acid	Organic acid	Organic acid	Organic acid	Organic acid	Organic acid	Organic acid	Organic acid	Organic acid	Organic acid	Unk	Unk	Misc.	Misc.
pop	species	run	BNr	treatment	bioclim_cluster	mg extracted	Pseudo-tropine/Tropine #1	Pseudo-tropine/Tropine #2	Alanine	Asparagine	Aspartic acid	Glutamic acid	Glycine	Isoleucine	Proline	Serine	Threonine	Valine	Fructose	Glucopyranose?	Glucose	Glucose, 1,6-anhydro-beta	Mannose	Myo-inositol	Saccharic acid	Sorbose	Sucrose	Hexanoic acid	Octadecanoic acid	2-Ketoglutaric acid	Ascorbic acid	Butanoic acid, 4-amino	Caffeic acid	Citric acid	Dehydroascorbic acid	Ferulic acid	Fumaric acid	Glyceric acid	Malic acid	Oxalic acid	Phosphoric acid	Threonic/Erythronic acid	RT:19.905 unknown	RT:20.075 unknown	1-pyrrline-3-hydroxy-5-carboxylic?	Ethanolamine
21	Cochlearia macrorrhiza	1	BNr 109697-1	control_cold	2	21	693	26	59	493	91	237	6	6	3062	62	27	114	3772	785	19463	18	2666	1330	309	3327	192638	6	5	33	125	14	48	256	93	30	4	15	2760	4	174	184	7	1	306	125
21	Cochlearia macrorrhiza	1	BNr 109697-1	control_warm	2	21	73	57	99	265	12	215	6	1	1200	53	7	151	29	316	16148	1	6416	745	278	13708	124761	8	9	8	71	3	9	25	237	9	2	43	517	23	547	628	3	4	315	61
21	Cochlearia macrorrhiza	1	BNr 109697-1	treatment_cold	2	18	1127	202	97	269	1013	2411	83	23	8294	1127	73	132	54597	8180	71983	514	30769	30606	6793	83817	435738	23	37	258	103	23	162	9112	897	106	8	389	38385	179	4819	507	25	11	4245	62
21	Cochlearia macrorrhiza	1	BNr 109697-1	treatment_warm	2	19	651	123	73	253	44	137	7	3	3410	59	82	163	9681	678	12512	37	5441	2228	250	10958	260794	6	13	48	83	16	54	530	327	25	1	21	2911	16	2974	533	7	3	406	92
21	Cochlearia macrorrhiza	1	BNr 109697-2	control_cold	2	43	158	19	93	13	48	1085	118	13	1676	259	16	50	20150	4289	15911	69	2754	3539	728	9079	10330	9	6	403	214	17	59	4368	1542	31	3	82	17546	154	1304	683	17	9	1401	64
21	Cochlearia macrorrhiza	1	BNr 109697-2	treatment_cold	2	34	841	132	95	599	1127	3418	7	4	7105	171	98	149	37403	3517	126219	253	33343	12504	1546	38231	560479	9	16	47	68	22	83	514	560	27	3	61	11284	18	4719	481	10	4	547	179
21	Cochlearia macrorrhiza	1	BNr 109697-3	control_warm	2	42	704	90	61	478	85	259	9	5	3004	63	81	183	12554	727	25207	62	5010	1273	298	11233	342224	11	13	52	108	21	62	698	246	28	3	20	3285	7	152	215	10	4	503	148
21	Cochlearia macrorrhiza	1	BNr 109697-3	treatment_warm	2	32	539	92	49	588	86	184	8	4	2637	59	59	158	9847	808	21796	71	3693	1205	219	9760	277498	8	12	40	95	24	61	629	281	28	2	19	3828	7	164	275	7	3	388	134
32	Cochlearia pyrenaica	1	BNr 112747	control_cold	2	26	26	24	11	5	134	70	17	18	266	38	42	62	1321	284	2799	32	37	322	70	3991	3245	5	12	34	25	4	15	2716	115	14	1	131	2692	36	1369	81	3	2	639	5
32	Cochlearia pyrenaica	1	BNr 112747	treatment_cold	2	25	380	126	44	164	1319	3831	28	9	8238	677	16	39	58294	6919	181871	791	124407	28249	8273	44112	1222146	10	18	113	49	18	65	4676	489	28	4	177	32513	71	1349	196	8	6	1345	56
32	Cochlearia pyrenaica	1	BNr 112749	control_warm	2	28	250	28	84	29	120	1028	240	12	1828	514	36	70	24356	5853	30591	111	6634	4185	2161	19544	27253	14	14	652	441	22	90	6128	2013	45	5	136	14679	146	1669	1197	34	19	2327	90
32	Cochlearia pyrenaica	1	BNr 112749	treatment_warm	2	21	313	33	116	38	211	1206	206	21	1671	452	56	99	23253	5182	33394	238	6906	4083	1937	29998	24316	18	23	590	367	38	121	11807	1878	48	5	230	13429	134	2701	1196	31	26	2049	76
32	Cochlearia pyrenaica	1	BNr 112751	control_warm	2	27	259	174	124	47	792	431	139	120	1742	243	263	536	11787	3062	18944	248	453	3684	667	32889	36724	52	69	413	168	38	145	21789	871	120	10	744	15357	327	8787	533	18	21	3644	46
32	Cochlearia pyrenaica	1	BNr 112751	treatment_warm	2	16	140	142	61	29	421	293	120	53	961	197	143	383	8739	1372	9377	115	337	2610	625	18152	23441	26	45	289	113	17	82	11320	530	98	6	332	11752	161	4827	335	12	13	1677	20
32	Cochlearia pyrenaica	1	BNr 112753	control_cold	2	46	9	9	3	1	27	14	8	3	65	12	8	15	492	45	328	7	12	122	30	631	994	1	3	14	4	1	5	639	35	6	0	19	508	9	218	22	1	1	73	1
32	Cochlearia pyrenaica	1	BNr 112753	treatment_cold	2	36	264	43	16	77	19	64	17	4	1891	145	5	15	6026	910	21196	56	9697	3121	963	12781	107599	5	9	45	26	7	18	1946	159	13	1	42	4166	25	917	119	3	2	679	14
33	Cochlearia pyrenaica	1	BNr 113003	control_cold	2	19	401	90	54	7	304	77	85	19	988	59	79	184	2494	1917	4502	68	1287	1179	795	5111	8494	6	13	110	49	17	23	11682	315	23	3	84	3944	172	2063	96	7	4	2094	21
33	Cochlearia pyrenaica	1	BNr 113003	treatment_cold	2	24	4661	650	303	68	2130	3083	533	102	13560	2193	167	247	82860	15099	161716	1291	45728	63012	24529	74369	1272029	84	130	958	345	127	594	71035	2564	280	34	2036	103579	598	32128	1253	51	47	12534	121
33	Cochlearia pyrenaica	1	BNr 113007	control_cold	2	23	1054	158	81	15	287	397	44	32	385	173	79	114	1144	881	4626	25	1540	1736	524	4112	26208	8	11	27	22	16	92	7181	511	26	1	323	6378	260	2859	110	17	14	1368	25
33	Cochlearia pyrenaica	1	BNr 113007	treatment_cold	2	23	1523	228	113	24	2421	4521	132	51	3495	860	124	274	18544	5008	35961	552	13397	19092	8330	30823	274507	27	63	248	127	28	99	15428	1230	70	9	560	42343	316	7965	529	23	15	3825	32
33	Cochlearia pyrenaica	1	BNr 113009	control_warm	2	16	1715	307	248	40	851	1193	187	70	3222	419	319	746	11606	5588	20318	138	3879	3466	3167	25725	37320	27	97	142	224	61	288	44798	1004	262	11	807	17868	790	9588	1032	21	45	5943	35
33	Cochlearia pyrenaica	1	BNr 113009	treatment_warm	2	23	955	144	73	22	290	319	100	28	1190	157	114	242	3825	1568	6030	68	1117	1970	777	7404	19039	16	32	133	62	22	83	12035	434	74	3	240	7727	194	4155	320	14	11	2298	25
140	Cochlearia borzaeana	1	BNr 106723-1	control_warm	3	21	1636	504	167	1476	487	1976	649	63	3584	758	362	461	5135	10486	3226	605	2362	6065	7849	22438	27693	34	44	521	603	47	229	10923	2264	57	7	34	28568	174	4368	3125	24	20	10973	333
140	Cochlearia borzaeana	1	BNr 106723-1	treatment_warm	3	31	518	161	101	1281	407	872	204	26	3497	233	125	130	2553	4598	3647	228	1186	2359	2328	6634	12375	11	23	250	172	14	86	4709	962	42	4	13	9196	80	1751	883	8	14	3440	122
140	Cochlearia borzaeana	1	BNr 106723-2	control_cold	3	39	285	52	26	779	200	84	57	0	1610	17	23	55	465	3472	2390	47	274	631	1100	968	193	12	11	163	89	1	29	618	119	26	2	1	5907	6	697	163	1	1	1687	87
140	Cochlearia borzaeana	1	BNr 106723-2	treatment_cold	3	28	1519	854	248	3750	1143	5415	539	77	28275	2427	115	197	45128	39457	70161	4007	29232	22091	24816	59103	293229	34	107	788	744	67	267	12525	3552	105	15	70	81358	210	3942	1626	31	49	8248	504
140	Cochlearia borzaeana	1	BNr 106723-3	control_warm	3	16	1014	457	224	2019	600	1530	146	33	4576	315	98	242	10005	3403	8439	432	603	2290	2460	11600	16047	21	44	360	230	20	103	4579	1191	27	12	17	16726	251	3893	1088	33	24	6927	289
140	Cochlearia borzaeana	1	BNr 106723-3	treatment_warm	3	25	488	182	118	1279	342	1104	161	25	3635	188	107	189	4120	5337	4368	336	890	2212	1876	5378	9514	17	33	257	307	8	90	4306	687	38	6	10	11263	99	2063	649	13	10	5158	170
140	Cochlearia borzaeana	1	BNr 106723-5	control_cold	3	32	364	337	69	842	217	489	115	13	1539	174	84	314	1470	4670	1884	258	962	1900	3931	12929	16694	8	20	280	297	32	94	5564	867	15	4	5	5974	43	1606	542	6	5	5214	75
140	Cochlearia borzaeana	1	BNr 106723-5	treatment_cold	3	29	1131	280	168	1208	237	850	17	7	10027	239	71	177	42064	3102	107249	312	22933	6317	2786	48311	34299	20	20	119	191	50	107	1346	979	43	4	57	9029	23	309	1149	21	10	856	307
145	Cochlearia tatrae	1	BNr 108776	control_cold	3	32	1975	1049	29	415	218	195	32	17	38	9	12	76	45760	6512	73908	183	17992	10576	2304	49924	15216	27	25	15	328	52	86	3791	1965	68	4	50	8445	76	4417	950	26	11	796	101
145	Cochlearia tatrae	1	BNr 108776	treatment_cold	3	38	1098	1242	88	625	4600	11537	103	65	3888	909	190	266	85252	32943	174180	2234	44443	10867	11166	102560	192328	43	121	62	469	44	242	13744	1381	67	14	465	44973	189	6528	1005	42	29	2147	321
145	Cochlearia tatrae	1	BNr 108776-7	control_cold	3	28	1579	2077	12	527	155	346	11	9	54	6	27	79	47694	11462	57359	565	21233	11288	1491	49808	19117	48	23	22	266	49	81	8779	1838	39	5	57	9465	45	4396	710	30	19	1702	153
145	Cochlearia tatrae	1	BNr 112722	treatment_cold	3	35	2108	2676	81	617	436	1302	62	28	657	263	19	63	187960	33413	690577	2522	295168	106680	21507	292200	223893	47	119	682	560	75	252	19164	1998	135	10	419	42685	256	9633	2464	59	46	2647	353
145	Cochlearia tatrae	1	BNr 112988	control_warm	3	24	194	295	404	1321	1140	2145	664	123	13559	4257	696	492	40947	20220	68658	1422	11025	11253	6277	36347	2619671	17	180	4157	1109	124	579	46208	6899	568	14	1479	54339	1744	12922	2105	129	49	9482	322
145	Cochlearia tatrae	1	BNr 112988	treatment_warm	3	39	48	59	102	435	205	428	200	26	4504	756	122	158	8759	3719	13741	361	2924	4194	1577	8660	887712	3	37	836	213	32	106	10883	2114	111	3	283	10977	305	2783	480	31	9	2357	114
145	Cochlearia tatrae	1	BNr 112989	control_warm	3	37	80	115	180	1567	1292	1641	351	69	13351	1272	304	688	19761	10101	17912	789	8571	12857	2379	17961	66325	6	93	1552	444	81	226	35377	3730	204	7	907	28358	797	9088	1689	98	30	3441	156
145	Cochlearia tatrae	1	BNr 112989	treatment_warm	3	38	68	75	126	1063	583	1005	203	36	10638	711	184	309	11930	7051	18492	499	4025	6821	2383	12923	43537	3	44	1593	224	41	209	16633	2797	118	3	512	18960	356	5760	779	64	17	3555	126
145	Cochlearia tatrae	1	BNr 112990	control_cold	3	40	19	39	91	423	378	395	117	12	4314	476	57	186	8253	2497	11870	193	1473	2442	1707	3952	12387	2	19	709	123	28	86	6825	774	58	2	189	8139	239	2610	385	44	9	1025	78
145	Cochlearia tatrae	1	BNr 112990	treatment_cold	3	48	45	62	98	658	1394	5310	173	16	17484	2146	74	159	32504	14540	45858	959	11757	16035	5826	31883	361856	2	23	702	130	48	146	10609	1576	110	5	722	32992	238	3069	407	30	11	2272	116
145	Cochlearia tatrae	1	BNr 112991	control_cold	3	35	49	34	72	217	152	437	208	19	2858	357	80	157	5965	3472	8152	363	1662	4239	1227	5456	792711	2	30	443	105	22	48	11029	2116	51	3	246	10941	217	1945	328	23	5	2381	64
145	Cochlearia tatrae	1	BNr 112991	treatment_cold	3	32	297	137	76	797	1061	1890	252	35	20894	2361	95	179	70372	26445	132840	1666	38506	47622	18699	62951	1461015	19	87	1215	280	32	326	16927	3670	127	13	1378	79086	519	6540	1136	61	41	3054	195
148	Cochlearia alpina	1	BNr 113037	control_cold	4	28	5530	1540	1348	1072	473	426	1700	44	13204	946	29	74	130879	58734	214291	4735	74269	117142	22369	156073	1173889	63	234	740	775	15	858	40340	7790	176	52	1664	72704	820	10748	2862	69	89	5569	337
148	Cochlearia alpina	1	BNr 113037	treatment_cold	4	29	358	91	102	385	4901	11231	170	35	14518	1602	90	238	38627	29531	69502	1659	34414	48939	8365	64745	545061	27	54	738	349	41	438	14623	5886	140	8	1246	47542	515	4841	1242	45	83	3077	228
148	Cochlearia alpina	1	BNr 113038	control_warm	4	44	779	146	20	1047	3029	1273	53	17	3562	671	15	45	15422	4475	24069	325	5483	20350	1596	48176	34485	32	96	368	366	11	595	12357	9578	186	5	586	3507	665	9197	1116	33	48	1872	112
148	Cochlearia alpina	1	BNr 113038	treatment_warm	4	41	375	76	16	411	1637	625	41	12	1581	525	7	35	9126	2559	10933	209	2085	12886	1078	21096	26374	16	55	242	149	8	331	9278	4329	107	4	353	2837	272	3948	615	23	39	721	95
148	Cochlearia alpina	1	BNr 113041	control_cold	4	31	4047	1720	656	362	367	328	1106	25	10512	863	22	57	47590	25979	112186	2356	35794	132127	9998	77434	610045	39	147	391	287	8	356	42875	3885	80	30	651	65211	487	5178	2921	28	56	2809	224
148	Cochlearia alpina	1	BNr 113041	treatment_cold	4	32	3195	1055	840	479	270	226	739	17	6695	668	13	35	69615	24044	100561	2232	39091	101318	13430	78388	472209	38	98	295	305	9	373	27591	4576	108	29	905	54861	516	7641	2207	38	48	2286	302
152	Cochlearia danica	1	BNr 112806	control_cold	1	31	211	35	107	199	205	25	149	38	4082	296	98	466	50276	1648	27995	105	10284	9602	109	39687	9447	11	37	746	124	9	75	6147	1519	68	5	325	8704	277	3175	670	13	13	2249	276
152	Cochlearia danica	1	BNr 112806	treatment_cold	1	34	193	238	148	402	1438	342	182	68	16096	701	76	186	167016	12030	293559	792	146152	52043	1845	304300	189748	34	75	530	105	26	194	13066	2490	76	8	608	52524	201	6885	1282	30	17	1629	316
152	Cochlearia danica	1	BNr 112807	control_warm	1	30	237	477	443	472	737	248	213	175	15870	672	114	1152	83002	10210	193569	373	36311	14753	1273	112943	21543	44	247	1985	421	61	679	16272	4316	282	20	1037	28903	497	18603	1301	33	68	4326	1065
152	Cochlearia danica	1	BNr 112807	treatment_warm	1	33	182	465	227	321	386	131	168	79	6632	358	109	496	50831	4301	87230	238	18212	10758	536	69749	17718	30	79	781	140	24	331	10851	2687	136	8	452	22873	207	8079	943	39	28	1540	439
152	Cochlearia danica	1	BNr 112808	control_warm	1	26	407	597	766	1346	1197	408	293	167	13398	610	231	1420	176020	9967	140977	422	39467	42552	1413	185522	42899	57	166	3532	518	77	566	28866	3503	305	29	1732	26545	842	12504	2630	31	92	6380	225
152	Cochlearia danica	1	BNr 112808	treatment_warm	1	32	225	230	194	389	329	115	192	44	5248	312	123	448	57961	3075	59537	157	19288	10277	451	93266	23419	21	55	794	125	19	319	9997	1975	116	7	391	13972	255	5477	1101	23	29	2142	323
152	Cochlearia danica	1	BNr 112811	control_cold	1	36	146	343	197	282	464	84	130	44	7756	110	43	516	19586	3539	89258	171	12687	5676	506	35858	21290	22	75	500	25	13	360	3027	2738	145	6	319	15723	165	5319	777	31	35	748	384
152	Cochlearia danica	1	BNr 112811	treatment_cold	1	38	292	528	180	303	806	380	259	87	13701	346	48	154	180812	8096	342752	403	109127	36726	1087	225604	73014	34	60	705	122	20	332	23443	4035	163	6	716	26073	343	10147	1087	26	40	2932	490
153	Cochlearia alpina	1	BNr 112726	control_cold	4	33	1164	1362	89	492	479	336	64	3	856	289	116	88	32535	1851	50928	97	8325	2581	1359	26858	8441	8	113	3423	28	14	105	12174	304	51	4	254	6327	359	1513	2054	24	10	465	45
153	Cochlearia alpina	1	BNr 112726	treatment_cold	4	32	3826	3163	56	276	2996	8613	26	13	219	26	20	78	187582	31701	353595	2459	112281	65504	12519	172282	109357	21	30	33	226	33	156	9575	1542	60	10	253	26260	117	5867	770	38	22	1373	206
153	Cochlearia alpina	1	BNr 113034	control_warm	4	39	389	227	38	243	93	124	19	1	124	106	14	34	6244	604	16082	28	2573	820	498	9017	1403	3	58	1091	8	2	59	1535	117	28	1	68	2122	149	220	471	9	3	63	7
153	Cochlearia alpina	1	BNr 113034	treatment_warm	4	39	4749	3675	48	982	480	694	51	33	136	20	47	219	87789	20046	141935	883	39069	24330	5399	120293	33130	77	77	39	600	87	263	17078	3325	136	10	243	15713	191	10762	2378	60	37	2817	490
153	Cochlearia alpina	1	BNr 113035	control_cold	4	34	1065	1294	127	486	298	494	48	2	250	219	29	89	19250	1660	34658	35	3347	1743	511	28370	11155	6	79	2584	19	5	61	7286	301	37	7	86	5273	212	736	566	14	5	294	41
153	Cochlearia alpina	1	BNr 113035	treatment_cold	4	39	736	1011	22	152	2125	4410	17	7	197	140	17	29	64708	14436	200512	1084	92923	29894	5430	134495	73287	11	57	338	124	19	88	3439	508	45	6	132	11234	87	1971	721	13	15	644	102
153	Cochlearia alpina	1	BNr 113036	control_warm	4	26	1601	811	114	766	539	629	69	6	666	171	109	162	28038	1301	64506	47	5801	1350	2376	36240	10663	9	121	3525	27	16	146	12697	476	98	8	150	3628	558	1155	962	23	13	569	59
153	Cochlearia alpina	1	BNr 113036	treatment_warm	4	34	3175	2919	65	541	418	615	29	36	141	16	51	110	91049	10839	116986	559	28197	16163	4284	108288	17841	47	61	52	443	98	339	14141	2025	122	13	238	20141	196	13319	1521	58	39	2357	566
156	Cochlearia scotica	1	BNr 112800	control_warm	1	36	3681	2253	290	2119	1676	3104	158	105	10349	509	364	763	6606	21827	5593	2189	1531	3537	2119	21418	5483	100	180	173	628	29	237	56392	1579	5	80	236	76598	324	20498	5806	24	30	4947	222
156	Cochlearia scotica	1	BNr 112800	treatment_warm	1	36	2682	1100	419	2266	1109	2822	246	50	7209	805	164	427	4712	16633	8750	958	1968	1965	2259	9644	3251	75	185	212	297	14	312	33003	1962	3	40	229	37940	300	14454	3221	16	44	2927	205
156	Cochlearia scotica	1	BNr 112801	control_warm	1	33	2286	219	384	37	419	2147	379	9	7997	1167	192	910	9774	15820	5207	338	1329	1085	1344	5372	3392	41	51	712	300	28	272	20054	237	64	7	173	8151	112	3717	455	30	27	6408	610
156	Cochlearia scotica	1	BNr 112801	treatment_warm	1	35	2896	306	389	69	1378	2310	484	10	17127	1800	258	910	8899	14204	8182	700	1253	2238	2279	13173	6660	45	117	924	461	39	299	18667	828	123	22	433	11209	244	8109	795	96	26	13513	1282
156	Cochlearia scotica	1	BNr 112802	control_cold	1	41	528	53	46	6	96	562	33	1	1180	219	20	95	2349	3991	488	42	211	179	161	1018	872	6	9	78	66	3	59	4291	40	16	1	28	1658	23	907	45	3	5	1698	151
156	Cochlearia scotica	1	BNr 112802	treatment_cold	1	32	2078	848	285	1217	1371	7544	379	61	28339	1842	64	169	156505	29715	291476	2800	173164	62214	4635	215209	580355	88	117	1038	349	22	403	35216	3996	99	27	881	88298	265	12484	2217	46	56	2759	373
156	Cochlearia scotica	1	BNr 112804	control_cold	1	28	1266	80	111	23	77	1298	89	4	3659	408	45	378	4841	3092	3244	142	351	527	554	2752	916	20	20	366	125	12	151	11213	76	36	4	64	2764	31	1717	108	16	9	2348	358
156	Cochlearia scotica	1	BNr 112804	treatment_cold	1	30	80	177	134	340	379	3618	78	38	5982	228	32	78	54645	1654	154886	275	57304	19022	828	77185	61026	14	39	335	49	17	119	6848	991	64	5	302	22032	88	2940	662	18	19	792	169
159	Cochlearia scotica	1	BNr 112731	control_warm	1	24	112	421	511	381	1071	305	187	291	18301	938	46	628	82029	16191	263466	467	54534	21719	481	156102	23565	31	463	2503	708	43	766	26403	1664	414	21	1092	31447	198	9772	1177	9	66	4136	1241
159	Cochlearia scotica	1	BNr 112731	treatment_warm	1	37	194	367	151	283	406	79	145	84	5855	165	127	283	51624	3183	96144	156	17297	12986	330	69034	17252	33	48	528	96	26	163	10238	2229	108	7	318	12386	213	5517	733	32	18	1309	286
159	Cochlearia scotica	1	BNr 112763	control_cold	1	29	95	259	434	532	853	247	126	137	7581	418	46	380	85364	7756	94160	260	29086	30741	262	125827	23027	20	152	2186	427	27	313	22985	663	220	15	895	14172	164	3223	1167	4	44	2993	128
159	Cochlearia scotica	1	BNr 112764	control_warm	1	29	13	49	48	46	141	28	17	19	1391	64	7	27	7319	604	18320	44	6374	2585	33	22416	4342	5	23	137	28	3	40	3931	196	25	1	60	2997	17	545	170	1	4	245	63
159	Cochlearia scotica	1	BNr 112764	treatment_warm	1	41	87	148	71	180	276	45	76	27	3941	149	71	148	23197	2084	31902	76	10717	8355	245	29728	9212	20	30	248	62	13	108	9469	1553	46	4	220	6634	122	3828	607	13	15	1220	191
159	Cochlearia scotica	1	BNr 112768	control_cold	1	26	2	5	7	9	13	7	2	2	319	6	1	3	666	87	3633	5	597	178	7	641	815	1	3	11	5	1	7	538	36	1	0	13	641	5	71	4	0	1	24	14
159	Cochlearia scotica	1	BNr 112768	treatment_cold	1	40	58	221	141	1507	289	157	135	15	11267	1943	21	50	85925	15468	198986	872	73810	20602	5258	115665	278593	5	34	126	250	30	164	9774	377	69	7	291	48592	226	2941	829	24	60	1605	80
159	Cochlearia scotica	1	BNr 112769	treatment_cold	1	39	44	118	62	80	652	260	57	15	4701	152	25	62	54215	3122	76949	154	47444	19424	614	91445	42367	7	14	185	28	6	80	3337	537	35	3	202	17799	45	1510	226	7	6	695	114
161	Cochlearia scotica	1	BNr 112656	control_warm	1	27	397	319	244	220	1257	294	180	62	6752	326	26	278	87634	3839	144585	234	50013	17890	25439	37511	41246	4	133	738	132	12	517	24847	735	179	18	664	31745	271	11250	1484	26	24	594	316
161	Cochlearia scotica	1	BNr 112656	treatment_warm	1	43	163	134	80	159	333	89	96	44	2541	164	74	143	27595	2275	70500	92	15319	10064	8310	49967	438496	14	39	463	57	15	186	7597	1132	74	5	297	11380	164	4986	508	17	9	719	157
161	Cochlearia scotica	1	BNr 112935	control_warm	1	22	4	99	174	90	175	4	22	30	4256	155	6	39	2840	418	54104	82	7880	3877	118	62	4798	15	45	48	65	4	130	2757	773	27	1	257	7200	80	426	50	1	6	63	121
161	Cochlearia scotica	1	BNr 112935	treatment_warm	1	44	85	104	108	193	266	77	89	45	3490	142	60	161	32073	1287	58420	108	10252	6669	3315	46742	9426	13	31	369	50	11	102	7806	1247	61	4	227	7611	116	3087	363	15	11	651	155
161	Cochlearia scotica	1	BNr 112937	control_cold	1	25	111	16	100	163	332	105	139	11	2189	191	80	128	14885	3678	44072	30	14647	5789	6785	55679	734752	16	46	555	77	19	179	12904	966	103	5	298	16524	196	5410	513	14	13	1209	159
161	Cochlearia scotica	1	BNr 112937	treatment_cold	1	42	26	231	222	1273	995	3745	138	21	15300	882	74	67	85087	18289	121864	1041	73024	12948	5692	86141	117553	2	47	39	218	50	139	5814	74	122	6	122	31239	237	4653	1018	29	54	3320	538
161	Cochlearia scotica	1	BNr 112943	control_cold	1	34	13	7	3	3	36	9	4	1	239	3	1	6	884	40	5007	1	1053	396	380	187	5638	0	2	2	4	0	5	449	2	2	0	6	333	2	155	31	1	1	24	6
161	Cochlearia scotica	1	BNr 112943	treatment_cold	1	46	111	77	80	132	88	450	96	10	10492	465	5	6	40642	17963	65451	1891	27182	26670	13293	68226	1361806	7	18	102	95	15	80	4732	305	46	10	220	24919	136	3141	300	11	13	1326	99
162	Cochlearia micacea	1	BNr 112724	control_cold	4	21	41	850	48	102	160	162	46	30	392	119	34	143	11327	2094	6919	235	1782	709	603	8219	328611	14	31	37	108	7	72	3259	195	21	2	78	5214	88	728	344	9	8	735	154
162	Cochlearia micacea	1	BNr 112724	treatment_cold	4	33	1194	1311	137	572	351	1078	39	17	10551	1734	57	62	47397	24729	102166	3795	50920	14446	6937	104982	724721	21	52	61	220	62	82	11186	835	41	13	141	29458	125	1746	696	18	30	540	310
162	Cochlearia micacea	1	BNr 112892	control_warm	4	26	251	4701	208	1242	891	2331	320	220	2288	1101	451	375	45316	9452	52025	1012	7108	4708	4251	63929	2692174	117	277	303	790	32	482	22932	1025	99	8	413	15569	506	6511	1871	54	46	2211	962
162	Cochlearia micacea	1	BNr 112892	treatment_warm	4	41	375	5051	340	1399	1087	2145	261	180	2026	1270	441	785	60107	17290	48168	1251	12860	4471	3675	75248	2807416	94	240	241	627	31	380	19963	1117	124	17	778	26824	458	9819	2330	69	54	4479	1151
162	Cochlearia micacea	1	BNr 112893	control_warm	4	37	2345	2428	264	1043	298	725	101	8	12643	541	378	205	7330	17865	24711	837	2179	4913	1867	10317	42168	17	21	54	408	129	95	21671	2684	99	10	83	16872	237	384	655	26	99	670	547
162	Cochlearia micacea	1	BNr 112893	treatment_warm	4	45	3827	2238	399	1015	410	1038	96	9	10994	454	351	454	16356	22829	34889	1556	4950	5480	1653	22024	42142	24	36	98	516	128	207	19716	2729	97	9	137	15964	280	570	1157	42	102	1093	459
162	Cochlearia micacea	1	BNr 112897	control_cold	4	22	9941	3736	416	1660	792	1782	230	10	13488	851	321	693	40263	48034	41079	1702	10210	6281	3331	38314	92434	39	64	148	590	248	389	34283	7180	162	13	357	25941	450	1444	2603	65	182	1128	840
162	Cochlearia micacea	1	BNr 112897	treatment_cold	4	29	6950	5635	359	2516	2113	9099	112	15	35429	2373	431	405	74038	118866	175967	6825	76674	33942	11449	168702	491975	1	67	222	1041	246	320	48348	3754	173	21	310	59808	421	867	1595	62	164	931	745
163	Cochlearia micacea	1	BNr 112725	control_cold	4	25	1119	1522	90	488	162	332	36	6	4337	176	62	194	5762	8535	7922	519	50118	1354	808	7002	280155	35	13	44	170	31	33	11910	731	38	5	30	3268	138	204	237	10	39	2003	146
163	Cochlearia micacea	1	BNr 112725	treatment_cold	4	35	3774	2446	275	1215	1466	4441	113	44	30849	2941	123	270	139669	80148	161704	4123	104713	25285	14288	156782	605345	66	150	95	785	126	218	20518	2264	139	27	537	71805	369	7046	1404	65	77	1975	827
163	Cochlearia micacea	1	BNr 112900	control_cold	4	21	3469	2235	422	1779	463	849	47	14	14744	343	276	367	14986	28483	22134	850	84264	6173	3072	33569	700222	98	58	125	366	149	146	34936	1760	109	7	93	9821	188	500	1046	55	109	3911	749
163	Cochlearia micacea	1	BNr 112900	treatment_cold	4	29	2970	4050	343	1349	953	3493	208	136	18325	5772	123	192	165687	80925	447278	7829	156371	54891	23728	257851	903583	100	177	130	1203	141	597	22223	3543	235	28	1234	89690	346	13826	1880	74	120	6475	958
163	Cochlearia micacea	1	BNr 112901	control_warm	4	26	2899	2709	264	1292	187	858	42	9	5872	348	149	345	18979	12823	24669	862	5345	4341	1070	26423	21723	39	36	43	489	165	137	20030	1838	71	7	54	10850	418	290	868	47	44	1477	340
163	Cochlearia micacea	1	BNr 112901	treatment_warm	4	24	4997	3352	384	1549	384	1235	79	12	14542	466	220	462	14636	26702	35107	1238	145860	5606	2454	28045	837505	90	61	130	551	148	146	34098	2919	116	11	81	15367	301	644	1134	43	94	5808	628
163	Cochlearia micacea	1	BNr 112902	control_warm	4	34	2774	979	216	1108	224	686	38	6	5558	243	178	193	12504	6742	21064	440	5717	3317	1086	19705	14011	33	17	38	456	145	99	20824	790	75	9	53	6821	298	347	374	21	61	1283	315
163	Cochlearia micacea	1	BNr 112902	treatment_warm	4	31	2127	1758	186	996	242	1012	45	8	6509	346	197	218	14769	10381	24581	638	4733	2689	866	17446	16214	26	26	60	349	114	91	20205	1414	71	7	68	7966	261	292	548	32	47	1626	387
169	Cochlearia scotica	1	BNr 112729	control_cold	3	33	88	30	12	27	9	78	7	1	419	2051	6	5	3255	395	7985	10	1174	345	14	8130	1180	1	5	1	25	1	9	62	42	3	1	16	2144	7	187	90	3	2	81	23
169	Cochlearia scotica	1	BNr 112729	treatment_cold	3	47	48	10	10	121	135	861	5	2	1728	2040	6	9	5940	1148	12258	83	6274	908	352	10537	575382	3	2	2	21	2	10	416	131	6	1	14	2231	15	212	38	2	3	130	27
169	Cochlearia officinalis	1	BNr 112968	control_warm	3	34	466	149	81	278	147	540	52	12	3078	6498	61	48	18115	3150	31444	114	7323	1787	246	41219	6404	16	35	7	208	9	91	1208	499	37	5	103	12715	58	1359	450	23	24	1203	230
169	Cochlearia scotica	1	BNr 112968	treatment_warm	3	32	190	62	49	424	125	429	27	6	2794	7855	33	39	9036	2247	15474	139	3400	1172	341	14591	2181732	11	12	9	108	8	33	1438	511	30	2	43	5418	63	977	274	10	13	785	159
169	Cochlearia officinalis	1	BNr 112969	control_cold	3	23	109	42	19	176	85	206	18	4	1122	2558	20	13	6227	1110	7444	61	2155	459	97	9549	36479	7	9	4	60	4	21	714	308	14	1	29	3214	29	325	120	6	9	453	80
169	Cochlearia scotica	1	BNr 112969	treatment_cold	3	31	87	37	51	58	83	444	135	11	8926	2677	8	13	43373	14353	91924	1350	23549	22656	12045	72291	871499	6	20	88	87	18	101	4625	162	39	6	322	19125	139	2838	294	9	14	1699	95
169	Cochlearia officinalis	1	BNr 112971	control_warm	3	41	55	14	9	12	7	39	4	1	231	1044	5	5	1441	244	3633	6	681	190	17	4866	12100	1	4	0	20	1	11	56	22	3	1	10	1376	3	156	46	2	2	87	18
169	Cochlearia scotica	1	BNr 112971	treatment_warm	3	38	36	12	6	107	22	109	6	1	588	1125	6	11	2103	322	2910	565	804	9533	4984	2645	355558	3	2	38	13	2	8	341	68	4	0	10	1241	10	181	44	2	3	167	47
193	Cochlearia bavarica	1	BNr 112733	control_warm	2	23	460	42	39	111	7	57	7	2	890	15	11	70	5426	593	6699	31	3147	904	81	4295	369	1	3	13	25	8	20	199	86	6	2	15	908	2	51	182	0	2	183	9
193	Cochlearia bavarica	1	BNr 112733	treatment_warm	2	32	582	78	39	317	40	189	7	3	1364	48	59	98	6785	805	14973	32	3854	1350	245	6336	940	6	8	30	57	20	36	291	192	14	1	19	3179	7	76	359	4	3	233	65
193	Cochlearia bavarica	1	BNr 112979	control_cold	2	26	130	8	9	23	1	10	1	0	74	4	1	17	613	95	861	8	904	185	20	1113	85	0	1	3	2	2	3	19	9	1	0	3	113	0	4	40	0	0	29	2
193	Cochlearia bavarica	1	BNr 112979	treatment_cold	2	24	731	271	105	1022	536	3810	85	20	26338	1381	19	48	52305	20266	133185	2371	78763	61101	35440	64664	1988166	16	19	180	256	16	107	3127	979	51	7	33	40295	43	1001	861	11	11	2448	123
193	Cochlearia bavarica	1	BNr 112980	control_cold	2	16	72	23	2	97	8	26	0	0	168	12	2	17	866	32	717	7	674	36	78	1264	62	1	3	0	2	2	5	51	38	1	0	1	997	1	7	60	0	1	54	16
193	Cochlearia bavarica	1	BNr 112980	treatment_cold	2	21	449	111	113	871	51	172	72	11	6854	895	12	27	14650	6634	51821	667	18855	5717	4315	27936	426784	8	14	89	189	18	71	1945	643	24	3	32	18612	44	536	617	8	8	2466	150
199	Cochlearia pyrenaica	1	Bnr 112868	control_cold	4	33	32	15	109	5	193	443	89	1	2689	189	58	48	724	2305	1596	165	149	386	464	1202	12233	3	22	107	74	7	46	2943	80	26	3	74	2951	27	732	62	10	2	1897	121
199	Cochlearia pyrenaica	1	Bnr 112868	treatment_cold	4	35	156	132	133	24	1018	3708	175	30	9118	1113	83	151	22730	8247	37106	1352	5298	10869	6597	38386	29613	19	55	308	166	22	133	11410	393	98	15	436	21045	225	4183	415	28	15	3149	203
199	Cochlearia pyrenaica	1	Bnr 112869	control_warm	4	32	118	48	113	18	454	659	143	2	3007	337	154	100	2024	5179	1382	262	399	691	634	1249	27726	19	52	221	102	9	74	3074	297	22	5	152	3109	46	1798	93	9	6	2007	402
199	Cochlearia pyrenaica	1	Bnr 112869	treatment_warm	4	33	120	82	223	20	487	680	211	4	6640	495	141	228	1990	4788	3305	261	362	718	698	2330	25711	20	47	284	142	13	104	6149	269	50	7	177	4495	94	2029	237	19	9	2910	357
199	Cochlearia pyrenaica	1	Bnr 112870	control_warm	4	33	185	86	313	32	272	774	178	5	6457	412	130	204	1215	6508	3985	164	555	885	945	2827	42192	17	55	454	123	7	164	10299	136	64	4	297	2699	137	1998	386	25	7	4551	389
199	Cochlearia pyrenaica	1	Bnr 112870	treatment_warm	4	32	74	3	76	8	200	1739	132	1	861	650	77	64	23448	1316	19795	91	6290	1120	187	22938	102095	17	37	71	35	21	88	3193	159	27	6	132	5113	124	785	336	5	1	1281	119
199	Cochlearia pyrenaica	1	Bnr 112871	control_cold	4	34	48	44	197	12	217	597	86	2	4433	136	77	79	1173	3049	1037	117	183	350	588	578	8762	14	28	111	62	6	64	3297	219	31	2	142	3068	37	1085	144	10	3	1410	85
199	Cochlearia pyrenaica	1	Bnr 112871	treatment_cold	4	46	157	65	40	14	545	591	123	26	1165	154	42	159	27117	2628	28867	160	4089	11824	3305	56439	137952	14	45	227	94	11	194	10863	643	77	6	413	20475	224	6710	543	18	28	1712	27
200	Cochlearia pyrenaica	1	BNr 112876	control_cold	4	27	177	6	15	1	17	71	63	13	231	291	13	59	8098	494	14396	48	3118	2705	963	20343	12936	7	25	40	46	3	88	2803	159	31	5	172	5536	118	2070	632	5	25	967	17
200	Cochlearia pyrenaica	1	BNr 112876	treatment_cold	4	38	411	151	126	68	580	4239	267	35	2742	660	41	46	53038	8683	107632	502	38960	15318	6532	91769	109731	21	59	646	270	42	209	18416	1567	91	8	421	22070	259	8733	634	31	19	2998	66
200	Cochlearia pyrenaica	1	BNr 112877	control_cold	4	27	764	17	44	6	57	206	170	34	1063	939	39	113	12370	3210	55444	142	11660	5150	2822	92015	35152	38	223	158	151	13	591	5996	326	83	9	357	19826	265	8039	1317	21	114	2656	39
200	Cochlearia pyrenaica	1	BNr 112877	treatment_cold	4	33	311	20	79	37	469	411	214	16	862	554	16	74	68635	3451	92578	417	28033	39519	10341	65356	104668	18	53	544	230	20	168	9171	1063	82	19	679	26693	296	4759	1135	19	28	2546	61
200	Cochlearia pyrenaica	1	BNr 112879	control_warm	4	37	434	15	38	4	36	190	146	43	839	865	55	100	13108	1588	15256	84	12083	6048	3122	78301	31007	40	109	122	111	11	392	7224	261	86	6	301	8179	313	5859	1053	7	39	1973	48
200	Cochlearia pyrenaica	1	BNr 112879	treatment_warm	4	37	203	5	25	2	18	61	68	10	346	228	14	45	7625	729	12688	45	3277	3915	1413	19692	12099	11	40	43	43	3	141	2883	124	52	5	176	5076	103	2440	515	5	26	1235	23
201	Cochlearia pyrenaica	1	BNr 112757	control_warm	4	42	872	83	26	716	109	200	12	7	2584	81	77	485	9340	741	29746	54	5911	387	337	11192	6682	4	8	36	104	42	62	918	166	49	2	29	1254	5	58	846	11	8	581	146
201	Cochlearia borzaeana	1	BNr 112757	treatment_warm	4	36	1025	434	175	1170	160	448	13	7	5851	174	293	638	25172	2175	42596	94	9586	2280	1080	34689	8220	19	26	108	170	57	120	1229	889	62	3	40	9110	19	362	1450	18	11	1127	203
201	Cochlearia pyrenaica	1	BNr 112760	control_warm	4	36	1590	1368	353	830	311	301	24	16	12409	579	309	866	45627	6813	77116	163	22950	2061	1460	46606	7499	34	26	114	678	33	225	932	1074	99	11	41	5405	23	589	1164	27	5	3205	506
201	Cochlearia borzaeana	1	BNr 112760	treatment_warm	4	27	3714	1380	499	3891	583	1083	39	18	16561	619	818	1702	50020	7787	84354	366	22980	6438	2210	85591	13731	34	63	333	672	126	456	2513	1680	200	14	124	28043	55	676	2609	35	16	3571	1008
201	Cochlearia pyrenaica	1	BNr 112761	control_cold	4	28	3686	844	144	4212	654	831	19	16	5188	344	302	1476	42447	4952	56241	121	19031	2943	1576	30887	12446	21	60	216	392	85	307	2422	1049	180	12	69	26117	33	665	2914	41	12	3835	361
201	Cochlearia borzaeana	1	BNr 112761	treatment_cold	4	28	2046	607	260	2602	1128	4463	26	10	25190	559	565	872	155872	14724	346088	1382	129723	56840	10579	202161	80873	23	49	278	405	62	226	1359	1304	106	11	210	37153	48	561	1871	23	13	1426	327
201	Cochlearia borzaeana	1	BNr 112762	control_cold	4	37	322	96	36	452	44	95	3	1	1433	40	48	154	3116	484	7320	24	2545	336	127	9056	1597	3	5	25	69	8	23	250	108	22	1	13	3140	4	61	210	3	2	374	51
201	Cochlearia borzaeana	1	BNr 112762	treatment_cold	4	34	1031	417	170	1305	1310	6258	165	28	10323	395	79	161	18327	10678	41767	991	12214	11149	10784	36767	80380	19	33	282	380	35	144	6791	1244	84	6	40	33466	121	1992	746	13	16	4955	264
203	Cochlearia alpina	1	BNr 112735	control_cold	4	20	155	30	35	16	266	579	29	3	4595	114	143	343	1126	450	4328	18	3816	859	366	33246	3307	18	57	37	7	35	33	1700	1084	28	1	55	1545	95	2562	251	17	1	6576	38
203	Cochlearia alpina	1	BNr 112735	treatment_cold	4	34	1871	373	235	710	489	1739	132	12	15994	627	130	276	44782	3828	178751	372	44311	20882	3178	114239	42049	31	68	159	125	68	183	8642	1370	139	5	126	23037	94	8450	1122	35	11	10429	206
203	Cochlearia alpina	1	BNr 112853	control_cold	4	44	197	49	38	3	90	136	21	1	1031	160	29	135	1884	222	5568	16	4095	843	185	6834	1324	10	18	7	6	7	14	501	171	17	0	22	661	36	2814	58	4	1	1727	12
203	Cochlearia alpina	1	BNr 112853	treatment_cold	4	33	889	261	165	363	1835	2463	44	5	11104	591	193	153	40467	4182	109453	236	39189	17292	6167	72760	33647	16	37	45	44	47	82	4623	565	55	4	135	22340	65	3519	439	11	6	6762	124
203	Cochlearia alpina	1	BNr 112854	control_warm	4	25	256	72	99	6	163	337	23	1	3291	176	126	79	3045	359	5226	23	1921	1228	283	13966	2138	10	22	23	6	19	30	2886	493	34	1	28	1209	69	4844	79	8	1	4654	51
203	Cochlearia alpina	1	BNr 112854	treatment_warm	4	33	857	164	142	18	340	576	59	2	2937	178	155	229	11238	809	16096	24	2166	2594	1334	13148	4388	16	32	18	10	22	93	4402	730	30	1	49	4659	56	3644	225	13	4	9122	32
203	Cochlearia alpina	1	BNr 112987	control_warm	4	39	148	60	33	5	72	238	22	1	1146	134	55	101	2226	211	4710	15	3207	855	377	15224	1064	9	16	8	5	7	12	774	177	13	1	24	868	31	4187	57	4	1	2962	18
203	Cochlearia alpina	1	BNr 112987	treatment_warm	4	37	708	129	115	14	472	387	47	4	3501	211	181	175	7332	731	16471	41	3598	1969	865	15249	4063	24	31	26	11	31	64	3634	652	46	1	53	7346	85	6019	206	9	3	6195	66
204	Cochlearia officinalis	1	BNr 112771	control_warm	1	32	1154	853	126	535	417	300	45	5	499	207	109	135	34380	776	27034	52	2738	1148	1724	26908	6406	5	172	3428	17	6	52	7680	391	44	4	130	3404	188	471	665	19	11	362	37
204	Cochlearia officinalis	1	BNr 112771	treatment_warm	1	38	1170	1253	128	608	416	471	49	4	666	263	85	99	24295	1737	42873	70	6109	2018	1474	35129	9733	7	130	2723	23	9	138	8850	426	63	5	184	4870	407	1560	1548	27	9	378	36
204	Cochlearia officinalis	1	BNr 112772	control_cold	1	38	2112	2261	232	1098	752	851	89	8	1203	476	155	179	43825	3135	77337	128	11022	3642	2661	63367	17557	14	236	4912	42	18	250	15965	769	115	11	333	8785	735	2816	2794	50	17	683	66
204	Cochlearia officinalis	1	BNr 112772	treatment_cold	1	35	1073	579	204	186	2384	6603	157	4	7855	1339	34	70	69395	9483	76220	635	34623	5331	4780	55697	38224	18	90	1151	147	23	149	8436	347	85	9	294	9498	157	2197	913	47	10	4243	323
204	Cochlearia officinalis	1	BNr 112775	control_cold	1	34	3310	214	362	65	1177	3441	542	9	15074	2368	213	538	8014	14774	5238	1081	1256	3684	3202	10499	10162	64	92	784	433	91	420	26959	1112	154	23	557	10603	162	12803	1543	81	27	21123	798
204	Cochlearia officinalis	1	BNr 112775	treatment_cold	1	38	1699	746	265	857	1796	5377	291	27	19116	1772	186	281	16537	20005	19781	2039	7051	7495	5762	22199	27434	29	73	375	217	23	208	17259	1112	63	33	612	30546	169	4529	1404	39	30	4583	276
204	Cochlearia officinalis	1	BNr 112777	control_warm	1	33	1483	1930	109	961	455	358	48	4	747	381	113	101	37968	2326	56375	57	6350	2130	1972	28641	7196	11	176	3893	37	12	138	5974	691	79	8	121	7204	615	1114	1311	24	8	328	31
204	Cochlearia officinalis	1	BNr 112777	treatment_warm	1	35	3339	283	669	65	1908	3761	751	17	27761	2124	359	783	12200	24710	10179	1045	1978	3465	4189	14210	10591	79	103	1269	559	101	466	22510	1200	225	22	497	13264	245	10948	1376	103	25	19761	1234
206	Cochlearia officinalis	1	BNr 112727	control_warm	1	44	17	82	135	1113	404	814	89	20	4682	212	100	116	15347	5609	34791	272	7617	3491	18318	27147	1010469	1	32	16	195	29	71	5099	34	49	3	132	16095	73	1674	501	18	28	2272	501
206	Cochlearia officinalis	1	BNr 112727	treatment_warm	1	37	9	72	59	616	176	511	49	10	3603	168	56	57	12086	2787	20965	126	4076	1557	13646	17001	932738	1	18	10	130	16	57	2338	15	41	2	67	7793	69	1236	384	9	17	1140	257
206	Cochlearia anglica	1	BNr 112882	control_cold	1	46	6	1	14	1	21	18	25	5	170	408	4	9	585	297	1710	21	515	60	205	1714	10101	0	2	29	3	2	5	215	27	3	1	25	766	13	185	15	1	1	107	6
206	Cochlearia officinalis	1	BNr 112882	treatment_cold	1	41	73	43	49	8	152	227	117	10	9621	1010	5	10	17922	10247	46846	881	15041	19855	7255	45157	227588	7	16	93	41	11	54	3244	225	43	6	276	15194	80	2538	192	8	9	753	68
206	Cochlearia anglica	1	BNr 112884	control_warm	1	32	84	14	123	9	291	203	266	39	1926	4058	30	73	4727	4128	18938	350	6093	790	2881	18436	89690	2	22	382	34	40	48	1760	343	36	11	249	12294	177	3148	136	17	5	1162	54
206	Cochlearia officinalis	1	BNr 112884	treatment_warm	1	23	108	17	157	11	374	261	341	50	2473	5211	39	93	6071	5301	24319	450	7825	1015	3699	23675	115178	3	28	491	44	51	61	2259	440	45	14	319	15788	226	4042	175	22	6	1492	70
206	Cochlearia anglica	1	BNr 112889	control_cold	1	52	11	58	95	714	157	576	75	14	4357	260	69	88	14284	3326	29195	104	5136	2275	17819	28018	1152899	1	27	11	207	13	51	3174	21	38	2	107	7973	72	1771	329	8	17	1535	397
206	Cochlearia officinalis	1	BNr 112889	treatment_cold	1	46	97	15	172	12	407	743	242	2	2896	106	11	25	10694	1248	19936	117	6990	2396	797	14299	288739	2	26	14	40	38	57	1196	473	45	10	182	25936	201	3163	140	13	4	1511	55
207	Cochlearia anglica	1	BNr 112825	control_cold	1	32	46	83	45	193	234	66	34	25	2915	154	16	98	17330	892	8450	71	6219	2869	71	22849	8433	7	17	158	41	8	74	2735	1276	13	0	144	5143	123	1383	354	6	7	556	32
207	Cochlearia anglica	1	BNr 112825	treatment_cold	1	25	275	401	134	366	1049	553	235	62	9820	549	52	186	177743	6532	270406	576	128901	63808	1373	168983	121010	23	51	585	96	18	291	15452	1999	100	10	597	44268	171	7289	1295	22	30	2328	265
207	Cochlearia anglica	1	BNr 112826	control_cold	1	22	37	47	51	92	74	49	24	8	2312	38	20	45	5628	457	22290	31	3320	1008	161	3874	6222	16	16	72	24	10	54	2769	786	8	1	102	4922	100	1124	40	2	6	211	98
207	Cochlearia anglica	1	BNr 112826	treatment_cold	1	26	148	251	178	349	371	251	183	90	12026	785	26	103	170569	5742	370370	643	105987	45054	1565	171242	307108	37	81	759	129	23	190	16899	2846	119	7	637	46110	248	8075	1145	20	28	1770	388
207	Cochlearia anglica	1	BNr 112828	control_warm	1	32	77	204	57	252	289	143	107	11	1114	209	31	519	33694	305	20125	79	32026	15342	352	32715	206395	31	38	326	79	16	104	2395	1111	110	9	323	14645	31	5678	1383	12	4	420	31
207	Cochlearia anglica	1	BNr 112828	treatment_warm	1	28	149	262	120	419	303	100	116	63	3650	183	83	315	54774	1445	71559	104	17991	10266	406	48275	387243	18	46	368	76	14	168	9065	866	86	4	343	15672	130	4665	563	23	15	1047	198
207	Cochlearia anglica	1	BNr 112829	control_warm	1	18	118	252	188	259	438	102	90	53	5444	208	76	223	33415	1717	60726	157	19148	7923	390	73174	17907	30	55	492	76	20	158	10929	2293	77	5	255	12428	192	4677	850	16	21	1157	245
207	Cochlearia anglica	1	BNr 112829	treatment_warm	1	27	107	228	170	235	397	92	81	47	4945	188	68	201	30353	1559	55163	142	17393	7197	353	66470	16266	27	49	446	69	17	143	9927	2083	69	4	231	11289	174	4248	771	14	18	1050	222
210	Cochlearia islandica	1	BNr 125632	control_cold	4	40	755	572	437	91	281	219	44	2	3660	118	93	88	4320	5088	4001	408	31340	3064	629	6015	472998	11	28	8	70	1	46	20182	1006	34	5	77	14212	95	1872	515	4	2	782	82
210	Cochlearia islandica	1	BNr 125632	treatment_cold	4	35	2295	862	296	787	1446	2346	45	43	10767	2603	83	132	95454	58409	112709	6428	65491	30354	12855	150771	1364014	50	74	68	372	33	129	22405	1794	72	33	568	69084	172	2955	1269	26	29	2700	448
210	Cochlearia islandica	1	BNr 125635	control_warm	4	25	2470	2120	1032	235	2126	1639	258	6	28024	397	443	384	13176	40986	20139	1138	104579	13564	2102	22739	2583641	66	108	31	236	11	229	100757	4031	138	51	553	93914	285	6327	2485	25	12	4379	200
210	Cochlearia islandica	1	BNr 125635	treatment_warm	4	36	3175	2919	65	541	418	615	29	36	141	16	51	110	91049	10839	116986	559	28197	16163	4284	108288	17841	47	61	52	443	98	339	14141	2025	122	13	238	20141	196	13319	1521	58	39	2357	566
210	Cochlearia islandica	1	BNr 125641	control_warm	4	41	3365	555	1288	550	742	847	130	6	567	569	173	200	10805	13167	10808	695	2361	4019	2474	13922	65878	24	51	15	274	7	124	39650	3214	75	39	332	31408	196	6967	2292	11	8	3695	151
210	Cochlearia islandica	1	BNr 125641	treatment_warm	4	41	3975	937	1182	602	962	774	92	6	751	434	150	358	13396	14914	12068	1242	2201	7127	3060	12570	55483	33	52	12	198	5	138	48666	2685	104	32	264	34012	300	7646	2249	11	5	3432	192
210	Cochlearia islandica	1	BNr 125643	control_cold	4	28	2260	469	747	373	669	338	46	3	356	323	123	264	5478	6801	6020	747	1878	6225	1337	6846	44261	13	37	9	148	2	123	22126	2162	75	16	203	18325	143	4031	837	6	4	1721	85
210	Cochlearia islandica	1	BNr 125643	treatment_cold	4	32	1313	1211	209	814	1199	2579	128	54	13326	1439	207	340	76249	33243	155558	4198	48659	15951	8148	84543	382508	23	109	96	451	39	162	16633	1174	50	10	323	41091	189	2056	790	23	27	1229	355
212	Cochlearia pyrenaica	1	BNr 112710	control_warm	1	34	520	167	40	22	211	322	67	12	326	130	119	228	2110	3024	63882	33	30821	2147	939	3942	22104	17	28	197	89	5	146	9745	614	77	2	243	6412	258	6992	302	19	7	1307	10
212	Cochlearia pyrenaica	1	BNr 112710	treatment_warm	1	27	1023	159	59	20	452	372	126	37	943	136	91	210	3889	1118	6038	54	1738	2977	1246	5176	28419	17	33	248	71	16	76	11641	460	46	4	188	10910	119	4574	360	17	11	4487	39
212	Cochlearia pyrenaica	1	BNr 112714	control_cold	1	14	1616	258	48	25	549	304	176	63	1216	91	135	150	2683	1056	9315	78	2972	3135	1950	5536	38352	20	32	369	109	26	126	15627	432	31	6	312	13242	188	6385	550	21	14	3455	49
212	Cochlearia pyrenaica	1	BNr 112714	treatment_cold	1	29	1223	404	224	360	1187	2522	95	34	15269	2112	94	184	42625	8815	130247	428	51645	33969	8681	95404	324662	24	74	256	104	53	151	15834	1129	119	11	568	57777	208	9661	640	26	13	9305	161
212	Cochlearia pyrenaica	1	BNr 112715	control_cold	1	20	539	127	47	22	192	616	89	36	489	334	229	323	5348	3023	122884	65	63286	2178	1923	7019	20960	39	27	247	117	8	162	16991	1515	57	2	306	8814	374	6459	258	19	14	2044	31
212	Cochlearia pyrenaica	1	BNr 112715	treatment_cold	1	22	1624	205	126	29	2068	6323	133	50	7054	713	162	273	18022	6614	50397	550	11809	32183	9828	48662	301506	29	65	317	158	39	209	27500	802	140	11	522	49047	291	9105	505	29	17	5326	54
212	Cochlearia pyrenaica	1	BNr 113047	control_warm	1	32	229	74	23	10	91	164	37	10	177	123	59	130	1874	1388	32160	32	20894	1091	590	1907	9443	11	14	105	38	4	72	6169	379	34	1	114	2725	126	3769	127	8	6	741	8
212	Cochlearia pyrenaica	1	BNr 113047	treatment_warm	1	26	564	110	29	11	188	201	74	19	368	135	89	194	2277	1587	63387	57	24905	2086	815	2878	21639	16	20	177	55	10	92	13001	559	56	3	239	4639	196	5229	214	15	10	1436	19
221	Cochlearia sessilifolia	1	BNr 113055	control_cold	4	37	1502	140	1011	1807	2256	1712	328	94	11554	581	425	363	7761	14820	10633	847	4080	4460	2287	13499	733081	70	204	1037	744	63	96	12665	1228	270	63	596	63405	231	1604	1761	77	74	14491	208
221	Cochlearia sessilifolia	1	BNr 113055	treatment_cold	4	49	1807	169	863	2889	8314	10159	466	91	56305	10371	283	521	65538	61706	181001	6737	61143	55929	31501	174863	1973407	49	178	1877	473	103	300	31602	4212	249	120	2078	242878	494	6356	1180	109	97	9283	286
221	Cochlearia sessilifolia	1	BNr 113071	control_warm	4	44	836	53	1666	1723	1464	731	278	41	6782	549	176	299	5615	14239	11613	819	1263	1544	3190	19673	376838	90	172	627	508	19	188	14759	1144	122	33	288	56708	650	3298	606	127	125	24688	229
221	Cochlearia sessilifolia	1	BNr 113071	treatment_warm	4	32	1186	64	515	1461	1508	1002	194	49	5124	487	194	253	6456	10764	8111	515	1890	2182	1434	11719	678129	51	99	669	390	31	78	12471	1186	150	33	373	31377	213	1147	863	45	39	8473	169
267	Cochlearia bavarica	1	BNr 112734	control_cold	2	24	919	39	2	214	12	184	25	1	749	22	23	62	8092	853	799	84	5856	906	218	2380	824	3	1	4	21	15	31	8	116	3	3	33	3150	4	34	105	0	2	146	20
267	Cochlearia bavarica	1	BNr 112734	treatment_cold	2	24	1234	292	144	1263	690	3121	243	6	11892	223	127	189	67791	5276	167937	360	72782	12596	1645	96275	1416255	12	25	81	165	38	113	659	694	31	6	92	25688	19	258	853	12	6	939	175
267	Cochlearia bavarica	1	BNr 113056	control_warm	2	19	1594	388	245	2451	112	493	16	6	4385	139	263	474	14684	3348	32516	146	11172	3546	1103	29130	1028532	31	52	214	304	29	135	647	1083	38	4	47	11433	22	467	876	20	10	798	357
267	Cochlearia bavarica	1	BNr 113056	treatment_warm	2	26	2909	694	427	3905	427	1215	38	15	12334	292	530	1262	43085	6191	82338	246	18260	11151	1670	78862	2661909	57	82	346	656	103	268	2474	1800	106	8	140	21492	57	690	1856	45	17	2806	635
267	Cochlearia bavarica	1	BNr 113057	control_cold	2	29	505	130	56	1086	38	144	184	4	2845	1353	68	440	7431	23710	26857	3650	2210	3145	4637	12371	1210308	8	12	63	105	11	59	1028	263	18	3	18	3784	11	123	460	2	4	245	95
267	Cochlearia bavarica	1	BNr 113058	control_warm	2	33	480	79	71	619	33	84	117	3	2062	1085	50	246	4229	15589	22841	1924	1775	1627	5584	8483	661556	9	12	45	111	15	51	720	149	22	2	14	2114	6	64	280	2	4	317	104
267	Cochlearia bavarica	1	BNr 113058	treatment_warm	2	29	351	60	50	307	31	83	122	2	1239	1084	39	121	4576	11899	11536	1141	1577	986	5721	4682	378558	5	9	22	69	11	26	360	167	17	1	10	2073	7	66	267	2	2	175	62
267	Cochlearia bavarica	1	BNr 113059	treatment_cold	2	27	1473	354	345	1924	578	1318	296	52	23208	2636	69	145	58876	28832	77734	2766	43263	31101	13828	68469	943531	22	62	422	324	28	186	6194	2260	117	15	53	64932	178	2827	1899	18	17	6765	259
269	Cochlearia danica	1	BNr 113060	control_cold	2	29	12	2	17	2	39	1605	26	5	314	345	3	6	455	1069	15290	232	159	4675	524	510	12303	7	5	32	6	4	9	94	56	4	1	24	2455	29	349	6	3	1	160	6
269	Cochlearia danica	1	BNr 113060	treatment_cold	2	35	72	40	54	9	1241	6628	98	15	10589	856	21	62	22420	18122	62193	2023	23921	20140	9112	43881	115632	12	22	144	51	9	100	5010	164	52	8	282	17193	90	2511	309	14	12	1277	84
269	Cochlearia danica	1	BNr 113063	control_warm	2	30	13	11	34	11	143	5349	37	18	639	2892	9	41	1839	4601	24758	668	126	6626	2718	3049	59076	13	9	35	8	5	7	177	263	20	2	133	11464	126	2054	9	16	1	378	9
269	Cochlearia danica	1	BNr 113063	treatment_warm	2	34	21	5	24	2	86	2569	77	1	552	528	5	24	1084	178	2235	10	273	255	126	2042	20691	0	6	3	12	7	20	281	122	8	3	48	5897	31	1124	31	6	1	293	12
269	Cochlearia danica	1	BNr 113065	control_warm	2	29	32	12	90	12	178	6326	62	29	819	3669	17	51	2076	6685	92040	825	304	23195	6989	5051	64527	37	11	83	20	20	31	427	403	26	3	176	21596	161	2836	43	17	1	929	22
269	Cochlearia danica	1	BNr 113065	treatment_warm	2	39	27	7	62	6	168	8134	113	24	850	1653	8	24	1453	9532	42077	607	452	11800	4877	2784	65477	19	11	155	25	14	26	602	190	11	3	117	10602	74	1422	68	9	1	526	20
269	Cochlearia danica	1	BNr 113067	control_cold	2	44	9	2	18	3	15	1003	24	5	271	1399	6	4	195	1316	15304	180	34	5852	917	1944	23353	8	4	20	5	7	11	122	134	3	0	37	2991	37	780	6	2	0	192	7
269	Cochlearia danica	1	BNr 113067	treatment_cold	2	36	200	101	194	26	483	13091	183	38	16956	2644	11	27	24157	15152	65462	958	13937	18642	7717	42118	105254	30	66	246	132	38	171	14931	586	138	17	605	46882	242	7838	656	23	29	4419	152
273	Cochlearia excelsa	2	BNr 113275	control_cold	3	23	339	40	84	31	256	1053	156	17	1661	391	39	99	25864	3687	31025	182	4669	3673	1344	25012	18238	22	18	511	469	38	84	13995	1540	61	5	153	11144	111	3585	1244	24	30	2548	58
273	Cochlearia excelsa	2	BNr 113275	treatment_cold	3	19	708	268	80	240	2273	5483	41	21	12969	1178	29	59	98109	8497	201039	898	238894	46387	13617	60057	1952241	12	28	177	103	33	111	8447	1073	59	5	239	60059	120	2265	388	10	10	2239	73
273	Cochlearia excelsa	2	BNr 113276	control_warm	3	24	351	7	48	3	24	107	74	16	525	235	18	73	10150	842	25148	68	5566	6109	2517	27085	21809	22	71	57	69	3	277	4798	223	59	6	248	5278	109	4577	635	5	45	1810	39
273	Cochlearia excelsa	2	BNr 113276	treatment_warm	3	28	365	56	53	219	36	75	128	2	1311	1163	49	101	3831	12639	7642	1160	1836	1319	5412	3742	423223	6	6	25	53	12	30	399	206	11	1	10	1425	6	73	293	3	2	177	45
273	Cochlearia excelsa	2	BNr 113278	control_cold	3	22	133	116	296	2023	1310	1698	296	64	18666	1642	250	532	22182	16075	49295	914	9712	16151	4387	27711	98858	4	64	2770	360	59	380	35509	7255	206	5	658	47421	750	12095	1168	147	34	5015	294
273	Cochlearia excelsa	2	BNr 113278	treatment_cold	3	24	4721	1580	1233	597	285	338	772	18	6717	799	20	53	68234	31562	134239	3118	55549	100192	16933	103644	710967	66	124	374	378	11	489	47628	4535	168	35	1452	60806	658	8175	2263	50	54	2518	362
Iabu	Ionopsidium abulense	2	BNr 113235	control_warm	5	24	1103	1017	162	1061	219	819	29	5	4604	260	107	113	11330	5839	20891	484	2734	2240	816	12055	11994	20	17	42	265	77	50	14402	1207	63	4	41	6773	171	208	460	26	29	1151	273
Iabu	Ionopsidium abulense	2	BNr 113235	treatment_warm	5	23	3577	2879	293	1040	334	873	49	8	7056	253	148	334	8707	12623	22499	667	78122	3154	1755	13044	244198	71	34	72	438	70	95	23863	1944	71	8	53	13110	231	489	673	26	72	4056	478
Iabu	Ionopsidium abulense	2	BNr 113237	control_cold	5	27	96	41	16	283	83	447	15	3	1772	3526	28	33	4920	1208	6763	1498	2229	24676	12826	9826	27587	8	9	127	47	6	23	1191	173	15	1	32	4480	23	577	119	6	7	483	179
Iabu	Ionopsidium abulense	2	BNr 113237	treatment_cold	5	26	351	169	205	239	539	1743	568	40	33146	12597	36	40	235305	75642	572467	5113	129162	97642	56261	378935	327531	32	102	422	497	92	439	21058	873	125	24	1418	96640	582	15764	1511	42	72	9794	364
Iabu	Ionopsidium abulense	2	BNr 113238	control_cold	5	23	91	125	217	2038	757	1789	287	53	18921	1158	441	435	21050	11176	29685	856	7594	15907	3099	26547	60088	5	68	1914	421	71	266	19893	6099	240	6	1229	37852	517	7669	1180	88	33	5798	174
Iabu	Ionopsidium abulense	2	BNr 113238	treatment_cold	5	30	68	75	89	958	1370	5382	167	24	16814	3207	98	267	56741	18099	71339	1052	12193	20033	5304	34777	612297	2	23	1140	238	63	257	12290	1958	128	6	809	57574	283	5140	389	37	15	3826	200
Iabu	Ionopsidium abulense	2	BNr 113240	control_warm	5	26	1582	1392	119	673	162	555	28	9	4143	336	188	174	10068	7922	21404	397	3055	2086	782	13612	12028	15	25	59	313	72	81	14844	1561	55	5	67	8108	255	291	477	25	32	1811	303
Iabu	Ionopsidium abulense	2	BNr 113240	treatment_warm	5	25	2379	2914	338	912	419	786	47	7	10682	444	212	398	13723	21167	26063	713	107935	5946	1630	22369	819551	89	47	93	464	122	82	26231	2119	77	8	76	12293	273	458	1049	42	64	5973	415
Iabu	Ionopsidium abulense	2	BNr 113241	control_cold	5	29	4055	1231	1060	718	932	778	111	8	628	399	113	316	15558	18223	9490	1336	3092	9424	2374	18586	55527	37	53	10	293	4	106	45194	2521	110	42	363	42338	403	8396	1757	13	6	4044	156
Iabu	Ionopsidium abulense	2	BNr 113241	treatment_cold	5	24	1696	1340	343	1396	1848	4133	135	64	17925	1967	297	411	108676	50109	244422	5160	83648	29238	13386	113372	556553	44	158	103	867	56	220	28753	1564	68	18	537	44316	293	2284	1390	39	38	1578	369
Iabu	Ionopsidium abulense	2	BNr 113242	control_warm	5	25	4888	4535	54	1374	558	1038	55	33	188	25	84	329	106423	24153	146279	785	50098	32031	8422	171652	40481	105	84	54	628	120	381	27058	5057	211	9	362	14420	188	17785	3323	82	43	3966	489
Iabu	Ionopsidium abulense	2	BNr 113242	treatment_warm	5	25	1728	1588	35	294	227	335	16	19	76	9	28	60	49539	5897	63651	304	15342	8794	2331	58918	9707	26	33	28	241	54	184	7694	1102	66	7	129	10958	107	7247	827	32	21	1282	308
Iabu	Ionopsidium abulense	2	BNr 113243	control_warm	5	24	103	85	140	1253	2884	8436	261	41	25526	6429	135	293	63334	30956	92812	1834	20579	39707	7372	73792	991729	4	45	1960	522	87	344	15535	4164	199	7	984	79368	489	11470	539	55	17	6064	394
Iabu	Ionopsidium abulense	2	BNr 113243	treatment_warm	5	24	245	290	100	3073	683	1995	74	22	4685	253	86	103	18151	7498	49206	187	9110	4128	17956	35842	2705609	1	67	12	360	45	252	3415	39	104	7	198	25365	120	3175	1537	28	54	3727	1351
Iabu	Ionopsidium abulense	2	BNr 113244	control_cold	5	24	1620	1381	131	659	653	648	45	5	574	278	140	95	35348	1945	63168	60	7067	2287	1968	37932	7889	7	149	3093	25	12	214	10220	607	63	6	158	4401	551	1857	1558	38	10	498	32
Iabu	Ionopsidium abulense	2	BNr 113244	treatment_cold	5	25	764	728	204	167	2819	5995	130	3	8145	1378	29	84	85255	9508	95580	650	28874	5329	4570	37684	32828	21	103	1122	143	21	162	8776	353	61	7	394	10566	113	2224	1066	45	7	2788	394
Iacau	Ionopsidium acaule	2	BNr 113222	control_cold	5	23	7306	5689	674	2575	669	1872	153	24	23299	863	1030	1242	26799	50493	98002	2840	13315	13037	4240	51741	64896	38	73	221	1194	197	614	32201	4171	235	14	411	35882	440	1531	2685	96	174	3320	1110
Iacau	Ionopsidium acaule	2	BNr 113222	treatment_cold	5	26	6012	3332	262	1488	1249	6804	108	9	38483	1868	249	296	48208	90962	106394	7093	56038	21650	8977	103122	362834	1	53	177	650	196	200	35336	2269	108	16	188	36161	322	524	1176	45	127	581	455
Iacau	Ionopsidium acaule	2	BNr 113223	control_warm	5	27	286	3275	283	959	1348	1361	266	139	1693	1252	329	796	15867	17054	47462	1037	12252	4077	2847	49525	153326	107	190	241	655	29	458	17483	1396	151	11	643	25242	394	11060	2361	78	43	4930	1164
Iacau	Ionopsidium acaule	2	BNr 113223	treatment_warm	5	22	541	5754	481	1732	1463	2822	294	298	2476	2025	761	928	25543	27439	63440	1310	19434	4177	3976	129090	186979	95	304	260	977	29	512	30311	2067	189	23	854	36451	558	17629	2852	102	52	6084	1776
Iacau	Ionopsidium acaule	2	BNr 113226	control_cold	5	26	45	127	164	715	494	644	207	44	7679	1265	364	276	21955	5263	46901	467	5047	11722	3301	16789	1593097	5	34	2025	400	77	283	22954	4413	136	3	439	21645	811	3320	815	89	19	4983	243
Iacau	Ionopsidium acaule	2	BNr 113226	treatment_cold	5	28	1111	536	129	402	3995	9711	61	24	20352	1870	33	73	179172	13665	364693	1095	344568	73036	15710	90546	1989912	21	35	291	136	36	140	16190	1530	97	7	445	109762	198	2799	709	10	12	3362	93
Iacau	Ionopsidium acaule	2	BNr 113227	control_warm	5	25	420	9	58	4	32	115	84	24	474	251	21	62	10353	901	21932	77	6274	6360	3264	39728	20980	33	66	58	90	3	248	3596	298	72	6	317	7558	89	4453	787	5	51	2231	60
Iacau	Ionopsidium acaule	2	BNr 113227	treatment_warm	5	25	578	63	65	425	36	97	200	2	1378	1866	77	157	5239	18720	13499	1206	1914	2462	7677	6019	658156	9	10	40	53	13	56	710	299	13	1	15	1921	9	125	367	5	2	176	88
Iacau	Ionopsidium acaule	2	BNr 113228	control_cold	5	28	1651	769	264	196	405	8818	268	4	15069	1889	35	90	85812	21972	141234	1368	44641	6039	6676	61448	50167	20	128	1688	300	33	166	11186	371	99	12	319	10131	217	2351	1197	63	14	4798	38
Iacau	Ionopsidium acaule	2	BNr 113228	treatment_cold	5	27	1512	2364	38	199	4245	6491	35	11	387	254	36	40	157710	28261	510342	2082	165560	60557	11154	233892	113952	18	95	471	270	25	181	4543	987	78	13	175	27265	142	3323	1324	20	29	1454	183
Igla	Ionopsidium glastifolium	2	BNr 113252	control_cold	5	21	5283	1647	852	2585	2080	5420	332	106	11321	1283	303	833	7280	29871	11852	1516	4207	2318	3295	14258	6095	134	298	405	612	17	553	56247	4323	5	69	353	84715	594	18442	4601	26	85	5566	357
Igla	Ionopsidium glastifolium	2	BNr 113252	treatment_cold	5	28	1967	610	278	667	1237	6962	245	62	21390	1411	57	159	116218	25650	189753	2129	177899	35272	3249	152916	522987	76	91	955	346	13	343	28847	4232	85	23	654	94758	253	7656	1522	35	52	2522	312
Igla	Ionopsidium glastifolium	2	BNr 113253	control_warm	5	25	4544	495	549	125	2391	2821	559	11	26672	2684	549	1273	15746	24629	8747	847	1690	4047	2441	19783	12044	64	178	1351	926	57	361	25188	1388	181	23	539	12194	371	14125	928	165	36	25771	1307
Igla	Ionopsidium glastifolium	2	BNr 113253	treatment_warm	5	31	2511	1124	374	3243	984	3263	185	67	6334	960	146	553	4228	19878	8002	894	1968	2419	2187	8453	3787	86	141	239	277	11	445	22987	1868	2	35	276	28843	289	20330	2282	11	43	2570	205
Igla	Ionopsidium glastifolium	2	BNr 113254	control_cold	5	26	255	763	260	595	552	125	198	92	7327	477	192	520	75347	5643	159636	240	28322	18995	669	116018	20846	36	113	967	184	38	448	9570	4630	179	13	534	21579	206	11347	945	35	34	2418	472
Igla	Ionopsidium glastifolium	2	BNr 113254	treatment_cold	5	31	218	403	154	501	1241	296	206	103	16093	910	85	210	259191	14975	279272	1039	222952	80938	2013	398655	190832	41	75	686	91	39	258	21175	3247	76	12	640	51377	302	7056	1687	34	26	1815	415
Igla	Ionopsidium glastifolium	2	BNr 113256	control_warm	5	22	134	275	116	214	199	57	117	33	4848	229	68	232	29885	2630	58795	152	12609	7381	319	43200	9365	13	55	470	70	18	171	4261	1705	68	6	197	7948	96	4179	425	16	16	920	176
Igla	Ionopsidium glastifolium	2	BNr 113256	treatment_warm	5	28	76	20	11	327	33	185	7	2	1034	2237	10	28	2668	428	6628	911	923	15529	5387	5001	414289	5	4	51	43	5	15	638	122	8	0	18	3093	15	309	86	2	4	329	92
Igla	Ionopsidium glastifolium	2	BNr 113270	control_cold	5	23	67	117	217	1063	525	599	301	38	8880	1121	304	258	16430	7506	36849	683	5281	9505	2803	19699	1595313	4	50	1957	330	65	236	23976	3286	178	5	405	17489	693	4365	803	74	16	4252	272
Igla	Ionopsidium glastifolium	2	BNr 113270	treatment_cold	5	25	3368	1451	330	1307	1590	4573	59	88	13004	3965	183	161	153854	76112	152440	8705	101553	53467	16635	299842	1981505	88	84	92	484	52	203	24166	2214	141	47	809	97218	200	6274	1665	28	47	4223	519
Igla	Ionopsidium glastifolium	2	BNr 113271	control_warm	5	23	76	303	182	3643	386	373	209	30	19386	3037	32	85	190301	24022	346568	1347	146455	31298	8119	173724	578530	12	53	213	479	55	410	22004	990	179	14	372	119845	361	7086	1189	46	82	4081	187
Igla	Ionopsidium glastifolium	2	BNr 113271	treatment_warm	5	24	5795	4117	490	1535	318	1706	72	21	14346	492	253	517	16249	30161	29700	1430	183284	4835	2909	24275	1048664	130	74	119	561	145	218	35861	2362	114	15	128	17723	290	720	1137	50	107	5253	969
Igla	Ionopsidium glastifolium	2	BNr 113272	control_cold	5	28	218	590	312	382	513	139	208	108	5728	423	185	744	48446	5392	95147	282	19970	10257	757	115417	22894	38	114	1062	210	27	512	14942	4203	222	8	743	21550	232	12667	1491	34	43	1692	716
Igla	Ionopsidium glastifolium	2	BNr 113272	treatment_warm	5	29	79	254	130	193	555	109	79	63	4601	144	55	267	26304	1306	40821	133	19377	9260	374	76218	17882	29	62	579	49	20	190	12665	2180	67	4	250	11578	200	4546	986	18	13	1211	197
Igla	Ionopsidium glastifolium	2	BNr 113274	treatment_cold	5	33	85	44	38	10	127	176	148	6	14343	863	5	10	8433	2387	10396	134	7772	900	408	21473	602058	4	4	2	23	3	12	487	171	8	1	16	1655	17	205	45	2	4	130	25
Imega	Ionopsidium megalosperma	2	BNr 113279	control_cold	5	28	68	91	190	517	297	543	320	50	5344	898	236	251	11871	4786	24086	422	4643	6021	2748	16571	939351	6	44	1010	415	58	212	12826	3606	209	5	395	11432	326	3624	739	31	15	3816	155
Imega	Ionopsidium megalosperma	2	BNr 113279	treatment_cold	5	23	395	238	113	1496	1002	1853	294	68	26452	3672	156	250	89510	28956	251045	1826	37435	76467	25761	103069	1376656	33	145	1275	401	45	343	16583	5978	158	22	1840	110582	613	7965	1586	69	40	3649	324
Imega	Ionopsidium megalosperma	2	BNr 113284	control_cold	5	29	1099	54	820	1908	1445	863	282	33	4219	503	197	341	13214	6749	7320	905	2156	3374	2298	22787	368564	72	150	759	805	19	108	15766	2145	128	33	464	29424	305	2266	691	45	97	12406	246
Imega	Ionopsidium megalosperma	2	BNr 113284	treatment_cold	5	28	72	165	213	1714	3626	8241	402	34	34820	5002	169	405	93347	21134	112141	2191	28140	38320	9785	47393	704282	4	50	1717	207	68	331	25807	3507	239	11	1180	74523	349	8510	859	58	18	6128	169
Ipro	Ionopsidium prolongoi	2	BNr 113257	control_cold	5	24	217	324	279	368	516	138	257	75	6856	400	107	640	67129	2793	50777	204	20324	14555	410	161459	32230	19	59	662	203	28	270	11138	2713	140	9	575	18175	331	6877	1309	33	42	3144	271
Ipro	Ionopsidium prolongoi	2	BNr 113257	treatment_cold	5	29	277	729	254	282	1242	447	340	148	17591	437	41	216	205800	7227	287283	513	113002	51117	971	383823	98753	30	64	577	195	29	276	25669	5447	193	8	1033	33331	437	12521	1269	37	57	4229	404
Ipro	Ionopsidium prolongoi	2	BNr 113260	control_cold	5	27	273	233	137	208	891	128	127	118	5117	224	161	280	50711	5112	148041	182	28768	17368	19418	117908	976287	33	71	649	112	34	431	15137	2258	112	10	723	19424	361	12279	647	23	20	980	233
Ipro	Ionopsidium prolongoi	2	BNr 113260	treatment_cold	5	25	46	425	403	1756	2807	5708	191	58	32501	1270	170	138	164949	43351	269945	2166	144663	23571	14030	214427	276091	4	89	57	453	122	339	12219	156	194	13	312	56246	550	12086	1368	42	124	4772	842
Ipro	Ionopsidium prolongoi	2	BNr 113261	control_cold	5	24	206	140	53	526	271	787	42	11	3215	14998	58	77	15870	3289	26159	165	6754	2383	584	16252	3889155	14	15	17	213	12	68	2861	616	50	3	65	11402	100	2177	505	18	21	1115	220
Ipro	Ionopsidium prolongoi	2	BNr 113261	treatment_cold	5	25	87	77	51	66	169	758	195	18	9551	4753	14	24	70845	19540	144518	1488	43504	42827	19166	74881	1444787	7	25	152	159	26	190	8555	182	61	7	455	37435	207	5884	504	16	20	2246	122
Ipro	Ionopsidium prolongoi	2	BNr 113262	control_warm	5	20	235	176	67	701	469	1567	61	26	5584	19786	107	141	26090	3956	48080	260	8831	3635	824	25208	7971299	17	28	27	433	20	129	4378	1020	65	4	86	21438	148	4616	1038	28	40	1706	497
Ipro	Ionopsidium prolongoi	2	BNr 113262	treatment_warm	5	27	69	23	8	244	31	189	9	1	925	1862	9	20	3197	533	6242	1005	986	16142	5886	4467	480157	5	4	54	29	5	17	680	94	6	0	13	2683	14	348	68	2	4	361	68
Ipro	Ionopsidium prolongoi	2	BNr 113264	control_cold	5	25	12	127	77	661	299	881	49	19	3494	288	55	63	16869	4672	30601	171	4192	1958	14328	24148	1338538	1	27	16	180	18	70	3578	29	53	3	124	11317	108	1477	409	11	23	1352	412
Ipro	Ionopsidium prolongoi	2	BNr 113264	treatment_cold	5	24	108	89	73	10	297	452	136	21	10768	2001	5	12	28875	19826	78925	1380	17856	28821	8793	74037	376992	11	28	174	65	14	77	5731	482	64	9	588	25471	145	3501	236	11	14	1031	125
Ipro	Ionopsidium prolongoi	2	BNr 113266	control_warm	5	18	19	192	79	1545	393	1254	67	23	5433	240	85	91	16522	5470	48018	172	9930	3976	20773	41980	2054445	1	42	15	267	28	132	3350	42	73	5	171	20095	109	2159	924	19	36	2319	650
Ipro	Ionopsidium prolongoi	2	BNr 113266	treatment_warm	5	26	242	195	91	1641	353	1407	69	15	4034	199	85	103	10247	4506	34659	162	8241	3626	12701	37338	2290277	1	45	11	294	31	153	3426	33	85	4	181	20871	87	2332	971	21	33	2439	720
Ipro	Ionopsidium prolongoi	2	BNr 113267	control_cold	5	28	15	73	81	1016	249	644	65	15	3820	272	81	84	22542	3595	36900	176	7430	2878	13734	18836	1108524	1	18	13	257	23	68	3921	19	64	2	84	8103	73	1647	600	14	21	1707	404
Ipro	Ionopsidium prolongoi	2	BNr 113267	treatment_cold	5	20	122	110	138	17	251	626	294	23	17606	2870	14	17	31860	17143	105503	1427	24995	35977	20760	85244	359901	20	29	151	80	29	161	5595	606	108	15	644	45116	146	7034	521	20	22	2341	142
Ipro	Ionopsidium prolongoi	2	BNr 113268	control_cold	5	24	1154	73	493	2108	2002	1572	281	86	7580	700	316	359	8225	14556	11534	570	2894	3407	2336	20697	692075	69	101	851	696	36	136	15178	1546	150	32	617	48022	229	1813	1046	50	54	13614	234
Ipro	Ionopsidium prolongoi	2	BNr 113268	treatment_cold	5	25	3284	232	1876	5243	23740	18881	832	141	82619	20213	655	1069	115725	83899	393297	11741	150984	88396	70873	320909	3075955	110	240	3590	1071	196	502	76053	6784	495	207	5382	533348	1182	8784	2347	203	239	17252	417
