# Supplementary material for: Evolutionary footprints of a cold relic in a rapidly warming world
Source: eLife. 2021 Dec 21;10:e71572. doi: 10.7554/eLife.71572 (PMC8741218; doi:10.7554/eLife.71572)
Supplement: Supplementary file 15. — Respective 2C-values for Raphanus sativus, Solanum lycopersicum L. cv. ‘Stupické polní rané’ and Glycine max (L.) MERR. cv. ‘ Polanka’ as given in Dolezel et al., 2007. [file elife-71572-supp15.xlsx]

## Sheet: Tabelle1
Supplementary File 15: Standard plants used for flow cytometric analyses. Respective 2C-values for Raphanus sativus, Solanum lycopersicum L. cv. “Stupické polní rané” and Glycine max (L.) MERR. cv. “Polanka” as given in Doležel et al. (2007).
Standard plant	2C-value
Raphanus sativus L. cv ”Saxa”	1.11 pg
Solanum lycopersicum L. cv. “Stupické polní rané”	1.96 pg
Glycine max (L.) MERR. cv. “Polanka”	2.50 pg
Glycine max (L.) MERR. (cultivar unknown)	2.46 pg
Atropa belladonna L. (Botanical Garden Heidelberg)	3.95 pg
