# Supplementary material for: Evolutionary footprints of a cold relic in a rapidly warming world
Source: eLife. 2021 Dec 21;10:e71572. doi: 10.7554/eLife.71572 (PMC8741218; doi:10.7554/eLife.71572)
Supplement: Supplementary file 16. [file elife-71572-supp16.xlsx]

## Sheet: Tabelle1
pop.-no.	B-Nr.	B-####-####	pres. spec.	expected ploidy	exp. nchr. o acc. Species	Labi-ID	Date of Run	Filename	Peak ID	Mean X	Count	fraction %	Cvx-value	Mean X Standard	Count of Std.	fraction % of standard	Cvx-value of Std.	Which Std.	Std.-correction-factor	2C value adapted	average 2C/ind.	1Cx-value adapted	sample size	average 1C/ind.
1	HEID112955	B-2011-0412	pyrenaica	2	12	Cpyr_1307	2014-06-13	02-Cpyr_1307	RN1	48.05	1902	15.52	9.99	144.46	4197	34.24	8.63	G. max Polanka	0.938337	0.78027		0.390135	1
1	HEID112956	B-2011-0412	pyrenaica	2	12	Cpyr_1308	2014-08-29	05_Cpyr1308_0p6Speed_14000CtG	RN1	58.58	1541	13.69	5.32	177.23	2010	17.85	4.93	G. max Polanka	0.938337	0.775374		0.387687	1
1	HEID112957	B-2011-0412	pyrenaica	2	12	Cpyr_1309	2014-08-29	06_Cpyr1309_0p6Speed_8881CtG	RN1	62.3	1007	12.85	5.61	182.08	1193	15.22	4.52	G. max Polanka	0.938337	0.802647		0.401324	1
1	HEID112959	B-2011-0412	pyrenaica	2	12	Cpyr_1421	2014-08-14	04_Cpyr1421jung_0p5Speed_ct7525G	RN1	54.11	758	10.95	5.93	158.99	934	13.49	4.39	G. max Polanka	0.938337	0.798374		0.399187
1	HEID112959	B-2011-0412	pyrenaica	2	12	Cpyr_1421	2014-08-14	05_Cpyr1421alt_0p5Speed_ct8905G	RN1	55.4	680	8.56	5.27	161.03	498	6.27	4.62	G. max Polanka	0.938337	0.807053	0.802714	0.403526	2
1	Heid112962	B-2011-0412	pyrenaica	2	12	Cpyr_1425	2014-09-05	02_Cpyr1425_Raph_11081CtG	RN1	90.68	655	7.76	6.54	121.06	2317	27.44	6.01	R. sativus	0.987014	0.820648		0.410324
1	Heid112962	B-2011-0412	pyrenaica	2	12	Cpyr_1425	2014-09-05	07_Cpyr1425_Solan_12000CtG	RN1	66.9	1368	15.06	10.76	165.78	1655	18.22	4.53	S. lycopersicum	1	0.790952	0.8058	0.395476	2	0.4029
10	HEID112859	B-2011-0358	C. alpina	4	24	Calp_1415	2014-10-16	07_Calp1415_0p6Speed_15000Ct	1	129.65	3093	27.6	5.57	176.82	2407	21.48	4.91	G. max Polanka	0.938337	1.72005		0.430011	1
10	HEID112863	B-2011-0359	C. alpina	4	24	Calp_1419	2014-09-05	03_Calp1419_Raph_12000CtG	RN2	184.72	2954	30.98	5.74	123.33	2708	28.4	5.75	R. sativus	0.987014	1.64093		0.410234
10	HEID112863	B-2011-0360	C. alpina	4	24	Calp_1419	2014-09-05	08_Calp1419_Solan_12000Ct	1	132.1	2582	29.72	6.5	166.56	2298	26.45	4.7	S. lycopersicum	1	1.55449	1.59771	0.388623	2	0.399428
10	HEID112864	B-2011-0358	C. alpina	4	24	Calp_1312	2014-08-29	08_Calp1312_0p6Speed_19000CtG	RN1	137.01	4990	33.18	4.48	187.71	3270	21.74	4.92	G. max Polanka	0.938337	1.71224		0.428059	1
10	HEID112986	B-2011-0358	C. alpina	4	24	Calp_1311	2014-08-29	09_Calp1311_0p6Speed_15831Ct	1	127.25	4326	35.71	4.09	181.47	2925	24.15	4.91	G. max Polanka	0.938337	1.64495		0.411237
10	HEID112986	B-2011-0358	C. alpina	4	24	Calp_1311	2014-10-30	04_Calp1311_0p5Speed_12000CtG	RN1	125.95	1818	17.92	4.46	159.65	2894	28.53	4.84	G. max Polanka	0.938337	1.85067	1.74781	0.462667	2	0.436952
21	HEID106724-2	B-2005-1048	C. macrorrrhiza	2	12	Cmac_0291b	2016-03-24	05_Glycine+HEID106724-2.fcs	RN1	52.63	5447	15.28	5.85	166.67	8417	23.61	4.21	G. max Polanka	0.938337	0.740755		0.370378
21	HEID106724-2	B-2005-1048	C. macrorrrhiza	2	12	Cmac_0291b	2016-03-15	08_Glycine+HEID106724-2.fcs	RN1	55.43	2240	10.93	6.56	176.4	5418	26.45	5	G. max Polanka	0.938337	0.737132	0.738944	0.368566	2	0.369472
21	HEID109699-1	n/a	C. macrorrrhiza	2	12	Cmac_1695a	2016-03-30	02_HEID109699-1.fcs	RN1	62.89	13504	33.76	5.61	194.12	4710	11.78	3.2	G. max Polanka	0.938337	0.759994		0.379997
21	HEID109699-1	n/a	C. macrorrrhiza	2	12	Cmac_1695a	2016-03-15	07_Glycine+HEID109699-1.fcs	RN1	54.26	2335	11.31	8.16	174.31	6719	32.55	5.75	G. max Polanka	0.938337	0.730225	0.745109	0.365112	2	0.372555
139	HEID112995	B-2006-0480	borzeana	8	48	Cbor_1657	2015-07-13	10_Atropa_B-2006-0480_HEID112995_455Gain_22307G	RN1	128.22	6658	34.33	7.25	181.5	5312	27.39	7.27	A. belladonna	0.938337	2.61541		0.326926
139	HEID112995	B-2006-0480	borzeana	8	48	Cbor_1657	2015-07-16	04_Atropa+B-2006-0480_HEID112995_39589CtG	RN1	136.05	8328	25.49	7.38	192.57	13366	40.91	7.01	A. belladonna	0.938337	2.6156		0.326949
139	HEID112995	B-2006-0480	borzeana	8	48	Cbor_1657	2015-07-17	07_Atropa+B-2006-0480_HEID112995_36612CtG	RN1	128.65	6320	19.18	8.17	183.5	16102	48.86	7.38	A. belladonna	0.938337	2.59558	2.60886	0.324448	3	0.326108
140	HEID106723-5	B-2009-0175-5	borzeana	8	48	Cbor_1015e	2015-07-16	09_Solanum+B-2009-0175-5_HEID106723-5G	RN2	241.31	5717	28.18	6.8	150.23	6647	32.76	7.28	S. lycopersicum	1	3.14829		0.393536
140	HEID106723-5	B-2009-0175-5	borzeana	8	48	Cbor_1015e	2015-07-17	03_Solanum+B-2009-0175-5_HEID106723-5_20775CtG	RN2	201.65	4504	24.43	8.47	131.02	9350	50.72	8.56	S. lycopersicum	1	3.01659		0.377074
140	HEID106723-5	B-2009-0175-5	borzeana	8	48	Cbor_1015e	2015-07-21	03_Solanum+B-2009-0175-5_HEID106723-5_17854ctG	RN2	281.59	8596	54.27	10.75	177.04	3355	21.18	11.25	S. lycopersicum	1	3.11747	3.09412	0.389683	3	0.386765
145	HEID112992	B-2006-0476	tatrae	6	42	Ctat_1654	2015-07-17	06_Atropa+B-2006-0476_HEID112992G	RN1	99.75	3626	18.35	8.75	174.06	10790	54.6	8.85	A. belladonna	0.938337	2.12165		0.353609
145	HEID112992	B-2006-0476	tatrae	6	42	Ctat_1654	2015-07-20	03_Atropa+B-2006-0476_HEID112992_19287ctG	RN1	95.1	2930	16.23	9.83	168.61	9370	51.91	9.87	A. belladonna	0.938337	2.08813		0.348022
145	HEID112992	B-2006-0476	tatrae	6	42	Ctat_1654	2015-07-22	02_Atropa+B-2006-0476_HEID112992_37370ctG	RN1	118.43	11320	32.18	6.67	210.17	13912	39.55	6.55	A. belladonna	0.938337	2.08618	2.09866	0.347697	3	0.349776
148	HEID113039	B-2012-0543	C. pyrenaica	2	24	Calp_1322	2014-06-20	04_Calp_1322G	RN1	52.96	1487	11.48	7.37	148.67	4303	33.21	6.71	G. max Polanka	0.938337	0.835648		0.417824
148	HEID113039	B-2012-0543	C. pyrenaica	2	24	Calp_1322	2014-06-26	04_Zea_1x_1322_Calp_Speed03_Gain480,FCS	RN1	56.25	797	13.99	8.07	373.88	983	17.26	5.71	Z. mays	1.02	0.833279	0.834464	0.416639	2	0.417232
148	HEID113042	B-2012-0543	C. pyrenaica	2	24	Calp_1402	2014-08-28	06_Calp1402_0p6Speed_9303CtG	RN1	59.04	670	8.46	7.97	161.42	1895	23.94	4.84	G. max Polanka	0.938337	0.858001		0.429001	1
150	HEID112846	B-2012-0545	officinalis	4	24	Coff_1385	2015-07-06	02_112846_stdGmax_15928CtG	RN1	125.26	2957	24.07	7.05	184.1	3355	27.31	7.18	G. max Polanka	0.938337	1.59609		0.399023
150	HEID112846	B-2012-0545	officinalis	4	24	Coff_1385	2015-07-13	07_B-2012-0545_HEID112846+GmaxPolanka_20073ctG	RN1	117.67	5457	31.26	7.92	171.48	3714	21.28	7.96	G. max Polanka	0.938337	1.60972		0.402431
150	HEID112846	B-2012-0545	officinalis	4	24	Coff_1385	2015-07-15	04_B-2012-0545_HEID112846+GmaxPolanka_18432ctG	RN1	116.42	3754	23.78	7.58	169.55	4636	29.36	7.76	G. max Polanka	0.938337	1.61075	1.60552	0.402688	3	0.40138
151	HEID112817	B-2012-0546	officinalis	4	24	Coff_1606	2015-07-02	03_Cochlearia_HEID112817G	RN1	132.26	4721	32.5	8.8	202.85	3803	26.18	7.49	G. max FL	0.938337	1.50643		0.376608
151	HEID112817	B-2012-0546	officinalis	4	24	Coff_1606	2015-07-06	05_112817_stdGmax_12127ctG	RN1	112.47	2712	26.86	7.41	174.15	2588	25.63	6.56	G. max Polanka	0.938337	1.505		0.37875
151	HEID112817	B-2012-0546	C. officinalis	4	24	Coff_1606	2016-03-31	02_Glycine+HEID112817.fcs	RN1	131.08	9085	38.14	4.58	206.43	3872	16.26	4.42	G. max Polanka	0.938337	1.48958		0.372394
151	HEID112817	B-2012-0546	C. officinalis	4	24	Coff_1606	2016-04-01	02_Glycine+HEID112817.fcs	RN1	133.07	4627	21.2	4.32	208.19	8325	38.14	4.09	G. max Polanka	0.938337	1.49941	1.5001	0.374851	4	0.375651
151	HEID112824	B-2012-0546	officinalis	4	24	Coff1612	2015-07-01	07_Cochlearia_HEID112824G	RN1	155	2444	13.69	5.78	241.56	7334	41.07	5.82	G. max FL	0.938337	1.48253		0.370632
151	HEID112824	B-2012-0546	officinalis	4	24	Coff1612	2015-07-03	03_stdGmax_HEID112824_16807CtG	RN2	115.32	2776	17.88	7.32	182.15	3786	24.42	6.39	G. max FL	0.938337	1.46276		0.365689
151	HEID112824	B-2012-0546	officinalis	4	24	Coff1612	2015-07-06	03_112824_stdGmax_9971ctG	RN1	110.68	3093	38.16	6.68	173.79	1638	20.21	6.67	G. max Polanka	0.938337	1.49397	1.47975	0.373494	3	0.369938
152	HEID112809	B-2012-0547	danica	6	42	Cspec_1598	2015-07-03	04_stdGmax_HEID112809_10214CtG	RN1	111.94	907	10.29	6.3	176.81	2539	28.81	6.11	G. max FL	0.938337	1.46277		0.243794
152	HEID112809	B-2012-0547	danica	6	42	Cspec_1598	2015-07-06	06_112809_stdGmax_6887ctG	RN1	110.4	941	16.59	6.19	173.86	2019	35.6	6.51	G. max Polanka	0.938337	1.4896	1.47618	0.248266	2	0.24603
153	Calp_1377	B-2013-0484	C. alpina	4	24	Calp_1377	2014-08-28	04_Calp1377_0p6Speed_12000CtG	RN1	118.94	1659	16.74	5.9	163.68	1630	16.44	5.19	G. max Polanka	0.938337	1.70463		0.426159	1
157	HEID112945	B-2013-0491	scotica	4	24	Cscot_1326	2015-06-29	06_112945_stdGmax_9417G	RN1	146.59	1642	20.62	4.4	186.71	1748	21.95	4.87	G. max FL	0.938337	1.81398		0.453496	1
157	HEID112951	B-2013-0491	scotica	4	24	Cscot_1451	2015-07-03	06_stdGmax_HEID112951_10289Ct-zaehltenichtweiter	1	131.48	1621	23.51	7.96	184.24	3688	53.49	7.71	G. max FL	0.938337	1.64882		0.412204
157	HEID112951	B-2013-0491	scotica	4	24	Cscot_1451	2015-07-06	10_112951_stdGmax_27922CtG	RN1	128.92	6207	50.24	8.16	181.22	1813	14.68	7.41	G. max Polanka	0.938337	1.66883	1.65883	0.417208	2	0.414706
158	HEID112932	B-2012-0551	scotica	4	24	Cscot_1374a	2015-07-29	04_Gmax2012-0551_HEID112932G	RN1	101.19	11241	50.93	8.23	163.1	6917	31.34	8.2	G. max Polanka	0.938337	1.4554		0.36385	1
158	HEID112934	B-2012-0551	scotica	4	24	Cscot_1374c	2015-06-29	07_112934_stdGmax_17432G	RN2	133.8	2550	14.63	4.77	213.53	3162	18.14	4.71	G. max FL	0.938337	1.44775		0.361938
158	HEID112934	B-2012-0551	scotica	4	24	Cscot_1374c	2015-07-02	07_Cochlearia_HEID112934G	RN1	131.01	2995	15.49	9.66	208.38	6870	35.54	7.33	G. max FL	0.938337	1.4526		0.363149
158	HEID112934	B-2012-0551	scotica	4	24	Cscot_1374c	2015-07-10	10_HEID112934_B-2012-0551_stdGlycine_20072_AbbruchG	RN1	107.57	7490	37.32	6.88	171.01	6564	32.7	6.96	G. max FL	0.938337	1.45334	1.45181	0.363334	3	0.362952
159	HEID112769	B-2012-0552	scotica	4	24	Cscot_1559	2015-07-02	08_Cochlearia_HEID112769G	RN1	128.08	2245	14.51	8.27	204.27	5700	36.84	7.58	G. max FL	0.938337	1.44734		0.361835	1
160	?Cscot_1332	B-2012-0553	scotica	4	24	Cscot_1332	2014-09-12	07_Cscot1332_6642CtG	RN1	99.6	845	14.56	5.05	161.25	1705	29.39	4.5	G. max Polanka	0.938337	1.44897		0.362242	1
160	HEID112928	B-2012-0553	scotica	4	24	Cscot_1375d	2015-07-03	08_stdGmax_HEID112928_15251CtG	RN1	147.79	5175	36.54	6.35	212.76	4065	28.8	6.71	G. max FL	0.938337	1.60491		0.401228
160	HEID112928	B-2012-0553	scotica	4	24	Cscot_1375d	2015-07-06	04_112928_stdGmax_15305CtG	RN1	114.71	5552	43.86	6.56	171.59	2595	20.5	6.44	G. max Polanka	0.938337	1.56822		0.392056
160	HEID112928	B-2012-0553	scotica	4	24	Cscot_1375d	2015-07-10	07_HEID112928_B-2012-0553_stdGlycine_21361CtG	RN1	114.12	2054	11.39	8.34	172.48	9699	53.78	8.54	G. max FL	0.938337	1.52869	1.56728	0.382173	3	0.391819
161	HEID112937	B-2013-0485	scotica	4	24	Cscot_1337	2015-06-29	10_112937_stdGmax_11536G	RN1	121.4	1879	16.29	4.89	192.87	2072	17.96	5.81	G. max FL	0.938337	1.45429		0.363572
161	HEID112937	B-2013-0485	scotica	4	24	Cscot_1337	2015-07-28	05_Gmax2013-0485_HEID112937G	RN1	103.63	4767	21.62	7.94	164.83	9872	44.78	8.14	G. max Polanka	0.938337	1.47485		0.368713
161	HEID112937	B-2013-0485	scotica	4	24	Cscot_1337	2015-07-02	10_Cochlearia_HEID112937G	RN1	147.91	1541	9.46	7.09	226.37	5782	35.49	6.47	G. max FL	0.938337	1.50825	1.47913	0.377062	3	0.369782
162	HEID112892	B-2012-0554	micacea	4	24	Cmic_1338	2014-10-30	02_Cmic1338_0p5Speed_12000Ct	RN1	113.8	888	8.38	4.2	172.54	3773	35.6	4.48	G. max Polanka	0.938337	1.54722		0.386804	1
162	HEID112894	B-2012-0554	micacea	4	24	Cmic_1436	2014-09-18	06_Cmic1436_0p5Sp_11566Ct	1	115.25	1250	14.48	4.34	149.05	3735	43.27	4.22	1. G. max Polanka 2. S. lycopersicum	1	1.54334		0.385835	1
162	HEID112895	B-2012-0554	micacea	4	24	Cmic_1437	2014-10-16	03_Cmic1437_0p6Speed_15000CtG	RN1	117.84	3690	29.57	5.23	178.82	1780	14.26	5.03	G. max Polanka	0.938337	1.54588		0.38647	1
163	HEID112725	B-2012-0555	micacea	4	24	Cmic_1342	2014-09-12	09_Cmic1342_11357CtG	RN1	109.35	1418	14.77	6.14	166.33	3287	34.24	5.37	G. max Polanka	0.938337	1.53222		0.385556
163	HEID112725	B-2012-0555	micacea	4	24	Cmic_1342	2014-10-30	03_Cmic1342_0p5Speed_12000CtG	RN1	114.47	811	7.88	5.72	176.74	3393	32.96	4.22	G. max Polanka	0.938337	1.51034	1.52128	0.379836	2
163	HEID112901	B-2012-0555	micacea	4	24	Cmic_1343	2014-06-20	05_Cmic_1343G	RN1	109.78	1213	13.41	5.3	148.35	3425	37.87	6.54	G. max Polanka	0.938337	1.73594		0.433985
163	HEID112901	B-2012-0555	micacea	4	24	Cmic_1343	2014-06-27	03_Cmic_1343,FCSG	RN1	112.22	1549	24.05	7.63	364.32	1254	19.47	5.63	Z. mays	1.02	1.70603	1.72099	0.426508	2	0.430246
163	HEID112903	B-2012-0555	micacea	4	24	Cmic_1408	2014-10-16	05_Cmic1408_0p6Speed_15000Ct	1	128.25	3491	31.42	5.41	177.66	2341	21.07	4.43	G. max Polanka	0.938337	1.69343		0.423357	1
163	HEID112904	B-2012-0555	micacea	4	24	Cmic_1409	2014-10-16	06_Cmic1409_0p6Speed_15000CtG	RN1	134.58	1920	14.06	5	181.18	1955	14.32	4.62	G. max Polanka	0.938337	1.74249		0.435621
163	HEID112904	B-2012-0555	micacea	4	24	Cmic_1409	2014-10-30	06_Cmic1409_0p5Speed_12000Ct	1	131.31	1162	14.16	4.67	178.61	3168	38.61	4.28	G. max Polanka	0.938337	1.72461	1.73355	0.431153	2	0.433387
167	HEID108776	B-2009-0232	tatrae	6	42	Ctat_1019	2015-07-16	03_Atropa+B-2009-0232_Ctat_1019_40000CtG	RN1	129.87	7274	21.18	6.59	196.44	15103	43.97	6.5	A. belladonna	0.938337	2.4476		0.407933
167	HEID108776	B-2009-0232	tatrae	6	42	Ctat_1019	2015-07-17	08_Atropa+B-2009-0232_HEID108776_25358CtG	RN1	122.77	4486	19.9	7.14	187.69	9865	43.75	6.99	A. belladonna	0.938337	2.42165		0.403609
167	HEID108776	B-2009-0232	tatrae	6	42	Ctat_1019	2015-07-20	04_Atropa+B-2009-0232_HEID108776_21684ctG	RN1	107.91	4366	22.69	9.92	166.77	8930	46.41	9.4	A. belladonna	0.938337	2.39555	2.4216	0.399258	3	0.4036
169	HEID112965	B-2004-0317	officinalis	4	24	Coff_1625	2015-07-06	09_112965_stdGmax_27922CtG	RN1	137.42	2106	12.58	6.92	203.69	3499	20.9	6.59	G. max Polanka	0.938337	1.58263		0.395657
169	HEID112965	B-2004-0317	officinalis	4	24	Coff_1625	2015-07-10	08_HEID112965_B-2004-0317_stdGlycine_32446CtG	RN1	117.32	3731	12.76	7.22	173.82	7839	26.82	6.74	G. max FL	0.938337	1.55944		0.38986
169	HEID112965	B-2004-0317	officinalis	4	24	Coff_1625	2015-07-15	02_B-2004-0317_HEID112965+GmaxFL_32610ctG	RN1	110.38	3032	10.92	8.86	169.17	7229	26.03	8.96	G. max FL	0.938337	1.50752	1.54986	0.37688	3	0.387466
178	?Cdan_1314	B-2007-0009	danica	6	42	Cdan_1314	2014-09-12	08_Cdan1314_13930CtG	5RN1	114.52	1997	17.17	7.66	167.42	5747	49.4	5.5	G. max Polanka	0.938337	1.60462		0.267437	1
178	?Cdan_1315	B-2007-0009	danica	6	42	Cdan_1315	2014-09-12	04_Cdan1315_9139Ct	1	111.87	1245	17.61	5.31	165.52	2085	29.5	4.51	G. max Polanka	0.938337	1.58548		0.264247	1
199	HEID112868	B-2013-0492	pyrenaica	2	12	Calp_1442	2014-08-28	02_Calp1442_0p6Speed_10000CtG	RN1	57.44	736	8.52	5.44	165.34	1653	19.13	5.12	G. max Polanka	0.938337	0.814958		0.407479	1
199	HEID112870	B-2013-0492	pyrenaica	2	12	Calp_1444	2014-08-28	03_Calp1444_0p6Speed_12000CtG	RN1	60.38	1084	10.58	5.48	161.95	1297	12.65	5.12	G. max Polanka	0.938337	0.874603		0.437302	1
200	HEID112872	B-2013-0493	C. alpina/pyrenaica	2	12 o. 24	Cpyr_1347	2014-08-29	03_Cpyr1347_0p6Speed_12000CtG	RN1	64.45	1080	11.4	6.18	184.69	1532	16.18	5.04	G. max Polanka	0.938337	0.818613		0.409306	1
200	HEID112874	B-2013-0493	C. alpina/pyrenaica	2	12 o. 24	Cpyr_1349	2014-08-29	07_Cpyr1349_0p6Speed_15000CtG	RN1	66.98	2026	15.93	5.19	190.33	1265	9.95	4.65	G. max Polanka	0.938337	0.825538		0.412769	1
200	HEID112876	B-2013-0493	C. alpina/pyrenaica	2	12 o. 24	Calp_1394	2015-07-24	07_Raphanus+B-2013-0493_HEID112876_21516CtG	RN1	71.04	2882	14.42	8.01	103.63	3893	19.48	7.69	R. sativus	0.987014	0.751041		0.37552	1
200	HEID112877	B-2013-0493	C. alpina/pyrenaica	2	12 o. 24	Cpyr_1395	2014-09-05	04_Calp1395_Raph_12000Ct	RN1	91.9	799	8.92	6.94	122.44	3381	36.42	5.5	R. sativus	0.987014	0.822315		0.411158
200	HEID112877	B-2013-0493	C. alpina/pyrenaica	2	12 o. 24	Cpyr_1395	2014-09-05	09_Calp1395_Solan_12000CtG	RN1	68.07	909	12.61	10.3	169.05	1702	23.61	4.86	S. lycopersicum	1	0.789217	0.805766	0.394609	2	0.402883
200	HEID112878	B-2013-0493	C. alpina/pyrenaica	2	12 o. 24	Calp_1396	2014-07-18	03_Calp_1396_ohnePVP,FCSG	RN1	52.43	731	8.76	6.6	150.2	2714	32.52	4.26	G. max Polanka	0.938337	0.818858		0.409429
200	HEID112878	B-2013-0493	C. alpina/pyrenaica	2	12 o. 24	Calp_1396	2014-08-14	02_Calp1396jung_0p5Speed_ct10000G	RN1	55.58	1102	12.57	6.4	154.61	621	7.08	4.99	G. max Polanka	0.938337	0.843296		0.421648
200	HEID112878	B-2013-0493	C. alpina/pyrenaica	2	12 o. 24	Calp_1396	2014-08-15	02_Calp1396_0p5Speed_10000CtG	RN1	61.9	1357	15.67	6.86	173.75	1050	12.13	4.69	G. max Polanka	0.938337	0.835728	0.832627	0.417864	3	0.416314
200	HEID112880	B-2013-0493	C. alpina/pyrenaica	2	12 o. 24	Cpyr_1398	2014-08-14	07_Calp1398alt_0p5Speed_ct9066G	RN1	55.38	901	11.32	6.97	158.78	588	7.39	4.72	G. max Polanka	0.938337	0.818194		0.409097
200	HEID112880	B-2013-0493	C. alpina/pyrenaica	2	12 o. 24	Cpyr_1398	2014-08-15	06_Calp1398_0p5Speed_10000CtG	RN1	59.58	1078	11.93	6.31	177.56	1220	13.5	3.98	G. max Polanka	0.938337	0.787144	0.802669	0.393572	2	0.401334
203	?Calp_1352	B-2013-0495	C. alpina/pyrenaica	4	12 o. 24	Calp_1352	2014-08-29	04_Cpyr1352_0p6Speed_14000Ct	1	118.2	1692	19.98	5.11	181.24	1765	20.84	5.26	G. max Polanka	0.938337	1.5299		0.382474	1
203	HEID112849	B-2013-0495	C. alpina/pyrenaica	4	12 o. 24	Calp_1350	2015-01-22	06_Glycine+Calp1350Pop203_0p4Sp_10000CtG	RN1	107.85	1211	14.88	5.8	165.4	2009	24.69	5.98	G. max Polanka	0.938337	1.52962		0.382405	1
203	HEID112850	B-2013-0495	C. alpina/pyrenaica	4	12 o. 24	Calp_1351	2014-08-29	02_Cpyr1351_0p6Speed_11792Ct	1	127.77	1372	19.87	5.67	176.94	1782	25.81	5.3	G. max Polanka	0.938337	1.69395		0.423489	1
203	HEID112987	B-2013-0495	C. alpina/pyrenaica	4	12 o. 24	Calp_1446	2014-10-16	02_Calp1446_0p6Speed_10000CtG	RN1	115.42	1464	17.1	5.61	174.9	2074	24.23	4.88	G. max Polanka	0.938337	1.54807		0.387017
203	HEID112987	B-2013-0495	C. alpina/pyrenaica	4	12 o. 24	Calp_1446	2015-06-30	08_Cochlearia_HEID112987G	RN1	131.48	1933	12.12	4.77	205.47	4884	30.63	5.02	G. max FL	0.938337	1.47845		0.369614
203	HEID112987	B-2013-0495	C. alpina/pyrenaica	4	12 o. 24	Calp_1446	2015-07-29	02_Gmax2013-0495_HEID112987G	RN1	107.62	9260	27.77	8.57	166.05	13246	39.72	8.99	G. max FL	0.938337	1.52038	1.51564	0.380096	3	0.378909
204	HEID112772	B-2013-0496	officinalis	4	24	Coff_1562	2015-06-30	09_Cochlearia_HEID112772G	RN1	127.74	2153	12.72	5.33	205.68	5165	30.5	5.46	G. max FL	0.938337	1.43493		0.358733
204	HEID112772	B-2013-0496	officinalis	4	24	Coff_1562	2015-07-21	10_Gmax + B-2013-0496_HEID112772_19438ctG	RN1	122.57	2389	12.68	7.88	200.52	8525	45.24	8.8	G. max Polanka	0.938337	1.43392		0.35848
204	HEID112772	B-2013-0496	officinalis	4	24	Coff_1562	2016-03-31	03_Glycine+HEID112772.fcs	RN1	122.16	6241	22.16	5.05	201.01	5715	20.29	4.54	G. max Polanka	0.938337	1.42564		0.35641
204	HEID112772	B-2013-0496	officinalis	4	24	Coff_1562	2016-04-01	03_Glycine+HEID112772.fcs	RN1	137.25	7834	35.06	5.22	216.11	4371	19.56	4.14	G. max Polanka	0.938337	1.48983	1.44608	0.372457	4	0.36152
205	HEID112788	B-2013-0497	officinalis (x hollandica)	6	24	Coff_1577	2015-07-23	10_Atropa+B-2013-0497_HEID112788G	RN1	121.47	2577	15.1	8.69	195.98	4820	55.42	9.21	A. belladonna	0.938337	2.29466		0.382443	1
206	HEID112727	B-2013-0498	C. anglica (x hollandica)	6	48	Cang_1432	2015-07-15	09_B-2013-0498_HEID112727+Atropa_21734G	RN1	118.12	8922	46.73	7.95	199.95	4846	25.38	8.1	A. belladonna	0.938337	2.18707		0.364512
206	HEID112727	B-2013-0498	C. anglica (x hollandica)	6	48	Cang_1432	2015-07-16	05_Atropa+B-2013-0498_HEID112727G	RN1	111.12	8885	24.35	7.26	186.44	15989	43.82	7.26	A. belladonna	0.938337	2.20655		0.367758
206	HEID112727	B-2013-0498	C. anglica (x hollandica)	6	48	Cang_1432	2015-07-17	09_Atropa+B-2013-0498_HEID112727_40000CtG	RN1	109.48	7653	21.08	7.35	182.53	18126	49.92	7.18	A. belladonna	0.938337	2.22055	2.2	0.370092	3	0.367454
207	HEID112826	B-2013-0499	C. anglica (x hollandica)	6	48	Cang_1614	2015-07-15	10_B-2013-0499_HEID112826+Atropa_40000CtG	RN1	119.54	7183	19.86	7.67	198.06	17693	48.92	7.44	A. belladonna	0.938337	2.23448		0.372414
207	HEID112826	B-2013-0499	C. anglica (x hollandica)	6	48	Cang_1614	2015-07-16	06_Atropa+B-2013-0499_HEID112826_25515CtG	RN1	113.61	9767	44.02	8.64	187.65	6531	29.44	8.43	A. belladonna	0.938337	2.24145		0.373575
207	HEID112826	B-2013-0499	C. anglica (x hollandica)	6	48	Cang_1614	2015-07-17	10_Atropa+B-2013-0499_HEID112826_40000CtG	RN1	113.4	7373	21.36	6.92	186.43	18486	53.55	6.91	A. belladonna	0.938337	2.25195	2.24263	0.375324	3	0.373771
210	HEID113122	B-2013-0535	C. islandica	2	12	Cisla_1832	2016-03-11	09_Glycine+HEID113122.fcs	RN1	60.74	1199	7.27	8.12	185.35	6034	36.57	5.28	G. max Polanka	0.938337	0.768743		0.384371
210	HEID113122	B-2013-0535	C. islandica	2	12	Cisla_1832	2016-03-24	13_Glycine+HEID113122.fcs	RN1	56.79	2335	8.11	6.71	176.97	6076	21.1	4.82	G. max Polanka	0.938337	0.752785		0.376393
210	HEID113122	B-2013-0535	C. islandica	2	12	Cisla_1832	2016-03-30	03_Glycine+HEID113122.fcs	RN1	64.17	5011	19.62	7.82	191.26	3234	12.66	3.98	G. max Polanka	0.938337	0.787058	0.769529	0.393529	3	0.384764
210	HEID113126	B-2013-0535	C. islandica	2	12	Cisla_1836	2016-03-24	14_Glycine+HEID113126.fcs	RN1	55.94	2366	10.47	6.81	172.53	7176	31.77	4.46	G. max Polanka	0.938337	0.760601		0.3803
210	HEID113126	B-2013-0535	C. islandica	2	12	Cisla_1836	2016-03-30	04_Glycine+HEID113126.fcs	RN1	61.84	5209	17.18	7.59	186.12	4186	13.8	4.66	G. max Polanka	0.938337	0.779427	0.770014	0.389713	2	0.385007
210	HEID125633	B-2013-0535	C. islandica	2	12	Cisla_1298	2014-04-23	08_125633_15000_gating.FCS	PK1	62.77	901	10.49	11.56	181.18	876	17.52	8.05	S. lycopersicum	1	0.68		0.34
210	HEID125633	B-2013-0535	C. islandica	2	12	Cisla_1298	2014-04-28	03_125633_15000_gating.FCS	PK1	111.55	931	11.87	12.74	200.53	3289	41.94	12.8	R. sativus	0.987014	0.651429	0.651429	0.325715	2	0.325715
210	HEID125638	B-2013-0535	C. islandica	2	12	Cisla_1303	2014-04-23	07_125638_15000_gating.FCS	PK1	59.99	1395	12.84	18.37	177.39	941	18.82	9.39	S. lycopersicum	1	0.66		0.33
210	HEID125638	B-2013-0535	C. islandica	2	12	Cisla_1303	2014-04-28	04_125638_1500_gating.FCS	PK1	112.59	1160	23.2	10.18	217.56	1919	38.38	11.6	R. sativus	0.987014	0.651429	0.651429	0.325715	2	0.325715
210	HEID125643	B-2013-0535	C. islandica	2	12	Cgroe/Coff 919222	2014-09-18	10_Coff919222CgroeBNr135643_0p5Sp_15000Ct	1	51.05	1375	12.81	7.59	144.74	3510	32.7	5.12	S. lycopersicum	1	0.691295		0.345647	1
212	HEID113047	B-2013-0539	pyrenaica	2	12	Cpyr_1698	2015-04-24	02_Cpyr1698_0p4Sp10636Ct,FCSG	RN1	76.27	1686	20.08	7.76	113.37	2981	35.5	7.47	R. sativus	0.987014	0.737058		0.368529	1
212	HEID113053	B-2013-0541	pyrenaica	2	12	Cpyr_170x	2015-07-24	03_Raphanus+B-2013-0541_HEID113053_40000CtG	RN1	67.95	1681	5.11	8.13	105.79	21169	64.33	8.7	R. sativus	0.987014	0.703706		0.351853	1
221	Cses_1291	ALA accn V172737	sessilifolia	2	14	Cses_1291	2014-04-23	09_Cses_1291_15000_gating.fcs	1	72.39	1571	14.57	9.6	191.27	2118	19.64	5.8	S. lycopersicum	1	0.74		0.37
221	Cses_1291	ALA accn V172737	sessilifolia	2	14	Cses_1291	2014-04-28	05_Cses_1291_15000_gating.fcs	1	118.5	1169	14.97	8.95	174.6	2195	28.1	8.73	R. sativus	0.987014	0.75013		0.375065
221	Cses_1291	ALA accn V172737	sessilifolia	2	14	Cses_1291	2014-05-02	02_Cses_1291_15000_gating.fcs	1	75.3	2644	23.55	8.89	107.14	1857	16.54	7.98	R. sativus	0.987014	0.769871	0.760001	0.384935	3	0.38
266	HEID112978	B-2004-0919	anglica/officinalis	4	48	Cang_1638	2015-06-30	10_Cochlearia_HEID112978G	RN1	125.88	6440	38.9	6.36	186.95	5047	30.49	6.67	G. max FL	0.938337	1.55571		0.388927	1
267	HEID113056	B-2014-0149	bavarica	6	36	HEID113056	2015-07-20	05_Atropa+B-2014-0149_HEID113056_40000ctG	RN1	107.81	4092	10.81	11.01	174.94	22163	58.56	9.5	A. belladonna	0.938337	2.28155		0.380259	1
267	HEID113058	B-2014-0149	bavarica	6	36	HEID113058	2015-07-22	04_Raphanus+B-2014-0149_HEID113058_13234ctG	RN2	194.42	5265	46.32	6	94.28	4044	35.58	7.84	R. sativus	0.987014	2.25927		0.376544	1
270	HEID109736-1	B-2006-388	borzeana	8	48	Cbor_1063a	2015-07-07	06_109736-1_stdLycopersicum_19290G	RN1	150.92	4095	25.59	6.11	206.18	7112	44.45	5.7	S. lycopersicum	1	2.67766		0.334708
270	HEID109736-1	B-2006-388	borzeana	8	48	Cbor_1063a	2015-07-16	08_Solanum+B-2006-0388_HEID109736-1_26391CtG	RN2	215.22	7642	36.25	7.21	150.05	6902	32.74	6.96	S. lycopersicum	1	2.81127		0.351409
270	HEID109736-1	B-2006-388	borzeana	8	48	Cbor_1063a	2015-07-17	02_Solanum+B-2006-0388_HEID109736-1G	RN2	173.01	7328	35.89	7.7	126.51	7599	37.22	9.55	S. lycopersicum	1	2.68042	2.72312	0.335052	3	0.34039
274	HEID125644	n/a	C. excelsa	2	12	Cexc_1839	2016-03-15	06_Glycine+HEID125644.fcs	RN1	68.42	1942	8.65	5.38	188.43	6194	27.58	4.24	G. max Polanka	0.938337	0.851789		0.425894
274	HEID125644	n/a	C. excelsa	2	12	Cexc_1839	2016-03-24	06_Glycine+HEID125644.fcs	RN1	66.37	2579	11.03	6.71	179.2	8176	34.98	4.85	G. max Polanka	0.938337	0.868826		0.434413
274	HEID125644	n/a	C. excelsa	2	12	Cexc_1839	2016-03-30	05_Glycine+HEID125644.fcs	RN1	73.29	3759	18.68	6.79	196.23	4023	19.99	5.01	G. max Polanka	0.938337	0.87615	0.865588	0.438075	3	0.432794
281	HEID113102	B-2015-0168	C. danica	6	42	Cdan_1812	2016-03-30	06_Glycine+HEID103102.fcs	RN1	127.13	8133	32.3	6.3	196.5	6336	25.17	5.15	G. max Polanka	0.938337	1.51769		0.252949
281	HEID113102	B-2015-0168	C. danica	6	42	Cdan_1812	2016-03-24	02_Glycine+HEID113102	RN1	117.19	2693	18.23	5.06	186.49	4807	32.55	4.25	G. max Polanka	0.938337	1.47412	1.49591	0.245687	2	0.249318
281	HEID113107	B-2015-0168	C. danica	6	42	Cdan_1817	2016-03-24	08_Glycine+HEID113107.fcs	RN1	116.16	6911	22.28	5.23	183.58	10681	34.43	4.34	G. max Polanka	0.938337	1.48433		0.247388
281	HEID113107	B-2015-0168	C. danica	6	42	Cdan_1817	2016-03-30	08_Glycine+HEID113107.fcs	RN1	116.78	3420	31.3	4.45	185.06	3027	27.7	4.48	G. max Polanka	0.938337	1.48032	1.48232	0.24672	2	0.247054
281	HEID113108	B-2015-0168	C. danica	6	42	Cdan_1818	2016-03-24	07_Glycine+HEID113108.fcs	RN1	105.04	4069	16.91	4.96	165.42	10109	42.01	4.35	G. max Polanka	0.938337	1.48959		0.248264
281	HEID113108	B-2015-0168	C. danica	6	42	Cdan_1818	2016-03-30	07_Glycine+HEID113108.fcs	RN1	130.15	7717	29.42	6.61	199.8	5009	19.09	5.04	G. max Polanka	0.938337	1.52809	1.50884	0.254681	2	0.251473
292	HEID006209	n/a	C. officinalis	4	24	n/a	2016-03-11	07_Glycine+HEID006209.fcs	RN1	114.37	4159	32.35	5.78	165.94	3457	26.89	5.45	G. max Polanka	0.938337	1.61681		0.404203
292	HEID006209	n/a	C. officinalis	4	24	n/a	2016-03-15	02_Glycine+HEID006209.fcs	RN1	136.48	6952	27.81	5.65	200.06	6905	27.62	4.99	G. max Polanka	0.938337	1.60032	1.60857	0.400081	2	0.402142
293	HEID006210	n/a	C. officinalis	4	24	n/a	2016-03-11	08_Glycine+HEID006210.fcs	RN1	117.05	4541	21.17	5.99	172.22	6535	30.46	5.64	G. max Polanka	0.938337	1.59436		0.39859
293	HEID006210	n/a	C. officinalis	4	24	n/a	2016-03-15	03_Glycine+HEID006210.fcs	RN1	134.64	6091	24.36	6.36	195.94	4494	17.98	5.58	G. max Polanka	0.938337	1.61194	1.60315	0.402986	2	0.400788
296	HEID113110	B-2015-0167	C. danica	6	42	Cdan_1820	2016-03-24	09_Glycine+HEID113110.fcs	RN1	116.26	4764	11.91	5.71	186.26	14273	35.68	4.66	G. max Polanka	0.938337	1.46423		0.244039
296	HEID113110	B-2015-0167	C. danica	6	42	Cdan_1820	2016-03-30	09_Glycine+HEID113110.fcs	RN1	135.1	6305	30.74	7.63	207.36	3507	17.1	4.78	G. max Polanka	0.938337	1.52837	1.4963	0.254729	2	0.249384
296	HEID113111	B-2015-0167	C. danica	6	42	Cdan_1821	2016-03-24	10_Glycine+HEID113111.fcs	RN1	111.2	6171	26.93	5.31	178.4	4294	18.74	4.2	G. max Polanka	0.938337	1.46221		0.243701
296	HEID113111	B-2015-0167	C. danica	6	42	Cdan_1821	2016-03-30	10_Glycine+HEID113111.fcs	RN1	133.26	8506	34.31	7.5	206.65	5021	20.25	5.81	G. max Polanka	0.938337	1.51274	1.48747	0.252123	2	0.247912
297	HEID113112	B-2015-0166	C. danica	6	42	Cdan_1822	2016-03-22	10_Glycine+HEID113112.FCS	RN1	117.34	1878	7.16	5.11	187.98	11346	43.29	4.51	G. max Polanka	0.938337	1.46431		0.244052
297	HEID113112	B-2015-0166	C. danica	6	42	Cdan_1822	2016-03-24	11_Glycine+HEID113112.fcs	RN1	118.76	3804	20.49	5.47	187	5302	28.56	4.55	G. max Polanka	0.938337	1.4898		0.2483
297	HEID113112	B-2015-0166	C. danica	6	42	Cdan_1822	2016-03-30	11_Glycine+HEID113112.fcs	RN1	134.2	5299	29.93	7.35	205.29	5088	28.74	5.36	G. max Polanka	0.938337	1.5335	1.49587	0.255583	3	0.249312
297	HEID113115	B-2015-0166	C. danica	6	42	Cdan_1825	2016-03-24	12_Glycine+HEID113115.fcs	RN1	120.54	4955	17.43	5.54	188.4	9750	34.3	4.35	G. max Polanka	0.938337	1.50089		0.250149
297	HEID113115	B-2015-0166	C. danica	6	42	Cdan_1825	2016-03-30	12_Glycine+HEID113115.fcs	RN1	122.65	5504	31.08	6.02	191.12	4771	26.94	4.89	G. max Polanka	0.938337	1.50543	1.50316	0.250905	2	0.250527
222c	Cses_1807	ALA accn V170179	sessilifolia	2	14	Cses_1807	2014-04-28	09_Cses_1807_15000_gating.fcs	1	126.69	714	8.8	7.76	190.09	3837	47.28	6.47	R. sativus	0.987014	0.72039		0.364195	1
222c	Cses_1808	ALA accn V170179	sessilifolia	2	14	Cses_1808	2014-05-02	05_Cses_1808_15000_gating.FCS	1	73.82	1802	14.11	9.2	113.29	3444	26.98	6.5	R. sativus	0.987014	0.72039		0.364195	1
223b	Cses_1292	ALA accn V170200	sessilifolia	2	14	Cses_1292	2014-04-23	10_Cses_1292_15000_gating.fcs	1	73.5	1455	12.31	12.94	189.7	2874	24.31	5.25	S. lycopersicum	1	0.74		0.37
223b	Cses_1292	ALA accn V170200	sessilifolia	2	14	Cses_1292	2014-04-28	06_Cses_1292_15000_gating.fcs	1	118.71	1301	14.58	15.37	181.49	3017	33.8	8.22	R. sativus	0.987014	0.75013		0.375065
223b	Cses_1292	ALA accn V170200	sessilifolia	2	14	Cses_1292	2014-05-02	03_Cses_1292_15000_gating.fcs	1	76.49	1261	10.71	10.13	113.3	4214	35.79	6.39	R. sativus	0.987014	0.75013	0.746754	0.375065	3	0.373377
