# Supplementary material for: Evolutionary footprints of a cold relic in a rapidly warming world
Source: eLife. 2021 Dec 21;10:e71572. doi: 10.7554/eLife.71572 (PMC8741218; doi:10.7554/eLife.71572)
Supplement: Supplementary file 17. — Eight mitochondrial de novo consensus sequences generated from sample Cmica_0979 (Cochlearia micacea) and chosen as reference sequences for mitochondrial genome mappings, with information on contig length and annotated gene content. [file elife-71572-supp17.xlsx]

## Sheet: Tabelle1
Supplementary Table 12. Information on mitochondrial DNA sequence reference contigs. Eight mitochondrial de novo consensus sequences generated from sample Cmica_0979 (Cochlearia micacea) and chosen as reference sequences for mitochondrial genome mappings, with information on contig length and annotated gene content.
contig name	contig length	annotated mt gene content
contig 3	90,418 bp	ccmB, ccmFC, cox3, matR, orf161, nad1 (exon 4, 5), nad5, nad7, orfB (atp8), atp1, orf25 (atp4), nad4L; tRNA-Gly, tRNA-Tyr, tRNA-fMet, tRNA-Asp, tRNA-Cys, tRNA-Pro, tRNA-Glu
contig 4	68,240 bp	rps3 (exon 1), ccmC, cox2, cob, rpl5, rpl16, cox1, atp6; tRNA-Ser, tRNA-Tyr, tRNA-Lys
contig 8	24,860 bp	ccmFN1, nad6; tRNA-Trp
contig 11	11,520 bp	nad1 (exon 1)
contig 18	44,257 bp	ccb203 (partial), nad5 (exon 3), nad2 (exon 3, 4, 5), nad9; tRNA-Gln, tRNA-Met
contig 33	11,474 bp	atp9, nad1 (exon 2, 3); tRNA-fMet, tRNA-Ile
contig 45	46,512 bp	nad2 (exon 1, 2), rps4, rps7, rps12 (partial), rps3 (exon 1), rpl2, orfX (partial), nad4, orf116
contig 199	10,229 bp	nad5 (exon 4, 5)
