# Supplementary material for: Evolutionary footprints of a cold relic in a rapidly warming world
Source: eLife. 2021 Dec 21;10:e71572. doi: 10.7554/eLife.71572 (PMC8741218; doi:10.7554/eLife.71572)
Supplement: Supplementary file 18. — SI = strict isolation, CM = continuous migration from the population split to the present, OSC = ongoing secondary contact with gene flow starting after population split and continuing up to the present, PSC = past secondary contact with gene flow starting after population split and stopping before the present. Population sizes (N) in natural units, time (t) in number of generations ago, and migration rates (m) as the fraction of the recipient population made up of immigrants per generation. N parameters were also explored with a higher upper bound, 3 million. [file elife-71572-supp18.xlsx]

## Sheet: Tabelle1
Supplementary File 18. Prior distributions of the explored ABC models. SI = strict isolation, CM = continuous migration from the population split to the present, OSC = ongoing secondary contact with gene flow starting after population split and continuing up to the present, PSC = past secondary contact with gene flow starting after population split and stopping before the present. Population size…
parameter	SI	CM	OSC	PSC
N_ARC_recent	[1000, 400000]	[1000, 400000]	[1000, 400000]	[1000, 400000]
N_EUR_recent	[1000, 400000]	[1000, 400000]	[1000, 400000]	[1000, 400000]
N_ARC_ancient	[1000, 400000]	[1000, 400000]	[1000, 400000]	[1000, 400000]
N_EUR_ancient	[1000, 400000]	[1000, 400000]	[1000, 400000]	[1000, 400000]
N_ancestor	[1000, 400000]	[1000, 400000]	[1000, 400000]	[1000, 400000]
t_mig_start	NA	0	0	[0,t_pop_split]
t_mig_stop	NA	t_pop_split	[t_mig_start,t_pop_split]	[t_mig_start,t_pop_split]
t_pop_split	[100,100000]	[100,100000]	[100,100000]	[100,100000]
m_into_EUR_from_ARC	NA	[10^-7,10^-4]	[10^-7,10^-4]	[10^-7,10^-4]
m_into_ARC_from_EUR	NA	[10^-7,10^-4]	[10^-7,10^-4]	[10^-7,10^-4]
