# Supplementary material for: Evolutionary footprints of a cold relic in a rapidly warming world
Source: eLife. 2021 Dec 21;10:e71572. doi: 10.7554/eLife.71572 (PMC8741218; doi:10.7554/eLife.71572)
Supplement: Supplementary file 19. — Correlation table (generated using SPSS version 28) for all 19 standard topo-climatic variables as downloaded for 28 Cochlearia accessions from the high-resolution climate data WorldClim grids at a resolution of 30″ (~1 km²/pixel). [file elife-71572-supp19.xlsx]

## Sheet: Tabelle1
Supplementary File 19. SPSS Correlation Matrix of bioclimatic variables. Correlation table (generated using SPSS version 28) for all 19 standard topo-climatic variables as downloaded for 28 Cochlearia accessions from the high-resolution climate data WorldClim grids at a resolution of 30 arcseconds (~1 km² / pixel).
Correlation Matrix
		bio01	bio02	bio03	bio04	bio05	bio06	bio07	bio08	bio09	bio10	bio11	bio12	bio13	bio14	bio15	bio16	bio17	bio18	bio19
Sig. (1-tailed)	bio01		0.07	0	0.156	0	0	0.329	0.041	0.003	0	0	0.012	0.007	0.023	0.381	0.011	0.025	0.002	0.071
	bio02	0.07		0.413	0	0	0.057	0	0	0.015	0	0.191	0.011	0.094	0.002	0.001	0.073	0.003	0.352	0.001
	bio03	0	0.413		0	0.158	0	0.004	0.207	0	0.096	0	0.359	0.489	0.317	0.076	0.446	0.344	0.023	0.148
	bio04	0.156	0	0		0.005	0	0	0	0	0.041	0	0.016	0.125	0.004	0	0.089	0.006	0.053	0
	bio05	0	0	0.158	0.005		0.175	0	0	0.44	0	0.053	0	0.002	0	0.049	0.002	0	0.06	0
	bio06	0	0.057	0	0	0.175		0	0.142	0	0.03	0	0.47	0.198	0.351	0.005	0.26	0.358	0.001	0.156
	bio07	0.329	0	0.004	0	0	0		0	0	0.012	0.001	0.009	0.098	0.001	0	0.067	0.002	0.108	0
	bio08	0.041	0	0.207	0	0	0.142	0		0.002	0	0.318	0	0.001	0	0.005	0.001	0	0.44	0
	bio09	0.003	0.015	0	0	0.44	0	0	0.002		0.306	0	0.125	0.392	0.075	0.006	0.332	0.059	0.002	0.005
	bio10	0	0	0.096	0.041	0	0.03	0.012	0	0.306		0.005	0	0.001	0	0.1	0.001	0	0.021	0.001
	bio11	0	0.191	0	0	0.053	0	0.001	0.318	0	0.005		0.283	0.11	0.425	0.023	0.15	0.423	0	0.314
	bio12	0.012	0.011	0.359	0.016	0	0.47	0.009	0	0.125	0	0.283		0	0	0.327	0	0	0.001	0
	bio13	0.007	0.094	0.489	0.125	0.002	0.198	0.098	0.001	0.392	0.001	0.11	0		0	0.22	0	0	0	0
	bio14	0.023	0.002	0.317	0.004	0	0.351	0.001	0	0.075	0	0.425	0	0		0.134	0	0	0.003	0
	bio15	0.381	0.001	0.076	0	0.049	0.005	0	0.005	0.006	0.1	0.023	0.327	0.22	0.134		0.255	0.131	0.013	0.084
	bio16	0.011	0.073	0.446	0.089	0.002	0.26	0.067	0.001	0.332	0.001	0.15	0	0	0	0.255		0	0	0
	bio17	0.025	0.003	0.344	0.006	0	0.358	0.002	0	0.059	0	0.423	0	0	0	0.131	0		0.002	0
	bio18	0.002	0.352	0.023	0.053	0.06	0.001	0.108	0.44	0.002	0.021	0	0.001	0	0.003	0.013	0	0.002		0.107
	bio19	0.071	0.001	0.148	0	0	0.156	0	0	0.005	0.001	0.314	0	0	0	0.084	0	0	0.107
